# Supplementary material for: A joint optimization QSAR model of fathead minnow acute toxicity based on a radial basis function neural network and its consensus modeling
Source: Royal Society of Chemistry journal article supplement (doi:10.1039/d0ra02701d), 2020-01-01
Supplement: d0ra02701d4.pdf [file d0ra02701d4.pdf]

## Supplementary Materials

### **A Joint Optimization QSAR Model of Fathead Minnow Acute Toxicity Based on a Radial Basis Function Neural Network and Its Consensus Modeling**

<sup>a,b</sup>Yukun Wang <sup>1,2</sup> and <sup>b\*</sup>Xuebo Chen

<sup>a</sup> School of Chemical Engineering, University of Science and Technology Liaoning, No. 185, Qianshan, Anshan 114051, Liaoning, China; wyk410@163.com

<sup>b</sup> School of Electronic and Information Engineering, University of Science and Technology Liaoning, No. 185, Qianshan, Anshan 114051, Liaoning, China

\* Correspondence: xuebochen@126.com; Tel.: +864125928367

**Table S1 Deleted compounds and the reason for deletion**

| No. | CAS        | Reason for deletion |
|-----|------------|---------------------|
| 1   | 71862-02-7 | *                   |
| 2   | 98434-34-5 | *                   |
| 3   | 10-15-1    | *                   |
| 4   | 3944-76-1  | *                   |
| 5   | 22037-97-4 | *                   |
| 6   | 56348-39-1 | *                   |
| 7   | 61096-84-2 | *                   |
| 8   | 108-20-3   | **                  |

\* We can't query its SMILES file on the website (<https://chem.nlm.nih.gov/chemidplus/chemidlite.jsp>), so we can't compute its descriptors. The CAS code may be wrong. \*\* We cannot calculate its descriptors using PaDEL software.

**Table S2 Details of 56 selected descriptors**

| NO. | Descriptor name | Type                                      | Description                                                            | Extended Class                 |
|-----|-----------------|-------------------------------------------|------------------------------------------------------------------------|--------------------------------|
| 1   | XLogP           | XLogPDescriptor                           | Prediction of logP based on the atom-type method called XLogP.         | Molecular property descriptors |
| 2   | khs.dsCH        | ElectrotopologicalStateAtomTypeDescriptor | Count of atom-type E-State: =CH-                                       | E-state                        |
| 3   | MATS1c          | Moran AutocorrelationDescriptor           | Moran autocorrelation - lag 1 / weighted by charges                    | Autocorrelation descriptors    |
| 4   | GATS1i          | Geary AutocorrelationDescriptor           | Geary autocorrelation - lag 1 / weighted by first ionization potential | Autocorrelation descriptors    |
| 5   | GATS4v          | Geary AutocorrelationDescriptor           | Geary autocorrelation - lag 4 / weighted by van der Waals volumes      | Autocorrelation descriptors    |
| 6   | CrippenLogP     | CrippenDescriptor                         | Crippen's LogP                                                         | Constitutional descriptors     |
| 7   | GATS6i          | Geary AutocorrelationDescriptor           | Geary autocorrelation - lag 6 / weighted by first ionization potential | Autocorrelation descriptors    |
| 8   | GATS1m          | Geary AutocorrelationDescriptor           | Geary autocorrelation - lag 1 / weighted by mass                       | Autocorrelation descriptors    |
| 9   | MLogP           | MannholdLogPDescriptor                    | Mannhold LogP                                                          | Molecular property descriptors |
| 10  | nN              | AtomCountDescriptor                       | Number of nitrogen atoms                                               | Constitutional descriptors     |
| 11  | AMR             | AMRDescriptor                             | Molar refractivity                                                     | Constitutional descriptors     |
| 12  | GATS1v          | Geary AutocorrelationDescriptor           | Geary autocorrelation - lag 1 / weighted by van der Waals volumes      | Autocorrelation descriptors    |
| 13  | Khs.ssS         | ElectrotopologicalStateAtomTypeDescriptor | Count of atom-type E-State: -S-                                        | E-state descriptors            |
| 14  | C2SP3           | CarbonTypesDescriptor                     | Singly bound carbon bound to two other carbons                         | Topological descriptors        |
| 15  | MDEC-22         | MDEDescriptor                             | Molecular distance edge between all secondary carbons                  | Topological descriptors        |
| 16  | GATS2s          | Geary AutocorrelationDescriptor           | Geary autocorrelation - lag 2 / weighted by I-state                    | Autocorrelation descriptors    |
| 17  | MATS2m          | Moran AutocorrelationDescriptor           | Moran autocorrelation - lag 2 / weighted by mass                       | Autocorrelation descriptors    |

|    |            |                                                |                                                                                                |                             |
|----|------------|------------------------------------------------|------------------------------------------------------------------------------------------------|-----------------------------|
| 18 | C1SP3      | CarbonTypesDescriptor                          | Singly bound carbon bound to one other carbon                                                  | Topological descriptors     |
| 19 | SIC1       | StructuralInformationContentDescriptor         | Structural information content index (neighborhood symmetry of 1-order)                        | Basak descriptors           |
| 20 | khs.sssCH  | ElectrotopologicalStateAtomTypeDescriptor      | Count of atom-type E-State: >CH-                                                               | E-state descriptors         |
| 21 | IC2        | InformationContentDescriptor                   | Information content index (neighborhood symmetry of 2-order)                                   | Basak descriptors           |
| 22 | JGI9       | TopologicalChargeDescriptor                    | Mean topological charge index of order 9                                                       | Topological descriptors     |
| 23 | SIC2       | StructuralInformationContentDescriptor         | Structural information content index (neighborhood symmetry of 2-order)                        | Basak descriptors           |
| 24 | naAromAtom | AromaticAtomsCountDescriptor                   | Number of aromatic atoms                                                                       | Constitutional descriptors  |
| 25 | IC1        | InformationContentDescriptor                   | Information content index (neighborhood symmetry of 1-order)                                   | Basak descriptors           |
| 26 | C1SP2      | CarbonTypesDescriptor                          | Doubly bound carbon bound to one other carbon                                                  | Topological descriptors     |
| 27 | AATS7v     | Average Broto-Moreau AutocorrelationDescriptor | Average Broto-Moreau autocorrelation - lag 7 / weighted by van der Waals volumes               | Autocorrelation descriptors |
| 28 | AATS1i     | Average Broto-Moreau AutocorrelationDescriptor | Average Broto-Moreau autocorrelation - lag 1 / weighted by first ionization potential          | Autocorrelation descriptors |
| 29 | SIC3       | StructuralInformationContentDescriptor         | Structural information content index (neighborhood symmetry of 3-order)                        | Basak descriptors           |
| 30 | MDEC-23    | MDEDescriptor                                  | Molecular distance edge between all secondary and tertiary carbons                             | Topological descriptors     |
| 31 | khs.ddsN   | ElectrotopologicalStateAtomTypeDescriptor      | Count of atom-type E-State: -N<<                                                               | E-state descriptors         |
| 32 | AATS5v     | Average Broto-Moreau AutocorrelationDescriptor | Average Broto-Moreau autocorrelation - lag 5 / weighted by van der Waals volumes               | Autocorrelation descriptors |
| 33 | VE1D       | BaryszMatrixDescriptor                         | Coefficient sum of the last eigenvector from Barysz matrix / weighted by van der Waals volumes | Topological descriptors     |
| 34 | RotBFrac   | RotatableBondsCountDescriptor                  | Fraction of rotatable bonds, excluding terminal bonds                                          | Constitutional descriptors  |
| 35 | Khs.sNH2   | ElectrotopologicalStateAtomTypeDescriptor      | Count of atom-type E-State: -NH2                                                               | E-state descriptors         |
| 36 | MDEC-33    | MDEDescriptor                                  | Molecular distance edge between all tertiary carbons                                           | Topological descriptors     |
| 37 | JGI4       | TopologicalChargeDescriptor                    | Mean topological charge index of order 4                                                       | Topological descriptors     |
| 38 | FMF        | FMFDescriptor                                  | Complexity of a molecule                                                                       | Topological descriptors     |
| 39 | AATS7e     | Average Broto-Moreau                           | Average Broto-Moreau                                                                           | Autocorrelation             |

|    |              |                                                |                                                                                          |                             |
|----|--------------|------------------------------------------------|------------------------------------------------------------------------------------------|-----------------------------|
|    |              | AutocorrelationDescriptor                      | autocorrelation - lag 7 / weighted by Sanderson electronegativities                      | descriptors                 |
| 40 | JGI2         | TopologicalChargeDescriptor                    | Mean topological charge index of order 2                                                 | Topological descriptors     |
| 41 | khs.dO       | ElectrotopologicalStateAtomTypeDescriptor      | Count of atom-type E-State: =O                                                           | E-state descriptors         |
| 42 | khs.aasC     | ElectrotopologicalStateAtomTypeDescriptor      | Count of atom-type E-State: :C:-                                                         | E-state descriptors         |
| 43 | RotBtFrac    | RotatableBondsCountDescriptor                  | Fraction of rotatable bonds, including terminal bonds                                    | Constitutional descriptors  |
| 44 | khs.dCH2     | ElectrotopologicalStateAtomTypeDescriptor      | Count of atom-type H E-State: =CH2                                                       | E-state descriptors         |
| 45 | C3SP2        | CarbonTypesDescriptor                          | Doubly bound carbon bound to three other carbons                                         | Topological descriptors     |
| 46 | JGI6         | TopologicalChargeDescriptor                    | Mean topological charge index of order 6                                                 | Topological descriptors     |
| 47 | JGI8         | TopologicalChargeDescriptor                    | Mean topological charge index of order 8                                                 | Topological descriptors     |
| 48 | n6HeteroRing | RingCountDescriptor                            | Number of 6-membered rings containing heteroatoms (N, O, P, S, or halogens)              | Constitutional descriptors  |
| 49 | ALogP2       | ALOGPDescriptor                                | Square of ALogP                                                                          | Constitutional descriptors  |
| 59 | VE3Dt        | DetourMatrixDescriptor                         | Logarithmic coefficient sum of the last eigenvector from detour matrix                   | Topological descriptors     |
| 51 | JGI10        | TopologicalChargeDescriptor                    | Mean topological charge index of order 10                                                | Topological descriptors     |
| 52 | JGI5         | TopologicalChargeDescriptor                    | Mean topological charge index of order 5                                                 | Topological descriptors     |
| 53 | AATS6e       | Average Broto-Moreau AutocorrelationDescriptor | Average Broto-Moreau autocorrelation - lag 6 / weighted by Sanderson electronegativities | Autocorrelation descriptors |
| 54 | khs.ssNH     | ElectrotopologicalStateAtomTypeDescriptor      | Count of atom-type E-State: -NH-                                                         | E-state descriptors         |
| 55 | khs.dssS     | ElectrotopologicalStateAtomTypeDescriptor      | Count of atom-type E-State: >S=                                                          | E-state descriptors         |
| 56 | AATS5e       | Average Broto-Moreau AutocorrelationDescriptor | Average Broto-Moreau autocorrelation - lag 5 / weighted by Sanderson electronegativities | Autocorrelation descriptors |

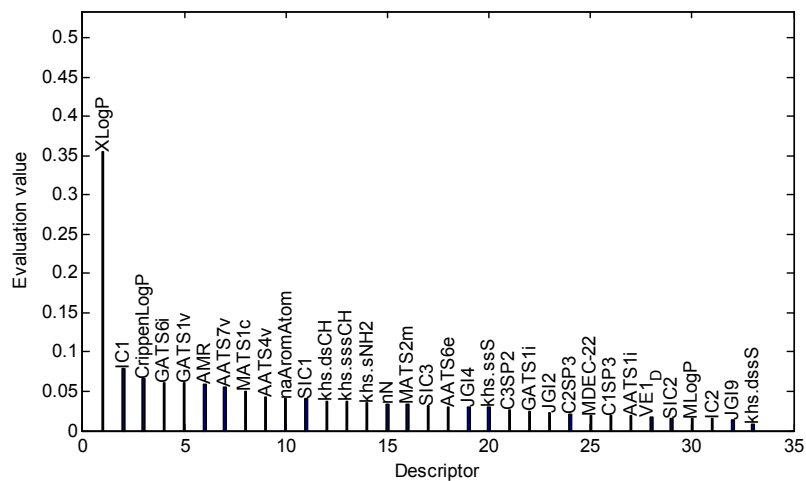

Fig. S1 Molecular descriptors selected for the BRF-based model No.4

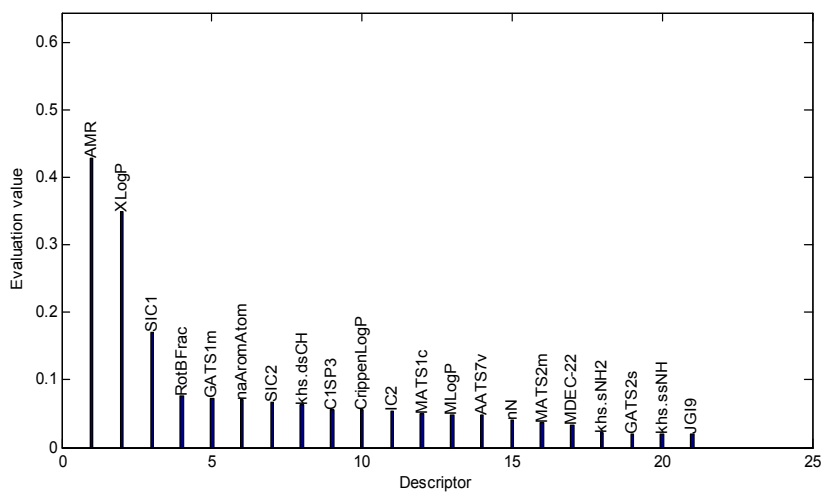

Fig.S2 Molecular descriptors selected for the RBF-based model No.5

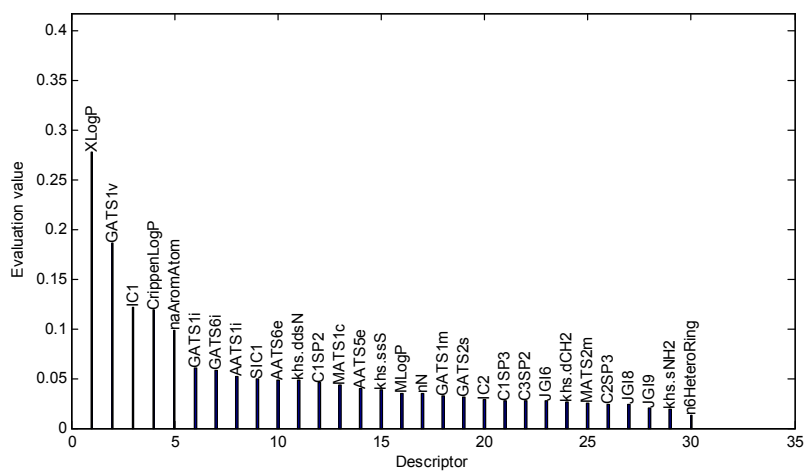

Fig. S3 Molecular descriptors selected for the RBF-based model No.6

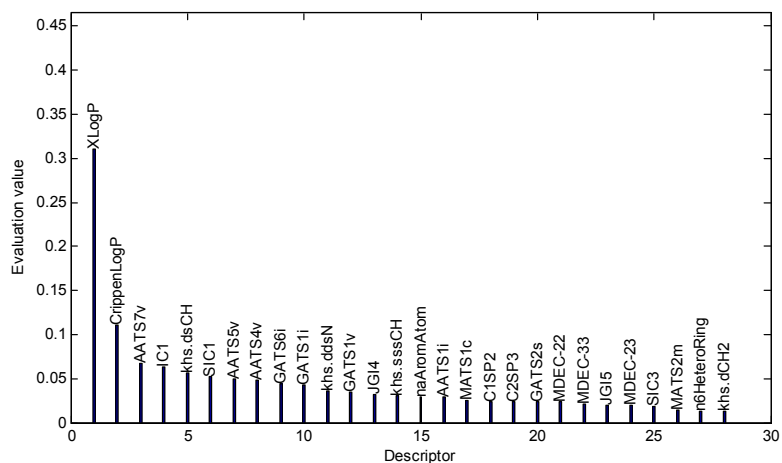

Fig. S4 Molecular descriptors selected for the RBF-based model No.7

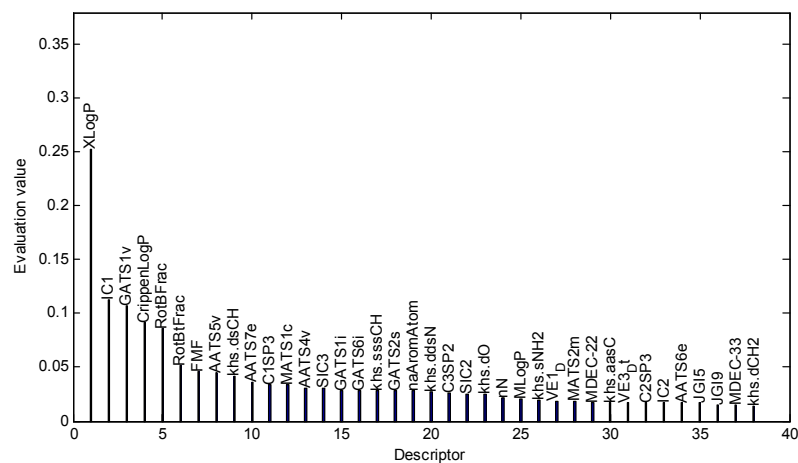

Fig.S5 Molecular descriptors selected for the RBF-based model No.8

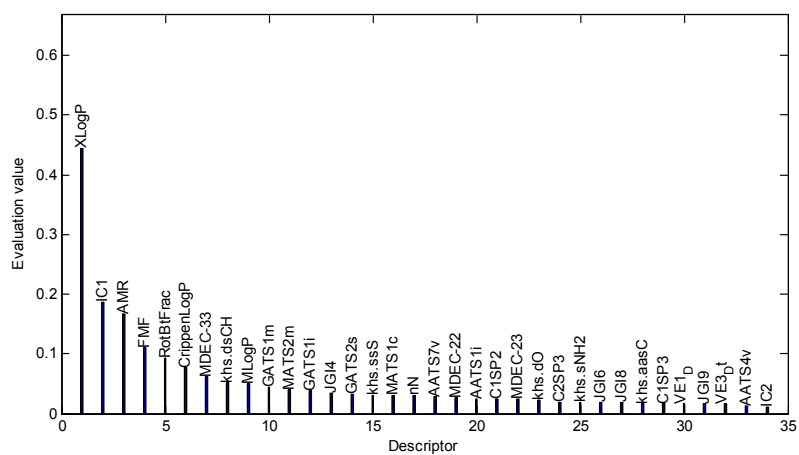

Fig. S6 Molecular descriptors selected for the RBF-based model No.9

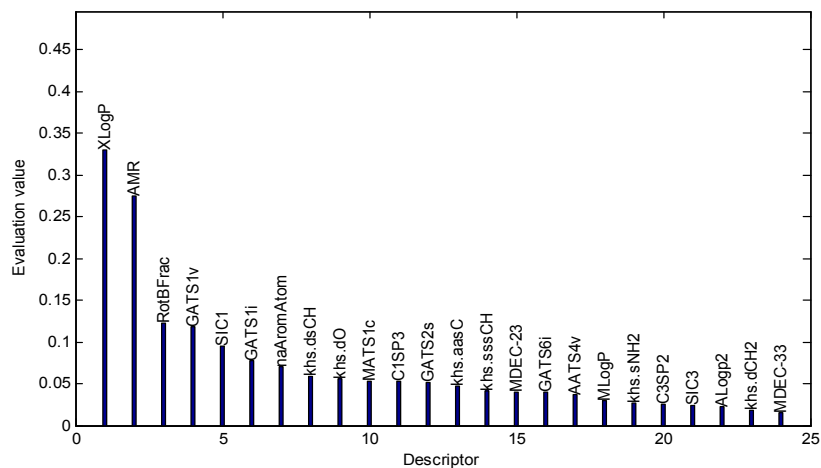

Fig. S7 Molecular descriptors selected for the RBF-based model No.10

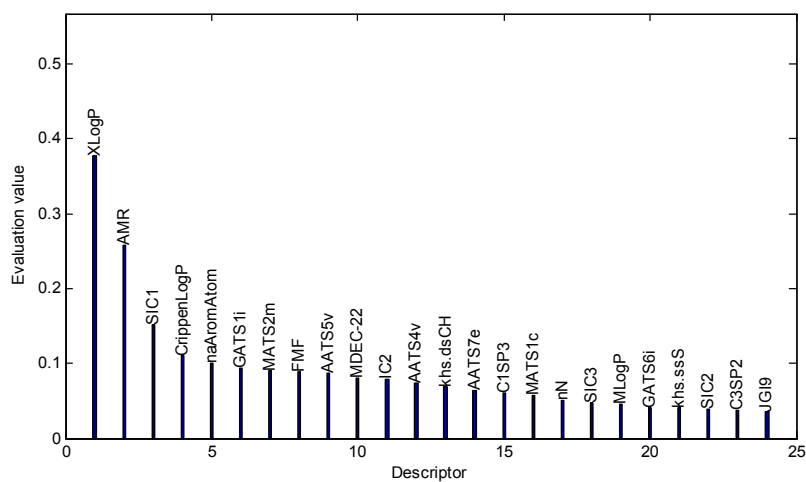

Fig. S8 Molecular descriptors selected for the RBF-based model No.11

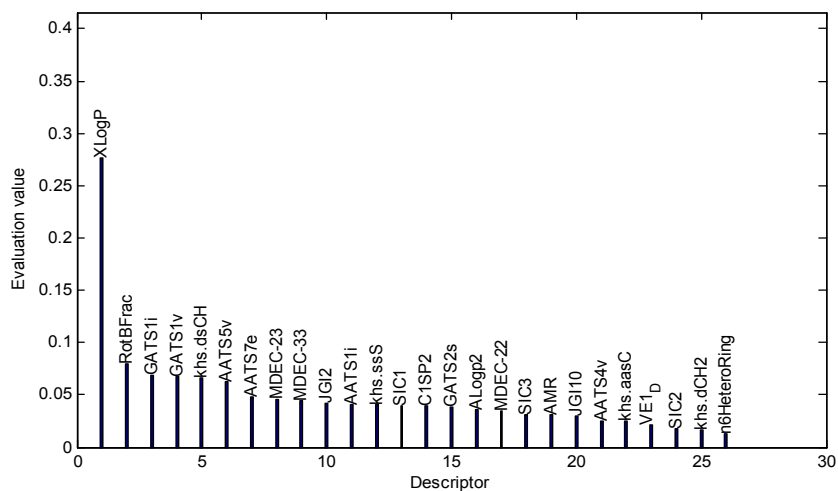

Fig.S9 Molecular descriptors selected for the RBF-based model No.12

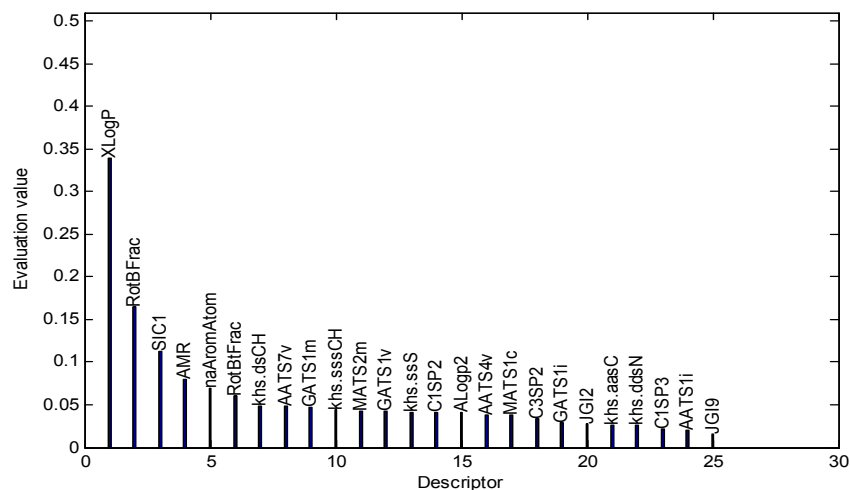

Fig. S10 Molecular descriptors selected for the RBF-based model No.13

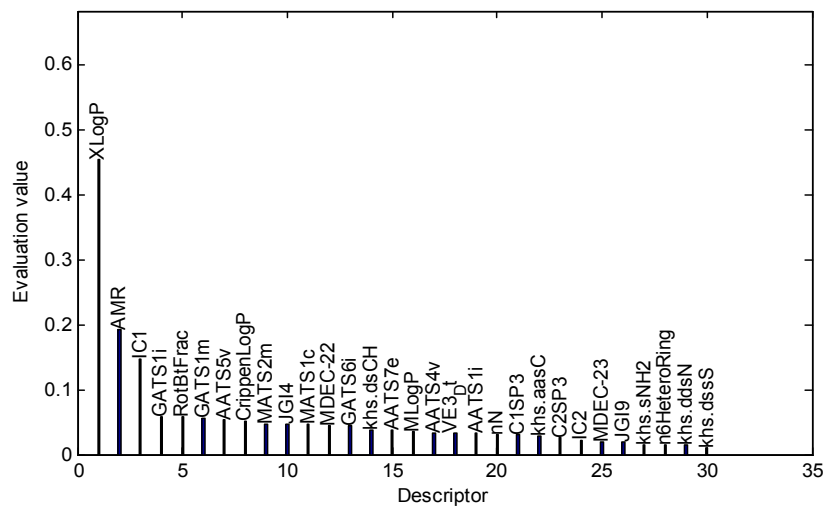

Fig. S11 Molecular descriptors selected for the RBF-based model No.14

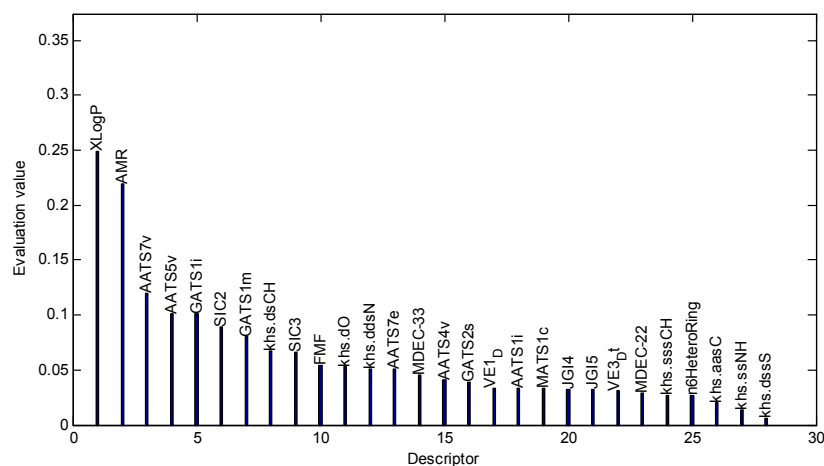

Fig. S12 Molecular descriptors selected for the RBF-based model No.15



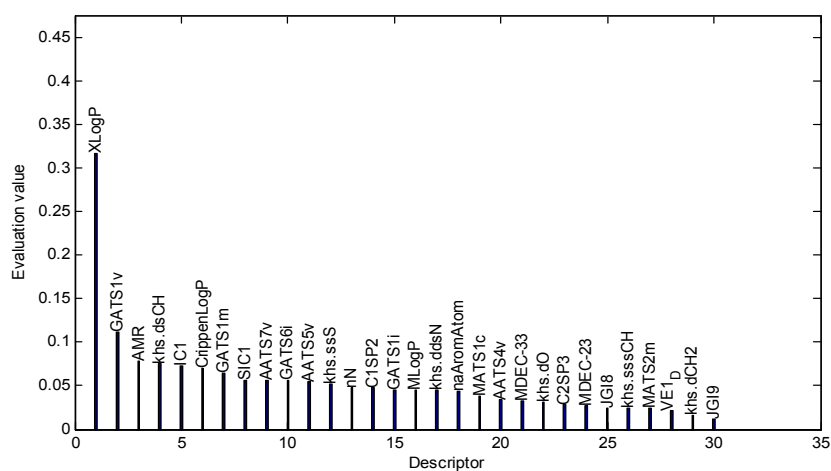

Fig. S13 Molecular descriptors selected for the RBF-based model No.16

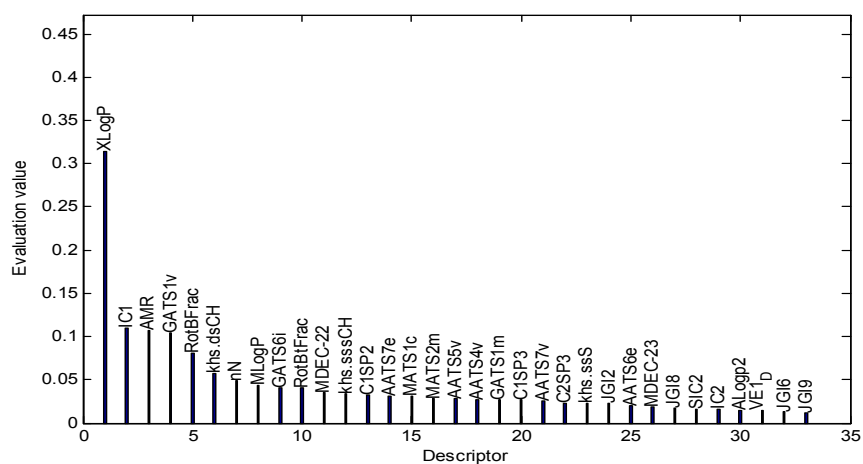

Fig. S14 Molecular descriptors selected for the RBF-based model No.17

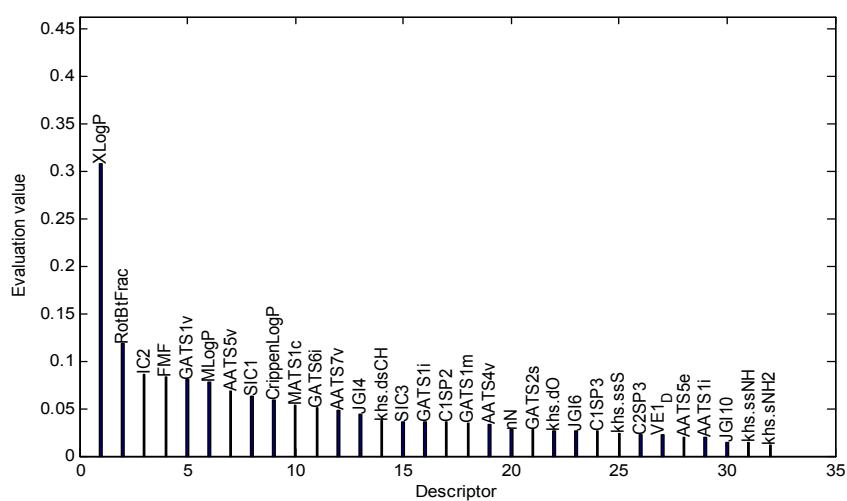

Fig.S15 Molecular descriptors selected for the RBF-based model No.18

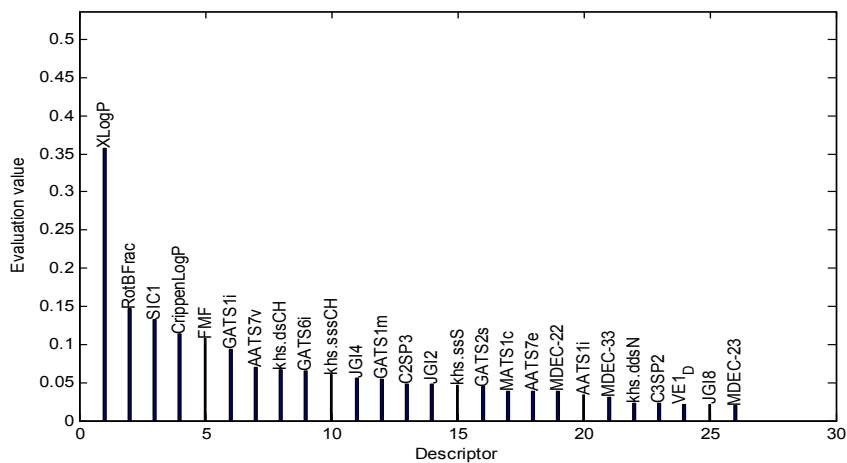

Fig. S16 Molecular descriptors selected for the RBF-based model No.19

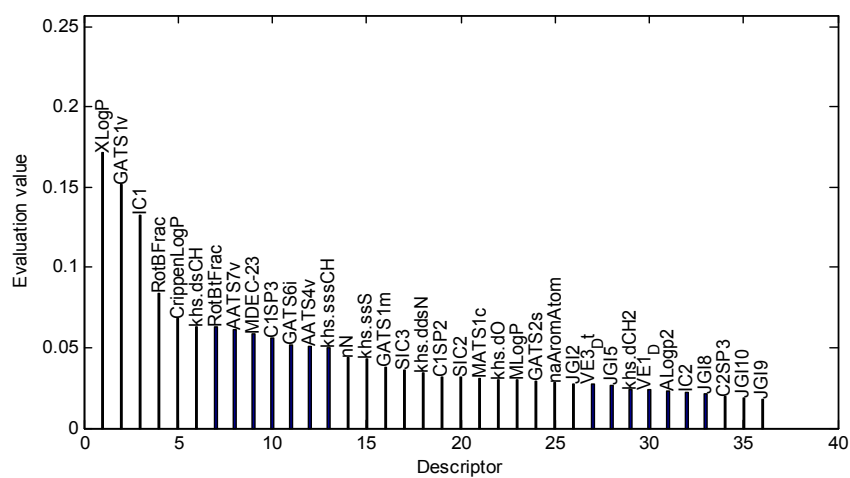

Fig. S17 Molecular descriptors selected for the RBF-based model No.20
