# Supplementary material for: A joint optimization QSAR model of fathead minnow acute toxicity based on a radial basis function neural network and its consensus modeling
Source: RSC Adv. 2020 Jun 4;10(36):21292–308. doi: 10.1039/d0ra02701d (PMC9054390; doi:10.1039/d0ra02701d)
Supplement: RA-010-D0RA02701D-s002 [file RA-010-D0RA02701D-s002.xlsx]

## Sheet: Data
CAS No.	SMILES	Name	Acute Toxicity：-logLC50（mol/l）	nAcid	ALogP	ALogp2	AMR	nA	nG	naAromAtom	nN	nO	nS	nP	nF	nCl	nBr	nI	nX	ATS0m	ATS8m	AATS1m	AATS3m	AATS4m	AATS5m	AATS6m	AATS7m	AATS8m	AATS4v	AATS5v	AATS6v	AATS7v	AATS0e	AATS3e	AATS4e	AATS5e	AATS6e	AATS7e	AATS0i	AATS1i	AATS3i	AATS4i	ATSC0c	ATSC1c	ATSC2c	ATSC3c	ATSC4c	ATSC5c	ATSC6c
67561	CO	Methyl alcohol	0.04	0	-0.358	0.128164	8.2613	0	0	0	0	1	0	0	0	0	0	0	0	404.296	0	48.9224	1.01606	0	0	0	0	0	0	0	0	0	7.96101	6.71846	0	0	0	0	175.319	159.579	184.918	0	0.212265	-0.0913558	-0.0476776	0.032901	0	0	0
107211	C(CO)O	Ethylene glycol	0.07	0	-0.8974	0.805327	14.5536	0	0	0	0	2	0	0	0	0	0	0	0	806.561	0	67.6972	23.5212	6.05304	1.01606	0	0	0	48.0604	31.0837	0	0	8.20952	7.94796	7.63603	6.71846	0	0	173.4	157.371	180.785	185.007	0.420116	-0.197558	-0.0939863	0.153528	-0.116072	0.0440296	0
111466	O(CCO)CCO	Diethylene glycol	0.15	0	-1.0283	1.0574	25.5971	0	0	0	0	3	0	0	0	0	0	0	0	1355.12	1.01606	74.1434	33.8105	31.7063	26.4803	23.5212	6.05304	1.01606	112.36	93.5302	68.1726	48.0604	8.08246	8.02937	7.48759	7.7203	7.94796	7.63603	171.336	153.894	174.79	167.056	0.585211	-0.229104	-0.206948	0.24752	-0.113434	-0.0724709	0.153863
57556	C([C@@H](C)O)O	Propylene glycol	0.24	0	-0.9081	0.824646	19.138	0	0	0	0	2	0	0	0	0	0	0	0	952.857	0	64.8127	27.0783	5.82971	1.01606	0	0	0	49.8783	31.0837	0	0	7.92867	7.95422	7.50528	6.71846	0	0	171.587	154.115	173.093	183.225	0.419616	-0.208656	-0.0626947	0.140965	-0.139676	0.0602536	0
112276	C(COCCO)OCCO	Triethylene glycol	0.34	0	-1.1592	1.34374	36.6406	0	0	0	0	4	0	0	0	0	0	0	0	1903.68	529.607	76.6659	37.2403	35.9818	30.2375	33.8105	31.7063	26.4803	123.077	100.904	99.9116	112.36	8.02952	8.05651	7.46285	7.74659	8.02937	7.48759	170.476	152.534	172.792	164.064	0.750311	-0.26063	-0.319852	0.340924	-0.114626	-0.164763	0.247855
67685	CS(=O)C	Dimethyl sulfoxide	0.36	0	-0.3166	0.100236	20.5586	0	0	0	0	1	1	0	0	0	0	0	0	1578.44	0	150.635	14.117	1.01606	0	0	0	0	31.0837	0	0	0	7.74874	8.2944	6.71846	0	0	0	165.588	143.681	169.153	184.918	0.0760427	-0.000995	0.00561074	-0.0548812	0.0122446	0	0
100970	C1N2CN3CN(CN1C3)C2	Methenamine	0.45	0	0.0858	0.00736164	36.9954	0	0	0	4	0	0	0	0	0	0	0	0	1662.56	0	90.1726	43.3333	10.9389	12.1071	1.01606	0	0	64.6634	114.737	31.0837	0	7.57596	7.44825	7.25067	7.11763	6.71846	0	173.852	158.39	155.23	186.664	0.340866	-0.136987	0.0970771	-0.0160567	-0.198017	0.04031	0.0432409
64175	CCO	Alcohol	0.5	0	-0.1076	0.0115778	12.5551	0	0	0	0	1	0	0	0	0	0	0	0	550.593	0	51.6363	5.71805	1.01606	0	0	0	0	31.0837	0	0	0	7.63817	7.4399	6.71846	0	0	0	172.061	153.867	182.335	184.918	0.212329	-0.0995233	-0.015584	-0.00695554	0.0158985	0	0
110805	C(OCC)CO	Ethylene glycol monoethyl ether	0.53	0	-0.2385	0.0568823	23.5986	0	0	0	0	2	0	0	0	0	0	0	0	1099.15	0	66.0074	27.0412	25.9786	16.1695	5.71805	1.01606	0	112.633	77.1586	50.7873	31.0837	7.75313	7.81262	7.30084	7.30877	7.4399	6.71846	170.454	151.794	174.813	164.052	0.377123	-0.131535	-0.126202	0.104406	-0.0487609	0.00379695	-0.0061796
87729	O[C@H]1[C@@H]([C@@H](OC[C@H]1O)O)O	L-Arabinopyranose	0.6	0	-2.0027	4.01081	29.9609	0	0	0	0	5	0	0	0	0	0	0	0	2011.32	0	93.3595	64.8211	36.7908	16.728	4.7938	1.01606	0	96.8514	64.2184	43.8162	31.0837	8.58229	8.58285	8.40665	7.92606	7.40664	6.71846	170.52	154.335	167.816	175.786	0.990597	-0.506271	-0.222546	0.45741	-0.235376	-0.0216208	-0.011705
111900	C(COCC)OCCO	Diethylene glycol monoethyl ether	0.71	0	-0.3694	0.136456	34.6421	0	0	0	0	3	0	0	0	0	0	0	0	1647.71	307.221	71.2332	33.1336	33.2463	25.181	27.0412	25.9786	16.1695	124.2	92.9121	95.7114	112.633	7.79812	7.91911	7.35873	7.54152	7.81262	7.30084	169.825	151.04	172.664	162.153	0.542222	-0.163062	-0.239125	0.197659	-0.0503961	-0.0861552	0.105183
68122	N(C=O)(C)C	Dimethylformamide	0.84	0	-0.4991	0.249101	20.1873	0	0	0	1	1	0	0	0	0	0	0	0	892.069	0	71.0571	34.6142	5.33347	0	0	0	0	45.6351	0	0	0	7.76701	7.48216	7.50495	0	0	0	172.625	156.016	153.15	184.994	0.205678	-0.076728	-0.0474226	0.0456413	-0.0243298	0	0
67630	C(C)(C)O	Isopropyl alcohol	0.84	0	-0.4081	0.166546	17.7599	0	0	0	0	1	0	0	0	0	0	0	0	696.889	0	52.8699	9.55862	1.01606	0	0	0	0	31.0837	0	0	0	7.47675	7.65701	6.71846	0	0	0	170.431	151.27	172.881	184.918	0.211498	-0.108781	0.026212	-0.0612585	0.0380789	0	0
77714	CC1(C(=O)NC(=O)N1)C	5,5-Dimethylhydantoin	0.89	0	-0.1571	0.0246804	28.6521	2	1	0	2	2	0	0	0	0	0	0	0	1633.78	0	93.5855	58.5127	23.7753	8.57153	0	0	0	83.3244	56.5487	0	0	8.15041	8.1889	7.84568	8.09482	0	0	170.982	156.219	165.735	178.948	0.415071	-0.362755	0.335665	-0.224257	0.0620594	-0.0182476	0
100798	O1[C@@H](COC1(C)C)CO	2,2-Dimethyl-1,3-dioxolane-4-methanol	0.9	0	-0.6731	0.453064	32.7231	0	0	0	0	3	0	0	0	0	0	0	0	1645.68	0	80.342	39.7282	24.6766	16.2928	6.65844	1.01606	0	105.02	75.625	54.728	31.0837	7.90094	8.2948	7.48526	7.12359	7.58419	6.71846	168.387	149.687	167.666	166.426	0.509669	-0.252092	0.0188198	-0.0516605	0.00984434	0.0358836	-0.0514455
67641	C(C)(C)=O	Acetone	0.91	0	-0.244	0.059536	16.1948	0	0	0	0	1	0	0	0	0	0	0	0	694.857	0	61.4816	14.117	1.01606	0	0	0	0	31.0837	0	0	0	7.6284	8.2944	6.71846	0	0	0	167.534	147.296	169.153	184.918	0.111677	-0.0405779	0.0328448	-0.0566973	0.00859173	0	0
123911	C1COCCO1	1,4-Dioxane	0.93	0	-0.2618	0.0685392	22.087	0	0	0	0	2	0	0	0	0	0	0	0	1097.12	0	82.4315	28.8332	6.56158	1.01606	0	0	0	72.9102	31.0837	0	0	7.90094	7.95892	6.91805	6.71846	0	0	168.387	149.424	171.29	169.02	0.330199	-0.063052	-0.225807	0.0354926	0.0607081	0.0275595	0
107415	C(C[C@@H](C)O)(C)(C)O	Hexylene glycol	1.04	0	-0.07	0.0049	32.6456	0	0	0	0	2	0	0	0	0	0	0	0	1391.75	0	61.1042	26.6619	22.2525	11.0944	1.01606	0	0	79.8092	86.0844	31.0837	0	7.54568	7.80983	7.15456	7.81747	6.71846	0	169.114	149.928	163.496	174.526	0.417027	-0.221903	0.0742757	-0.203361	0.306181	-0.268532	0.104825
109875	C(OC)OC	Methylal	1.04	0	-0.0981	0.00962361	18.8655	0	0	0	0	2	0	0	0	0	0	0	0	952.857	0	72.1261	42.1166	13.3273	12.1071	1.01606	0	0	67.8212	114.737	31.0837	0	7.92867	7.60367	7.631	7.11763	6.71846	0	171.587	153.196	153.159	181.943	0.312838	-0.0945997	-0.0750705	0.0322129	-0.0562909	0.0122657	0.0250632
4839467	C(CC(O)=O)(CC(O)=O)(C)C	3,3-Dimethylglutarate	1.06	2	0.5042	0.254218	37.1617	0	0	0	0	4	0	0	0	0	0	0	0	2045.91	1.01606	81.253	41.9796	37.6364	32.3181	48.3792	16.127	1.01606	102.722	107.709	72.3807	82.0136	8.12226	7.84336	7.38224	9.18854	7.9608	9.47117	167.321	148.897	156.267	170.899	0.612595	-0.438026	0.271677	-0.219878	0.331354	-0.603468	0.567158
75650	CC(C)(C)O	t-Butyl alcohol	1.06	0	0.5733	0.328673	22.0651	0	0	0	0	1	0	0	0	0	0	0	0	843.185	0	53.5748	13.3131	1.01606	0	0	0	0	31.0837	0	0	0	7.37989	7.82369	6.71846	0	0	0	169.454	149.787	162.741	184.918	0.209745	-0.11912	0.0781274	-0.130812	0.0669317	0	0
126818	C1(CC(CC(C1)=O)=O)(C)C	5,5-Dimethyl-1,3-cyclohexanedione	1.09	0	0.491	0.241081	37.9643	0	0	0	0	2	0	0	0	0	0	0	0	1678.24	0	76.533	41.5367	27.2379	14.5809	1.01606	0	0	88.1087	94.5994	31.0837	0	7.62041	7.70454	7.2095	8.56596	6.71846	0	163.83	143.569	154.405	172.731	0.241699	-0.0613938	0.0152129	-0.203678	0.24433	-0.127372	0.0120516
102716	N(CCO)(CCO)CCO	Trolamine	1.1	0	-1.2981	1.68506	38.865	0	0	0	1	3	0	0	0	0	0	0	0	1844.93	3.04819	71.1527	35.5417	35.8702	26.4803	23.5212	6.05304	1.01606	123.352	93.5302	68.1726	48.0604	7.85107	7.67505	7.39661	7.7203	7.94796	7.63603	172.085	155.184	171.794	164.756	0.729383	-0.305335	-0.216316	0.277991	-0.10175	-0.21861	0.419352
71238	C(CO)C	n-Propanol	1.12	0	-0.6854	0.469773	16.0871	0	0	0	0	1	0	0	0	0	0	0	0	696.889	0	52.8699	14.7263	5.71805	1.01606	0	0	0	50.7873	31.0837	0	0	7.47675	7.25255	7.4399	6.71846	0	0	170.431	151.27	174.355	182.335	0.217026	-0.100886	-0.0265674	0.0253235	-0.0209072	0.0145238	0
149315	C([C@@H]([C@@H](CC)O)C)O	2-Methyl-1,3-pentanediol	1.13	0	-1.0627	1.12933	30.5849	0	0	0	0	2	0	0	0	0	0	0	0	1391.75	0	61.1042	34.1519	21.6376	10.1752	3.58078	1.01606	0	93.2824	66.3028	41.8311	31.0837	7.54568	7.47995	7.67791	7.17361	7.11198	6.71846	169.114	149.928	164.708	171.651	0.428349	-0.208224	-0.0391207	0.0327343	0.0458649	-0.0882527	0.0282928
383631	C(C(F)(F)F)(OCC)=O	Ethyl trifluoroacetate	1.15	0	1.3597	1.84878	22.7168	0	0	0	0	2	0	0	3	0	0	0	3	2176.89	0	123.856	119.156	92.8156	58.9449	19.1504	0	0	190.453	123.789	74.1835	0	9.88984	9.78852	8.75474	9.66176	10.368	0	193.809	159.061	190.091	167.056	0.615832	-0.279163	-0.28854	0.296763	0.0173973	-0.0177732	-0.0366013
110883	C1OCOCO1	1,3,5-Trioxane	1.18	0	-0.4458	0.198738	17.559	0	0	0	0	3	0	0	0	0	0	0	0	1206.79	0	102.136	48.1185	6.05304	0	0	0	0	48.0604	0	0	0	8.58229	7.70088	7.63603	0	0	0	170.52	153.233	153.167	185.007	0.440485	-0.220568	0.0703024	0.0106373	-0.0806143	0	0
111966	O(CCOC)CCOC	Diethylene glycol dimethyl ether	1.2	0	-0.2113	0.0446477	35.0995	0	0	0	0	3	0	0	0	0	0	0	0	1647.71	253.219	73.2278	38.7677	29.4129	23.7599	34.959	21.5663	13.3273	107.616	88.2434	126.818	88.5763	7.79812	7.94526	7.26382	7.70264	7.82703	7.16107	169.825	150.789	166.184	165.514	0.49906	-0.0797633	-0.331481	0.198794	0.0386207	-0.175696	0.105606
51796	O(C(N)=O)CC	Urethane	1.23	0	0.2687	0.0721997	18.7833	0	0	0	1	2	0	0	0	0	0	0	0	1148.04	0	81.4806	35.9925	43.7663	9.91805	1.01606	0	0	139.58	71.729	31.0837	0	8.1966	8.17719	8.17207	7.86326	6.71846	0	173.611	159.281	175.324	168.024	0.372134	-0.346268	0.314858	-0.159437	0.00385372	-0.0186943	0.0196209
16079882	CC1(C(=O)N(C(=O)N1Br)Cl)C	1-Bromo-3-chloro-5,5-dimethylhydantoin	1.23	0	1.476	2.17858	42.8668	2	1	0	2	2	0	0	0	1	1	0	2	9273.1	0	186.969	253.334	158.734	25.9303	0	0	0	140.016	103.587	0	0	8.67986	8.7607	8.37966	9.23918	0	0	167.329	154.154	161.844	173.552	0.34739	-0.208581	0.0857936	-0.107952	0.103352	-0.0463075	0
512561	P(=O)(OC)(OC)OC	Trimethyl phosphate	1.3	0	0.2082	0.0433472	28.0988	0	0	0	0	4	0	1	0	0	0	0	0	2425.18	0	166.728	111.693	28.9407	12.1071	1.01606	0	0	116.164	114.737	31.0837	0	8.40117	8.27638	9.2781	7.11763	6.71846	0	170.378	150.585	147.973	179.345	0.53375	-0.508304	0.390522	0.102496	-0.376024	0.0469279	0.0775072
103764	N1(CCNCC1)CCO	1-(2-Hydroxyethyl)piperazine	1.31	0	-0.7979	0.636644	37.0358	0	0	0	2	1	0	0	0	0	0	0	0	1528.17	1.01606	71.3773	29.9587	22.3067	18.2472	15.3079	4.5428	1.01606	101.603	78.1038	62.9511	44.4353	7.5242	7.45638	7.15295	7.33677	7.56353	7.2576	172.067	155.318	171.133	167.214	0.432116	-0.148435	-0.178701	0.123391	-0.0204264	-0.0514846	0.0971522
78922	CCC(C)O	sec-Butyl alcohol	1.31	0	-0.6961	0.484555	20.6715	0	0	0	0	1	0	0	0	0	0	0	0	843.185	0	53.5748	18.7478	6.13981	1.01606	0	0	0	61.8487	31.0837	0	0	7.37989	7.46153	7.17898	6.71846	0	0	169.454	149.787	170.314	175.677	0.216197	-0.110451	0.0140425	-0.0203791	-0.0111799	0.0198683	0
111773	C(OCCO)COC	Diethylene glycol monomethyl ether	1.32	0	-0.6198	0.384152	30.3483	0	0	0	0	3	0	0	0	0	0	0	0	1501.42	66.5844	73.6133	36.5144	30.2156	24.698	30.1933	18.4637	6.65844	109.277	90.0664	102.382	80.4731	7.91896	7.98349	7.34214	7.70873	7.87742	7.25606	170.467	152.097	170.096	166.054	0.542136	-0.154434	-0.269215	0.223156	-0.0374133	-0.12408	0.13016
111422	N(CCO)CCO	Diolamine	1.35	0	-1.2946	1.67599	27.278	0	0	0	1	2	0	0	0	0	0	0	0	1296.37	1.01606	67.7978	26.9673	25.8568	24.1654	23.5212	6.05304	1.01606	98.4383	87.8532	68.1726	48.0604	7.83168	7.6072	7.43226	7.62922	7.94796	7.63603	173.523	157.681	176.789	171.968	0.539616	-0.241253	-0.142865	0.221445	-0.150807	-0.0224496	0.139473
78933	C(CC)(C)=O	Methyl ethyl ketone	1.35	0	-0.1678	0.0281568	21.2183	0	0	0	0	1	0	0	0	0	0	0	0	841.153	0	60.1511	24.7627	8.47466	1.01606	0	0	0	74.7309	31.0837	0	0	7.48165	7.72296	7.42867	6.71846	0	0	167.075	146.559	168.597	172.253	0.116735	-0.0437194	0.0160187	-0.0166408	-0.0205497	0.00652368	0
75058	C(C)#N	Acetonitrile	1.4	0	0.0446	0.00198916	11.623	0	0	0	1	0	0	0	0	0	0	0	0	487.772	0	69.7647	14.1191	0	0	0	0	0	0	0	0	0	7.57301	8.27885	0	0	0	0	169.93	149.964	197.641	0	0.0873616	-0.0218331	0.00926362	-0.0311113	0	0	0
115195	C(C#C)(C)(C)O	2-Methyl-3-butyn-2-ol	1.41	0	0.8987	0.807662	24.0968	0	0	0	0	1	0	0	0	0	0	0	0	985.417	0	66.9305	30.8467	5.61327	1.01606	0	0	0	63.236	31.0837	0	0	7.48586	7.83296	6.97227	6.71846	0	0	164.197	147.505	158.72	173.482	0.241446	-0.149856	0.0763095	-0.037509	-0.0556795	0.0460122	0
60297	O(CC)CC	Ether	1.46	0	0.5513	0.303932	21.6001	0	0	0	0	1	0	0	0	0	0	0	0	843.185	0	56.7091	18.5796	17.96	4.71307	1.01606	0	0	113.015	58.968	31.0837	0	7.37989	7.54167	7.03938	6.85152	6.71846	0	169.454	149.393	174.842	159.846	0.169062	-0.0338031	-0.0442756	-0.0345785	0.0116822	0.0106926	0.00575133
141435	C(CO)N	Ethanolamine	1.47	0	-1.187	1.40897	16.2111	0	0	0	1	1	0	0	0	0	0	0	0	747.805	0	59.746	18.3929	5.82994	1.01606	0	0	0	48.6107	31.0837	0	0	7.7876	7.53936	7.50355	6.71846	0	0	176.791	163.675	181.785	186.391	0.349195	-0.178981	-0.0575618	0.128583	-0.116308	0.0496695	0
78966	C([C@@H](C)O)N	1-Amino-2-propanol	1.47	0	-1.1977	1.43449	20.7955	0	0	0	1	1	0	0	0	0	0	0	0	894.101	0	58.9183	22.4524	6.0073	1.01606	0	0	0	54.5454	31.0837	0	0	7.61722	7.6785	7.31586	6.71846	0	0	174.381	159.215	174.534	184.338	0.348505	-0.189629	-0.0220809	0.10889	-0.139383	0.0679511	0
109999	C1CCOC1	Tetrahydrofuran	1.52	0	-0.7069	0.499708	16.8667	0	0	0	0	1	0	0	0	0	0	0	0	841.153	0	70.3059	7.92806	1.01606	0	0	0	0	31.0837	0	0	0	7.48165	7.28278	6.71846	0	0	0	167.075	147.081	171.329	184.918	0.166862	-0.0302901	-0.061107	-0.017764	0.0257302	0	0
107120	C(C#N)C	Propionitrile	1.56	0	0.1208	0.0145926	16.6465	0	0	0	1	0	0	0	0	0	0	0	0	634.069	0	64.6627	19.9078	14.1191	0	0	0	0	86.9662	0	0	0	7.3795	7.24934	8.27885	0	0	0	168.468	147.857	177.318	197.641	0.091938	-0.0277144	-0.00481295	0.00552091	-0.0189625	0	0
15892236	CCC(C)O	sec-Butyl alcohol	1.59	0	-0.6961	0.484555	20.6715	0	0	0	0	1	0	0	0	0	0	0	0	843.185	0	53.5748	18.7478	6.13981	1.01606	0	0	0	61.8487	31.0837	0	0	7.37989	7.46153	7.17898	6.71846	0	0	169.454	149.787	170.314	175.677	0.216197	-0.110451	0.0140425	-0.0203791	-0.0111799	0.0198683	0
71363	C(CC)CO	Butyl alcohol	1.63	0	-0.9734	0.947508	18.9987	0	0	0	0	1	0	0	0	0	0	0	0	843.185	0	53.5748	16.867	14.7263	5.71805	1.01606	0	0	72.7705	50.7873	31.0837	0	7.37989	7.17295	7.25255	7.4399	6.71846	0	169.454	149.787	171.347	174.355	0.221464	-0.100614	-0.0301589	0.0164326	0.0113229	-0.0221909	0.0144761
109013	N1(CCNCC1)C	1-Methylpiperazine	1.64	0	-0.2585	0.0668222	30.7435	0	0	0	2	0	0	0	0	0	0	0	0	1125.91	0	67.2114	25.3453	9.6516	3.11606	1.01606	0	0	73.1647	41.5546	31.0837	0	7.30144	7.32375	6.96387	6.93014	6.71846	0	172.393	155.467	168.467	171.717	0.225443	-0.0444695	-0.137953	0.0302673	0.0276377	-0.00250381	0.0143
109079	C1NC[C@@H](NC1)C	2-Methylpiperazine	1.65	0	-0.8051	0.648186	30.0332	0	0	0	2	0	0	0	0	0	0	0	0	1125.91	0	66.0555	24.177	9.62451	3.65678	1.01606	0	0	73.9943	51.0011	31.0837	0	7.30144	7.35162	7.05537	6.8135	6.71846	0	172.393	155.87	172.78	174.97	0.243209	-0.0913732	-0.0804546	0.0458998	-0.0405683	0.0384744	0.00641747
5217470	CCN1C(=O)CC(=O)N(C1=S)CC	1,3-Diethyl-2-thiobarbituric acid	1.65	0	0.7646	0.584613	52.3467	0	0	0	2	2	1	0	0	0	0	0	0	3098.48	9.14458	100.047	85.2877	94.9798	31.2971	20.5916	7.56655	1.01606	196.318	129.172	94.6194	64.7294	7.87185	7.97791	8.16119	7.6906	7.35565	7.50643	165.363	149.998	165.273	155.783	0.374205	-0.219179	0.202103	-0.361084	0.237968	-0.0443005	0.0276203
622402	N1(CCOCC1)CCO	2-Morpholinoethanol	1.69	0	-0.5316	0.282599	35.3549	0	0	0	1	2	0	0	0	0	0	0	0	1586.93	0	76.155	33.6334	24.75	19.0398	18.5303	4.03825	0	107.404	76.5964	62.4262	41.2697	7.70401	7.64987	7.19202	7.4267	7.85884	7.269	170.311	152.456	169.52	164.89	0.474122	-0.139722	-0.233803	0.115981	0.0226708	-0.075544	0.104294
78831	C(CO)(C)C	Isobutyl alcohol	1.72	0	0.1242	0.0154256	21.5446	0	0	0	0	1	0	0	0	0	0	0	0	843.185	0	53.5748	20.5479	4.77765	1.01606	0	0	0	46.8466	31.0837	0	0	7.37989	7.25744	7.29562	6.71846	0	0	169.454	149.787	164.804	182.851	0.221004	-0.10339	-0.0293767	0.0463221	-0.0534396	0.0293823	0
96220	CCC(=O)CC	3-Pentanone	1.75	0	-0.0916	0.00839056	26.2418	0	0	0	0	1	0	0	0	0	0	0	0	987.449	0	59.3528	29.0209	17.4362	4.71307	1.01606	0	0	104.157	58.968	31.0837	0	7.38993	7.49438	7.73418	6.85152	6.71846	0	166.787	146.116	168.375	167.086	0.121815	-0.0468518	-0.00114821	0.0222862	-0.0415553	0.00141182	0.00495005
111693	C(CCC#N)CC#N	Adiponitrile	1.75	0	-0.437	0.190969	27.3188	0	0	0	2	0	0	0	0	0	0	0	0	1266.11	0	76.9769	29.7946	32.7694	39.3139	65.4921	196.196	0	125.145	133.112	164.981	243.314	7.46213	7.25186	7.35111	7.56945	8.44281	10.2016	166.412	145.751	168.326	169.825	0.181834	-0.0488366	-0.0164147	-0.00828981	0.0312456	-0.0118377	-0.105748
140318	N1(CCNCC1)CCN	N-(2-Aminoethyl)piperazine	1.77	0	-1.0875	1.18266	38.6933	0	0	0	3	0	0	0	0	0	0	0	0	1469.41	2.03213	67.911	28.1645	20.5456	16.7654	11.9912	4.03983	1.01606	99.4759	80.922	63.2767	43.9797	7.35937	7.36191	7.11243	7.16864	7.21317	7.07855	173.677	158.03	171.929	168.758	0.362042	-0.12837	-0.1454	0.108236	-0.0351115	-0.0375525	0.0906977
110736	C(NCC)CO	N-Ethylaminoethanol	1.78	0	-0.5048	0.254823	25.2795	0	0	0	1	1	0	0	0	0	0	0	0	1040.4	0	59.7736	21.7116	20.2839	15.4119	5.71805	1.01606	0	94.574	74.8549	50.7873	31.0837	7.50697	7.40628	7.22026	7.27926	7.4399	6.71846	172.821	155.949	176.989	169.798	0.335627	-0.141775	-0.0844685	0.0953582	-0.0643225	0.0257724	-0.0136482
693936	n1c(coc1)C	4-Methyloxazole	1.78	0	-0.0623	0.00388129	23.5217	0	0	5	1	1	0	0	0	0	0	0	0	1034.3	0	97.2607	36.7426	9.17033	1.01606	0	0	0	75.3929	31.0837	0	0	7.93707	7.73179	7.61435	6.71846	0	0	166.223	150.291	164.812	173.429	0.197728	-0.0853202	-0.0170971	-0.00739469	0.00106139	0.00988655	0
109762	C(CN)CN	Trimethylenediamine	1.79	0	-1.7646	3.11381	20.7802	0	0	0	2	0	0	0	0	0	0	0	0	835.345	0	53.8659	16.8689	14.9187	5.38373	1.01606	0	0	67.7681	49.7112	31.0837	0	7.3473	7.16978	7.25758	7.23859	6.71846	0	176.803	163.586	176.718	182.538	0.283288	-0.154496	-0.0128493	0.000954	0.0849338	-0.116085	0.055898
96413	C1CCC(C1)O	Cyclopentanol	1.8	0	-1.6627	2.76457	17.6089	0	0	0	0	1	0	0	0	0	0	0	0	987.449	0	64.911	16.4709	4.19398	1.01606	0	0	0	45.3539	31.0837	0	0	7.38993	7.31439	7.17266	6.71846	0	0	166.787	146.913	168.685	182.513	0.217566	-0.10683	-0.00081	-0.000869	-0.0226992	0.0224244	0
7209383	N1(CCN(CC1)CCCN)CCCN	1,4-Piperazinedipropanamine	1.81	0	-1.9566	3.82828	57.761	0	0	0	4	0	0	0	0	0	0	0	0	2251.81	851.151	66.0555	30.3643	24.7047	23.0293	22.9862	17.7522	19.3443	110.618	100.03	100.3	83.4141	7.30144	7.31694	7.17706	7.13948	7.2667	7.2191	172.393	155.87	168.948	168.071	0.488811	-0.165815	-0.155134	-0.0169793	0.177635	-0.091024	-0.0996089
280579	N12CCN(CC1)CC2	Triethylenediamine	1.81	0	0.096	0.009216	34.0692	0	0	0	2	0	0	0	0	0	0	0	0	1270.17	0	75.5955	27.8904	6.56158	1.01606	0	0	0	72.9102	31.0837	0	0	7.3134	7.3861	6.91805	6.71846	0	0	170.113	152.372	167.957	169.02	0.202402	-0.0144626	-0.159852	-0.0317995	0.0586511	0.0462621	0
100378	N(CCO)(CC)CC	Diethylaminoethanol	1.82	0	0.2815	0.0792423	34.868	0	0	0	1	1	0	0	0	0	0	0	0	1332.99	0	59.7862	29.3869	24.6763	12.4871	4.43569	1.01606	0	116.891	71.3117	45.4136	31.0837	7.37276	7.40726	7.17334	7.1618	7.24315	6.71846	170.923	152.436	171.444	161.687	0.320882	-0.107196	-0.0955437	0.0560179	-0.0286057	0.00601822	-0.0216827
112072	C(OCCCC)COC(C)=O	Ethylene glycol monobutyl ether acetate	1.82	0	-0.7252	0.525915	39.1937	0	0	0	0	3	0	0	0	0	0	0	0	1938.27	658.27	72.1482	33.1139	33.8294	29.6455	29.8617	29.7603	24.3804	123.098	103.908	113.81	115.607	7.69906	7.78251	7.49006	7.59212	7.49707	7.52099	167.755	148.102	169.315	164.129	0.42942	-0.188292	-0.0235006	0.0368011	-0.0877837	0.0603124	-0.0145083
107879	CCCC(=O)C	Methyl propyl ketone	1.84	0	-0.4558	0.207754	24.1299	0	0	0	0	1	0	0	0	0	0	0	0	987.449	0	59.3528	23.8924	19.9055	8.47466	1.01606	0	0	90.8821	74.7309	31.0837	0	7.38993	7.50223	7.25331	7.42867	6.71846	0	166.787	146.116	167.317	170.604	0.121455	-0.0431931	0.0106565	-0.0314825	0.0190331	-0.0221488	0.00640744
78900	C([C@@H](C)N)N	1,2-Diaminopropane	1.87	0	-1.4873	2.21206	22.453	0	0	0	2	0	0	0	0	0	0	0	0	835.345	0	53.8659	19.7834	5.23469	1.01606	0	0	0	51.7683	31.0837	0	0	7.3473	7.36142	7.15258	6.71846	0	0	176.803	163.586	175.973	185.861	0.281389	-0.165165	0.00147209	0.0845118	-0.135121	0.0736083	0
554121	C(=O)(CC)OC	Methyl propionate	1.89	0	0.0973	0.00946729	22.4363	0	0	0	0	2	0	0	0	0	0	0	0	1097.12	0	73.9905	43.2001	23.3295	6.56158	1.01606	0	0	115.688	72.9102	31.0837	0	7.90094	7.92717	8.55795	6.91805	6.71846	0	168.387	149.123	167.79	170.604	0.259517	-0.155264	0.0418221	0.0445161	-0.0780834	0.00596917	0.0112813
685916	N(C(C)=O)(CC)CC	N,N-Diethylacetamide	1.89	0	0.0805	0.00648025	32.8469	0	0	0	1	1	0	0	0	0	0	0	0	1330.96	0	64.3531	38.3604	30.7815	7.06406	1.01606	0	0	136.194	68.8198	31.0837	0	7.43507	7.64492	7.50016	7.21224	6.71846	0	169.59	150.765	171.144	157.658	0.198665	-0.110888	0.0694432	-0.0620402	0.0125674	-0.0279083	0.0194935
62759	N(N=O)(C)C	N-Nitrosodimethylamine	1.9	0	0.0908	0.00824464	20.0505	0	0	0	2	1	0	0	0	0	0	0	0	942.985	0	82.9413	38.6918	7.06044	0	0	0	0	51.4557	0	0	0	8.10425	8.0319	7.81955	0	0	0	179.184	165.522	172.233	185.024	0.0567595	-0.00938349	-0.00891031	0.00677321	-0.0168592	0	0
105602	C1(CCCCCN1)=O	Caprolactam	1.91	0	-1.4524	2.10947	25.4377	0	0	0	1	1	0	0	0	0	0	0	0	1328.93	0	72.9027	34.2923	16.8067	4.03825	0	0	0	87.3631	41.2697	0	0	7.5105	7.42097	7.42456	7.269	0	0	167.976	149.658	167.285	171.656	0.220273	-0.140357	0.0720302	-0.0325199	-0.00759083	-0.00169912	0
76039	C(C(=O)O)(Cl)(Cl)Cl	Trichloroacetic acid	1.91	1	1.4484	2.09786	28.1583	0	0	0	0	2	0	0	0	3	0	0	3	4571.59	0	260.298	428.903	35.7336	0	0	0	0	125.161	0	0	0	10.5912	11.5968	9.0072	0	0	0	164.236	150.961	174.734	176.34	0.490329	-0.26158	-0.120464	0.207202	-0.0703223	0	0
77758	C(#C)[C@@](CC)(O)C	Methylpentynol	1.91	0	0.2225	0.0495063	27.1746	0	0	0	0	1	0	0	0	0	0	0	0	1131.71	0	64.911	36.8805	12.8787	3.03261	1.01606	0	0	92.9045	46.2934	31.0837	0	7.39879	7.61459	7.27781	6.79104	6.71846	0	164.435	146.913	160.364	166.407	0.246504	-0.152119	0.0579162	0.0160317	-0.101745	0.0480973	0.00856673
95807	c1(c(ccc(c1)N)C)N	Toluene-2,4-diamine	1.93	0	-0.5436	0.295501	42.3374	0	0	6	2	0	0	0	0	0	0	0	0	1412.4	0	77.6549	53.1467	25.2985	11.3619	6.60616	1.01606	0	111.6	69.5807	61.534	31.0837	7.38797	7.50233	7.33332	7.14008	7.2166	6.71846	166.275	153.904	155.591	167.958	0.267693	-0.16693	0.0751522	-0.0603061	0.0639047	-0.109045	0.0425934
109897	N(CC)CC	Diethylamine	1.93	0	0.285	0.081225	23.281	0	0	0	1	0	0	0	0	0	0	0	0	784.429	0	50.6796	15.4047	13.1188	4.71307	1.01606	0	0	89.6057	58.968	31.0837	0	7.14168	7.16518	6.94769	6.85152	6.71846	0	172.032	153.985	177.228	167.009	0.131269	-0.0422607	-0.0244966	-0.0264306	0.0176902	0.00459546	0.00526756
872504	C1(=O)N(CCC1)C	Methylpyrrolidone	1.97	0	-0.7741	0.599231	25.3112	0	0	0	1	1	0	0	0	0	0	0	0	1182.63	0	77.4146	33.0169	9.0415	1.01606	0	0	0	75.2703	31.0837	0	0	7.60763	7.56772	7.57997	6.71846	0	0	168.433	150.175	165.824	173.211	0.195184	-0.103711	0.0280456	0.0216397	-0.0588777	0.0153111	0
2809214	CC(O)(P(=O)(O)O)P(=O)(O)O	Etidronic acid	1.98	4	-0.8018	0.642883	33.3638	0	0	0	0	7	0	2	0	0	0	0	0	4007.18	0	231.707	146.424	58.6733	7.49218	1.01606	0	0	108.061	52.9108	31.0837	0	9.20743	9.2232	9.46993	7.89819	6.71846	0	171.107	153.247	162.692	179.234	1.23171	-0.904609	0.308951	-0.0499241	0.359503	-0.526506	0.196732
563804	C(C(C)=O)(C)C	Methyl isopropyl ketone	2	0	0.4804	0.230784	25.857	0	0	0	0	1	0	0	0	0	0	0	0	987.449	0	59.3528	31.2391	8.47466	1.01606	0	0	0	74.7309	31.0837	0	0	7.38993	7.57421	7.42867	6.71846	0	0	166.787	146.116	162.016	172.253	0.121026	-0.0480308	0.00737893	0.0121161	-0.0451797	0.0132027	0
96297	C(\CC)(=N/O)C	2-Butanone oxime	2.01	0	-0.1259	0.0158508	24.7532	0	0	0	1	1	0	0	0	0	0	0	0	1038.37	0	67.008	36.7702	18.1787	4.15072	1.01606	0	0	90.3518	44.2194	31.0837	0	7.61211	7.58928	7.8034	7.19942	6.71846	0	171.209	153.724	169.706	174.203	0.166198	-0.0412345	-0.0371137	0.0134582	-0.0458457	0.0102862	0.0173504
109068	c1(ccccn1)C	2-Methylpyridine	2.02	0	-0.3429	0.11758	31.8628	0	0	6	1	0	0	0	0	0	0	0	0	1068.89	0	81.6105	40.87	16.4801	5.04916	1.01606	0	0	107.111	61.503	31.0837	0	7.31957	7.46342	7.09476	6.86362	6.71846	0	161.888	145.225	162.827	162.965	0.0993145	-0.0243184	-0.000346	-0.0378926	-0.00561833	0.0129071	0.00561102
143226	C(OCCOCCO)COCCCC	Triethylene glycol monobutyl ether	2.04	0	-1.3661	1.86623	52.1292	0	0	0	0	4	0	0	0	0	0	0	0	2488.87	1334.17	70.8888	33.2067	32.635	28.7512	33.7575	29.8902	26.6835	118.634	103.724	116.63	112.915	7.68384	7.73565	7.3702	7.62334	7.74447	7.35314	168.832	149.569	169.816	164.566	0.716489	-0.195637	-0.366988	0.311872	-0.0444782	-0.214106	0.220912
94757	c1cc(c(cc1Cl)Cl)OCC(=O)O	2,4-D	2.05	1	1.0983	1.20626	53.1163	0	0	6	0	3	0	0	0	2	0	0	2	4441.52	1148.47	142.46	127.827	144.718	104.413	129.1	77.4659	229.694	222.212	202.623	186.684	156.273	8.67586	8.75021	8.31447	8.2224	8.55678	8.88232	158.765	144.409	158.887	157.829	0.522595	-0.286963	-0.0291093	0.167562	-0.154865	-0.000239	0.148619
4214793	n1c(ccc(c1)Cl)O	5-Chloro-2-pyridinol	2.06	0	1.1631	1.3528	33.223	0	0	6	1	1	0	0	0	1	0	0	1	2434.25	0	131.995	102.785	62.5434	116.464	35.7336	0	0	138.499	107.644	125.161	0	8.35045	8.31729	8.14267	7.99413	9.0072	0	161.541	148.201	162.907	168.836	0.291993	-0.191935	0.10084	-0.0299142	-0.099666	0.102937	-0.0282584
627305	C(CO)CCl	3-Chloro-1-propanol	2.07	0	0.0192	0.000369	20.5162	0	0	0	0	1	0	0	0	1	0	0	1	1952.58	0	90.4774	37.732	57.4241	12.5886	0	0	0	87.1519	62.4429	0	0	7.92318	7.58599	8.09023	7.48138	0	0	169.035	150.625	173.2	180.189	0.248541	-0.101212	-0.033683	-0.0183064	0.0442438	-0.0153129	0
105599	N(CCO)(CCO)C	N-Methyldiethanolamine	2.08	0	-0.7587	0.575626	32.5727	0	0	0	1	2	0	0	0	0	0	0	0	1442.66	1.01606	67.1501	32.1939	26.209	16.5694	17.0912	6.05304	1.01606	99.8956	74.1291	57.5758	48.0604	7.71179	7.59542	7.26045	7.65224	7.59667	7.63603	172.383	155.298	169.126	168.667	0.523374	-0.201291	-0.177439	0.182848	-0.0373465	-0.144277	0.18916
104676	O1[C@@H](CCC1=O)CCCCCCC	2(3H)-Furanone, 5-heptyldihydro-	2.09	0	-2.0714	4.2907	40.5187	0	0	0	0	2	0	0	0	0	0	0	0	2119.16	1067.38	68.5235	26.5035	25.2501	25.116	25.6298	26.3363	27.3688	112.902	111.032	110.9	110.719	7.3945	7.3175	7.23365	7.21774	7.25414	7.30419	165.576	145.164	166.083	165.694	0.280605	-0.164795	0.0825636	-0.0397143	-0.0197889	-0.00149771	-0.000527
584021	C(CC)(CC)O	3-Pentanol	2.11	0	-0.9841	0.968453	23.5831	0	0	0	0	1	0	0	0	0	0	0	0	989.481	0	54.0309	23.6958	12.1375	3.78882	1.01606	0	0	82.6549	51.997	31.0837	0	7.31533	7.35626	7.38902	6.81826	6.71846	0	168.802	148.827	168.931	171.643	0.220916	-0.112109	0.00158144	0.0192677	-0.0523958	0.0283973	0.00479996
127060	N(\O)=C(\C)C	Acetoxime	2.12	0	-0.2021	0.0408444	19.7297	0	0	0	1	1	0	0	0	0	0	0	0	892.069	0	69.9667	36.9195	7.65416	1.01606	0	0	0	58.9005	31.0837	0	0	7.76701	7.97095	7.73697	6.71846	0	0	172.625	156.281	170.959	181.271	0.161618	-0.0388777	-0.0270285	-0.00715913	-0.05102	0.0432763	0
1634044	CC(C)(C)OC	t-Butyl methyl ether	2.12	0	0.9818	0.963931	26.8163	0	0	0	0	1	0	0	0	0	0	0	0	989.481	0	56.6121	25.2177	5.45247	1.01606	0	0	0	64.5449	31.0837	0	0	7.31533	7.79795	6.87813	6.71846	0	0	168.802	148.502	159.473	172.2	0.16634	-0.0458133	0.0159461	-0.0993549	0.00929408	0.0367582	0
55185	N(CC)(CC)N=O	N-Nitrosodiethylamine	2.12	0	0.5916	0.349991	28.6381	0	0	0	2	1	0	0	0	0	0	0	0	1235.58	0	72.8981	37.8483	29.7389	7.56655	1.01606	0	0	116.686	64.7294	31.0837	0	7.71186	7.64284	7.8969	7.50643	6.71846	0	174.37	157.581	177.985	171.517	0.0618823	-0.020812	0.01164	-0.0123506	-0.00145801	-0.0132923	0.00533176
17584122	Cc1nnc(N)nc1C	3-Amino-5,6-dimethyl-1,2,4-triazine	2.12	0	-0.0163	0.000266	31.6387	0	0	6	4	0	0	0	0	0	0	0	0	1514.23	0	92.4153	72.3157	36.0564	15.0803	6.60616	1.01606	0	138.665	83.7268	61.534	31.0837	7.77981	8.16818	7.81592	7.33624	7.2166	6.71846	174.016	160.231	173.704	172.16	0.254126	-0.210913	0.154963	-0.0338129	-0.0673575	0.0136287	-0.00610652
621421	c1(cc(ccc1)O)NC(C)=O	Metacetamol	2.13	0	-0.2314	0.053546	44.7549	0	0	6	1	2	0	0	0	0	0	0	0	1871.39	6.09638	92.2824	56.9009	51.2848	47.6253	39.9476	11.0937	1.01606	150.709	155.234	114.772	82.8463	7.88477	8.02902	7.59321	7.90827	7.60678	7.93072	163.038	148.812	162.374	163.276	0.400092	-0.250912	0.16206	-0.191464	0.184416	-0.235997	0.213179
138863	C([C@@H]1CCC(C)=CC1)(C)=C	Limonene	2.15	0	2.1424	4.58988	46.0152	0	0	0	0	0	0	0	0	0	0	0	0	1458.9	15.241	62.9367	33.7654	18.476	11.6975	14.4169	12.1071	1.01606	106.99	77.8109	83.0155	114.737	7.03464	7.12828	6.99549	6.88977	6.89123	7.11763	162.563	142.996	153.58	163.448	0.0564909	1.79e-05	-0.00973295	-0.0321183	-0.004147	0.0112989	0.0109351
108930	C1(CCCCC1)O	Cyclohexanol	2.15	0	-1.9507	3.80523	20.5205	0	0	0	0	1	0	0	0	0	0	0	0	1133.75	0	63.5291	22.1025	10.4393	3.44623	1.01606	0	0	68.2945	41.9963	31.0837	0	7.32718	7.26824	7.18312	7.06579	6.71846	0	166.591	146.507	166.408	174.35	0.221808	-0.10684	-0.0030662	-0.00382297	-0.00815711	-0.000194	0.0111761
109853	C(CN)OC	2-Methoxyethanamine	2.16	0	-0.7785	0.606062	20.9623	0	0	0	1	1	0	0	0	0	0	0	0	894.101	0	62.2937	24.8444	15.066	6.60616	1.01606	0	0	76.0866	61.534	31.0837	0	7.61722	7.53726	7.24921	7.2166	6.71846	0	174.381	158.791	173.408	174.934	0.306013	-0.104452	-0.118658	0.112998	-0.051117	-0.0291898	0.0374115
111411	N(CCN)CCO	Aminoethyl ethanolamine	2.16	0	-1.5842	2.50969	28.9355	0	0	0	2	1	0	0	0	0	0	0	0	1237.61	2.03213	63.3749	24.437	22.945	21.5342	18.3929	5.82994	1.01606	94.34	87.7824	67.9147	48.6107	7.6073	7.45026	7.33104	7.41797	7.53936	7.50355	175.48	161.166	177.579	174.446	0.470541	-0.220691	-0.110834	0.199463	-0.156998	-0.000609	0.121654
100709	c1(ccccn1)C#N	2-Pyridinecarbonitrile	2.16	0	-0.3181	0.101188	32.637	0	0	6	2	0	0	0	0	0	0	0	0	1262.04	0	106.205	64.5139	47.6288	41.9199	14.1191	0	0	156.277	128.153	86.9662	0	7.71002	7.60219	7.5554	7.8329	8.27885	0	160.243	144.786	161.454	165.403	0.202423	-0.068274	-0.0968799	0.0778337	0.0118852	-0.00958847	-0.0161881
77747	C(CC)(CC)(C)O	3-Methyl-3-pentanol	2.18	0	-0.7791	0.606997	28.2207	0	0	0	0	1	0	0	0	0	0	0	0	1135.78	0	54.3502	28.436	10.2771	2.6005	1.01606	0	0	81.189	43.0342	31.0837	0	7.26921	7.51781	7.21695	6.77549	6.71846	0	168.336	148.155	163.562	169.74	0.219161	-0.123066	0.0511364	-0.0328351	-0.0489449	0.0393245	0.00480403
108941	C1(CCCCC1)=O	Cyclohexanone	2.2	0	-1.0582	1.11979	23.1792	0	0	0	0	1	0	0	0	0	0	0	0	1131.71	0	69.3423	25.3339	12.7097	4.03825	0	0	0	73.4029	41.2697	0	0	7.39879	7.34271	7.30936	7.269	0	0	164.435	143.843	165.532	173.677	0.123334	-0.0407646	-0.00782925	-0.00428479	-0.000318	-0.00847017	0
30899195	CCCCC.*O	Pentanol	2.21	0	-0.7614	0.57973	20.5322	0	0	0	0	0	0	0	0	0	0	0	0	733.513	0	45.1463	13.2875	10.4293	4.71307	1.01606	0	0	76.6009	58.968	31.0837	0	6.96024	6.91937	6.89675	6.85152	6.71846	0	167.823	146.54	169.324	170.989	0.0248029	-0.00441237	-0.0106598	-5.8e-05	-0.00023	-0.00176814	0.00472686
15673004	C(CCN)(C)(C)C	3,3-Dimethylbutylamine	2.23	0	1.0735	1.1524	32.5129	0	0	0	1	0	0	0	0	0	0	0	0	1077.02	0	51.1995	21.2816	11.0192	6.60616	1.01606	0	0	64.2994	61.534	31.0837	0	7.10099	7.15784	6.90604	7.2166	6.71846	0	170.262	151.595	158.514	176.16	0.160409	-0.0830219	0.00824099	-0.035336	0.0744175	-0.0944895	0.0499845
5813649	C(CN)(C)(C)C	Neopentylamine	2.26	0	0.8179	0.66896	28.0611	0	0	0	1	0	0	0	0	0	0	0	0	930.725	0	50.3728	22.203	4.09062	1.01606	0	0	0	47.8314	31.0837	0	0	7.11812	7.19769	6.99244	6.71846	0	0	171.007	152.804	156.903	183.647	0.156206	-0.0853571	0.00376315	0.0319493	-0.0785338	0.0500756	0
55210	c1ccc(cc1)C(=O)N	Benzamide	2.26	0	0.573	0.328329	37.1772	0	0	6	1	1	0	0	0	0	0	0	0	1469.13	0	91.189	56.8256	44.2834	28.678	7.31556	1.01606	0	141.475	101.287	65.3485	31.0837	7.71039	7.61293	7.7424	7.65903	7.35739	6.71846	161.167	147.841	155.922	164.603	0.268931	-0.191945	0.0904822	-0.0107314	-0.0091442	-0.011017	-0.017889
103902	c1(ccc(cc1)O)NC(=O)C	Acetaminophen	2.27	0	-0.2314	0.053546	44.7549	0	0	6	1	2	0	0	0	0	0	0	0	1871.39	76.6151	92.2824	56.9009	45.5534	47.1098	33.0498	38.7441	15.323	148.016	147.417	117.447	91.9733	7.88477	8.02902	7.57441	7.6548	7.69298	7.60657	163.038	148.812	162.374	163.276	0.398641	-0.253049	0.171386	-0.150902	-0.0302322	0.165267	-0.219851
71410	CCCCCO	n-Pentanol	2.27	0	-1.2614	1.59113	21.9103	0	0	0	0	1	0	0	0	0	0	0	0	989.481	0	54.0309	18.0197	16.867	14.7263	5.71805	1.01606	0	84.4993	72.7705	50.7873	31.0837	7.31533	7.13009	7.17295	7.25255	7.4399	6.71846	168.802	148.827	169.727	171.347	0.225732	-0.100514	-0.0320202	0.0149586	0.00243292	0.0100389	-0.0222378
108214	C(OC(=O)C)(C)C	Isopropyl acetate	2.28	0	-0.029	0.000841	26.9114	0	0	0	0	2	0	0	0	0	0	0	0	1243.42	0	70.6472	31.3561	34.1333	11.6712	1.01606	0	0	123.401	93.4368	31.0837	0	7.74063	8.15323	7.34427	7.73305	6.71846	0	167.885	148.227	170.252	164.206	0.253802	-0.168264	0.131426	-0.12208	0.0558274	-0.0391572	0.0153466
75310	C(C)(C)N	Isopropylamine	2.28	0	-0.6977	0.486785	19.4174	0	0	0	1	0	0	0	0	0	0	0	0	638.133	0	47.4795	8.91307	1.01606	0	0	0	0	31.0837	0	0	0	7.1761	7.27488	6.71846	0	0	0	173.529	157.032	174.851	184.918	0.146158	-0.0846958	0.033321	-0.0618403	0.0401362	0	0
108101	C(CC(C)=O)(C)C	Methyl isobutyl ketone	2.28	0	0.3538	0.125174	29.5874	0	0	0	0	1	0	0	0	0	0	0	0	1133.75	0	58.8205	25.1301	19.9402	11.6712	1.01606	0	0	83.8365	93.4368	31.0837	0	7.32718	7.44479	7.07607	7.73305	6.71846	0	166.591	145.821	161.736	173.082	0.12547	-0.0437928	0.0134121	-0.0582305	0.0643548	-0.0514431	0.0129643
107108	C(CN)C	1-Aminopropane	2.28	0	-0.975	0.950625	17.7446	0	0	0	1	0	0	0	0	0	0	0	0	638.133	0	47.4795	12.3104	5.11547	1.01606	0	0	0	53.4139	31.0837	0	0	7.1761	7.05043	7.08376	6.71846	0	0	173.529	157.032	175.819	183.223	0.149553	-0.0799782	-0.00720318	0.0152117	-0.0191318	0.0163252	0
4412913	c1(ccoc1)CO	3-Furanmethanol	2.29	0	-0.9048	0.818663	26.7964	0	0	5	0	2	0	0	0	0	0	0	0	1239.35	0	94.6316	44.2608	34.0748	6.9179	1.01606	0	0	94.5506	57.5856	31.0837	0	8.05514	7.63402	8.06878	7.56197	6.71846	0	162.645	147.539	158.212	173.803	0.341002	-0.127159	-0.0761937	0.00647575	0.057752	-0.0502042	0.0188283
75047	C(C)N	Ethylamine	2.3	0	-0.3972	0.157768	14.2126	0	0	0	1	0	0	0	0	0	0	0	0	491.837	0	44.5862	5.11547	1.01606	0	0	0	0	31.0837	0	0	0	7.23119	7.08376	6.71846	0	0	0	175.925	161.261	183.223	184.918	0.145153	-0.0789871	-0.000195	-0.0105476	0.0171534	0	0
79209	C(OC)(C)=O	Methyl acetate	2.32	0	0.0211	0.000445	17.4128	0	0	0	0	2	0	0	0	0	0	0	0	950.825	0	79.3399	42.6828	13.4471	1.01606	0	0	0	103.829	31.0837	0	0	8.14871	8.70494	7.90214	6.71846	0	0	169.163	150.556	168.237	163.81	0.253701	-0.150498	0.0705735	-0.0283879	-0.0345337	0.0159959	0
6636788	c1(ncccc1O)Cl	2-Chloro-3-pyridinol	2.32	0	0.7265	0.527802	33.8957	0	0	6	1	1	0	0	0	1	0	0	1	2434.25	0	131.995	126.779	62.1441	16.2459	1.01606	0	0	138.656	88.2488	31.0837	0	8.35045	8.33417	8.26281	8.07862	6.71846	0	161.541	148.201	161.14	172.158	0.309782	-0.174161	-0.0612866	0.180424	-0.101855	-0.0162206	0.0182086
107222	C(=O)C=O	Glyoxal	2.33	0	0.7362	0.54199	12.5614	0	0	0	0	2	0	0	0	0	0	0	0	802.496	0	110.561	72.3095	0	0	0	0	0	0	0	0	0	9.20357	9.75313	0	0	0	0	165.721	147.945	185.184	0	0.264965	-0.0331238	-0.132482	0.0331238	0	0	0
105373	C(OCC)(CC)=O	Ethyl propionate	2.36	0	0.3477	0.120895	26.7301	0	0	0	0	2	0	0	0	0	0	0	0	1243.42	0	70.6472	36.2289	38.581	17.6545	4.71307	1.01606	0	144.946	107.848	58.968	31.0837	7.74063	7.8514	8.37265	7.44468	6.85152	6.71846	167.885	148.227	172.225	164.459	0.260022	-0.163578	0.0674726	0.00444052	-0.0373114	-0.0128034	0.00641544
108894	Cc1ccncc1	4-Methylpyridine	2.36	0	0.165	0.027225	31.6683	0	0	6	1	0	0	0	0	0	0	0	0	1068.89	0	81.6105	41.0897	15.3167	4.58961	0	0	0	92.6914	46.3244	0	0	7.31957	7.32932	7.04429	7.14402	0	0	161.888	145.225	155.638	165.737	0.1028	-0.0148457	-0.0306063	-0.0353344	0.0268368	0.00254978	0
591786	C(C(=O)C)CCC	2-Hexanone	2.37	0	-0.7438	0.553238	27.0415	0	0	0	0	1	0	0	0	0	0	0	0	1133.75	0	58.8205	23.4238	20.439	19.9055	8.47466	1.01606	0	96.6051	90.8821	74.7309	31.0837	7.32718	7.38338	7.18074	7.25331	7.42867	6.71846	166.591	145.821	166.627	168.893	0.125783	-0.0429517	0.00902716	-0.034731	0.00418915	0.0174235	-0.0222525
100516	OCc1ccccc1	Benzyl alcohol	2.37	0	0.7591	0.576233	37.0125	0	0	6	0	1	0	0	0	0	0	0	0	1273.95	0	81.4306	43.9188	27.9372	18.3176	5.38306	1.01606	0	112.817	80.5694	53.5142	31.0837	7.49269	7.3027	7.41644	7.39451	7.24378	6.71846	159.522	143.622	155.108	164.376	0.246979	-0.10359	-0.0474501	0.0430532	-0.020525	-0.00438728	-0.00362599
120070	c1(N(CCO)CCO)ccccc1	N-Phenyl diethanolamine	2.39	0	0.0956	0.00913936	57.1595	0	0	6	1	2	0	0	0	0	0	0	0	2166.01	65.6127	79.7429	45.5606	45.0008	37.3569	27.8909	16.3811	5.04713	159.183	134.382	102.066	75.4364	7.61026	7.56122	7.40541	7.46726	7.56197	7.43264	165.138	149.035	165.01	158.785	0.536359	-0.214241	-0.132276	0.16178	-0.116736	-0.0186544	0.121641
20662844	c1(c(oc(n1)C)C)C	2,4,5-Trimethyloxazole	2.4	0	0.5302	0.281112	33.4122	0	0	5	1	1	0	0	0	0	0	0	0	1326.89	0	82.7544	53.4337	22.969	7.35379	1.01606	0	0	131.509	78.8854	31.0837	0	7.60368	8.22852	7.55571	6.94656	6.71846	0	165.983	148.193	166.666	159.933	0.182911	-0.116077	0.0931604	-0.0794673	-0.0106494	0.00470914	0.0168683
629403	C(CCCC#N)CCC#N	Suberonitrile	2.41	0	-1.013	1.02617	33.142	0	0	0	2	0	0	0	0	0	0	0	0	1558.7	392.952	71.0291	26.9948	28.0947	29.7946	32.7694	39.3139	65.4921	119.454	121.524	125.145	133.112	7.33404	7.15846	7.19515	7.25186	7.35111	7.56945	166.175	145.35	166.915	167.469	0.190272	-0.04924	-0.0237791	-0.022875	0.00156194	0.0149363	0.0328286
100710	c1(ccccn1)CC	2-Ethylpyridine	2.41	0	-0.2667	0.0711289	36.8863	0	0	6	1	0	0	0	0	0	0	0	0	1215.19	0	77.1191	39.647	27.1135	14.2785	4.71307	1.01606	0	134.764	96.7145	58.968	31.0837	7.26185	7.31991	7.2975	6.97911	6.85152	6.71846	162.533	145.07	164.174	162.55	0.103814	-0.0271407	-0.0108779	-0.00492363	-0.0282838	0.00734938	0.00750934
75092	C(Cl)Cl	Methylene chloride	2.41	0	1.0729	1.15111	16.4383	0	0	0	0	0	0	0	0	2	0	0	2	2659.7	0	218.949	0	0	0	0	0	0	0	0	0	0	9.02574	0	0	0	0	0	166.59	149.571	0	0	0.0776593	-0.0222464	-0.0165833	0	0	0	0
928961	C(=C/CC)\CCO	3-Hexenol	2.42	0	-0.5056	0.255631	29.3173	0	0	0	0	1	0	0	0	0	0	0	0	1133.75	3.04819	59.0439	22.8103	24.1956	21.0342	15.4119	5.71805	1.01606	109.279	98.5419	74.8549	50.7873	7.32718	7.17455	7.18151	7.19159	7.27926	7.4399	166.591	147.603	167.335	165.322	0.241719	-0.0998587	-0.0460831	0.0222423	0.00482553	-0.00890674	0.0121706
13952846	C([C@@H](C)N)C	sec-Butylamine	2.43	0	-0.9857	0.971604	22.329	0	0	0	1	0	0	0	0	0	0	0	0	784.429	0	49.2155	16.7787	5.28397	1.01606	0	0	0	58.9794	31.0837	0	0	7.14168	7.19923	6.98095	6.71846	0	0	172.032	154.495	171.915	177.711	0.150842	-0.0859474	0.0249234	-0.0278327	-0.00806017	0.0214959	0
109739	C(CC)CN	n-Butylamine	2.44	0	-1.263	1.59517	20.6562	0	0	0	1	0	0	0	0	0	0	0	0	784.429	0	49.2155	14.9154	12.3104	5.11547	1.01606	0	0	72.2196	53.4139	31.0837	0	7.14168	7.03319	7.05043	7.08376	6.71846	0	172.032	154.495	172.685	175.819	0.153875	-0.0798689	-0.0103609	0.0102979	0.00661403	-0.0199173	0.0162978
29553262	C(C(C)(C)O)(C(F)F)(F)F	2-Methyl-3,3,4,4-tetrafluoro-2-butanol	2.44	0	1.2292	1.51093	26.5455	0	0	0	0	1	0	0	4	0	0	0	4	2429.17	0	104.874	108.469	42.8691	13.1056	0	0	0	91.2497	59.8169	0	0	9.37789	9.63323	8.72504	9.15149	0	0	195.166	158.959	187.377	198.072	0.590389	-0.219883	-0.268009	0.163903	0.137804	-0.10901	0
62555	C(=S)(C)N	Thioacetamide	2.44	0	0.2742	0.0751856	20.8568	0	0	0	1	0	1	0	0	0	0	0	0	1517.65	0	95.2668	22.8154	1.01606	0	0	0	0	31.0837	0	0	0	7.5132	7.73945	6.71846	0	0	0	166.305	157.72	160.357	184.918	0.127029	-0.0880083	0.0498088	-0.0472386	0.0219235	0	0
1445756	P(OC(C)C)(OC(C)C)(C)=O	Diisopropyl methylphosphonate	2.45	0	-0.2208	0.0487526	45.1398	0	0	0	0	3	0	1	0	0	0	0	0	2754.4	36.5783	112.07	54.454	51.1445	21.4164	14.1818	8.41008	1.01606	145.077	113.867	82.1044	86.8523	7.62064	8.08433	7.49015	8.04732	6.8882	6.98458	167.767	146.795	167.892	161.203	0.380697	-0.305745	0.320302	-0.253786	0.142797	-0.165016	0.052488
693981	c1([nH]ccn1)C	2-Methylimidazole	2.46	0	-1.596	2.54722	22.9565	0	0	5	2	0	0	0	0	0	0	0	0	975.545	0	86.3446	27.4153	8.41008	1.01606	0	0	0	86.8523	31.0837	0	0	7.57301	7.73518	6.98458	6.71846	0	0	169.93	155.956	177.334	163.721	0.167411	-0.084173	0.0459729	-0.0857755	0.0255518	0.0147185	0
141913	CC1CNCC(O1)C	2,6-Dimethyl morpholine	2.47	0	-0.5495	0.30195	32.9367	0	0	0	1	1	0	0	0	0	0	0	0	1330.96	0	69.3936	30.5743	16.5923	6.56158	1.01606	0	0	95.572	72.9102	31.0837	0	7.43507	7.70235	7.18442	6.91805	6.71846	0	169.59	151.252	169.11	171.44	0.282978	-0.0979364	-0.0947339	0.042533	-0.0411586	0.0300078	0.0197994
6485558	C[C@@H]1CNC[C@H](C)O1	2,6-Dimethylmorpholine, cis-	2.47	0	-0.5495	0.30195	32.9367	0	0	0	1	1	0	0	0	0	0	0	0	1330.96	0	69.3936	30.5743	16.5923	6.56158	1.01606	0	0	95.572	72.9102	31.0837	0	7.43507	7.70235	7.18442	6.91805	6.71846	0	169.59	151.252	169.11	171.44	0.282978	-0.0979364	-0.0947339	0.042533	-0.0411586	0.0300078	0.0197994
598743	C([C@@H](C)N)(C)C	1,2-Dimethylpropylamine	2.49	0	-0.1761	0.0310112	27.7865	0	0	0	1	0	0	0	0	0	0	0	0	930.725	0	50.3728	22.8578	6.35095	1.01606	0	0	0	65.9533	31.0837	0	0	7.11812	7.21303	7.04657	6.71846	0	0	171.007	152.804	165.695	175.91	0.154549	-0.0883669	0.0249376	-0.00493943	-0.0523977	0.0434919	0
87912	CCOC(=O)[C@H](O)[C@@H](O)C(=O)OCC	Diethyl tartrate	2.5	0	-0.7116	0.506375	44.3392	0	0	0	0	6	0	0	0	0	0	0	0	2704.15	536.577	90.2286	70.3329	76.8598	59.4501	37.7233	29.1119	22.3574	169.525	147.02	119.886	97.6246	8.37475	8.55163	8.90261	8.59096	7.87368	8.01649	168.425	150.687	169.367	164.823	0.981973	-0.504281	-0.207066	0.381966	-0.216877	0.122909	-0.0303675
109977	c1cc[nH]c1	Pyrrole	2.5	0	-0.5268	0.277518	22.4206	0	0	5	1	0	0	0	0	0	0	0	0	778.333	0	83.1816	8.67834	1.01606	0	0	0	0	31.0837	0	0	0	7.3956	7.1394	6.71846	0	0	0	164.301	151.783	169.657	184.918	0.11562	-0.0308053	-0.0319116	-0.0266287	0.0315358	0	0
88686	c1(c(cccc1)N)C(=O)N	2-Aminobenzamide	2.54	0	-0.6237	0.389002	40.727	0	0	6	2	1	0	0	0	0	0	0	0	1666.34	0	91.2996	65.996	53.4332	22.8002	4.61578	1.01606	0	148.994	95.6037	50.6636	31.0837	7.79368	7.75046	7.83927	7.83311	7.08357	6.71846	165.269	153.96	156.926	165.668	0.385132	-0.269976	0.115878	-0.102228	0.228846	-0.242324	0.0614459
99036	c1(cc(ccc1)N)C(C)=O	3-Aminoacetophenone	2.55	0	-0.2428	0.0589518	44.0559	0	0	6	1	1	0	0	0	0	0	0	0	1615.42	0	85.658	57.575	41.556	33.8311	9.90947	1.01606	0	145.21	114.9	79.4575	31.0837	7.59703	7.70859	7.51415	7.46829	7.62048	6.71846	161.858	147.289	155.581	161.174	0.263079	-0.131974	0.0356324	-0.0398222	-0.0505008	0.129014	-0.103188
540885	C(OC(C)=O)(C)(C)C	tert-Butyl acetate	2.55	0	0.9524	0.907066	31.2166	0	0	0	0	2	0	0	0	0	0	0	0	1389.71	0	68.3597	32.3435	26.2667	13.4471	1.01606	0	0	97.6631	103.829	31.0837	0	7.6284	8.16792	7.10074	7.90214	6.71846	0	167.534	147.615	163.013	170.459	0.252469	-0.17881	0.17664	-0.191226	0.111459	-0.0675686	0.0232708
142621	C(CCCC)C(O)=O	Caproic acid	2.56	1	-1.0177	1.03571	26.402	0	0	0	0	2	0	0	0	0	0	0	0	1389.71	3.04819	66.0502	25.2218	24.9696	26.0055	28.0774	12.3224	1.01606	101.52	98.0714	91.1739	74.3318	7.6284	7.38317	7.38724	7.52058	7.78726	8.59795	167.534	147.905	167.988	169.366	0.318278	-0.221976	0.122728	-0.0692315	0.0044375	0.00378463	0.0299236
109751	C(C=C)C#N	Allyl cyanide	2.57	0	0.777	0.603729	20.895	0	0	0	1	0	0	0	0	0	0	0	0	778.333	0	73.5073	31.18	26.3294	14.1191	0	0	0	95.2231	86.9662	0	0	7.3956	7.33315	7.26984	8.27885	0	0	164.301	145.517	168.54	175.902	0.116754	-0.0302671	-0.0331906	-0.00132211	0.034419	-0.0280163	0
928972	C(=C\CC)\CCO	3-Hexen-1-ol, (3E)-	2.57	0	-0.5056	0.255631	29.3173	0	0	0	0	1	0	0	0	0	0	0	0	1133.75	3.04819	59.0439	22.8103	24.1956	21.0342	15.4119	5.71805	1.01606	109.279	98.5419	74.8549	50.7873	7.32718	7.17455	7.18151	7.19159	7.27926	7.4399	166.591	147.603	167.335	165.322	0.241719	-0.0998587	-0.0460831	0.0222423	0.00482553	-0.00890674	0.0121706
6602320	c1(c(nccc1)Br)O	2-Bromo-3-pyridinol	2.57	0	-0.0743	0.00552049	36.4497	0	0	6	1	1	0	0	0	0	1	0	1	7562.2	0	176.489	220.415	113.557	27.4483	1.01606	0	0	150.343	93.9252	31.0837	0	8.20765	8.21094	8.05561	7.91273	6.71846	0	159.158	147.118	158.946	167.538	0.297934	-0.164322	-0.0576276	0.163981	-0.0947916	-0.0144112	0.0182048
626937	C([C@@H](C)O)CCC	2-Hexanol	2.57	0	-1.2721	1.61824	26.4947	0	0	0	0	1	0	0	0	0	0	0	0	1135.78	0	54.3502	19.9156	16.8051	16.867	6.87178	1.01606	0	86.5483	84.4993	66.2437	31.0837	7.26921	7.28366	7.10069	7.17295	7.24476	6.71846	168.336	148.155	168.069	170.812	0.224926	-0.11006	0.00827384	-0.03227	0.0195646	0.0115713	-0.0293361
623370	C([C@@H](CC)O)CC	3-Hexanol	2.57	0	-1.2721	1.61824	26.4947	0	0	0	0	1	0	0	0	0	0	0	0	1135.78	0	54.3502	23.3519	18.1485	10.4276	4.18493	1.01606	0	92.1779	75.4899	54.9846	31.0837	7.26921	7.28706	7.30681	7.12668	6.83251	6.71846	168.336	148.155	168.068	170.074	0.225376	-0.111818	-0.00232204	0.00888031	-0.0127981	-0.0126972	0.0132849
141786	O(C(=O)C)CC	Ethyl acetate	2.58	0	0.2715	0.0737123	21.7066	0	0	0	0	2	0	0	0	0	0	0	0	1097.12	0	73.9905	32.8073	38.7949	8.47466	1.01606	0	0	150.681	74.7309	31.0837	0	7.90094	8.24507	7.78815	7.42867	6.71846	0	168.387	149.123	174.467	156.291	0.254204	-0.158824	0.0962097	-0.0680688	0.00729471	-0.0113036	0.00759001
127004	C([C@@H](C)O)Cl	2-Propanol, 1-chloro-	2.59	0	0.2965	0.0879122	22.189	0	0	0	0	1	0	0	0	1	0	0	1	1952.58	0	90.4774	57.1509	10.2741	0	0	0	0	56.171	0	0	0	7.92318	8.03511	7.32879	0	0	0	169.035	150.625	171.726	182.63	0.249464	-0.110602	-0.0366171	0.0250574	-0.00257025	0	0
80626	C(C(C)=C)(OC)=O	Methyl methacrylate	2.59	0	1.1651	1.35746	26.4176	0	0	0	0	2	0	0	0	0	0	0	0	1241.39	0	79.0101	66.4461	22.5249	12.1071	1.01606	0	0	101.83	114.737	31.0837	0	7.87691	7.90732	8.32791	7.11763	6.71846	0	165.614	147.528	151.795	176.244	0.278577	-0.183306	0.0205281	0.150567	-0.146748	-0.0110985	0.0307684
79061	C(C=C)(N)=O	Acrylamide	2.6	0	-0.034	0.001156	17.5136	0	0	0	1	1	0	0	0	0	0	0	0	890.037	0	79.2766	39.4469	10.8423	1.01606	0	0	0	78.7	31.0837	0	0	7.97672	8.11703	7.89653	6.71846	0	0	170.166	158.36	171.043	180.216	0.248371	-0.200494	0.141423	-0.0268758	-0.0656062	0.0273678	0
693210	[N+](=O)(OCCOCCO[N+](=O)[O-])[O-]	Diethylene glycol dinitrate	2.6	0	1.2773	1.6315	30.9483	0	0	0	2	7	0	0	0	0	0	0	0	2769.35	1349.08	124.931	63.166	61.5714	62.3362	78.2183	77.908	103.776	143.788	118.901	151.031	148.545	9.41786	8.54601	8.59955	8.96526	8.88961	9.57567	176.531	163.975	174.384	172.103	0.385065	-0.178328	-0.0457346	0.098468	-0.130403	0.0947132	0.0533638
122996	c1(ccccc1)OCCO	Phenoxyethanol	2.6	0	0.3654	0.133517	43.8916	0	0	6	0	2	0	0	0	0	0	0	0	1676.21	32.2983	85.5716	46.5841	41.9019	39.8694	29.2564	18.3176	5.38306	150.844	145.444	112.657	80.5694	7.71061	7.76851	7.55298	7.40002	7.44135	7.39451	161.722	145.544	163.257	159.626	0.379357	-0.148229	-0.0917906	0.10918	-0.0913357	0.0268999	0.000175
2008584	c1(c(cccc1Cl)Cl)C(=O)N	2,6-Dichlorobenzamide	2.61	0	1.3104	1.71715	46.6096	0	0	6	1	1	0	0	0	2	0	0	2	3980.5	0	142.899	144.809	220.093	40.9312	7.31556	1.01606	0	240.576	134.491	65.3485	31.0837	8.38003	8.27244	8.8623	8.46682	7.35739	6.71846	159.072	146.953	153.861	161.118	0.307178	-0.193536	0.124201	-0.230377	0.27081	-0.124574	-0.0159252
6948863	N(CC(OCC)OCC)(CC(OCC)OCC)C	N,N-Bis(2,2-diethoxyethyl)methylamine	2.62	0	1.1975	1.43401	70.8125	0	0	0	1	4	0	0	0	0	0	0	0	3124.97	2653.5	70.8417	42.6066	46.5257	32.8408	32.4312	20.8519	20.4115	144.172	121.255	126.971	96.5788	7.58448	7.87981	7.65046	7.84253	7.45123	7.11398	169.446	150.414	168.588	161.836	0.72438	-0.273296	-0.146105	0.211211	0.048228	-0.568229	0.417843
141979	C(C(=O)OCC)C(=O)C	Ethyl acetoacetate	2.64	0	0.0425	0.00180625	31.6018	0	0	0	0	3	0	0	0	0	0	0	0	1643.65	9.14458	81.488	46.4318	61.4551	31.0717	26.202	8.47466	1.01606	147.436	122.408	110.815	74.7309	8.02541	8.32954	8.09262	8.13273	7.43159	7.42867	166.647	147.321	168.667	163.825	0.379576	-0.169308	0.0921292	-0.267087	0.230232	-0.0667523	0.000317
6921295	N(CC#C)(CC#C)CC#C	Tripropargylamine	2.65	0	2.3427	5.48824	40.3272	0	0	0	1	0	0	0	0	0	0	0	0	1503.72	3.04819	82.1813	54.1516	35.8169	45.1463	24.6489	12.1071	1.01606	143.069	191.932	111.046	114.737	7.29118	7.36752	7.12012	7.22335	6.94995	7.11763	158.771	146.102	148.91	164.287	0.215849	-0.0575568	-0.0836846	0.0869779	-0.100286	0.0295596	0.0589816
123386	C(C=O)C	Propionaldehyde	2.65	0	-0.1063	0.0112997	16.7418	0	0	0	0	1	0	0	0	0	0	0	0	694.857	0	61.4816	18.7317	8.57153	0	0	0	0	56.5487	0	0	0	7.6284	7.41296	8.09482	0	0	0	167.534	147.296	174.37	185.051	0.124167	-0.0278816	-0.0315562	0.0113499	-0.0139956	0	0
105146	N(CCCC(C)=O)(CC)CC	2-Pentanone, 5-(diethylamino)-	2.67	0	0.2231	0.0497736	45.8224	0	0	0	1	1	0	0	0	0	0	0	0	1769.85	254.24	61.8103	30.4074	25.1099	18.5515	20.8414	26.202	8.47466	118.876	92.2281	90.5977	110.815	7.30229	7.43621	7.19523	7.08345	7.06654	7.43159	168.376	148.773	167.554	163.346	0.226804	-0.0457088	-0.0202415	-0.0735365	-0.0537632	0.0864141	0.0102847
50066	C1(c2ccccc2)(C(=O)NC(=O)NC1=O)CC	Phenobarbital	2.68	0	0.2702	0.073008	62.5323	0	0	6	2	3	0	0	0	0	0	0	0	2903.66	241.605	99.522	78.2343	76.6361	47.4262	35.0001	24.3365	26.845	193.444	152.612	119.549	95.8719	7.98504	7.87719	8.1292	7.94044	7.60052	7.75084	162.737	147.864	156.062	158.893	0.579897	-0.387286	0.363829	-0.605979	0.491942	-0.163596	0.0404925
78273	C1(CCCCC1)(C#C)O	1-Ethynylcyclohexanol	2.69	0	-0.3331	0.110956	30.2702	0	0	0	0	1	0	0	0	0	0	0	0	1422.27	0	71.2182	34.588	19.3149	10.4398	4.71307	1.01606	0	100.845	74.0896	58.968	31.0837	7.3475	7.37171	7.27089	7.06053	6.85152	6.71846	162.801	144.63	160.939	166.92	0.252755	-0.148524	0.033853	0.0373877	-0.0841013	0.0167229	0.0117191
868859	COP(=O)OC	Dimethyl hydrogen phosphite	2.69	0	0.2461	0.0605652	15.5367	0	0	0	0	3	0	1	0	0	0	0	0	2022.92	0	164.57	81.6833	18.0992	12.1071	1.01606	0	0	83.9044	114.737	31.0837	0	8.34543	7.79034	8.50028	7.11763	6.71846	0	170.334	149.704	147.936	182.027	0.399724	-0.232805	0.0604936	0.0603649	-0.128441	0.0147822	0.0257433
110587	C(CCN)CC	n-Amylamine	2.69	0	-1.551	2.4056	23.5678	0	0	0	1	0	0	0	0	0	0	0	0	930.725	0	50.3728	16.4039	14.9154	12.3104	5.11547	1.01606	0	83.0324	72.2196	53.4139	31.0837	7.11812	7.02334	7.03319	7.05043	7.08376	6.71846	171.007	152.804	170.894	172.685	0.158111	-0.0798179	-0.0123693	0.00924954	0.00170094	0.00582845	-0.0199446
497370	O[C@@H]1C[C@H]2CC[C@@H]1C2	Exo-norborneol	2.69	0	-0.2937	0.0862597	29.7889	0	0	0	0	1	0	0	0	0	0	0	0	1278.01	0	71.2182	21.8992	9.05038	3.96698	1.01606	0	0	60.08	44.3346	31.0837	0	7.33784	7.26795	7.16678	7.14022	6.71846	0	164.601	144.63	162.908	177.509	0.222041	-0.106236	-0.00755416	0.0077319	-0.0202297	0.00397124	0.0112961
75990	CC(Cl)(Cl)C(=O)O	Dalapon	2.69	1	0.8989	0.808021	27.623	0	0	0	0	2	0	0	0	2	0	0	2	3462.2	0	157.688	172.467	20.0374	1.01606	0	0	0	95.2378	31.0837	0	0	9.12274	9.57902	9.10656	6.71846	0	0	166.116	149.687	168.751	179.656	0.418608	-0.245798	-0.0346328	0.16165	-0.10879	0.0182679	0
115208	C(CO)(Cl)(Cl)Cl	2,2,2-Trichloroethanol	2.7	0	1.2395	1.53636	28.2158	0	0	0	0	1	0	0	0	3	0	0	3	4317.65	0	206.767	160.836	35.7336	0	0	0	0	125.161	0	0	0	9.42389	9.39089	9.0072	0	0	0	166.475	151.203	175.898	176.34	0.33828	-0.17834	-0.0966995	0.177751	-0.0718514	0	0
499832	c1(nc(ccc1)C(O)=O)C(O)=O	Dipicolinic acid	2.72	2	-0.2031	0.0412496	40.9315	0	0	6	1	4	0	0	0	0	0	0	0	2235	1.01606	119.958	98.5604	86.0251	83.8247	81.3457	11.09	1.01606	200.034	175.024	122.481	65.037	8.82261	8.50727	8.60152	8.71492	9.51421	8.5536	162.658	148.894	161.723	161.778	0.745833	-0.498508	0.00628165	0.341593	-0.162582	-0.296067	0.417714
75218	C1CO1	Ethylene oxide	2.72	0	-0.1309	0.0171348	11.0435	0	0	0	0	1	0	0	0	0	0	0	0	548.56	0	82.4315	1.01606	0	0	0	0	0	0	0	0	0	7.90094	6.71846	0	0	0	0	168.387	149.424	184.918	0	0.165099	-0.031526	-0.0648034	0.0137797	0	0	0
683727	C(C(Cl)Cl)(N)=O	2,2-Dichloroacetamide	2.73	0	0.5702	0.325128	22.8417	0	0	0	1	1	0	0	0	2	0	0	2	3257.15	0	174.574	221.414	24.1611	0	0	0	0	93.802	0	0	0	9.21567	9.85212	8.24429	0	0	0	171.261	160.53	178.957	179.199	0.337649	-0.186724	-0.0237312	0.0879299	-0.0462995	0	0
126114	C([N+](=O)[O-])(CO)(CO)CO	2-Hydroxymethyl-2-nitro-1,3-propanediol	2.73	0	-0.9709	0.942647	28.0234	0	0	0	1	5	0	0	0	0	0	0	0	2062.24	0	97.0412	77.3971	52.1843	8.57153	1.01606	0	0	97.0031	56.5487	31.0837	0	8.82045	8.38494	9.17847	8.09482	6.71846	0	174.207	159.678	167.288	182.299	0.705955	-0.270144	-0.24101	-0.026775	0.564876	-0.512028	0.132104
100641	C1CCC(=NO)CC1	(Hydroxyimino)cyclohexane	2.74	0	-1.0163	1.03287	26.7141	0	0	0	1	1	0	0	0	0	0	0	0	1328.93	0	73.4273	30.8454	21.4126	15.3008	6.9179	1.01606	0	89.1428	67.0093	57.5856	31.0837	7.5105	7.29816	7.5063	7.58729	7.56197	6.71846	167.976	149.408	166.233	174.303	0.171941	-0.0382074	-0.0533852	0.0141377	-0.014446	-0.00674032	-0.000501
1482151	C([C@@](C(C)C)(O)C)#C	3,4-Dimethyl-1-pentyn-3-ol	2.74	0	1.0321	1.06523	32.6321	0	0	0	0	1	0	0	0	0	0	0	0	1278.01	0	63.5291	41.9361	14.3186	3.41412	1.01606	0	0	96.4684	49.1709	31.0837	0	7.33784	7.54333	7.3279	6.80477	6.71846	0	164.601	146.507	156.883	166.209	0.250825	-0.155547	0.0476552	0.0586515	-0.143796	0.0502947	0.0173296
18368633	Clc1nc(ccc1)C	6-Chloro-2-picoline	2.74	0	1.2281	1.50823	36.7667	0	0	6	1	0	0	0	0	1	0	0	1	2324.58	0	111.159	78.3518	64.3736	17.6737	1.01606	0	0	150.922	95.7129	31.0837	0	7.70222	7.77378	7.49132	7.69588	6.71846	0	160.691	144.717	161.836	161.699	0.114471	-0.0760519	0.0513183	-0.0406319	0.0164224	-0.0140209	0.00572856
110190	C(COC(=O)C)(C)C	Isobutyl acetate	2.75	0	0.5033	0.253311	30.6961	0	0	0	0	2	0	0	0	0	0	0	0	1389.71	0	68.3597	31.6833	21.7424	38.8643	11.6712	1.01606	0	91.553	136.589	93.4368	31.0837	7.6284	7.71963	7.49278	7.43367	7.73305	6.71846	167.534	147.615	164.354	174.8	0.263117	-0.162117	0.082071	-0.0267094	-0.0628148	0.0671536	-0.0431521
868779	C(=O)(C(=C)C)OCCO	2-Hydroxyethyl methacrylate	2.76	0	0.6257	0.3915	32.7099	0	0	0	0	3	0	0	0	0	0	0	0	1643.65	5.08032	81.7113	55.9133	36.1109	50.7888	23.1168	6.76528	1.01606	121.66	161.501	93.2903	55.9046	8.02541	8.0428	8.26776	7.93448	7.3	7.57504	166.647	149.102	162.793	172.877	0.488194	-0.285844	-0.0257792	0.24329	-0.276211	0.120802	0.0185956
78591	C1(CC(=CC(=O)C1)C)(C)C	Isophorone	2.78	0	1.9489	3.79821	42.6464	0	0	0	0	1	0	0	0	0	0	0	0	1568.57	0	69.1683	38.5747	22.1859	13.3354	1.01606	0	0	91.7272	104.738	31.0837	0	7.30312	7.40067	7.04228	7.83677	6.71846	0	163.144	143.259	150.744	170.915	0.141006	-0.0510836	0.00280129	-0.0728331	0.13679	-0.113074	0.0268959
16879020	n1c(Cl)cccc1O	6-Chloropyridin-2-ol	2.78	0	1.2422	1.54306	33.2156	0	0	6	1	1	0	0	0	1	0	0	1	2434.25	0	131.995	97.34	108.463	20.1435	1.01606	0	0	159.185	95.6312	31.0837	0	8.35045	8.17601	8.41155	8.26433	6.71846	0	161.541	148.201	163.467	168.121	0.291508	-0.227381	0.164405	-0.12182	0.0685918	-0.0439665	0.0144169
108996	c1(cccnc1)C	3-Methylpyridine	2.81	0	0.165	0.027225	31.6683	0	0	6	1	0	0	0	0	0	0	0	0	1068.89	0	81.6105	42.0446	14.0302	6.56158	1.01606	0	0	88.2996	72.9102	31.0837	0	7.31957	7.33232	7.18788	6.91805	6.71846	0	161.888	145.225	155.305	173.975	0.103016	-0.0164186	-0.0373627	0.00598976	-0.0204368	0.00973125	0.00698913
79118	C(CCl)(O)=O	Chloroacetic acid	2.81	1	0.3027	0.0916273	17.3969	0	0	0	0	2	0	0	0	1	0	0	1	2060.21	0	142.103	153.384	12.5886	0	0	0	0	62.4429	0	0	0	9.25194	9.9836	7.48138	0	0	0	168.425	152.99	179.029	182.058	0.357707	-0.207102	0.0416446	-0.00438143	-0.00901529	0	0
105544	C(=O)(CCC)OCC	Ethyl n-butyrate	2.82	0	0.0597	0.00356409	29.6417	0	0	0	0	2	0	0	0	0	0	0	0	1389.71	9.14458	68.3597	32.8262	40.3315	22.7791	13.1188	4.71307	1.01606	132.636	114.255	89.6057	58.968	7.6284	7.64672	7.90729	7.96892	6.94769	6.85152	167.534	147.615	170.355	165.387	0.264975	-0.16267	0.0606311	-0.0224544	0.0341229	-0.0564706	0.00496102
106490	Cc1ccc(cc1)N	p-Toluidine	2.83	0	0.6531	0.42654	38.7876	0	0	6	1	0	0	0	0	0	0	0	0	1215.19	0	75.9456	42.91	17.0827	13.387	13.3143	1.01606	0	97.7266	70.4277	98.0744	31.0837	7.26185	7.34165	7.10539	6.94336	7.81436	6.71846	162.533	148.139	154.479	167.335	0.155281	-0.0830621	0.038488	-0.0419236	-0.0267332	0.0499877	-0.0351426
1080326	P(Cc1ccccc1)(OCC)(OCC)=O	Diethyl benzylphosphonate	2.83	0	1.4936	2.23084	63.6052	0	0	6	0	3	0	1	0	0	0	0	0	3331.46	584.35	117.1	66.2346	68.0037	47.1475	36.3098	21.3639	11.0255	176.201	147.15	140.312	116.03	7.61062	7.75383	7.80815	7.92116	7.40828	7.14326	162.646	143.67	161.13	156.415	0.428326	-0.280741	0.174254	-0.137991	0.0913056	-0.0338394	-0.0235151
920661	C(C(C(F)(F)F)O)(F)(F)F	Hexafluoroisopropanol	2.84	0	1.6855	2.84091	18.8317	0	0	0	0	1	0	0	6	0	0	0	6	2856.43	0	170.733	158.714	224.224	0	0	0	0	135.9	0	0	0	12.1175	11.2744	13.7472	0	0	0	229.749	174.76	214.924	276.902	0.779917	-0.370115	-0.129234	0.0686705	0.0407206	0	0
600362	C(C(C)C)(C(C)C)O	2,4-Dimethyl-3-pentanol	2.85	0	0.6351	0.403352	34.4981	0	0	0	0	1	0	0	0	0	0	0	0	1282.07	0	54.5862	31.2392	15.1631	6.56158	1.01606	0	0	86.9381	72.9102	31.0837	0	7.23461	7.32949	7.36055	6.91805	6.71846	0	167.987	147.658	160.783	172.379	0.228926	-0.117705	-0.00728102	0.0750225	-0.118265	0.034123	0.0196426
75354	C(=C)(Cl)Cl	1,1-Dichloroethylene	2.86	0	1.688	2.84934	20.4606	0	0	0	0	0	0	0	0	2	0	0	2	2803.97	0	204.012	35.7336	0	0	0	0	0	0	0	0	0	8.7782	9.0072	0	0	0	0	159.957	145.016	176.34	0	0.0603779	-0.0514002	0.0462302	-0.0250189	0	0	0
110123	C(CCC(C)=O)(C)C	5-Methyl-2-hexanone	2.86	0	0.6094	0.371368	34.0392	0	0	0	0	1	0	0	0	0	0	0	0	1280.04	0	58.4404	24.5173	17.2625	25.1013	11.6712	1.01606	0	87.7357	98.2236	93.4368	31.0837	7.28154	7.359	7.06501	7.1736	7.73305	6.71846	166.448	145.611	162.222	170.915	0.129413	-0.0438196	0.0155956	-0.0498397	-0.00580463	0.0577416	-0.051537
1122549	c1(ccncc1)C(C)=O	4-Acetylpyridine	2.86	0	-0.7309	0.534215	36.9366	0	0	6	1	1	0	0	0	0	0	0	0	1469.13	0	92.4359	60.3696	45.4295	26.4788	5.38373	0	0	156.783	94.0529	49.7112	0	7.71039	7.8068	7.64981	7.50364	7.23859	0	161.167	144.58	156.894	156.863	0.211184	-0.0613579	-0.0214932	-0.00351274	-0.066805	0.0566651	-0.00908843
96800	N(CCO)(C(C)C)C(C)C	Monoethanoldiisopropylamine	2.86	0	-0.3195	0.10208	45.2776	0	0	0	1	1	0	0	0	0	0	0	0	1625.58	0	59.0091	32.8666	26.7495	15.2009	3.90959	1.01606	0	124.059	85.828	43.209	31.0837	7.29408	7.45947	7.12273	7.12204	7.16243	6.71846	169.81	150.703	168.899	161.189	0.322808	-0.119734	-0.0362992	-0.00358049	-0.0397773	0.059371	-0.0831722
107062	C(CCl)Cl	Ethylene dichloride	2.86	0	1.5118	2.28554	20.6556	0	0	0	0	0	0	0	0	2	0	0	2	2806	0	149.182	155.967	0	0	0	0	0	0	0	0	0	8.26327	8.33092	0	0	0	0	166.197	147.332	179.243	0	0.078908	-0.00462235	-0.039454	0.00462235	0	0	0
98862	c1(ccccc1)C(=O)C	Acetophenone	2.87	0	0.9539	0.909925	40.5061	0	0	6	0	1	0	0	0	0	0	0	0	1418.21	0	84.8902	52.5235	39.8094	23.1321	6.42288	1.01606	0	149.439	103.408	66.133	31.0837	7.4955	7.57752	7.51038	7.34872	7.11386	6.71846	157.597	140.746	154.397	157.46	0.1513	-0.050194	-0.0198806	-0.000566	0.00200805	-0.000356	-0.012494
123546	C(CC(C)=O)(C)=O	Acetyl acetone	2.87	0	-0.473	0.223729	26.09	0	0	0	0	2	0	0	0	0	0	0	0	1241.39	0	75.5887	39.7999	39.518	14.117	1.01606	0	0	104.854	98.3751	31.0837	0	7.87691	8.37653	7.46761	8.2944	6.71846	0	165.614	145.632	164.306	170.758	0.229796	-0.0611945	0.0389824	-0.178605	0.13377	-0.0564569	0.00860558
15045439	C1(OC(C)(C)CC1)(C)C	2,2,5,5-Tetramethyltetrahydrofuran	2.88	0	1.5453	2.38795	38.0587	0	0	0	0	1	0	0	0	0	0	0	0	1426.34	0	63.5156	28.9385	12.9123	6.56158	1.01606	0	0	85.5276	72.9102	31.0837	0	7.24685	7.73393	6.92438	6.91805	6.71846	0	166.34	145.768	159.834	168.893	0.161932	-0.0725649	0.110877	-0.179457	0.0401778	-0.00404574	0.0240474
107299	C(=N\O)/C	Acetaldehyde oxime	2.89	0	-0.1406	0.0197684	15.2532	0	0	0	1	1	0	0	0	0	0	0	0	745.773	0	75.1444	29.5337	12.3008	1.01606	0	0	0	78.3723	31.0837	0	0	8.02519	7.95718	8.44992	6.71846	0	0	174.985	160.757	182.147	178.719	0.165436	-0.0312387	-0.0498967	-0.0131741	-0.00984284	0.0214344	0
110861	c1ccncc1	Pyridine	2.9	0	-0.2814	0.079186	27.3863	0	0	6	1	0	0	0	0	0	0	0	0	922.597	0	88.5516	34.4662	7.4013	1.01606	0	0	0	74.472	31.0837	0	0	7.40878	7.30732	7.06925	6.71846	0	0	160.891	145.464	163.364	172.2	0.104362	-0.0162335	-0.0383373	-0.00935771	0.0011331	0.0106146	0
932161	c1(n(ccc1)C)C(C)=O	2-Acetyl-1-methyl pyrrole	2.9	0	-0.1706	0.0291044	38.5717	0	0	5	1	1	0	0	0	0	0	0	0	1471.16	0	84.8424	55.1723	41.2146	9.25996	1.01606	0	0	148.274	82.0048	31.0837	0	7.60017	7.77068	7.57756	7.4096	6.71846	0	163.806	147.577	157.845	160.041	0.208055	-0.0574421	-0.0815505	0.0506437	0.0209361	-0.0609533	0.0243385
91236	c1(c(cccc1)[N+](=O)[O-])OC	2-Nitroanisole	2.9	0	1.1181	1.25015	40.817	0	0	6	1	3	0	0	0	0	0	0	0	1981.06	0	108.394	86.7117	77.5239	44.2674	10.1967	1.01606	0	175.391	132.1	72.3088	31.0837	8.3372	8.11059	8.52229	8.15239	8.03059	6.71846	163.865	149.935	156.707	163.624	0.226192	-0.0454793	-0.126784	0.00811356	0.117004	-0.0330511	-0.0428123
108656	O([C@@H](COC)C)C(C)=O	Methoxyisopropyl acetate	2.91	0	-0.1205	0.0145203	33.0407	0	0	0	0	3	0	0	0	0	0	0	0	1645.68	9.14458	76.9449	44.261	39.8761	27.4509	13.9224	13.4471	1.01606	129.836	109.876	64.4533	103.829	7.90094	8.26062	7.60535	7.88253	7.14325	7.90214	168.387	149.229	166.585	165.114	0.420109	-0.189921	-0.0145408	0.0269552	-0.0617762	0.0228257	0.0256012
15128822	c1(c(cccn1)O)[N+](=O)[O-]	3-Hydroxy-2-nitropyridine	2.92	0	0.9238	0.853406	34.1045	0	0	6	2	3	0	0	0	0	0	0	0	1885.68	0	126.756	103.615	92.951	43.7049	11.09	0	0	167.93	117.695	65.037	0	8.93106	8.66038	9.01573	9.04007	8.5536	0	168.034	156.564	166.122	173.888	0.358583	-0.160276	-0.146356	0.159341	0.0515246	-0.0858119	0.00228707
75898	C(C(F)(F)F)O	Trifluoroethanol	2.93	0	0.6494	0.42172	13.7114	0	0	0	0	1	0	0	3	0	0	0	3	1630.36	0	132.667	86.7423	19.1504	0	0	0	0	74.1835	0	0	0	10.732	10.5509	10.368	0	0	0	211.606	170.016	221.357	236.923	0.475981	-0.267496	-0.107567	0.243199	-0.106126	0	0
78795	C(C=C)(C)=C	Isoprene	2.93	0	1.8614	3.46481	24.5764	0	0	0	0	0	0	0	0	0	0	0	0	729.449	0	56.1594	25.5589	6.00702	1.01606	0	0	0	68.7275	31.0837	0	0	7.03464	7.12027	6.89809	6.71846	0	0	162.563	144.346	153.73	170.61	0.0458635	-0.00995245	-0.00112334	-0.0195808	-0.0126744	0.0203992	0
123115	COc1ccc(C=O)cc1	p-Anisaldehyde	2.93	0	0.5168	0.267082	42.6731	0	0	6	0	2	0	0	0	0	0	0	0	1674.18	51.4292	93.511	66.4799	42.3857	28.3321	38.2314	48.1185	8.57153	148.897	105.686	104.386	152.335	7.82085	7.73543	7.71213	7.40808	7.66892	7.70088	159.144	142.921	151.266	159.026	0.283928	-0.0733351	-0.0760848	0.0397156	-0.0410629	-0.0715132	0.0943869
598787	CC(C(=O)O)Cl	2-Chloropropanoic acid	2.93	1	0.3987	0.158962	22.0564	0	0	0	0	2	0	0	0	1	0	0	1	2206.51	0	116.32	101.513	16.1799	1.01606	0	0	0	84.7848	31.0837	0	0	8.63572	8.79553	8.85226	6.71846	0	0	167.639	150.397	171.276	180.609	0.359916	-0.22138	0.0344562	0.0638759	-0.0737981	0.0168883	0
110430	C(CCCC)C(C)=O	2-Heptanone	2.94	0	-1.0318	1.06461	29.9531	0	0	0	0	1	0	0	0	0	0	0	0	1280.04	9.14458	58.4404	23.131	20.7439	20.439	19.9055	8.47466	1.01606	99.8754	96.6051	90.8821	74.7309	7.28154	7.3091	7.13927	7.18074	7.25331	7.42867	166.448	145.611	166.196	167.914	0.130043	-0.0429136	0.0071389	-0.0342343	0.00094	0.00257962	0.0173197
34723825	O1[C@@H](CBr)CCCC1	2-(Bromomethyl)tetrahydro-2H-pyran	2.94	0	-0.1565	0.0244923	31.7753	0	0	0	0	1	0	0	0	0	1	0	1	7517.38	0	115.713	71.2254	64.6032	58.4588	27.5251	0	0	110.349	88.3214	70.0114	0	7.51894	7.53294	7.23971	7.16274	7.26019	0	164.204	145.16	165.439	166.843	0.195671	-0.0402598	-0.0817479	0.011873	0.00733915	0.00749959	-0.00253948
78875	C([C@@H](C)Cl)Cl	1,2-Dichloropropane	2.95	0	1.5011	2.2533	25.24	0	0	0	0	0	0	0	0	2	0	0	2	2952.29	0	121.275	109.028	12.5886	0	0	0	0	62.4429	0	0	0	7.91669	8.04676	7.48138	0	0	0	166.019	146.436	170.134	182.058	0.080544	-0.0142698	-0.0281562	0.00719109	-0.00503711	0	0
2859678	c1(cccnc1)CCCO	3-Pyridinepropanol	2.96	0	-1.1513	1.32549	41.22	0	0	6	1	1	0	0	0	0	0	0	0	1617.45	31.2823	79.7946	38.5212	30.9458	35.7196	31.5654	21.3027	6.25645	124.817	128.233	106.966	85.9352	7.51336	7.34122	7.35513	7.36112	7.62757	7.42809	164.054	146.887	161.157	166.365	0.312717	-0.112873	-0.0633374	0.0171117	-0.0164429	0.0045617	0.052722
51235042	Cn1c(nc(=O)n(c1=O)C2CCCCC2)N(C)C	Hexazinone	2.96	0	-3.3055	10.9263	51.0579	0	0	0	4	2	0	0	0	0	0	0	0	3049.23	1148.98	83.9198	56.9059	49.6966	44.5425	29.1907	28.377	20.5176	142.588	141.37	112.56	124.461	7.66882	7.64085	7.86545	7.75031	7.92345	7.42544	169.761	153.195	162.777	173.17	0.718533	-0.712575	0.8647	-0.778556	0.210879	0.244643	-0.192484
111911	C(OCCCl)OCCCl	Bis(2-chloroethoxy)methane	2.97	0	1.2323	1.51856	37.5521	0	0	0	0	2	0	0	0	2	0	0	2	3756.82	1403.7	112.769	70.6538	61.9866	70.2857	73.1177	58.3928	155.967	137.903	126.826	159.316	118.458	8.19694	8.17154	7.81066	8.192	7.36268	7.62954	167.914	149.457	168.796	166.823	0.389373	-0.110332	-0.120493	0.062472	-0.0817719	0.0494588	0.02657
769288	n1c(cc(C)c(c1O)C#N)C	3-Cyano-4,6-dimethyl-2-hydroxypyridine	2.98	0	1.1322	1.28188	43.4343	0	0	6	2	1	0	0	0	0	0	0	0	1810.6	0	95.137	79.7438	58.9873	23.5734	11.0408	14.1191	0	164.751	116.938	58.128	86.9662	7.78036	7.86158	7.66409	8.07765	6.88095	8.27885	163.244	146.785	154.782	159.798	0.370018	-0.202301	0.0652643	-0.208062	0.328691	-0.224758	0.0787553
5683330	c1(ccccn1)N(C)C	2-Dimethylaminopyridine	2.98	0	-0.5192	0.269569	39.9273	0	0	6	2	0	0	0	0	0	0	0	0	1412.4	0	81.0167	50.957	28.2422	19.3644	5.45247	1.01606	0	122.272	114.899	64.5449	31.0837	7.38797	7.48864	7.37887	7.08736	6.87813	6.71846	166.275	150.352	158.465	171.335	0.177012	-0.0656001	0.00244262	0.0168749	-0.0766517	-0.0041078	0.0233993
999973	[Si](N[Si](C)(C)C)(C)(C)C	Hexamethyldisilazane	2.99	0	3.888	15.1165	37.977	0	0	0	1	0	0	0	0	0	0	0	0	2658.62	0	112.696	42.2214	19.0011	12.1071	1.01606	0	0	100.431	114.737	31.0837	0	6.86563	7.32099	6.57924	7.11763	6.71846	0	164.941	138.576	159.688	166.167	0.134901	-0.0626764	0.112794	-0.217462	0.110955	-0.0627458	0.0516852
1072975	n1c(N)ccc(c1)Br	2-Amino-5-bromopyridine	2.99	0	0.6135	0.376382	37.9853	0	0	6	2	0	0	0	0	0	1	0	1	7503.44	0	162.004	151.215	88.4371	143.564	80.5432	0	0	137.15	99.8242	147.867	0	7.85078	7.94565	7.57676	7.26363	8.34365	0	163.124	152.756	162.759	168.25	0.21826	-0.146133	0.096022	-0.0543981	-0.0689042	0.0891124	-0.0248291
88755	c1(c(cccc1)O)[N+](=O)[O-]	2-Nitrophenol	3	0	1.0536	1.11007	35.779	0	0	6	1	3	0	0	0	0	0	0	0	1834.77	0	115.916	85.2117	75.9812	37.6065	11.09	0	0	151.586	105.322	65.037	0	8.60615	8.18959	8.80108	8.70842	8.5536	0	163.53	151.42	159.055	171.184	0.270885	-0.116077	-0.0635916	0.0135282	0.104978	-0.0720815	-0.00219917
142289	C(CCl)CCl	1,3-Dichloropropane	3.01	0	1.2238	1.49769	23.5672	0	0	0	0	0	0	0	0	2	0	0	2	2952.29	0	121.275	58.3928	155.967	0	0	0	0	125.439	0	0	0	7.91669	7.62954	8.33092	0	0	0	166.019	146.436	171.624	179.243	0.0773193	-0.0098119	-0.0180347	-0.0161546	0.00534155	0	0
5600215	c1(cc(nc(n1)N)Cl)C	2-Amino-4-chloro-6-methylpyrimidine	3.01	0	0.1559	0.0243048	34.9478	0	0	6	3	0	0	0	0	1	0	0	1	2572.71	0	118.429	94.2851	102.991	20.3706	1.01606	0	0	174.037	105.845	31.0837	0	8.04626	8.20767	7.82511	8.21615	6.71846	0	169.69	156.831	169.333	162.652	0.283899	-0.270438	0.320879	-0.300992	0.170696	-0.1017	0.0396063
70699	c1(ccc(N)cc1)C(CC)=O	4-Aminopropiophenone	3.01	0	-0.1666	0.0277556	49.0794	0	0	6	1	1	0	0	0	0	0	0	0	1761.72	70.6356	81.6355	53.7667	40.4723	31.1916	27.6818	18.4601	7.8484	149.864	127.422	106.466	88.6972	7.5146	7.55568	7.65001	7.31622	7.22313	7.51061	162.361	146.888	158.091	161.109	0.267765	-0.136626	0.0160596	0.0223408	-0.0491935	-0.0519404	0.131051
98953	c1ccc(cc1)[N+](=O)[O-]	Nitrobenzene	3.01	0	1.6167	2.61372	34.1735	0	0	6	1	2	0	0	0	0	0	0	0	1578.8	0	110.182	67.6519	54.712	51.6652	16.127	0	0	136.597	120.294	82.0136	0	8.26718	7.79626	8.29053	8.85202	9.47117	0	161.964	148.992	159.49	170.917	0.0840367	-0.019216	-0.0365885	0.0204155	0.0133999	-0.00431135	-0.0157178
111273	CCCCCCO	1-Hexanol	3.02	0	-1.5494	2.40064	24.8219	0	0	0	0	1	0	0	0	0	0	0	0	1135.78	3.04819	54.3502	18.7401	18.0197	16.867	14.7263	5.71805	1.01606	90.8148	84.4993	72.7705	50.7873	7.26921	7.1033	7.13009	7.17295	7.25255	7.4399	168.336	148.155	168.715	169.727	0.229977	-0.100501	-0.0340428	0.0152186	0.000959	0.00114892	0.00999189
100469	c1(ccccc1)CN	Benzylamine	3.02	0	0.4695	0.22043	38.67	0	0	6	1	0	0	0	0	0	0	0	0	1215.19	0	75.9456	38.9046	24.954	14.5693	4.93662	1.01606	0	114.614	80.4468	55.8824	31.0837	7.26185	7.18512	7.21971	7.11682	6.98054	6.71846	162.533	148.139	157.48	165.199	0.177461	-0.0822349	-0.020192	0.031749	-0.0277952	-0.005225	0.000329
13909734	CC(=O)c1c(OC)c(OC)c(OC)cc1	2',3',4'-Trimethoxyacetophenone	3.02	0	-0.5419	0.293656	60.4366	0	0	6	0	4	0	0	0	0	0	0	0	2625	139.313	92.0262	95.3954	80.0713	46.211	26.1931	11.5773	5.15973	208.096	152.007	114.852	70.8061	7.94521	8.27474	8.15674	8.07596	7.6836	7.1942	162.944	145.913	150.61	151.909	0.561861	-0.160405	-0.279477	0.195284	0.149433	-0.25008	0.0136272
584849	Cc1ccc(cc1N=C=O)N=C=O	Toluene 2,4-diisocyanate	3.02	0	-0.3134	0.0982196	48.7762	0	0	6	2	2	0	0	0	0	0	0	0	2208.8	304.349	112.62	82.5655	66.9742	66.2252	83.7434	89.8486	76.0872	188.968	165.248	179.807	190.63	8.17274	7.75364	7.80657	8.00777	9.1867	8.70367	160.213	145.664	152.562	160.675	0.478516	-0.35412	0.176333	-0.100158	0.0960843	-0.122794	0.173756
100618	c1(ccccc1)NC	N-Methylaniline	3.03	0	0.6385	0.407682	39.2802	0	0	6	1	0	0	0	0	0	0	0	0	1215.19	0	77.2374	41.1211	25.8734	13.2146	5.04916	1.01606	0	124.982	88.2833	61.503	31.0837	7.26185	7.27727	7.21095	7.00299	6.86362	6.71846	162.533	147.688	159.607	162.264	0.140926	-0.0449611	-0.0210174	0.000115	-0.0242814	-0.00220222	0.0145594
100016	c1([N+](=O)[O-])ccc(N)cc1	4-Nitroaniline	3.04	0	0.42	0.1764	37.7233	0	0	6	2	2	0	0	0	0	0	0	0	1776.01	0	107.933	71.6619	47.4668	45.0228	119.109	16.127	0	129.759	106.187	158.212	82.0136	8.29129	7.92427	8.06889	8.18001	9.97486	9.47117	166.478	155.732	160.216	171.66	0.195438	-0.101252	0.0245128	-0.00289915	-0.0649328	0.0191606	0.0905927
108010	CN(C)CCO	Deanol	3.04	0	-0.2193	0.0480925	26.2804	0	0	0	1	1	0	0	0	0	0	0	0	1040.4	0	61.1463	26.1678	15.0802	6.65844	1.01606	0	0	70.9644	54.728	31.0837	0	7.50697	7.45208	7.05688	7.58419	6.71846	0	172.821	155.47	164.325	174.685	0.317475	-0.0968557	-0.137228	0.0869664	0.0104112	-0.0714073	0.0493762
16672870	C(P(=O)(O)O)CCl	Ethephon	3.05	2	-0.5047	0.254722	24.5313	0	0	0	0	3	0	1	0	1	0	0	1	3278.61	0	209.117	83.2488	114.222	12.5886	0	0	0	116.73	62.4429	0	0	8.75752	8.57143	8.92172	7.48138	0	0	169.045	150.182	172.153	179.483	0.514442	-0.396716	0.37552	-0.380759	0.176404	-0.0316705	0
150765	COc1ccc(O)cc1	Mequinol	3.05	0	0.3417	0.116759	39.2048	0	0	6	0	2	0	0	0	0	0	0	0	1529.91	3.04819	90.762	61.211	35.0357	24.7313	22.7917	15.122	1.01606	135.046	94.4464	83.2232	90.1944	7.83734	7.91746	7.67516	7.24455	7.37898	8.88278	161.047	145.755	155.304	160.938	0.340284	-0.153315	0.0179388	-0.0264979	-0.134198	0.198519	-0.0591008
110009	c1ccoc1	Furan	3.05	0	-0.2605	0.0678602	20.7397	0	0	5	0	1	0	0	0	0	0	0	0	837.089	0	96.1721	9.81315	1.01606	0	0	0	0	31.0837	0	0	0	7.82085	7.43668	6.71846	0	0	0	159.144	144.396	167.623	184.918	0.136858	-0.0282002	-0.0410718	-0.0186676	0.0195105	0	0
75978	C(C(=O)C)(C)(C)C	3,3-Dimethyl-2-butanone	3.06	0	1.3023	1.69599	29.8972	0	0	0	0	1	0	0	0	0	0	0	0	1133.75	0	58.8205	36.4328	7.23156	1.01606	0	0	0	67.4563	31.0837	0	0	7.32718	7.55553	7.3103	6.71846	0	0	166.591	145.821	153.581	174.364	0.12452	-0.0534995	0.00730076	0.0288497	-0.0649492	0.0200382	0
150787	c1(ccc(OC)cc1)OC	Hydroquinone dimethyl ether	3.07	0	0.4062	0.164998	44.2428	0	0	6	0	2	0	0	0	0	0	0	0	1676.21	72.6425	87.7656	64.9853	39.6896	22.801	23.4582	34.4323	12.1071	155.765	101.042	83.3442	130.8	7.71061	7.86734	7.622	7.16283	7.16976	9.19536	161.722	145.268	153.394	155.84	0.295287	-0.0832992	-0.0422988	-0.00278827	-0.154653	0.170105	0.035707
62533	c1ccc(cc1)N	Aniline	3.08	0	0.2067	0.0427249	34.5056	0	0	6	1	0	0	0	0	0	0	0	0	1068.89	0	80.1855	38.8428	15.6784	4.93662	1.01606	0	0	88.8121	55.8824	31.0837	0	7.31957	7.32966	7.15674	6.98054	6.71846	0	161.888	148.951	159.455	170.819	0.15715	-0.0840143	0.0280373	-0.0286708	-0.0139077	0.004587	0.0153933
4916578	n1ccc(CCc2ccncc2)cc1	1,2-Bis(4-pyridyl)ethane	3.09	0	-0.8292	0.687573	62.0632	0	0	12	2	0	0	0	0	0	0	0	0	2135.75	834.414	89.0794	47.5548	35.0039	35.222	50.0141	51.7067	34.7672	149.532	136.71	176.574	176.365	7.36581	7.30409	7.1528	7.18465	7.35707	7.35718	160.116	143.957	155.145	156.678	0.202243	-0.0277191	-0.0640418	-0.0578686	0.0316339	0.0271318	-0.0332864
123251	C(CCC(OCC)=O)(OCC)=O	Butanedioic acid, diethyl ester	3.09	0	0.5928	0.351412	41.6628	0	0	0	0	4	0	0	0	0	0	0	0	2192.21	530.48	81.7522	45.1673	58.1407	48.0937	31.1751	36.3475	29.4711	169.47	134.141	107.148	108.128	7.9919	8.05997	8.43517	8.05653	7.23082	7.96041	167.116	147.91	170.006	160.921	0.5132	-0.306655	0.180757	-0.040113	-0.371841	0.357793	0.00398625
50000	C=O	Formaldehyde	3.1	0	-0.8841	0.781633	6.307	0	0	0	0	1	0	0	0	0	0	0	0	402.264	0	72.1261	0	0	0	0	0	0	0	0	0	0	8.58229	0	0	0	0	0	170.52	153.196	0	0	0.125302	-0.0113512	-0.0512999	0	0	0	0
2439772	COc1ccccc1C(=O)N	2-Methoxybenzamide	3.1	0	0.0744	0.00553536	43.8207	0	0	6	1	2	0	0	0	0	0	0	0	1871.39	0	93.3783	74.3551	65.8954	34.5221	8.76929	1.01606	0	177.524	125.803	73.2558	31.0837	7.88477	7.90324	8.05755	7.74283	7.50484	6.71846	163.038	148.919	153.989	158.942	0.402398	-0.221545	0.0479527	-0.122034	0.23367	-0.125961	-0.0796043
619807	c1(C(N)=O)ccc([N+](=O)[O-])cc1	Benzamide, 4-nitro-	3.1	0	0.7863	0.618268	40.3949	0	0	6	2	3	0	0	0	0	0	0	0	2176.24	64.508	114.631	83.4869	64.947	47.4997	83.29	164.728	16.127	164.138	124.421	143.204	177.605	8.53071	8.10113	8.39411	8.25257	8.30494	11.1005	165.328	153.991	157.019	166.893	0.307057	-0.209673	0.088234	0.0479872	-0.00246379	-0.14167	-0.0234279
58082	c12c(n(c(=O)n(c1=O)C)C)ncn2C	Caffeine	3.11	0	-1.9501	3.80289	42.1536	0	0	5	4	2	0	0	0	0	0	0	0	2460.99	0	105.782	99.9047	68.7865	43.038	13.8784	2.90493	0	167.604	149.027	88.3252	37.45	8.12578	8.17307	8.50078	8.02812	7.4003	7.06255	169.975	155.67	155.284	172.768	0.646779	-0.495313	0.258797	-0.0844163	0.0552389	-0.0725447	-0.00215368
127662	O[C@@](C#C)(c1ccccc1)C	3-Hydroxy-3-phenyl-1-butyne	3.11	0	1.667	2.77889	48.1	0	0	6	0	1	0	0	0	0	0	0	0	1708.77	1.01606	83.8046	57.7255	39.8261	26.8821	13.2556	3.78882	1.01606	156.866	119.645	89.2606	51.997	7.42579	7.55634	7.41443	7.2157	7.06239	6.81826	157.265	142.123	151.597	156.188	0.278912	-0.159647	0.0235775	0.0526443	-0.0763669	0.0113381	-0.0173224
75070	CC=O	Acetaldehyde	3.12	0	-0.1825	0.0333063	11.7183	0	0	0	0	1	0	0	0	0	0	0	0	548.56	0	64.1427	8.57153	0	0	0	0	0	0	0	0	0	7.90094	8.09482	0	0	0	0	168.387	148.771	185.051	0	0.119106	-0.0251165	-0.0161053	-0.0183313	0	0	0
253521	c12c(cccc1)cnnc2	Phthalazine	3.12	0	0.9438	0.890758	43.6176	0	0	10	2	0	0	0	0	0	0	0	0	1552.6	0	103.496	65.4145	44.7416	27.9673	7.56756	0	0	155.218	102.208	59.025	0	7.56489	7.47635	7.4324	7.46488	7.49866	0	159.146	145.391	153.637	161.034	0.0998755	0.0126999	-0.0671933	-0.0220757	0.0261594	0.00937585	-0.00890381
95534	Cc1ccccc1N	o-Toluidine	3.12	0	0.6531	0.42654	38.7876	0	0	6	1	0	0	0	0	0	0	0	0	1215.19	0	75.9456	47.5238	19.0043	4.33478	1.01606	0	0	108.194	54.3254	31.0837	0	7.26185	7.34465	7.27663	6.88327	6.71846	0	162.533	148.139	154.409	166.54	0.155624	-0.0848633	0.0289151	0.00596117	-0.0730907	0.0246711	0.0205948
109524	C(C(=O)O)CCC	Pentanoic acid	3.12	1	-0.7297	0.532462	23.4904	0	0	0	0	2	0	0	0	0	0	0	0	1243.42	0	67.9047	26.0857	26.0055	28.0774	12.3224	1.01606	0	98.0714	91.1739	74.3318	31.0837	7.74063	7.48499	7.52058	7.78726	8.59795	6.71846	167.885	148.572	168.929	171.045	0.314026	-0.222029	0.124492	-0.0700973	0.00919488	0.0302231	-0.0440378
22367766	c1(c(cccc1)O)CCC(N)=O	2-Hydroxybenzenepropanamide	3.13	0	0.1071	0.0114704	48.1973	0	0	6	1	2	0	0	0	0	0	0	0	2017.69	60.5566	86.6159	51.2759	40.0508	39.472	53.7713	28.8418	6.05566	143.202	128.484	132.605	104.88	7.76838	7.70091	7.6691	7.47755	7.8416	8.07679	163.365	148.563	158.804	162.843	0.44077	-0.285154	0.156112	-0.0632904	-0.0746479	-0.0841191	0.317467
64197	C(=O)(C)O	Acetic acid, glacial	3.13	1	-0.2299	0.052854	12.6437	0	0	0	0	2	0	0	0	0	0	0	0	804.529	0	83.0058	15.6245	1.01606	0	0	0	0	31.0837	0	0	0	8.58229	9.17698	6.71846	0	0	0	170.52	154.005	181.177	184.918	0.298931	-0.218512	0.160815	-0.113846	0.0220772	0	0
65452	c1(c(cccc1)O)C(=O)N	Salicylamide	3.13	0	0.0099	9.8e-05	38.7827	0	0	6	1	2	0	0	0	0	0	0	0	1725.09	0	97.3652	71.8528	62.8657	26.2384	5.59752	1.01606	0	154.907	100.934	56.0036	31.0837	8.04223	7.95199	8.1994	8.03483	7.18314	6.71846	162.596	150.051	155.771	164.145	0.447261	-0.291898	0.108868	-0.131173	0.266251	-0.243805	0.0523253
625865	c1(oc(C)cc1)C	2,5-Dimethylfuran	3.14	0	0.7669	0.588136	32.3767	0	0	5	0	1	0	0	0	0	0	0	0	1129.68	0	80.167	36.0069	15.2314	6.56158	1.01606	0	0	105.54	72.9102	31.0837	0	7.4895	7.99244	7.02372	6.91805	6.71846	0	161.704	144.376	161.078	160.953	0.124695	-0.0480554	0.0515119	-0.0959903	0.0137166	0.00842661	0.00804298
112801	C(CC\C=C/CCCCCCCC)CCCCC(O)=O	Oleic acid	3.14	1	-2.3427	5.48824	68.917	0	0	0	0	2	0	0	0	0	0	0	0	3143.24	2416.4	61.3675	24.222	24.2684	24.4445	24.6484	24.8872	25.1709	113.854	113.999	114.167	114.365	7.23816	7.12042	7.10864	7.11753	7.12782	7.13987	165.563	145.291	164.766	164.794	0.379847	-0.221852	0.0915056	-0.0691135	0.00625862	0.00102609	0.00233979
76222	CC1(C)[C@@H]2CC[C@@]1(C)C(=O)C2	Camphor	3.14	0	0.9693	0.939542	43.7625	0	0	0	0	1	0	0	0	0	0	0	0	1714.87	0	70.4565	44.4762	14.6536	2.5085	0	0	0	96.5541	36.1139	0	0	7.2686	7.35864	7.23391	6.99034	0	0	163.41	142.787	152.19	163.233	0.13585	-0.0505136	-0.0171252	0.0223331	-0.0148136	-0.0078055	0
464493	CC1(C)[C@@H]2CC[C@@]1(C)C(=O)C2	(R)-(+)-Camphor	3.14	0	0.9693	0.939542	43.7625	0	0	0	0	1	0	0	0	0	0	0	0	1714.87	0	70.4565	44.4762	14.6536	2.5085	0	0	0	96.5541	36.1139	0	0	7.2686	7.35864	7.23391	6.99034	0	0	163.41	142.787	152.19	163.233	0.13585	-0.0505136	-0.0171252	0.0223331	-0.0148136	-0.0078055	0
314409	n1(c(c(c(C)[nH]c1=O)Br)=O)[C@@H](CC)C	Bromacil	3.15	0	-0.9611	0.923713	47.9203	0	0	0	2	2	0	0	0	0	1	0	1	8600.56	87.8835	118.898	132.482	86.3102	82.9129	58.2452	23.3954	4.18493	167.909	137.621	137.657	110.831	7.87679	7.93469	7.89315	8.18096	7.80456	7.18871	165.853	150.144	163.353	162.097	0.556898	-0.469342	0.364277	-0.298681	0.239798	-0.0943437	-0.0352857
496162	c12c(OCC1)cccc2	Coumaran	3.17	0	0.8741	0.764051	39.8465	0	0	6	0	1	0	0	0	0	0	0	0	1418.21	0	90.8499	45.9859	32.8842	7.06502	1.01606	0	0	142.209	73.3893	31.0837	0	7.4955	7.48039	7.39822	7.05242	6.71846	0	157.597	141.446	156.87	157.451	0.16478	-0.0475085	-0.0310214	0.0100338	-0.0273023	-0.0049998	0.0184084
110930	C(=C\CCC(C)=O)(\C)C	Methylheptenone	3.17	0	1.5927	2.53669	39.8741	0	0	0	0	1	0	0	0	0	0	0	0	1424.31	18.2892	62.3415	30.5814	21.7244	22.4019	28.4665	13.4471	1.01606	102.938	103.273	105.406	103.829	7.2928	7.45259	7.12042	7.10016	7.1423	7.90214	164.724	144.755	158.231	167.504	0.14018	-0.0362416	0.0107563	-0.0698453	0.0116024	-0.000883	0.0578585
104905	c1(ccc(C)nc1)CC	2-Methyl-5-ethylpyridine	3.17	0	-0.2316	0.0536386	40.9932	0	0	6	1	0	0	0	0	0	0	0	0	1361.49	9.14458	73.9751	42.8379	25.1601	15.6928	20.3474	6.56158	1.01606	125.294	89.8903	119.555	72.9102	7.22144	7.33124	7.20686	7.06046	7.05308	6.91805	162.984	144.961	159.37	161.997	0.102165	-0.0261019	-0.00291569	-0.0203198	-0.0165405	0.00555931	0.00451053
107073	C(CCl)O	2-Chloroethanol	3.18	0	0.3072	0.0943718	17.6046	0	0	0	0	1	0	0	0	1	0	0	1	1806.28	0	103.347	57.4241	12.5886	0	0	0	0	62.4429	0	0	0	8.23341	8.09023	7.48138	0	0	0	170.199	152.979	180.189	182.058	0.249787	-0.100337	-0.0684776	0.0577896	-0.0138685	0	0
124049	C(CCCCC(O)=O)(O)=O	Adipic acid	3.18	2	-0.986	0.972196	29.3602	0	0	0	0	4	0	0	0	0	0	0	0	1899.62	64.508	85.2151	35.9165	36.6518	41.5817	51.4417	105.215	16.127	117.623	119.542	123.38	121.937	8.29173	7.85435	7.85511	8.1444	8.723	9.4516	167.587	149.615	167.636	169.408	0.607274	-0.439332	0.260429	-0.124316	0.0588419	0.0108819	-0.359022
470826	C[C@@]12CC[C@@H](CC1)C(C)(C)O2	Eucalyptol	3.18	0	1.3109	1.71846	44.0326	0	0	0	0	1	0	0	0	0	0	0	0	1716.9	0	68.1632	36.3514	17.0936	6.00702	1.01606	0	0	102.659	68.7275	31.0837	0	7.23066	7.57118	7.08633	6.89809	6.71846	0	164.894	144.361	158.375	164.73	0.167264	-0.0735276	0.0836667	-0.111467	-0.0177164	0.00254196	0.0328703
112050	C(CCCCC)CCC(=O)O	Nonanoic acid	3.18	1	-1.8817	3.54079	35.1368	0	0	0	0	2	0	0	0	0	0	0	0	1828.6	702.15	62.871	23.9441	23.6377	23.9337	24.3481	24.9696	26.0055	105.954	104.969	103.589	101.52	7.43105	7.2326	7.2158	7.25389	7.30723	7.38724	166.916	146.761	166.596	167.207	0.331007	-0.221971	0.116421	-0.068817	0.0057133	0.000251	-0.000407
110656	C(#CCO)CO	1,4-Butynediol	3.21	0	-0.307	0.094249	23.117	0	0	0	0	2	0	0	0	0	0	0	0	1095.09	0	81.6184	46.5615	57.1213	31.7049	6.05304	1.01606	0	161.735	81.6594	48.0604	31.0837	8.09802	7.47599	7.8467	8.39505	7.63603	6.71846	165.632	151.812	160.914	153.178	0.434452	-0.222338	-0.0333139	0.0746057	-0.0812626	0.103178	-0.10265
64675	S(OCC)(OCC)(=O)=O	Diethylsulfate	3.21	0	0.345	0.119025	31.323	0	0	0	0	4	1	0	0	0	0	0	0	2638.93	9.14458	158.091	72.045	67.3868	26.1351	17.96	4.71307	1.01606	161.65	115.926	113.015	58.968	8.3946	8.15166	9.0954	8.91802	7.03938	6.85152	168.71	147.546	168.234	164.574	0.369513	-0.362652	0.284629	-0.0369793	-0.0234233	-0.0793722	0.0157332
100470	c1(ccccc1)C#N	Benzonitrile	3.21	0	1.2425	1.54381	35.9343	0	0	6	1	0	0	0	0	0	0	0	0	1211.13	0	95.2786	52.4846	37.362	35.1026	14.1191	0	0	135.435	111.974	86.9662	0	7.42904	7.28389	7.39606	7.64716	8.27885	0	155.645	139.756	153.845	166.308	0.127262	-0.0391128	-0.0460832	0.0215212	0.014555	0.001381	-0.015892
578541	c1(c(cccc1)N)CC	2-Ethylaniline	3.21	0	0.318	0.101124	43.636	0	0	6	1	0	0	0	0	0	0	0	0	1361.49	0	72.9776	44.4992	29.2185	11.0723	3.23427	1.01606	0	133.839	83.0492	47.8143	31.0837	7.22144	7.25484	7.29723	7.08099	6.7983	6.71846	162.984	147.57	157.572	161.305	0.159798	-0.0865945	0.0247323	0.00938862	-0.0443837	-0.0247966	0.0374101
79005	C(CCl)(Cl)Cl	1,1,2-Trichloroethane	3.21	0	1.9555	3.82398	25.7097	0	0	0	0	0	0	0	0	3	0	0	3	4061.68	0	208.279	299.345	0	0	0	0	0	0	0	0	0	8.93291	9.18046	0	0	0	0	164.102	146.317	176.428	0	0.121907	-0.0263328	-0.0473557	0.012735	0	0	0
91225	c12c(cccc1)nccc2	Quinoline	3.22	0	0.3872	0.149924	45.8555	0	0	10	1	0	0	0	0	0	0	0	0	1501.69	0	95.5335	59.3534	40.9437	23.8221	5.94541	1.01606	0	164.079	124.266	68.2628	31.0837	7.35856	7.38504	7.32706	7.11825	6.89587	6.71846	155.695	141.129	154.377	158.294	0.1177	-0.0343943	-0.0281809	0.0279252	-0.0276423	-0.0181605	0.0124735
589162	c1(ccc(N)cc1)CC	4-Ethylaniline	3.22	0	0.318	0.101124	43.636	0	0	6	1	0	0	0	0	0	0	0	0	1361.49	6.09638	72.9776	40.9235	23.8365	15.8015	18.7934	7.8484	1.01606	121.067	87.2902	89.652	68.3007	7.22144	7.25252	7.15059	6.97394	7.23053	7.3273	162.984	147.57	157.627	162.031	0.159305	-0.084954	0.0360248	-0.0308256	-0.0372028	0.0389936	0.00183854
150196	COc1cccc(O)c1	3-Hydroxyanisole	3.23	0	0.3417	0.116759	39.2048	0	0	6	0	2	0	0	0	0	0	0	0	1529.91	0	90.762	61.211	43.6791	23.3235	9.41506	1.01606	0	138.255	101.85	78.6716	31.0837	7.83734	7.91746	7.71854	7.46079	7.57296	6.71846	161.047	145.755	155.304	160.938	0.342669	-0.149655	0.00311839	-0.0993129	0.157072	-0.1011	-0.0265494
67663	C(Cl)(Cl)Cl	Chloroform	3.23	0	1.6172	2.61534	21.3642	0	0	0	0	0	0	0	0	3	0	0	3	3915.39	0	322.369	0	0	0	0	0	0	0	0	0	0	10.0972	0	0	0	0	0	163.238	147.795	0	0	0.119972	-0.0659469	0.00596064	0	0	0	0
109604	O(C(C)=O)CCC	n-Propyl acetate	3.23	0	-0.3063	0.0938197	25.2386	0	0	0	0	2	0	0	0	0	0	0	0	1243.42	0	70.6472	30.9235	31.0559	26.202	8.47466	1.01606	0	121.404	110.815	74.7309	31.0837	7.74063	7.85952	7.74309	7.43159	7.42867	6.71846	167.885	148.227	171.13	167.344	0.259021	-0.159898	0.085069	-0.0416978	-0.0299485	0.0275555	-0.0175166
121573	S(c1ccc(N)cc1)(O)(=O)=O	Sulfanilic acid	3.24	1	-0.7816	0.610899	44.7527	0	0	6	1	3	1	0	0	0	0	0	0	2864.64	2.03213	169.471	87.5573	59.5028	53.5852	93.8833	15.8401	1.01606	144.483	113.134	142.209	82.7211	8.40405	8.04122	8.15573	8.1178	8.86203	9.30084	162.784	147.627	154.968	165.566	0.449791	-0.329651	0.171059	-0.0235067	-0.0619661	-0.110218	0.308048
100663	COc1ccccc1	Anisole	3.24	0	0.9048	0.818663	37.5993	0	0	6	0	1	0	0	0	0	0	0	0	1273.95	0	84.1731	49.9753	30.6547	14.7431	5.45247	1.01606	0	133.168	92.8941	64.5449	31.0837	7.49269	7.54291	7.43001	7.09447	6.87813	6.71846	159.522	143.277	155.434	159.435	0.170369	-0.0432218	-0.0392693	0.00643571	-0.0223543	-0.00927398	0.0125982
134623	c1(C(=O)N(CC)CC)cc(ccc1)C	Diethyltoluamide	3.24	0	1.7248	2.97494	61.4402	0	0	6	1	1	0	0	0	0	0	0	0	2200.61	264.495	75.6561	52.2198	44.5422	35.3766	25.971	19.1305	6.2975	156.953	139.2	123.692	112.67	7.36301	7.45375	7.559	7.46721	7.27019	7.02373	163.285	145.656	159.152	159.694	0.2396	-0.12773	0.00322518	0.0232586	0.0141149	0.0188262	-0.0780298
761659	N(CCCC)(CCCC)C=O	N,N-Dibutylformamide	3.25	0	-1.7299	2.99255	41.6621	0	0	0	1	1	0	0	0	0	0	0	0	1769.85	281.592	61.8103	28.7188	27.2772	27.3575	23.7778	12.1085	10.4293	111.087	113.461	111.462	78.2001	7.30229	7.19112	7.32249	7.37049	7.31623	7.21323	168.376	148.773	166.435	168.868	0.227679	-0.0873999	-0.032709	0.0163408	-4.95e-05	-0.0272744	0.0298038
108463	c1c(cccc1O)O	Resorcinol	3.25	0	0.2772	0.0768398	34.1668	0	0	6	0	2	0	0	0	0	0	0	0	1383.62	0	95.0425	56.5309	38.826	10.1967	1.01606	0	0	106.068	72.3088	31.0837	0	8.01838	7.97961	7.81661	8.03059	6.71846	0	160.084	146.451	157.672	169.096	0.387635	-0.219782	0.0633518	-0.118462	0.191608	-0.18614	0.075606
111262	C(CCC)CCN	Hexylamine	3.25	0	-1.839	3.38192	26.4794	0	0	0	1	0	0	0	0	0	0	0	0	1077.02	6.09638	51.1995	17.3671	16.4039	14.9154	12.3104	5.11547	1.01606	89.2111	83.0324	72.2196	53.4139	7.10099	7.01696	7.02334	7.03319	7.05043	7.08376	170.262	151.595	169.736	170.894	0.162334	-0.0798112	-0.01443	0.0093524	0.000653	0.000915	0.0058012
14548460	c1(C(c2ccncc2)=O)ccccc1	4-Benzoylpyridine	3.25	0	0.467	0.218089	61.2479	0	0	12	1	1	0	0	0	0	0	0	0	2192.48	251.001	98.6989	67.1479	61.2609	63.9043	47.6024	31.0252	19.3078	190.455	200.267	178	126.481	7.58721	7.52509	7.70649	7.7463	7.33764	7.24383	155.76	140.846	152.013	155.403	0.252668	-0.0703008	-0.0841972	0.048168	-0.0375526	0.0209477	-0.00990628
121335	c1(cc(ccc1O)C=O)OC	Vanillin	3.26	0	-0.0463	0.00214369	44.2786	0	0	6	0	3	0	0	0	0	0	0	0	1930.15	0	98.9148	82.3024	54.9473	41.2061	32.1844	6.51095	0	159.541	125.926	101.126	49.6037	8.11195	8.08637	8.03795	7.98332	7.62368	7.71945	160.529	145.157	151.412	160.237	0.466713	-0.184598	-0.119305	0.204661	-0.191238	-0.038015	0.156113
106945	C(CBr)C	1-Bromopropane	3.26	0	0.6637	0.440498	22.1216	0	0	0	0	0	0	0	0	0	1	0	1	6824.55	0	133.3	66.195	27.5251	0	0	0	0	70.0114	0	0	0	7.27389	7.12775	7.26019	0	0	0	164.943	145.847	170.506	176.828	0.034589	-0.00705322	-0.0131465	0.00650504	-0.00359981	0	0
75365	C(C)(=O)Cl	Acetyl chloride	3.27	0	0.372	0.138384	16.5022	0	0	0	0	1	0	0	0	1	0	0	1	1804.25	0	133.09	25.9303	0	0	0	0	0	0	0	0	0	8.66625	9.23918	0	0	0	0	165.993	147.587	180.762	0	0.14811	-0.0847345	0.0461896	-0.0355101	0	0	0
121697	c1(ccccc1)N(C)C	N,N-Dimethylaniline	3.28	0	1.1744	1.37922	44.5749	0	0	6	1	0	0	0	0	0	0	0	0	1361.49	0	75.1738	44.459	25.39	15.4723	5.45247	1.01606	0	122.014	97.1199	64.5449	31.0837	7.22144	7.30661	7.12929	7.00911	6.87813	6.71846	162.984	146.804	154.555	163.064	0.123309	-0.00771168	-0.050117	-0.00265051	-0.0205872	-0.00907011	0.0137365
121324	CCOc1cc(ccc1O)C=O	Ethyl vanillin	3.28	0	0.2041	0.0416568	48.5724	0	0	6	0	3	0	0	0	0	0	0	0	2076.44	54.4774	93.0845	68.7881	58.6174	49.3487	32.9962	15.1556	6.05304	172.599	151.067	121.095	78.6341	7.95929	7.99783	7.98619	7.88372	7.6715	7.3605	161.213	145.046	158.145	158.237	0.467032	-0.193347	-0.0919033	0.177893	-0.191898	-0.00223655	0.0982943
108394	c1c(cccc1O)C	Metacresol	3.29	0	1.2867	1.6556	36.8433	0	0	6	0	1	0	0	0	0	0	0	0	1273.95	0	81.4306	46.8228	25.4746	9.48205	1.01606	0	0	105.16	78.1262	31.0837	0	7.49269	7.52645	7.26828	7.61219	6.71846	0	159.522	143.622	153.002	165.834	0.213742	-0.11197	0.0291768	-0.0411936	0.0364638	-0.0565247	0.0371769
927742	C(C#C)CO	3-Butyn-1-ol	3.29	0	0.5718	0.326955	19.4928	0	0	0	0	1	0	0	0	0	0	0	0	839.121	0	70.1619	27.9638	27.1841	7.56655	1.01606	0	0	98.4457	64.7294	31.0837	0	7.62041	7.47083	7.26425	7.50643	6.71846	0	163.83	148.452	167.422	167.278	0.254184	-0.0993025	-0.0639721	0.0233301	0.046685	-0.059701	0.0258685
763699	C(C(OCC)=O)COCC	Ethyl 3-ethoxypropionate	3.29	0	0.5066	0.256644	37.1532	0	0	0	0	3	0	0	0	0	0	0	0	1791.98	269.399	74.2337	37.5534	47.7484	29.5089	27.3715	23.2474	17.96	147.933	112.427	95.2653	106.219	7.78739	7.91791	8.01462	7.40886	7.61487	8.05252	168.032	148.592	171.055	161.581	0.425346	-0.178784	0.0125263	-0.186058	0.198698	-0.00913293	-0.0217299
34274049	c1(c(cc(cc1OC)CNCCCOC)OC)OC	N-(3-Methoxypropyl)-3,4,5-trimethoxybenzylamine	3.3	0	-1.0134	1.02698	77.3302	0	0	6	1	4	0	0	0	0	0	0	0	3263.14	2271.42	82.2057	62.7958	52.168	41.0762	32.4627	26.7385	31.1153	157.583	142.782	129.45	105.066	7.70715	7.76774	7.66115	7.77649	7.57319	7.32953	166.221	149.085	157.328	161.189	0.729267	-0.188729	-0.38947	0.241019	0.147226	-0.127435	-0.100989
2447792	c1(c(cc(cc1)Cl)Cl)C(=O)N	2,4-Dichlorobenzamide	3.3	0	1.3104	1.71715	46.6096	0	0	6	1	1	0	0	0	2	0	0	2	3980.5	0	142.899	131.742	177.032	59.1389	136.499	35.7336	0	219.266	138.316	129.277	125.161	8.38003	8.26775	8.61035	8.20556	8.11324	9.0072	159.072	146.953	153.81	161.858	0.299084	-0.20735	0.137005	-0.117748	0.123341	-0.174514	0.122885
75912	C(OO)(C)(C)C	tert-Butyl hydroperoxide	3.33	0	0.9898	0.979704	22.0651	0	0	0	0	2	0	0	0	0	0	0	0	1099.15	0	67.0677	30.699	5.35636	1.01606	0	0	0	49.2716	31.0837	0	0	7.75313	8.08313	7.38441	6.71846	0	0	170.454	152.164	162.452	182.533	0.200513	-0.0447702	-0.0283005	-0.0209393	-0.0658146	0.0595683	0
95169	c12c(scn1)cccc2	Benzothiazole	3.33	0	1.0662	1.13678	44.9557	0	0	9	1	0	1	0	0	0	0	0	0	2238.97	0	135.516	83.2707	57.4222	10.8791	1.01606	0	0	172.065	86.1514	31.0837	0	7.52296	7.44829	7.45758	7.17437	6.71846	0	152.194	139.134	150.796	155.876	0.113886	-0.0430802	-0.0263356	0.0263918	-0.0180184	-0.00724825	0.0113475
22726007	NC(=O)c1cc(Br)ccc1	3-Bromobenzamide	3.33	0	1.0257	1.05206	44.7114	0	0	6	1	1	0	0	0	0	1	0	1	7852.76	0	150.415	127.663	126.565	172.612	27.1974	1.01606	0	182.263	145.502	94.5442	31.0837	7.93811	7.84375	7.95359	8.0072	7.76369	6.71846	158.333	146.585	152.862	161.917	0.27082	-0.20202	0.11746	-0.00535784	-0.0930269	0.0861972	-0.0548712
99558	c1(cc(c(C)cc1)N)[N+](=O)[O-]	5-Nitro-o-toluidine	3.35	0	0.8664	0.750649	42.0053	0	0	6	2	2	0	0	0	0	0	0	0	1922.31	0	99.758	73.7246	44.8153	38.3717	44.8387	16.127	0	135.492	95.0083	114.235	82.0136	8.08621	7.83561	7.90021	7.74414	8.74781	9.47117	166.331	153.934	155.616	168.006	0.195548	-0.0985778	0.0222801	-0.0273844	-0.0561567	0.115813	-0.0325251
529204	Cc1ccccc1C=O	2-Methylbenzaldehyde	3.36	0	1.4618	2.13686	40.3116	0	0	6	0	1	0	0	0	0	0	0	0	1418.21	0	84.8902	56.7554	35.2933	14.9014	4.03825	0	0	134.952	73.9259	41.2697	0	7.4955	7.37628	7.41616	7.52988	7.269	0	157.597	140.746	149.419	158.461	0.157967	-0.030466	-0.0633884	-2.54e-05	0.0327396	-0.0113792	-0.00646407
385002	c1cc(c(c(c1)F)C(=O)O)F	2,6-Difluorobenzoic acid	3.36	1	0.7876	0.620314	37.2106	0	0	6	0	2	0	0	2	0	0	0	2	2247.73	0	126.867	111.123	139.551	43.2122	9.27864	1.01606	0	187.485	121.112	68.1863	31.0837	9.22406	8.78554	10.063	9.29056	7.89938	6.71846	173.683	148.745	167.599	187.081	0.46513	-0.247292	0.132434	-0.368626	0.41099	-0.153581	-0.02025
121448	N(CC)(CC)CC	Triethylamine	3.37	0	1.0713	1.14768	32.8695	0	0	0	1	0	0	0	0	0	0	0	0	1077.02	0	53.2911	25.694	17.96	4.71307	1.01606	0	0	113.015	58.968	31.0837	0	7.10099	7.24659	7.03938	6.85152	6.71846	0	170.262	150.866	171.234	159.846	0.116667	-0.00789847	-0.0333828	-0.0485845	0.00131285	0.0143131	0.0159065
945517	c1(S(c2ccccc2)=O)ccccc1	Diphenyl sulfoxide	3.37	0	1.392	1.93766	69.7322	0	0	12	0	1	1	0	0	0	0	0	0	3025.14	249.249	125.413	82.6225	69.6435	61.9253	44.0112	27.8178	14.6617	189.372	204.184	179.43	134.947	7.49027	7.49558	7.69629	7.67565	7.32055	7.064	152.645	137.086	149.065	154.281	0.143021	-0.0298821	-0.069388	0.0322226	0.027076	-8.29e-05	-0.0368203
14321278	N(Cc1ccccc1)CC	N-Ethylbenzylamine	3.37	0	1.1517	1.32641	47.7384	0	0	6	1	0	0	0	0	0	0	0	0	1507.78	56.5569	71.7388	34.7763	27.8873	27.3502	23.5795	12.5486	4.71307	122.582	120.871	123.231	88.154	7.19158	7.20433	7.14862	7.11988	7.08936	6.94511	163.318	146.817	161.778	164.325	0.163727	-0.0454922	-0.0479159	0.0108566	-0.00131585	-0.00352477	-0.0145809
552410	c1(c(cc(OC)cc1)O)C(C)=O	Paeonol	3.38	0	-0.1078	0.0116208	48.7551	0	0	6	0	3	0	0	0	0	0	0	0	2076.44	121.024	93.0845	76.9187	63.0738	29.5374	28.4129	38.5617	13.4471	175.279	114.726	92.1509	128.159	7.95929	8.1161	8.00328	7.70378	7.55781	7.9542	161.213	145.046	152.827	155.47	0.455997	-0.188501	-0.00872837	-0.142398	0.27575	-0.284906	0.133361
2117115	O[C@@H](C)CC#C	4-Pentyn-2-ol	3.38	0	0.3679	0.13535	24.4908	0	0	0	0	1	0	0	0	0	0	0	0	985.417	0	66.9305	28.0241	20.1085	11.0969	1.01606	0	0	86.6074	98.1115	31.0837	0	7.48586	7.64302	7.02953	7.39683	6.71846	0	164.197	147.505	165.068	171.562	0.253686	-0.109225	-0.0289313	-0.017463	0.0732585	-0.0798653	0.0353829
131113	COC(=O)c1ccccc1C(=O)OC	Dimethyl phthalate	3.39	0	1.0346	1.0704	52.4924	0	0	6	0	4	0	0	0	0	0	0	0	2476.67	78.7389	101.174	91.3088	79.6444	76.4579	36.688	13.5405	6.56158	196.874	183.091	134.124	81.7751	8.16653	7.94312	8.48739	8.59373	7.63158	7.84113	160.789	144.402	148.874	158.325	0.562458	-0.323123	0.0242107	0.129052	-0.300825	0.324294	-0.0391488
464459	CC1(C)[C@H]2CC[C@]1(C)[C@H](O)C2	(-)-Borneol	3.39	0	0.9432	0.889626	44.2816	0	0	0	0	1	0	0	0	0	0	0	0	1716.9	0	66.7006	40.8696	13.587	2.58913	1.01606	0	0	93.2222	37.8021	31.0837	0	7.23066	7.32124	7.19241	6.95539	6.71846	0	164.894	144.545	153.343	164.096	0.232484	-0.115384	-2.41e-05	0.0376124	-0.0595578	-0.0199228	0.0410343
619249	c1(cc(ccc1)C#N)[N+](=O)[O-]	3-Nitrobenzonitrile	3.39	0	1.4558	2.11935	39.152	0	0	6	2	2	0	0	0	0	0	0	0	1918.24	0	122.863	85.7137	73.18	100.559	98.9138	0	0	173.932	188.252	141.982	0	8.45094	7.92933	8.38432	9.037	10.1126	0	161.374	148.215	155.493	168.701	0.167351	-0.0505299	-0.0317258	0.0652217	-0.0508049	-0.0482146	0.032378
95545	c1ccc(c(c1)N)N	o-Phenylenediamine	3.39	0	-0.99	0.9801	38.0554	0	0	6	2	0	0	0	0	0	0	0	0	1266.11	0	81.6853	52.6531	21.4575	4.73028	1.01606	0	0	103.61	54.5772	31.0837	0	7.46213	7.53453	7.48195	6.96675	6.71846	0	166.412	155.696	160.216	173.408	0.271109	-0.173502	0.0354962	0.113008	-0.201699	0.0604938	0.030648
110565	C(CCCl)CCl	1,4-Dichlorobutane	3.39	0	0.9358	0.875722	26.4788	0	0	0	0	0	0	0	0	2	0	0	2	3098.59	0	106.248	46.2158	58.3928	155.967	0	0	0	118.458	125.439	0	0	7.71864	7.41543	7.62954	8.33092	0	0	165.917	145.954	169.192	171.624	0.080336	-0.0130101	-0.0246745	0.00764329	-0.0154935	0.0053668	0
103059	C(CCc1ccccc1)(C)(C)O	2-Methyl-4-phenyl-2-butanol	3.39	0	1.6596	2.75427	55.3855	0	0	6	0	1	0	0	0	0	0	0	0	1859.13	139.316	70.6001	34.0019	21.4781	32.088	37.4332	18.9809	5.80482	103.921	125.124	150.329	99.7782	7.27831	7.46278	7.06182	7.10219	7.38761	7.16969	162.103	143.932	156.877	167.209	0.251284	-0.116138	0.0514068	-0.11822	0.0259493	0.0690091	-0.0334376
700583	C1C2CC3CC1CC(C3=O)C2	Adamantanone	3.39	0	-0.8534	0.728292	42.5218	0	0	0	0	1	0	0	0	0	0	0	0	1712.83	0	77.5123	35.3552	16.5322	11.0852	4.03825	0	0	88.9744	67.7514	41.2697	0	7.31261	7.26722	7.24728	7.10672	7.269	0	161.69	141.429	157.4	169.823	0.133405	-0.0416475	-0.0288689	0.0233657	-0.023364	0.0139413	-0.0101291
1071836	C(C(=O)O)NCP(=O)(O)O	Glyphosate	3.4	3	-1.3683	1.87224	30.7811	0	1	0	1	5	0	1	0	0	0	0	0	2876.33	2.03213	166.745	57.4522	53.5749	84.2014	106.489	16.127	1.01606	121.764	137.357	123.368	82.0136	8.86971	8.72007	7.94635	8.7953	9.41168	9.47117	172.677	157.235	174.844	173.42	0.908187	-0.684244	0.278517	0.202658	-0.22587	-0.458475	0.797154
5395755	S(CC)CCSCC	3,6-Dithiaoctane	3.4	0	1.9098	3.64734	44.9924	0	0	0	0	0	2	0	0	0	0	0	0	2935.5	84.8353	102.028	52.3379	42.8243	32.0289	22.627	17.96	4.71307	138.881	101.158	104.007	113.015	7.12679	7.17918	7.1062	7.0266	7.09002	7.03938	162.012	142.416	159.153	157.415	0.0732566	-0.00578604	-0.0319845	-0.00667362	0.00494206	0.00833378	-0.0122892
77736	C1C=CC2C1C3CC2C=C3	Dicyclopentadiene	3.41	0	0.1078	0.0116208	42.3493	0	0	0	0	0	0	0	0	0	0	0	0	1454.83	0	78.1856	28.6884	19.08	5.76936	1.01606	0	0	104.784	66.935	31.0837	0	7.09212	7.08636	6.97464	6.88954	6.71846	0	158.498	139.958	156.68	165.181	0.0538833	-0.00172771	-0.0218588	-0.01704	0.0151218	-0.0179196	0.0164827
96184	C(CCl)(CCl)Cl	1,2,3-Trichloropropane	3.41	0	2.2057	4.86511	29.6691	0	0	0	0	0	0	0	0	3	0	0	3	4207.98	0	162.643	201.771	155.967	0	0	0	0	125.439	0	0	0	8.4037	8.47909	8.33092	0	0	0	164.495	145.726	168.809	179.243	0.120517	-0.00617644	-0.063441	0.00488254	0.00447654	0	0
287923	C1CCCC1	Cyclopentane	3.41	0	-1.44	2.0736	14.558	0	0	0	0	0	0	0	0	0	0	0	0	731.481	0	56.1594	6.56158	1.01606	0	0	0	0	31.0837	0	0	0	6.99248	6.91805	6.71846	0	0	0	165.543	144.346	169.02	184.918	0.0209068	2.17e-18	-0.0104534	-0.0139378	0.0139378	0	0
924414	C(=C)[C@@H](O)CC=C	1,5-Hexadien-3-ol	3.41	0	1.1599	1.34537	30.7087	0	0	0	0	1	0	0	0	0	0	0	0	1131.71	0	64.911	32.6613	23.2567	13.5714	5.45247	1.01606	0	104.514	85.0769	64.5449	31.0837	7.39879	7.43545	7.32565	7.17455	6.87813	6.71846	164.435	146.913	163.61	167.788	0.2578	-0.126378	-0.0182066	0.0341974	-0.0143275	-0.0287632	0.0131906
80524	C(C1CCC(C)(N)CC1)(C)(C)N	p-Menthane-1,8-diyldiamine	3.42	0	-0.0348	0.00121104	50.8577	0	0	0	2	0	0	0	0	0	0	0	0	1857.39	40.6426	60.3977	32.0397	16.0651	12.6404	21.1504	12.9508	1.01606	89.8818	76.5453	83.8402	103.091	7.16514	7.34724	7.04387	6.98194	7.01263	7.60459	169.371	151.236	160.772	170.604	0.294923	-0.180898	0.119793	-0.124939	-0.00377192	-0.0226712	0.219042
529191	Cc1ccccc1C#N	o-Tolunitrile	3.42	0	1.6889	2.85238	40.2163	0	0	6	1	0	0	0	0	0	0	0	0	1357.42	0	87.9438	58.1845	36.3665	17.0267	4.29181	0	0	142.963	85.9506	45.0544	0	7.34719	7.307	7.29515	7.3768	7.10856	0	157.501	140.617	149.875	159.638	0.126286	-0.0382488	-0.0462814	0.00947311	0.0436822	-0.0210693	-0.0106988
57432	C1(C(NC(=O)NC1=O)=O)(CCC(C)C)CC	Amobarbital	3.42	0	-0.0467	0.00218089	56.3816	0	0	0	2	3	0	0	0	0	0	0	0	2765.49	503.579	81.4639	56.1911	46.179	33.6184	38.9104	17.3844	12.9123	133.79	123.128	130.317	91.9172	7.7746	7.66151	7.79731	7.63034	7.5987	7.88916	167.709	150.031	159.847	168.045	0.553035	-0.399561	0.407812	-0.55908	0.364629	-0.147557	0.190616
124174	C(OCCOCCCC)COC(C)=O	Butyl carbitol acetate	3.42	0	-0.8561	0.732907	50.2372	0	0	0	0	4	0	0	0	0	0	0	0	2486.83	1363.69	74.3295	35.5372	35.8639	30.9746	34.1331	33.8294	29.6455	126.844	105.298	119.162	123.098	7.74063	7.85492	7.4746	7.64537	7.68119	7.49006	167.885	148.382	169.2	163.065	0.59452	-0.219814	-0.136358	0.130657	-0.0862373	-0.0242673	0.0730131
102692	N(CCC)(CCC)CCC	Tripropylamine	3.42	0	-0.6621	0.438376	43.4655	0	0	0	1	0	0	0	0	0	0	0	0	1515.91	27.4337	54.1516	25.172	24.257	19.4232	10.4293	4.71307	1.01606	115.007	112.584	76.6009	58.968	7.06948	7.1522	7.14932	7.01982	6.89675	6.85152	168.892	148.91	168.325	168.644	0.130032	-0.0107718	-0.056681	0.0164742	-0.0395318	-0.00301741	0.0178863
108883	Cc1ccccc1	Toluene	3.43	0	1.8498	3.42176	35.2378	0	0	6	0	0	0	0	0	0	0	0	0	1017.98	0	73.7804	34.9375	12.9924	4.71307	1.01606	0	0	92.7471	58.968	31.0837	0	7.10209	7.13681	6.96893	6.85152	6.71846	0	157.793	140.836	152.957	165.273	0.0438722	0.000757	-0.01288	-0.0202488	-0.00506011	0.0103538	0.00514199
107153	C(CN)N	Ethylenediamine	3.44	0	-1.4766	2.18035	17.8686	0	0	0	2	0	0	0	0	0	0	0	0	689.049	0	53.2404	14.9187	5.38373	1.01606	0	0	0	49.7112	31.0837	0	0	7.436	7.25758	7.23859	6.71846	0	0	179.618	168.833	182.538	189.159	0.279738	-0.158126	-0.0254192	0.102186	-0.11445	0.05594	0
102272	c1(cc(ccc1)C)NCC	N-Ethyl-3-methylaniline	3.44	0	1.3353	1.78303	47.856	0	0	6	1	0	0	0	0	0	0	0	0	1507.78	12.1928	71.7388	39.6868	30.7386	24.242	15.168	6.2975	1.01606	131.953	125.047	94.8231	70.9184	7.19158	7.30249	7.14021	7.19385	6.95695	6.90854	163.318	146.817	160.753	161.738	0.141008	-0.0488329	0.0076059	-0.0463363	0.0299185	-0.0493511	0.0236962
587020	c1(cc(ccc1)N)CC	3-Ethylaniline	3.44	0	0.318	0.101124	43.636	0	0	6	1	0	0	0	0	0	0	0	0	1361.49	0	72.9776	40.9235	27.6003	17.8512	6.30882	1.01606	0	125.024	98.4553	64.562	31.0837	7.22144	7.25252	7.15303	7.15659	7.07227	6.71846	162.984	147.57	157.627	161.974	0.159445	-0.084844	0.0340327	-0.0376343	0.00940474	-0.0183883	-0.00411837
99990	c1([N+](=O)[O-])ccc(C)cc1	4-Nitrotoluene	3.44	0	2.0631	4.25638	38.4555	0	0	6	1	2	0	0	0	0	0	0	0	1725.09	0	100.649	66.1431	41.4787	36.7513	85.337	16.127	0	127.592	102.634	173.272	82.0136	8.04223	7.71795	7.81401	7.8791	8.98086	9.47117	162.596	148.172	154.508	167.396	0.0821941	-0.0181088	-0.0251231	0.00793792	-0.007745	0.00835698	0.0147672
99978	c1(N(C)C)ccc(C)cc1	Dimethyl-4-toluidine	3.44	0	1.6208	2.62699	48.8569	0	0	6	1	0	0	0	0	0	0	0	0	1507.78	18.2892	72.6937	46.6075	24.039	16.8362	18.0748	12.1071	1.01606	119.879	94.517	94.3199	114.737	7.19158	7.31847	7.1045	6.98705	7.09761	7.11763	163.318	146.484	151.652	162.716	0.12144	-0.00675385	-0.039624	-0.0159281	-0.0350278	0.0328072	-0.00518974
71556	C(C)(Cl)(Cl)Cl	Methylchloroform	3.45	0	2.0293	4.11806	26.2173	0	0	0	0	0	0	0	0	3	0	0	3	4061.68	0	208.279	35.7336	0	0	0	0	0	0	0	0	0	8.93291	9.0072	0	0	0	0	164.102	146.317	176.34	0	0.113575	-0.0929907	0.0662649	-0.0300616	0	0	0
19549985	C(#C)[C@@](CCC(C)C)(O)C	3,6-Dimethyl-1-heptyn-3-ol	3.46	0	1.5433	2.38177	41.5357	0	0	0	0	1	0	0	0	0	0	0	0	1570.6	6.09638	61.7604	31.3238	18.9043	27.1388	18.2706	3.7048	1.01606	97.4442	108.863	112.495	51.3632	7.25815	7.37616	7.09648	7.11604	7.46685	6.81523	164.819	145.989	158.991	168.063	0.258963	-0.152388	0.0582608	-0.0170606	-0.0761787	0.110034	-0.0820793
108952	c1(ccccc1)O	Phenol	3.46	0	0.8403	0.706104	32.5613	0	0	6	0	1	0	0	0	0	0	0	0	1127.65	0	87.2624	43.4228	19.704	5.38306	1.01606	0	0	91.026	53.5142	31.0837	0	7.60812	7.56161	7.4444	7.24378	6.71846	0	158.133	143.454	158.025	169.067	0.215371	-0.113201	0.0212625	-0.0171454	-0.0113728	-0.000736	0.0135073
98033	c1cc(sc1)C=O	2-Thiophenecarboxaldehyde	3.46	0	0.366	0.133956	33.294	0	0	5	0	1	1	0	0	0	0	0	0	2009.2	0	144.345	77.683	50.1017	8.57153	0	0	0	134.287	56.5487	0	0	7.87927	7.67041	7.93849	8.09482	0	0	151.493	136.939	150.615	163.8	0.154571	-0.0302127	-0.072501	0.022258	0.0279313	-0.0247608	0
88744	c1(c(cccc1)N)[N+](=O)[O-]	2-Nitroaniline	3.46	0	0.42	0.1764	37.7233	0	0	6	2	2	0	0	0	0	0	0	0	1776.01	0	107.933	77.4886	63.2578	30.0461	8.57153	0	0	144.282	95.8101	56.5487	0	8.29129	7.93677	8.33747	8.43276	8.09482	0	166.478	155.732	160.246	173.479	0.20494	-0.0979538	-0.0459254	0.02356	0.0920099	-0.0738562	-0.000304
621089	c1(CS(Cc2ccccc2)=O)ccccc1	Benzyl sulfoxide	3.46	0	1.9176	3.67719	78.061	0	0	12	0	1	1	0	0	0	0	0	0	3317.73	1380.17	112.009	63.0951	58.2026	59.9386	47.0004	44.7619	40.5932	159.017	171.455	166.302	176.661	7.39071	7.43789	7.31515	7.57656	7.46066	7.26875	155.225	138.491	151.929	157.086	0.158497	0.000928	-0.0650975	-0.0702575	0.0548779	0.0232432	0.00262051
107131	C(C#N)=C	Acrylonitrile	3.47	0	0.6355	0.40386	16.2707	0	0	0	1	0	0	0	0	0	0	0	0	632.037	0	82.1813	34.7672	14.1191	0	0	0	0	86.9662	0	0	0	7.56837	7.45363	8.27885	0	0	0	163.768	146.102	172.897	197.641	0.106411	-0.0441996	-0.00820727	0.0272352	-0.0280339	0	0
108441	Cc1cccc(c1)N	m-Toluidine	3.47	0	0.6531	0.42654	38.7876	0	0	6	1	0	0	0	0	0	0	0	0	1215.19	0	75.9456	42.91	21.5523	8.85718	1.01606	0	0	102.426	80.6811	31.0837	0	7.26185	7.34165	7.10829	7.24262	6.71846	0	162.533	148.139	154.479	167.266	0.155403	-0.0830104	0.0364682	-0.047046	0.0246305	-0.0502689	0.041525
79016	C(=C\Cl)(/Cl)Cl	Trichloroethylene	3.47	0	1.7428	3.03735	25.2622	0	0	0	0	0	0	0	0	3	0	0	3	4059.65	0	286.748	646.218	0	0	0	0	0	0	0	0	0	9.67106	10.5414	0	0	0	0	157.164	143.595	172.25	0	0.090315	-0.0296203	-0.026231	0.0106939	0	0	0
13171216	P(O\C(=C(\C(N(CC)CC)=O)Cl)C)(OC)(OC)=O	Phosphamidon	3.48	0	1.0057	1.01143	69.9196	0	0	0	1	5	0	1	0	1	0	0	1	5154.06	2310.66	128.686	106.811	84.7051	75.5785	60.334	43.4513	39.8389	179.827	157.415	142.386	116.512	8.06533	8.12245	8.41362	8.19007	7.85967	7.60845	167.514	149.025	161.06	161.772	0.770562	-0.618876	0.340371	0.0330182	-0.0663536	-0.412848	0.486983
603838	c1(c(c(ccc1)N)C)[N+](=O)[O-]	2-Amino-6-nitrotoluene	3.48	0	0.8664	0.750649	42.0053	0	0	6	2	2	0	0	0	0	0	0	0	1922.31	0	99.758	77.8111	54.5999	30.6912	9.25839	0	0	150.719	88.665	58.8637	0	8.08621	7.83826	8.04538	8.0294	8.21994	0	166.331	153.934	155.554	167.369	0.196817	-0.0994063	0.00423648	-0.0129501	-0.0134943	0.0810311	-0.0578253
506967	C(C)(=O)Br	Acetyl bromide	3.48	0	0.481	0.231361	19.1011	0	0	0	0	1	0	0	0	0	1	0	1	6932.19	0	222.079	48.3351	0	0	0	0	0	0	0	0	0	8.42144	8.90741	0	0	0	0	161.908	145.422	172.917	0	0.136804	-0.0736046	0.0379251	-0.0327223	0	0	0
96139	C([C@@H](CBr)Br)O	2,3-Dibromopropanol	3.49	0	1.2901	1.66436	32.5851	0	0	0	0	1	0	0	0	0	2	0	2	13464.2	0	225.164	442.876	130.788	27.5251	0	0	0	105.66	70.0114	0	0	8.084	8.00409	8.03712	7.26019	0	0	162.873	147.617	164.303	174.242	0.265137	-0.0999795	-0.0801993	0.0506644	0.00673959	-0.00979363	0
68111	C(=O)(CS)O	Mercaptoacetic acid	3.49	1	0.0694	0.00481636	20.4729	0	0	0	0	2	1	0	0	0	0	0	0	1832.37	0	123.29	102.976	13.3205	1.01606	0	0	0	72.4787	31.0837	0	0	8.60024	8.78525	8.00876	6.71846	0	0	163.499	147.806	171.288	176.217	0.349998	-0.235412	0.0760445	0.0387605	-0.0770163	0.0226248	0
111159	C(OC(C)=O)COCC	Ethylene glycol monoethyl ether acetate	3.5	0	0.1406	0.0197684	32.7501	0	0	0	0	3	0	0	0	0	0	0	0	1645.68	127.12	76.9449	37.6469	40.5575	29.0116	26.6896	38.7949	8.47466	143.68	94.6508	97.5793	150.681	7.90094	8.18752	7.58818	7.57401	7.6869	7.78815	168.387	149.229	172.037	158.282	0.420253	-0.187243	-0.0085473	0.0159414	-0.095174	0.0954987	-0.0335124
631641	C(C(Br)Br)(O)=O	Dibromoacetic acid	3.5	1	1.3882	1.9271	28.2527	0	0	0	0	2	0	0	0	0	2	0	2	13571.8	0	353.754	646.753	54.0342	0	0	0	0	108.939	0	0	0	9.49316	10.3225	7.80192	0	0	0	159.182	148.263	169.025	168.739	0.388322	-0.214406	-0.0191281	0.0695989	-0.0302256	0	0
100107	CN(C)c1ccc(cc1)C=O	p-Dimethylaminobenzaldehyde	3.51	0	0.7864	0.618425	49.6487	0	0	6	1	1	0	0	0	0	0	0	0	1761.72	102.858	83.632	57.0737	33.4318	23.1606	27.7991	48.1185	8.57153	133.465	104.684	101.131	152.335	7.5146	7.47053	7.35111	7.21341	7.1981	7.70088	162.361	146.192	151.591	162.221	0.23671	-0.0383327	-0.0901035	0.0252435	-0.0358371	-0.0570864	0.0835903
459596	c1(NC)ccc(cc1)F	4-Fluoro-N-methylaniline	3.51	0	0.5483	0.300633	39.408	0	0	6	1	0	0	0	1	0	0	0	1	1575.11	0	89.9482	56.2319	35.5792	25.2142	26.3416	19.1504	0	134.416	94.0255	79.8839	74.1835	7.80782	7.76217	7.64039	7.21714	7.54688	10.368	169.512	150.222	165.741	167.921	0.18518	-0.0787808	0.00563169	-0.00389798	-0.104149	0.107033	0.00593458
700389	c1(ccc(C)cc1O)[N+](=O)[O-]	6-Nitro-m-cresol	3.51	0	1.5	2.25	40.061	0	0	6	1	3	0	0	0	0	0	0	0	1981.06	0	105.956	80.6016	61.7104	33.8892	47.861	16.127	0	142.393	107.639	110.077	82.0136	8.3372	8.04451	8.21187	8.37959	7.97535	9.47117	163.865	150.241	154.454	167.964	0.269326	-0.114528	-0.0542842	-0.0141028	0.136805	-0.114144	0.046759
108054	CC(=O)OC=C	Vinyl acetate	3.52	0	0.1053	0.0110881	21.105	0	0	0	0	2	0	0	0	0	0	0	0	1095.09	0	85.2421	44.5605	47.2442	9.58376	1.01606	0	0	166.298	83.0962	31.0837	0	8.09802	8.6742	7.75015	7.46859	6.71846	0	165.632	148.396	172.24	153.784	0.247265	-0.157062	0.101858	-0.0839645	0.0301391	-0.0257414	0.0111375
4798441	C([C@@H](C=C)O)CC	1-Hexen-3-ol	3.52	0	-0.3279	0.107518	27.8316	0	0	0	0	1	0	0	0	0	0	0	0	1133.75	0	59.0439	26.8868	20.5095	12.1084	4.71307	1.01606	0	98.1614	81.0106	58.968	31.0837	7.32718	7.31201	7.32302	7.20587	6.85152	6.71846	166.591	147.603	166.282	168.915	0.240264	-0.123666	0.000709	0.0217829	-0.0309492	-0.00576412	0.0103835
4920778	c1(c(cccc1O)C)[N+](=O)[O-]	3-Methyl-2-nitrophenol	3.52	0	1.5	2.25	40.061	0	0	6	1	3	0	0	0	0	0	0	0	1981.06	0	105.956	84.9358	72.5821	25.2823	4.37405	0	0	159.311	97.1517	42.4015	0	8.3372	8.04732	8.37316	8.60224	7.33018	0	163.865	150.241	154.388	167.255	0.270602	-0.115362	-0.0722853	0.000236	0.179515	-0.148952	0.0215473
111706	C(CCCO)CCC	1-Heptanol	3.53	0	-1.8374	3.37604	27.7335	0	0	0	0	1	0	0	0	0	0	0	0	1282.07	68.6166	54.5862	19.233	18.7401	18.0197	16.867	14.7263	5.71805	94.762	90.8148	84.4993	72.7705	7.23461	7.08497	7.1033	7.13009	7.17295	7.25255	167.987	147.658	168.022	168.715	0.23422	-0.1005	-0.0361512	0.0153174	0.00121889	-0.000325	0.00110193
4655349	C(OC(C)C)(C(C)=C)=O	Isopropyl methacrylate	3.53	0	1.115	1.24323	35.9162	0	0	0	0	2	0	0	0	0	0	0	0	1533.98	0	72.1549	46.0079	31.7634	36.1396	10.0532	1.01606	0	114.643	159.901	99.2453	31.0837	7.62422	7.86293	7.82085	7.80514	7.04371	6.71846	165.594	146.574	161.373	171.705	0.278762	-0.200886	0.0811361	0.0508561	-0.0539691	-0.023731	-0.0223003
10293068	C[C@@]12CC[C@@H](C1(C)C)[C@@H](C2=O)Br	(+)-3-Bromocamphor	3.53	0	1.6662	2.77622	51.1352	0	0	0	0	1	0	0	0	0	1	0	1	8098.5	0	104.3	96.1384	52.6298	13.3085	0	0	0	115.38	51.9733	0	0	7.40355	7.47076	7.33138	7.21104	0	0	161.731	142.07	150.846	161.994	0.169142	-0.0500249	-0.0741539	0.0474216	0.0379945	-0.0458085	0
91883	c1(N(CCO)CC)cc(ccc1)C	2-(N-Ethyl-m-toluidino)ethanol	3.53	0	1.3318	1.77369	59.443	0	0	6	1	1	0	0	0	0	0	0	0	2056.34	110.059	73.5032	45.0625	39.0425	30.614	21.5334	13.6534	4.07628	152.472	128.484	105.127	77.3547	7.3571	7.43957	7.26031	7.28928	7.25662	7.07289	164.501	147.354	161.63	157.89	0.329914	-0.115349	-0.0649305	0.0433649	-0.0300328	-0.0117895	-0.032146
1129357	N#Cc1ccc(C(=O)OC)cc1	Methyl 4-cyanobenzoate	3.54	0	1.0581	1.11958	46.7026	0	0	6	1	2	0	0	0	0	0	0	0	2013.62	204.559	104.4	82.3452	61.2039	53.4997	44.4324	52.9065	51.1398	175.603	167.23	136.355	117.762	7.98942	7.75739	8.20081	8.01275	7.42394	7.71216	158.827	142.626	149.221	162.301	0.382354	-0.208604	-0.033648	0.147531	0.0084122	-0.113374	-0.147621
107051	C(CCl)=C	Allyl chloride	3.54	0	1.4634	2.14154	20.475	0	0	0	0	0	0	0	0	1	0	0	1	1694.58	0	96.8567	51.4016	12.5886	0	0	0	0	62.4429	0	0	0	7.58772	7.38939	7.48138	0	0	0	163.681	145.653	167.452	182.058	0.0633798	-0.0165363	-0.0247041	0.0159499	-0.00639937	0	0
56235	C(Cl)(Cl)(Cl)Cl	Carbon tetrachloride	3.55	0	3.5846	12.8494	26.849	0	0	0	0	0	0	0	0	4	0	0	4	5171.07	0	425.79	0	0	0	0	0	0	0	0	0	0	11.1686	0	0	0	0	0	159.886	146.019	0	0	0.175557	-0.140445	0.052667	0	0	0	0
111137	C(CC(=O)C)CCCC	2-Octanone	3.55	0	-1.3198	1.74187	32.8647	0	0	0	0	1	0	0	0	0	0	0	0	1426.34	127.12	58.1553	22.9306	20.9412	20.7439	20.439	19.9055	8.47466	101.992	99.8754	96.6051	90.8821	7.24685	7.25828	7.11243	7.13927	7.18074	7.25331	166.34	145.453	165.901	167.282	0.134296	-0.0429101	0.00505035	-0.0339962	0.00143681	-0.000669	0.00247582
103833	c1(ccccc1)CN(C)C	N,N-Dimethylbenzylamine	3.55	0	1.4372	2.06554	48.7393	0	0	6	1	0	0	0	0	0	0	0	0	1507.78	6.09638	72.6937	38.6181	24.024	31.552	15.4723	5.45247	1.01606	105.191	142.36	97.1199	64.5449	7.19158	7.2214	7.04794	7.21988	7.00911	6.87813	163.318	146.484	152.322	169.496	0.145282	-0.000989	-0.100771	0.0157806	0.0308658	-0.0307145	-0.0141995
368774	C(c1cc(C#N)ccc1)(F)(F)F	3-(Trifluoromethyl)benzonitrile	3.56	0	2.145	4.60102	41.1488	0	0	6	1	0	0	0	3	0	0	0	3	2437.19	0	128.459	98.7166	84.1871	120.161	124.272	0	0	177.008	190.337	133.167	0	9.08748	8.10612	8.84621	9.58547	11.1015	0	179.745	148.691	158.597	184.826	0.377141	-0.228891	-0.00365466	0.12801	-0.00900183	-0.155048	0.080015
504609	C(\C=C)=C\C	1,3-Pentadiene	3.56	0	1.6148	2.60758	26.1983	0	0	0	0	0	0	0	0	0	0	0	0	729.449	0	56.1594	22.478	16.7936	6.56158	1.01606	0	0	100.941	72.9102	31.0837	0	7.03464	7.00939	6.97677	6.91805	6.71846	0	162.563	144.346	162.562	164.868	0.0473955	-0.00635229	-0.0198817	-0.000466	-0.00377125	-0.00194777	0.00872155
106401	c1(ccc(Br)cc1)N	4-Bromoaniline	3.56	0	0.6594	0.434808	42.0398	0	0	6	1	0	0	0	0	0	1	0	1	7452.53	0	147.873	121.015	71.0121	127.725	80.5432	0	0	122.044	92.1864	147.867	0	7.57982	7.59741	7.40535	7.20306	8.34365	0	158.648	147.516	155.906	167.388	0.158324	-0.0964276	0.0479952	-0.0299686	-0.0589876	0.0831716	-0.0249452
104870	c1(ccc(cc1)C)C=O	4-Methylbenzaldehyde	3.56	0	1.4618	2.13686	40.3116	0	0	6	0	1	0	0	0	0	0	0	0	1418.21	0	84.8902	52.85	28.4058	23.7373	48.1185	8.57153	0	117.598	92.2254	152.335	56.5487	7.4955	7.37551	7.34868	7.34288	7.70088	8.09482	157.597	140.746	149.243	163.431	0.157399	-0.030556	-0.0566289	0.00469247	-0.000217	-0.000264	0.0200049
2150472	COC(=O)c1ccc(O)cc1O	Methyl 2,4-dihydroxybenzoate	3.57	0	0.0928	0.00861184	44.9351	0	0	6	0	4	0	0	0	0	0	0	0	2186.11	60.4881	103.778	88.4153	73.0007	48.6792	39.5587	17.9923	15.122	164.614	145.258	114.53	72.7147	8.37394	8.2459	8.5717	8.32115	7.97267	7.38635	161.775	147.169	152.305	163.426	0.653374	-0.372077	0.054954	-0.147366	0.421497	-0.496959	0.299927
589093	C(=C)CNc1ccccc1	N-Allylaniline	3.57	0	1.2553	1.57578	48.4429	0	0	6	1	0	0	0	0	0	0	0	0	1505.75	41.4016	77.4181	40.3134	31.6338	31.1377	25.9694	14.6617	5.1752	134.706	138.171	129.553	93.5341	7.23664	7.28808	7.22934	7.09294	7.0513	6.95466	161.261	146.216	161.053	164.42	0.16257	-0.0586545	-0.00968965	-0.000381	-0.0412557	0.018615	0.00048
2759286	C(N1CCNCC1)c2ccccc2	N-Benzylpiperazine	3.57	0	0.8586	0.737194	59.4947	0	0	6	2	0	0	0	0	0	0	0	0	1995.55	307.558	77.8431	36.9504	27.2318	32.3493	33.2837	21.7057	12.3023	119.663	131.368	141.555	106.073	7.2705	7.31131	7.12078	7.16321	7.16578	7.11972	164.686	148.464	162.212	165.222	0.259758	-0.0526228	-0.142855	0.0493328	0.00994296	-0.0156618	0.0127763
100027	Oc1ccc(cc1)[N+](=O)[O-]	4-Nitrophenol	3.57	0	1.0536	1.11007	35.779	0	0	6	1	3	0	0	0	0	0	0	0	1834.77	0	115.916	77.9944	55.4485	57.4254	175.352	16.127	0	138.059	116.837	173.249	82.0136	8.60615	8.16591	8.41269	8.63457	11.6608	9.47117	163.53	151.42	159.054	170.632	0.253935	-0.129028	0.0259871	0.0169618	-0.0819383	-0.00732864	0.103572
88722	c1(c(cccc1)C)[N+](=O)[O-]	2-Nitrotoluene	3.57	0	2.0631	4.25638	38.4555	0	0	6	1	2	0	0	0	0	0	0	0	1725.09	0	100.649	70.7569	53.7094	25.6357	7.06044	0	0	146.626	91.2123	51.4557	0	8.04223	7.72094	7.99547	8.27325	7.81955	0	162.596	148.172	154.437	166.598	0.0834729	-0.0189124	-0.0431823	0.022261	0.0349974	-0.0263849	-0.0105153
109659	C(CC)CBr	n-Butyl bromide	3.57	0	0.3757	0.14115	25.0332	0	0	0	0	0	0	0	0	0	1	0	1	6970.85	0	115.499	51.4173	66.195	27.5251	0	0	0	95.8923	70.0114	0	0	7.21359	7.0809	7.12775	7.26019	0	0	165.072	145.501	168.447	170.506	0.0389724	-0.00677342	-0.0157257	-0.000141	0.00674534	-0.00359111	0
2973764	COc1cc(C=O)cc(Br)c1O	5-Bromovanillin	3.59	0	0.4064	0.165161	51.8128	0	0	6	0	3	0	0	0	0	1	0	1	8313.78	0	148.79	183.459	150.154	125.811	45.4389	6.51095	0	197.395	160.667	120.59	49.6037	8.30371	8.31636	8.25441	8.24272	7.89454	7.71945	158.142	144.099	148.639	157.626	0.481387	-0.184991	-0.150134	0.229027	-0.198076	-0.00907596	0.133263
615656	c1(c(ccc(c1)C)N)Cl	2-Chloro-p-toluidine	3.6	0	1.0218	1.04408	43.5038	0	0	6	1	0	0	0	0	1	0	0	1	2470.88	0	100.28	86.2813	46.1927	21.102	13.3143	1.01606	0	128.25	91.3338	98.0744	31.0837	7.57698	7.6629	7.47151	7.45197	7.81436	6.71846	161.547	147.721	153.449	166.086	0.171968	-0.101661	-0.000549	0.047592	-0.042186	0.0250592	-0.0349952
4460860	COc1cc(c(cc1OC)OC)C=O	2,4,5-Trimethoxybenzaldehyde	3.6	0	-0.4804	0.230784	55.9601	0	0	6	0	4	0	0	0	0	0	0	0	2478.71	133.216	96.1647	95.3611	71.9959	46.4746	32.4359	18.6314	6.34363	193.341	141.144	113.718	90.4467	8.05514	8.22245	8.12863	7.88257	7.85325	7.71554	162.645	146.094	149.145	154.081	0.55763	-0.137205	-0.209867	0.032579	0.00787074	0.0736808	0.0030657
2362610	c1ccc(cc1)[C@@H]2CCCC[C@H]2O	2-Phenylcyclohexanol, trans-	3.6	0	-0.2174	0.0472628	51.6876	0	0	6	0	1	0	0	0	0	0	0	0	2003.39	45.4658	75.511	38.7543	32.6269	30.4063	22.0286	10.4705	3.78882	133.064	128.198	110.193	78.9228	7.28736	7.27748	7.27677	7.26914	7.15157	6.99234	160.885	142.79	158.403	161.591	0.25999	-0.106319	-0.0349244	0.0109753	0.0187805	-0.0233473	-0.0133981
42454068	Oc1ccc(c(C=O)c1)[N+](=O)[O-]	5-Hydroxy-2-nitrobenzaldehyde	3.6	0	0.6656	0.443023	40.8528	0	0	6	1	4	0	0	0	0	0	0	0	2235	0	122.069	94.965	83.3133	79.4994	80.0487	16.127	0	176.014	136.142	106.563	82.0136	8.82261	8.27482	8.58928	9.37377	9.62308	9.47117	162.658	150.084	154.483	166.254	0.377662	-0.138662	0.00392981	-0.0298929	-0.147728	0.12802	0.0508707
142961	O(CCCC)CCCC	Dibutyl ether	3.61	0	-1.1803	1.39311	34.4873	0	0	0	0	1	0	0	0	0	0	0	0	1428.37	281.592	56.4554	22.0116	22.0381	19.9863	20.0883	13.2875	10.4293	98.3399	99.6348	112.388	85.4173	7.20771	7.21366	7.25362	7.30405	7.01092	6.91937	167.716	147.064	168.35	169.06	0.187391	-0.0359339	-0.0744315	0.00631803	0.02837	-0.0375363	0.00445014
447609	C(c1c(C#N)cccc1)(F)(F)F	2-(Trifluoromethyl)benzonitrile	3.61	0	2.145	4.60102	41.1488	0	0	6	1	0	0	0	3	0	0	0	3	2437.19	0	128.459	102.891	107.765	101.084	17.8926	0	0	198.717	146.93	77.3792	0	9.08748	8.10694	8.92893	9.98723	9.84571	0	179.745	148.691	158.785	179.052	0.384445	-0.210691	0.0204217	0.029086	-0.102759	0.118515	-0.0467949
106478	c1(ccc(Cl)cc1)N	4-Chloroaniline	3.61	0	0.5754	0.331085	39.2218	0	0	6	1	0	0	0	0	1	0	0	1	2324.58	0	109.734	74.7148	39.8343	58.5399	35.7336	0	0	115.583	85.128	125.161	0	7.70222	7.70673	7.50685	7.29391	9.0072	0	160.691	148.444	158.2	169.606	0.167188	-0.1015	0.0503673	-0.0306603	-0.0669099	0.0974751	-0.0323665
98884	c1(ccccc1)C(=O)Cl	Benzoyl chloride	3.61	0	1.5699	2.46459	40.8135	0	0	6	0	1	0	0	0	1	0	0	1	2527.6	0	120.596	84.2631	78.6354	81.7571	25.9303	0	0	164.74	150.664	103.587	0	7.98595	7.56562	8.01735	8.56528	9.23918	0	154.697	139.467	152.394	163.005	0.195929	-0.0959956	-0.0364164	0.0319892	0.0207285	0.0035192	-0.0217894
592461	C(\C=C\C)=C\C	2,4-Hexadiene	3.61	0	1.8146	3.29277	32.1022	0	0	0	0	0	0	0	0	0	0	0	0	875.745	0	56.1594	24.4676	20.8864	15.5146	6.56158	1.01606	0	112.153	97.4373	72.9102	31.0837	7.02673	7.0208	7.00025	6.96943	6.91805	6.71846	163.121	144.346	161.755	163.208	0.0467477	-0.00160655	-0.0237491	-0.000961	-0.00132078	-0.00408067	0.00169604
123057	C(CCCC)(CC)C=O	2-Ethylhexaldehyde	3.63	0	-0.8429	0.71048	34.8995	0	0	0	0	1	0	0	0	0	0	0	0	1426.34	9.14458	58.1553	26.7704	23.5058	19.2224	16.7704	5.67769	1.01606	106.951	94.4596	89.7831	58.3632	7.24685	7.13003	7.25373	7.25871	7.18002	7.16234	166.34	145.453	164.279	166.362	0.146516	-0.0310592	-0.0553695	0.013807	0.0092564	-0.00968131	0.0103217
99081	c1(cc(ccc1)C)[N+](=O)[O-]	3-Nitrotoluene	3.63	0	2.0631	4.25638	38.4555	0	0	6	1	2	0	0	0	0	0	0	0	1725.09	0	100.649	66.1431	45.9483	50.5488	12.0058	0	0	132.292	128.116	68.1237	0	8.04223	7.71795	7.81691	8.19654	8.72043	0	162.596	148.172	154.508	167.327	0.0824433	-0.0176908	-0.0270156	-0.00539774	0.0189884	0.0214822	-0.0315881
107982	C([C@@H](C)O)OC	1-Methoxy-2-hydroxypropane	3.64	0	-0.4996	0.2496	23.8892	0	0	0	0	2	0	0	0	0	0	0	0	1099.15	0	66.0074	31.1311	17.2829	10.4753	1.01606	0	0	75.6174	87.8806	31.0837	0	7.75313	7.9065	7.33865	7.56864	6.71846	0	170.454	151.794	167.543	176.925	0.376558	-0.134009	-0.125534	0.115394	-0.0421202	-0.0473799	0.045371
2074671	OCP(=O)(O)CO	Bis(hydroxymethyl)phosphinic acid	3.64	1	-0.6008	0.360961	17.6913	0	0	0	0	4	0	1	0	0	0	0	0	2278.89	0	170.484	62.6849	21.4086	4.7938	1.01606	0	0	72.1272	43.8162	31.0837	0	8.70303	8.93824	8.38316	7.40664	6.71846	0	171.413	153.578	172.547	182.042	0.732465	-0.388431	-0.152095	0.400341	-0.256419	-0.0139282	0.0442987
71432	c1ccccc1	Benzene	3.65	0	1.4034	1.96953	30.9558	0	0	6	0	0	0	0	0	0	0	0	0	871.681	0	78.1856	27.8178	6.56158	1.01606	0	0	0	72.9102	31.0837	0	0	7.12949	7.064	6.91805	6.71846	0	0	155.856	139.958	158.446	169.02	0.0457688	5.2e-18	-0.0228844	-0.0114422	-1.13e-17	0.0114422	0
119346	c1(c(ccc(c1)N)O)[N+](=O)[O-]	4-Amino-2-nitrophenol	3.65	0	-0.1431	0.0204776	39.3288	0	0	6	2	3	0	0	0	0	0	0	0	2031.98	0	113.124	86.6972	69.6048	60.2444	15.9039	1.01606	0	144.995	119.121	82.5639	31.0837	8.58896	8.25859	8.49083	8.63734	9.33869	6.71846	167.594	157.477	159.79	171.795	0.384274	-0.193128	-0.000511	-0.0883484	0.0500513	0.219462	-0.233744
576261	c1(c(cccc1C)C)O	2,6-Dimethylphenol	3.66	0	1.7331	3.00364	41.1253	0	0	6	0	1	0	0	0	0	0	0	0	1420.24	0	77.4404	58.4827	25.3833	7.06527	1.01606	0	0	121.411	74.6078	31.0837	0	7.41371	7.51269	7.62311	7.0098	6.71846	0	160.473	143.736	149.699	163.13	0.213074	-0.115844	0.0115529	0.068889	-0.120189	0.0180504	0.0310036
33693048	c1(nc(nc(n1)OC)NCC)NC(C)(C)C	Terbumeton	3.66	0	0.2191	0.0480048	59.537	0	0	6	5	1	0	0	0	0	0	0	0	2698.89	959.579	82.2235	52.9915	45.2577	57.2766	52.5961	28.2443	15.2314	122.885	175.213	162.506	125.977	7.64045	7.75192	7.52608	8.13532	7.88987	7.97068	172.087	155.68	167.39	175.714	0.551981	-0.53279	0.620467	-0.699037	0.627	-0.333248	0.14393
502567	C(CCCC)(CCCC)=O	Dibutyl ketone	3.66	0	-1.2436	1.54654	37.8882	0	0	0	0	1	0	0	0	0	0	0	0	1572.63	281.592	57.9335	25.116	25.6298	26.3363	19.4788	13.2875	10.4293	110.9	110.719	107.715	85.4173	7.2196	7.21774	7.25414	7.30419	7.38942	6.91937	166.254	145.33	166.168	166.458	0.139918	-0.0452899	-0.0150795	-0.0144774	0.00465079	0.0351944	-0.0410596
98011	c1(ccco1)C=O	Furfural	3.66	0	-0.3787	0.143414	27.1196	0	0	5	0	2	0	0	0	0	0	0	0	1237.32	0	109.271	57.3144	50.1017	8.57153	0	0	0	134.287	56.5487	0	0	8.29817	8.20152	7.93849	8.09482	0	0	158.595	143.609	162.434	163.8	0.263689	-0.0671388	-0.119245	0.0641005	0.0187163	-0.0282778	0
104767	CCCCC(CC)CO	2-Ethyl-1-hexanol	3.66	0	-1.2606	1.58911	35.0636	0	0	0	0	1	0	0	0	0	0	0	0	1428.37	12.1928	54.7677	24.9333	21.1112	16.1357	13.9226	5.11506	1.01606	101.675	85.9671	81.1881	55.6957	7.20771	7.11076	7.20493	7.17062	7.10012	7.08687	167.716	147.276	164.71	166.966	0.238471	-0.103269	-0.0434592	0.0405938	-0.00902288	-0.0188054	0.019346
94097	c1cc(C(OCC)=O)ccc1N	Benzocaine	3.67	0	0.2727	0.0743653	49.5677	0	0	6	1	2	0	0	0	0	0	0	0	2017.69	263.108	88.5237	60.1304	51.7645	44.5737	43.1506	19.5478	18.7934	156.469	149.782	147.583	97.3379	7.76838	7.74641	7.93749	7.86785	7.46877	7.40603	163.365	148.323	159.575	162.828	0.412803	-0.26177	0.0640916	0.0374182	-0.0271511	-0.138652	0.248971
573568	c1(c(c([N+](=O)[O-])ccc1)O)[N+](=O)[O-]	2,6-Dinitrophenol	3.67	0	1.2669	1.60504	38.9967	0	0	6	2	5	0	0	0	0	0	0	0	2541.88	0	137.827	116.216	109.4	84.2076	121.044	0	0	185.006	146.259	136.078	0	9.36934	8.65551	9.49075	9.50781	10.89	0	167.657	157.511	159.819	172.27	0.330576	-0.10708	-0.110018	0.0383911	0.124589	-0.156195	0.0450259
150685	C(N(C)C)(Nc1ccc(Cl)cc1)=O	Monuron	3.68	0	0.9022	0.813965	56.3357	0	0	6	2	1	0	0	0	1	0	0	1	3214.62	936.415	102.497	75.3094	47.0888	64.1906	59.0424	48.6921	46.8208	137.023	163.535	181.382	116.757	7.8166	7.84643	7.87088	7.67134	7.74637	7.29317	164.639	150.304	157.192	172.06	0.321478	-0.255284	0.191818	-0.0478919	-0.100205	0.131122	-0.174755
60004	N(CCN(CC(O)=O)CC(O)=O)(CC(O)=O)CC(O)=O	Edetic acid	3.69	4	-1.7168	2.9474	62.3456	0	4	0	2	8	0	0	0	0	0	0	0	3899.03	3689.58	99.3673	57.6913	54.1444	53.7877	69.4937	56.3232	63.6134	145.563	140.365	143.977	140.604	8.61438	8.34755	7.62488	8.50493	8.62953	7.98214	170.353	154.882	166.721	164.646	1.43084	-0.913656	0.0535724	0.481935	-0.0126274	-1.32519	1.85606
123728	C(CC)C=O	Butyraldehyde	3.69	0	-0.3943	0.155472	19.6534	0	0	0	0	1	0	0	0	0	0	0	0	841.153	0	60.1511	19.9055	18.7317	8.57153	0	0	0	78.2915	56.5487	0	0	7.48165	7.25331	7.41296	8.09482	0	0	167.075	146.559	170.604	174.37	0.128866	-0.0273634	-0.0365601	-0.00203124	0.0152723	-0.0137505	0
2455245	C([C@@H]1CCCO1)OC(C(C)=C)=O	Tetrahydrofurfuryl methacrylate	3.69	0	0.3055	0.0933303	40.9855	0	0	0	0	3	0	0	0	0	0	0	0	2080.51	228.088	82.3142	43.3192	33.7835	48.3535	46.8339	28.5378	8.14601	115.192	150.758	147.619	131.587	7.7684	7.78027	7.88471	7.80719	7.54405	7.7911	164.86	146.077	162.664	171.098	0.442953	-0.227175	-0.0465039	0.208383	-0.240654	0.0638522	0.110114
771608	c1(c(c(c(F)c(c1F)F)F)F)N	2,3,4,5,6-Pentafluoroaniline	3.69	0	-0.2443	0.0596825	35.1446	0	0	6	1	0	0	0	5	0	0	0	5	2868.51	0	157.358	203.023	170.51	120.978	19.1504	0	0	178.455	120.872	74.1835	0	10.6344	10.721	11.1593	11.1648	10.368	0	204.258	164.331	200.109	221.272	0.513079	-0.108905	-0.237345	0.000955	0.048278	0.0901317	-0.0496537
107755	CC(CCCC(C)(C)O)CC=O	Hydroxycitronellal	3.7	0	0.3328	0.110756	47.5262	0	0	0	0	2	0	0	0	0	0	0	0	1974.9	800.949	62.2215	27.774	20.1117	22.3276	29.2302	24.3904	16.6864	93.5756	101.658	111.676	114.995	7.38993	7.43819	7.09253	7.29223	7.25736	7.55231	166.787	146.527	161.159	169.708	0.344186	-0.1442	0.0292033	-0.116585	0.0719958	-0.0165375	0.0429873
350469	c1([N+](=O)[O-])ccc(F)cc1	1-Fluoro-4-nitrobenzene	3.7	0	1.5265	2.3302	34.3013	0	0	6	1	2	0	0	1	0	0	0	1	1938.72	0	125.617	86.3893	67.3296	79.6643	303.955	0	0	148.861	133.692	195.731	0	8.93014	8.39753	8.8488	9.35171	14.616	0	170.438	152.068	167.096	178.27	0.128595	-0.0511574	0.00450707	0.054839	-0.0573608	-0.0673984	0.052273
107471	C(SC(C)(C)C)(C)(C)C	Propane, 2,2'-thiobis(2-methyl-	3.7	0	2.6578	7.0639	46.7945	0	0	0	0	0	1	0	0	0	0	0	0	2200.25	0	71.2945	31.3856	19.3972	12.1071	1.01606	0	0	93.277	114.737	31.0837	0	7.03705	7.32399	6.89851	7.11763	6.71846	0	164.822	144.242	146.817	171.394	0.0487358	-0.0273992	0.0756855	-0.112764	0.0590643	-0.0670044	0.0480497
2164172	CN(C)C(=O)Nc1cccc(c1)C(F)(F)F	Fluometuron	3.71	0	1.436	2.0621	56.834	0	0	6	2	1	0	0	3	0	0	0	3	3185	1544.73	106.036	81.3286	59.1089	79.2989	63.0923	65.7682	59.4129	145.791	173.243	171.857	132.953	8.5579	8.06295	8.32945	8.42712	8.33512	8.16728	178.542	154.69	160.115	179.701	0.561322	-0.428236	0.202198	0.00474623	-0.129139	0.270482	-0.445679
107459	C(CC(C)(C)N)(C)(C)C	tert-Octylamine	3.72	0	1.7216	2.96391	41.8715	0	0	0	1	0	0	0	0	0	0	0	0	1369.61	0	52.3017	24.1797	15.3652	12.4621	1.01606	0	0	74.1067	109.836	31.0837	0	7.07773	7.30687	6.88397	7.32255	6.71846	0	169.251	149.985	156.529	176.093	0.162073	-0.0960148	0.0803899	-0.143086	0.154377	-0.15858	0.0818778
791286	P(c1ccccc1)(c1ccccc1)(c1ccccc1)=O	Triphenylphosphine oxide	3.72	0	1.9106	3.65039	97.824	0	0	18	0	1	0	1	0	0	0	0	0	3827.34	747.748	118.648	86.141	75.6497	65.9142	44.9107	27.8178	14.6617	217.49	224.183	182.572	134.947	7.31952	7.32414	7.50753	7.49103	7.25118	7.064	152.9	137.194	147.649	150.445	0.226731	-0.0578855	-0.116696	0.0658136	0.0678233	0.00350875	-0.0867091
111682	C(CCCN)CCC	1-Heptanamine	3.72	0	-2.127	4.52413	29.391	0	0	0	1	0	0	0	0	0	0	0	0	1223.32	76.732	51.8195	18.0413	17.3671	16.4039	14.9154	12.3104	5.11547	93.2091	89.2111	83.0324	72.2196	7.08797	7.0125	7.01696	7.02334	7.03319	7.05043	169.696	150.689	168.924	169.736	0.166557	-0.0798107	-0.0165346	0.00940289	0.000755	-0.000133	0.000888
88733	c1(c(cccc1)Cl)[N+](=O)[O-]	1-Chloro-2-nitrobenzene	3.73	0	1.9854	3.94181	38.8897	0	0	6	1	2	0	0	0	1	0	0	1	2834.48	0	139.731	121.432	133.972	55.5227	16.127	0	0	188.189	130.747	82.0136	0	8.64983	8.1946	8.96329	9.10633	9.47117	0	160.767	148.485	158.212	168.845	0.110455	-0.0157387	-0.0551549	-0.00656962	0.0549471	-0.0169856	-0.015726
2232088	S(n1cncc1)(c1ccc(cc1)C)(=O)=O	1-(p-Toluenesulphonyl)imidazole	3.73	0	-0.697	0.485809	62.0916	0	0	11	2	2	1	0	0	0	0	0	0	3384.97	423.498	146.467	97.8123	68.9166	60.4528	58.0212	31.3751	32.5768	171.599	172.596	178.209	125.681	7.93761	7.88249	8.09768	7.80717	7.61263	7.87519	160.713	144.216	150.363	163.211	0.299982	-0.15829	0.0161547	-0.011133	0.0418407	-0.0484719	0.0433539
123159	C(CCC)(C=O)C	2-Methylpentaldehyde	3.73	0	0.1213	0.0147137	28.9101	0	0	0	0	1	0	0	0	0	0	0	0	1133.75	0	58.8205	25.9916	18.6133	14.8611	4.03825	0	0	90.4426	81.5018	41.2697	0	7.32718	7.19068	7.32136	7.25232	7.269	0	166.591	145.821	164.128	171.378	0.137519	-0.0313507	-0.0469922	0.020315	-0.0107445	0.0087995	-0.00878675
5922601	N#Cc1c(N)ccc(Cl)c1	2-Amino-5-chlorobenzonitrile	3.73	0	0.4145	0.17181	44.2003	0	0	6	2	0	0	0	0	1	0	0	1	2664.02	0	122.445	97.5508	79.1235	88.9352	28.5288	0	0	174.189	127.278	112.429	0	7.92366	7.84987	7.84644	7.91077	8.76442	0	160.186	147.703	154.218	165.679	0.256707	-0.129406	0.00984604	-0.0355561	0.00908953	0.0664624	-0.0487891
10031820	CCOc1ccc(cc1)C=O	p-Ethoxybenzaldehyde	3.73	0	0.7672	0.588596	46.9669	0	0	6	0	2	0	0	0	0	0	0	0	1820.47	274.878	88.175	55.9239	47.6426	34.637	28.8273	29.6548	30.5421	164.506	133.659	108.485	114.369	7.70251	7.72333	7.68371	7.40479	7.34437	7.18507	160.058	143.124	158.377	156.894	0.284202	-0.0822362	-0.0490179	0.0151278	-0.0291616	-0.077472	0.0851654
111477	S(CCC)CCC	Propyl sulfide	3.74	0	0.1404	0.0197122	34.8385	0	0	0	0	0	1	0	0	0	0	0	0	1907.65	9.14458	75.8351	32.8038	22.4183	19.4232	10.4293	4.71307	1.01606	106.151	112.584	76.6009	58.968	7.04978	7.0475	7.06198	7.01982	6.89675	6.85152	164.616	144.21	164.107	163.919	0.0507364	-0.006152	-0.022157	0.00793721	-0.0108894	-0.00153091	0.00407311
56108124	NC(=O)c1ccc(C(C)(C)C)cc1	p-(tert-Butyl)benzamide	3.75	0	1.9336	3.73881	55.0839	0	0	6	1	1	0	0	0	0	0	0	0	2054.31	344.857	76.1763	50.4341	29.6386	21.957	24.9665	71.4344	14.369	123.525	106.684	101.059	184.313	7.40271	7.41674	7.21609	7.17748	7.04017	7.92399	163.043	146.343	150.009	164.062	0.276889	-0.200072	0.119254	-0.0217084	-0.0334248	-0.0585088	0.0237332
628762	C(CCCl)CCCl	1,5-Dichloropentane	3.75	0	0.6478	0.419645	29.3904	0	0	0	0	0	0	0	0	2	0	0	2	3244.89	0	96.8567	40.1274	46.2158	58.3928	155.967	0	0	116.261	118.458	125.439	0	7.5905	7.30838	7.41543	7.62954	8.33092	0	165.851	145.653	167.976	169.192	0.0844448	-0.0136367	-0.029933	0.00314526	0.008305	-0.0154701	0.00536717
614802	c1(c(cccc1)O)NC(C)=O	2-Hydroxyacetanilide	3.75	0	-0.2314	0.053546	44.7549	0	0	6	1	2	0	0	0	0	0	0	0	1871.39	3.04819	92.2824	62.1676	51.679	52.2502	24.3192	5.26428	1.01606	156.687	150.338	109.614	58.6224	7.88477	8.04629	7.78704	7.82209	7.79	7.02913	163.038	148.812	162.375	163.664	0.405641	-0.256702	0.107288	0.0311852	-0.209183	0.188058	-0.0803761
121142	c1(cc(ccc1C)[N+](=O)[O-])[N+](=O)[O-]	2,4-Dinitrotoluene	3.75	0	2.2764	5.182	41.6732	0	0	6	2	4	0	0	0	0	0	0	0	2432.21	0	121.861	94.3025	72.5794	68.4036	134.801	16.127	0	166.237	130.622	172.359	82.0136	8.78445	8.1689	8.47529	8.89875	10.6594	9.47117	166.387	153.964	155.641	168.053	0.125034	-0.0256877	-0.0166625	0.0449113	-0.0649018	-0.0410565	0.0621188
95523	c1(c(cccc1)F)C	o-Fluorotoluene	3.75	0	1.7596	3.09619	35.3656	0	0	6	0	0	0	0	1	0	0	0	1	1377.9	0	88.1859	59.6183	25.7738	6.22427	1.01606	0	0	108.355	62.5597	31.0837	0	7.72086	7.70157	7.89035	7.15565	6.71846	0	165.703	143.707	159.668	177.902	0.0891974	-0.0368779	-0.0143085	0.0320855	-0.0253817	-0.00532568	0.00520955
2370630	O=C(OCCOCC)C(=C)C	2-Ethoxy ethyl methacrylate	3.76	0	1.2846	1.6502	41.7549	0	0	0	0	3	0	0	0	0	0	0	0	1936.24	482.194	77.1517	49.0839	36.0625	37.2631	30.3667	31.0977	28.3644	128.306	126.863	107.449	116.611	7.77751	7.93135	7.94361	7.63868	7.41102	7.75871	166.382	147.684	164.064	167.362	0.445216	-0.219741	-0.0576189	0.193532	-0.221725	0.070462	0.0639425
66251	CCCCCC=O	Hexaldehyde	3.76	0	-0.9703	0.941482	25.4766	0	0	0	0	1	0	0	0	0	0	0	0	1133.75	0	58.8205	20.7439	20.439	19.9055	18.7317	8.57153	0	96.6051	90.8821	78.2915	56.5487	7.32718	7.13927	7.18074	7.25331	7.41296	8.09482	166.591	145.821	167.914	168.893	0.137451	-0.0270963	-0.0400965	-0.00442852	-0.000999	0.00212304	0.0155153
98168	c1(cc(ccc1)N)C(F)(F)F	m-(Trifluoromethyl)aniline	3.77	0	1.1092	1.23032	39.7201	0	0	6	1	0	0	0	3	0	0	0	3	2294.96	0	114.078	84.7324	65.468	89.892	15.8532	0	0	140.337	134.477	66.3472	0	8.89977	8.08998	8.51752	9.2448	9.70445	0	183.469	155.738	162.814	185.092	0.407008	-0.274627	0.0591645	0.0123992	-0.12042	0.259749	-0.13977
119324	c1(c(ccc(c1)N)C)[N+](=O)[O-]	4-Amino-2-nitrotoluene	3.77	0	0.8664	0.750649	42.0053	0	0	6	2	2	0	0	0	0	0	0	0	1922.31	0	99.758	73.7246	53.0626	41.3938	14.8485	1.01606	0	142.345	105.194	89.314	31.0837	8.08621	7.83561	7.90839	8.29468	8.71807	6.71846	166.331	153.934	155.616	168.004	0.196484	-0.0975825	0.0137853	-0.060916	0.0329854	0.106356	-0.113671
23060142	CCOC(=O)CC(S)C(=O)OCC	Butanedioic acid, mercapto-, diethyl ester	3.77	0	0.9119	0.831562	49.128	0	0	0	0	4	1	0	0	0	0	0	0	3220.05	533.529	94.1956	70.5307	85.5128	64.573	40.9709	33.4557	25.4061	180.111	154.201	124.799	106.418	8.01975	8.10489	8.45934	8.19111	7.33267	7.84651	164.901	146.237	165.552	160.044	0.565871	-0.32207	0.106061	0.0146911	-0.296725	0.289593	-0.00435235
31502575	C(NC1CCCCC1)(=O)OCCCl	Carbamic acid, N-cyclohexyl-, 2-chloroethyl ester	3.77	0	-0.8069	0.651088	41.7887	0	0	0	1	2	0	0	0	1	0	0	1	3279.47	1300.32	87.7356	40.7827	39.5635	56.1713	49.0118	44.1247	37.152	119.674	128.232	149.168	133.177	7.73589	7.51342	7.55428	8.03011	7.92539	7.49069	167.246	148.807	167.061	169.961	0.409683	-0.313912	0.206991	-0.0600564	-0.0888942	0.074329	-0.018659
2357473	c1(C(F)(F)F)c(ccc(c1)N)F	4-Fluoro-3-(trifluoromethyl)aniline	3.78	0	1.019	1.03836	39.8479	0	0	6	1	0	0	0	4	0	0	0	4	2654.88	0	126.789	106.229	105.397	103.891	19.1504	0	0	157.645	141.176	74.1835	0	9.44574	8.58188	9.39444	9.49464	10.368	0	190.447	158.271	168.659	195.934	0.465538	-0.276523	0.109642	-0.169764	-0.0754867	0.385649	-0.206286
2028639	C([C@@H](C)O)#C	3-Butyn-2-ol	3.78	0	0.3055	0.0933303	19.6254	0	0	0	0	1	0	0	0	0	0	0	0	839.121	0	70.1619	29.6014	8.07267	1.01606	0	0	0	78.0032	31.0837	0	0	7.62041	7.66782	7.19332	6.71846	0	0	163.83	148.452	165.451	169.047	0.244527	-0.13402	0.0179849	0.0163197	-0.0584766	0.0359286	0
619727	c1(ccc(C#N)cc1)[N+](=O)[O-]	4-Nitrobenzonitrile	3.78	0	1.4558	2.11935	39.152	0	0	6	2	2	0	0	0	0	0	0	0	1918.24	0	122.863	85.7137	67.2205	67.9652	193.508	224.098	0	167.666	150.97	282.924	229.458	8.45094	7.92933	8.38046	8.79071	10.0898	11.6709	161.374	148.215	155.493	168.792	0.165535	-0.0561128	-0.044374	0.0825588	0.0197305	-0.096503	-0.0530066
65337135	C([C@@H](C)O)#C	3-Butyn-2-ol	3.78	0	0.3055	0.0933303	19.6254	0	0	0	0	1	0	0	0	0	0	0	0	839.121	0	70.1619	29.6014	8.07267	1.01606	0	0	0	78.0032	31.0837	0	0	7.62041	7.66782	7.19332	6.71846	0	0	163.83	148.452	165.451	169.047	0.244527	-0.13402	0.0179849	0.0163197	-0.0584766	0.0359286	0
393395	c1(C(F)(F)F)c(ccc(c1)F)N	alpha,alpha,alpha,4-Tetrafluoro-o-toluidine	3.78	0	1.019	1.03836	39.8479	0	0	6	1	0	0	0	4	0	0	0	4	2654.88	0	126.789	104.457	98.916	93.6355	19.1504	0	0	164.659	113.643	74.1835	0	9.44574	8.57787	9.12102	10.0827	10.368	0	190.447	158.271	168.877	189.018	0.458722	-0.293333	0.0877258	-0.0840697	0.0273447	0.11655	-0.0835792
768945	C1C2CC3CC1CC(C3)(C2)N	Amantadine	3.78	0	-1.5787	2.49229	44.1259	0	0	0	1	0	0	0	0	0	0	0	0	1656.11	0	70.3084	30.4082	13.6581	6.81307	1.01606	0	0	80.4278	69.4389	31.0837	0	7.13645	7.21387	6.97857	7.0632	6.71846	0	165.099	145.91	158.565	171.945	0.160511	-0.0861655	0.0475202	-0.0738145	0.0472583	-0.0631051	0.0480513
108805	c1(nc(nc(n1)O)O)O	Cyanuric acid	3.79	0	-0.6282	0.394635	24.8325	0	0	6	3	3	0	0	0	0	0	0	0	1792.33	0	136.192	116.161	126.07	15.4577	1.01606	0	0	168.83	83.6645	31.0837	0	9.45308	9.07924	9.81446	9.07373	6.71846	0	177.101	166.461	173.125	172.406	0.774372	-0.754429	0.806478	-0.888353	0.847908	-0.545405	0.146615
89623	c1(c(ccc(c1)C)N)[N+](=O)[O-]	4-Methyl-2-nitroaniline	3.79	0	0.8664	0.750649	42.0053	0	0	6	2	2	0	0	0	0	0	0	0	1922.31	0	99.758	74.4659	53.6831	41.3856	15.0452	1.01606	0	138.533	114.08	88.1908	31.0837	8.08621	7.84332	7.94449	8.14945	8.83393	6.71846	166.331	153.934	155.704	169.839	0.203388	-0.096265	-0.0359694	-0.00659672	0.0898326	-0.00151438	-0.0719383
100005	c1([N+](=O)[O-])ccc(Cl)cc1	1-Chloro-4-nitrobenzene	3.8	0	1.9854	3.94181	38.8897	0	0	6	1	2	0	0	0	1	0	0	1	2834.48	0	139.731	103.524	78.8679	105.268	567.165	0	0	163.367	149.54	330.234	0	8.64983	8.17333	8.64064	9.16539	12.6976	0	160.767	148.485	158.236	169.704	0.0942879	-0.0353711	-0.00388111	0.046038	-0.0369772	-0.0500009	0.0330484
570241	c1(c(c(ccc1)C)N)[N+](=O)[O-]	1-Amino-2-methyl-6-nitrobenzene	3.8	0	0.8664	0.750649	42.0053	0	0	6	2	2	0	0	0	0	0	0	0	1922.31	0	99.758	78.5524	55.2204	30.0548	10.3151	0	0	146.906	95.01	62.4252	0	8.08621	7.84597	8.08148	7.89419	8.41244	0	166.331	153.934	155.641	169.203	0.203734	-0.0980682	-0.0455879	0.0413371	0.0435007	-0.0268609	-0.0161879
578461	c1(c(cc(C)cc1)N)[N+](=O)[O-]	6-Nitro-m-toluidine	3.8	0	0.8664	0.750649	42.0053	0	0	6	2	2	0	0	0	0	0	0	0	1922.31	0	99.758	74.4659	53.6831	29.6037	33.4472	16.127	0	138.533	104.289	85.7713	82.0136	8.08621	7.84332	7.94449	8.13777	7.58862	9.47117	166.331	153.934	155.704	169.839	0.203261	-0.0966298	-0.0360946	0.0015596	0.114599	-0.115018	0.0511271
123864	O(CCCC)C(C)=O	n-Butyl acetate	3.81	0	-0.5943	0.353192	28.1502	0	0	0	0	2	0	0	0	0	0	0	0	1389.71	9.14458	68.3597	28.7773	29.7603	24.3804	26.202	8.47466	1.01606	115.607	101.333	110.815	74.7309	7.6284	7.65292	7.52099	7.5154	7.43159	7.42867	167.534	147.615	169.519	166.255	0.263471	-0.159564	0.0817593	-0.0507287	-0.00363012	-0.00962487	0.0212624
95476	c1(c(cccc1)C)C	2-Xylene	3.81	0	2.2962	5.27253	39.5198	0	0	6	0	0	0	0	0	0	0	0	0	1164.27	0	70.8435	43.1369	16.9845	3.97367	1.01606	0	0	113.302	53.3912	31.0837	0	7.08382	7.18386	7.05242	6.82491	6.71846	0	159.085	141.421	149.63	158.725	0.0420114	0.00113106	-0.00465623	-0.0174177	-0.0266379	0.0162866	0.0102884
607001	O=CN(c1ccccc1)c1ccccc1	Diphenylformamide	3.81	0	1.2095	1.46289	69.3609	0	0	12	1	1	0	0	0	0	0	0	0	2338.77	249.249	94.8602	63.11	60.9089	56.8568	42.6689	25.412	14.6617	193.382	186.77	161.239	125.147	7.51858	7.48461	7.53104	7.62329	7.46846	7.19285	156.889	142.6	155.093	155.785	0.240875	-0.0928902	0.00470397	-0.0582603	0.0240002	0.0179049	-0.00240715
500221	c1cc(cnc1)C=O	3-Pyridinaldehyde	3.82	0	-0.5627	0.316631	32.5352	0	0	6	1	1	0	0	0	0	0	0	0	1322.83	0	100.807	62.0441	40.3902	39.0895	8.57153	0	0	118.986	112.731	56.5487	0	7.87606	7.6305	7.87799	7.86287	8.09482	0	160.157	144.634	155.534	172.583	0.222376	-0.0402637	-0.0883862	-0.0139825	0.0461472	0.0010157	-0.0157185
106445	c1(ccc(O)cc1)C	p-Cresol	3.82	0	1.2867	1.6556	36.8433	0	0	6	0	1	0	0	0	0	0	0	0	1273.95	0	81.4306	46.8228	19.5836	16.7169	15.122	1.01606	0	100.265	71.5009	90.1944	31.0837	7.49269	7.52645	7.26244	7.04594	8.88278	6.71846	159.522	143.622	153.002	165.836	0.21353	-0.112129	0.0321381	-0.0322943	-0.0292665	0.0553618	-0.0387778
371404	c1cc(ccc1N)F	4-Fluoroaniline	3.82	0	0.1165	0.0135722	34.6334	0	0	6	1	0	0	0	1	0	0	0	1	1428.82	0	95.6199	57.5802	28.296	32.9357	19.1504	0	0	101.077	69.2807	74.1835	0	7.98254	7.93093	7.71501	7.48023	10.368	0	170.362	152.027	167.06	178.173	0.2014	-0.117867	0.0543982	-0.0331227	-0.0864414	0.133527	-0.0511944
108383	c1c(cccc1C)C	3-Xylene	3.82	0	2.2962	5.27253	39.5198	0	0	6	0	0	0	0	0	0	0	0	0	1164.27	0	70.8435	39.4682	18.4989	8.41008	1.01606	0	0	105.613	86.8523	31.0837	0	7.08382	7.18314	6.98655	6.98458	6.71846	0	159.085	141.421	149.465	164.176	0.0420011	0.00153773	-0.00326442	-0.0308935	0.00155587	-0.00719614	0.0172599
108907	c1ccc(cc1)Cl	Chlorobenzene	3.82	0	1.7721	3.14034	35.672	0	0	6	0	0	0	0	0	1	0	0	1	2127.37	0	112.659	70.5226	46.8214	12.5886	0	0	0	117.528	62.4429	0	0	7.57592	7.5129	7.50156	7.48138	0	0	154.459	139.367	156.952	166.998	0.0558592	-0.0190267	-0.00757678	-0.00115739	-3.41e-05	-0.000135	0
110623	C(CC=O)CC	Pentanal	3.83	0	-0.6823	0.465533	22.565	0	0	0	0	1	0	0	0	0	0	0	0	987.449	0	59.3528	20.439	19.9055	18.7317	8.57153	0	0	90.8821	78.2915	56.5487	0	7.38993	7.18074	7.25331	7.41296	8.09482	0	166.787	146.116	168.893	170.604	0.133191	-0.0271328	-0.0381975	-0.00491724	0.0018872	0.0155082	-0.0137433
756809	P(OC)(OC)(S)=S	O,O-Dimethyl dithiophosphate	3.83	0	1.4836	2.20107	37.7344	0	0	0	0	2	2	1	0	0	0	0	0	3822.64	0	266.648	145.101	31.097	6.56158	1.01606	0	0	132.355	72.9102	31.0837	0	8.04476	7.88451	8.12273	6.91805	6.71846	0	160.253	143.785	142.679	154.034	0.299267	-0.183301	0.118192	-0.0403944	-0.120112	0.050291	0.0256917
3302101	OC(=O)C[C@@H](CC(C)(C)C)C	Hexanoic acid, 3,5,5-trimethyl-	3.83	1	1.8058	3.26091	44.1852	0	0	0	0	2	0	0	0	0	0	0	0	1828.6	9.14458	62.871	29.3983	21.7498	23.5383	20.0736	15.5527	1.01606	90.2705	117.046	68.4535	86.6883	7.43105	7.36786	7.05889	7.56171	7.08035	9.13495	166.916	146.761	155.926	172.151	0.328986	-0.225695	0.143257	-0.137474	0.103349	-0.14072	0.212409
97530	COc1cc(ccc1O)CC=C	Eugenol	3.84	0	1.1748	1.38016	52.8865	0	0	6	0	2	0	0	0	0	0	0	0	1966.77	108.961	84.3406	62.9763	44.4091	33.8305	27.239	19.3107	9.08006	155.279	135.365	114.007	87.1813	7.61376	7.68216	7.53529	7.53801	7.39257	7.32605	160.744	144.613	152.964	158.597	0.375309	-0.162206	-0.0993429	0.177782	-0.103725	-0.0589006	0.0699535
3179906	c12c(c(ccc1NCCO)NCCO)C(c1c(ccc(c1C2=O)O)O)=O	C.I. Disperse Blue 7	3.84	0	-2.238	5.00864	100.168	0	0	12	2	6	0	0	0	0	0	0	0	4543.24	4488.8	101.32	82.8484	89.0157	80.193	66.4316	61.005	46.7583	220.578	204.074	185.565	167.697	8.11762	7.94456	8.09314	8.09697	8.05767	8.13553	162.409	148.489	157.752	155.74	1.27286	-0.568559	-0.0916418	-0.159768	-0.161704	0.750569	-0.36976
108418	c1c(cccc1Cl)C	m-Chlorotoluene	3.84	0	2.2185	4.92174	39.954	0	0	6	0	0	0	0	0	1	0	0	1	2273.66	0	101.359	68.1523	48.9125	16.2856	1.01606	0	0	125.605	90.3272	31.0837	0	7.45923	7.48595	7.26636	7.61443	6.71846	0	156.676	140.363	151.796	164.324	0.0541944	-0.0177501	0.0013899	-0.0236001	0.0229967	-0.0154876	0.00535395
554847	c1(cc(ccc1)O)[N+](=O)[O-]	3-Nitrophenol	3.84	0	1.0536	1.11007	35.779	0	0	6	1	3	0	0	0	0	0	0	0	1834.77	0	115.916	77.9944	63.568	82.2519	13.1048	0	0	141.875	136.26	71.8277	0	8.60615	8.16591	8.43933	9.35808	8.92063	0	163.53	151.42	159.054	170.633	0.256622	-0.122973	0.0240986	-0.0580952	-0.00102808	0.0872495	-0.0575629
106230	C(CC/C=C(/C)C)(CC=O)C	Citronellal	3.84	0	2.0432	4.17467	48.3847	0	0	0	0	1	0	0	0	0	0	0	0	1716.9	511.667	61.0167	28.9663	22.2111	21.2803	27.3012	23.0116	12.7917	103.862	101.837	116.571	120.244	7.23066	7.19605	7.06901	7.21133	7.16891	7.21532	164.894	144.668	158.289	166.711	0.159412	-0.0228092	-0.0400726	-0.0466808	0.0435241	-0.022486	0.00398728
84662	CCOC(=O)c1ccccc1C(=O)OCC	Diethyl phthalate	3.84	0	1.5354	2.35745	61.08	0	0	6	0	4	0	0	0	0	0	0	0	2769.27	643.594	92.1708	69.023	83.8677	72.1547	47.0911	29.5384	15.3237	208.198	187.376	169.871	119.042	7.93172	7.86098	8.36244	8.55647	7.57494	7.57682	161.739	144.391	159.361	155.374	0.563559	-0.339522	0.0756481	0.0443698	-0.2197	0.292904	-0.0884128
764012	C(#CC)CO	2-Butynol	3.84	0	0.7837	0.614186	21.3423	0	0	0	0	1	0	0	0	0	0	0	0	839.121	0	70.1619	41.1103	37.8295	6.65844	1.01606	0	0	141.593	54.728	31.0837	0	7.62041	7.37171	7.53424	7.58419	6.71846	0	163.83	148.452	156.871	153.154	0.232349	-0.106265	-0.0264722	0.0305137	-0.00991061	-0.0270727	0.0230325
2212671	N1(C(SCC)=O)CCCCCC1	Molinate	3.84	0	-0.3019	0.0911436	46.2974	0	0	0	1	1	1	0	0	0	0	0	0	2795.66	141.392	87.532	46.6679	37.6697	40.4009	26.2339	13.1694	4.71307	126.123	123.765	128.443	88.3492	7.39227	7.31767	7.52025	7.55636	7.38342	6.93919	165.13	146.258	162.679	165.169	0.229954	-0.15949	0.0658839	0.025798	-0.0426333	0.0115414	-0.0332079
2163793	CN(C)C(=O)NC1CC2CC1C3CCCC23	Noruron	3.84	0	-1.1567	1.33795	57.0775	0	0	0	2	1	0	0	0	0	0	0	0	2546.15	940.354	75.8223	36.0185	27.274	31.5483	32.7256	26.8813	17.414	113.271	117.574	126.048	114.764	7.35758	7.29508	7.3421	7.3355	7.41272	7.30843	166.433	147.66	159.558	169.551	0.313905	-0.239175	0.168087	-0.021161	-0.11883	0.0701213	-0.0362444
1119400	C(=O)(CCCC(=O)OC)OC	Dimethyl glutarate	3.85	0	-0.196	0.038416	35.9868	0	0	0	0	4	0	0	0	0	0	0	0	2045.91	337.788	85.2421	50.9171	41.0459	36.6518	51.6309	38.7951	25.9837	137.444	117.623	115.463	103.288	8.12226	7.98823	8.25318	7.85511	7.86735	7.43013	167.321	148.396	163.294	165.89	0.512947	-0.301504	0.0923902	0.0764092	-0.0625663	-0.371315	0.401011
813785	COP(=O)(O)OC	Dimethyl phosphate	3.85	1	-0.0428	0.00183184	23.3297	0	0	0	0	4	0	1	0	0	0	0	0	2278.89	0	188.869	92.5796	21.8459	6.56158	1.01606	0	0	101.392	72.9102	31.0837	0	8.70303	8.51534	9.15509	6.91805	6.71846	0	171.413	152.449	155.415	179.35	0.578559	-0.572614	0.517069	-0.112104	-0.235277	0.0878092	0.0258357
616864	[O-][N+](=O)c1c(N)ccc(OCC)c1	4-Ethoxy-2-nitroaniline	3.85	0	0.1718	0.0295152	48.6606	0	0	6	2	3	0	0	0	0	0	0	0	2324.57	167.398	100.171	73.2323	69.8143	50.5756	38.3895	37.5626	11.1598	174.342	135.978	123.367	117.814	8.17249	8.07175	8.21295	8.05427	7.76423	8.19305	167.059	153.812	162.786	164.475	0.333274	-0.13865	-0.011219	-0.0810685	-0.0187303	0.203472	-0.100398
115902	P(Oc1ccc([S@@](C)=O)cc1)(OCC)(OCC)=S	Fensulfothion	3.85	0	1.5967	2.54945	83.4537	0	0	6	0	4	2	1	0	0	0	0	0	5643.11	3218.21	162.833	99.5568	99.8262	67.5343	64.896	62.753	51.9066	211.059	173.079	169.417	139.521	7.83941	7.94251	8.14489	8.06357	7.54709	7.3011	160.136	142.541	157.355	151.68	0.481459	-0.335816	0.270947	-0.106453	-0.0357484	-0.0956824	0.0277946
106898	C1[C@@H](O1)CCl	Epichlorohydrin	3.86	0	0.563	0.316969	20.057	0	0	0	0	1	0	0	0	1	0	0	1	1950.54	0	115.918	85.6488	12.5886	0	0	0	0	62.4429	0	0	0	8.16412	8.11799	7.48138	0	0	0	165.858	147.191	170.883	182.058	0.204932	-0.0395032	-0.0870182	0.0317233	-0.00766805	0	0
91656	N(C1CCCCC1)(CC)CC	Cyclohexyldiethylamine	3.86	0	-0.7718	0.595675	40.8349	0	0	0	1	0	0	0	0	0	0	0	0	1660.17	12.1928	59.7836	28.5576	24.0961	15.3939	8.57359	3.65678	1.01606	120.851	94.6985	70.6679	51.0011	7.0842	7.19575	7.1053	6.98249	6.88075	6.8135	167.577	147.528	166.848	162.8	0.127225	-0.0119051	-0.0261914	-0.0366604	-0.0108832	-0.00670445	0.00970627
105679	c1(c(ccc(c1)C)O)C	2,4-Dimethylphenol	3.87	0	1.7331	3.00364	41.1253	0	0	6	0	1	0	0	0	0	0	0	0	1420.24	0	77.4404	53.7699	23.9727	13.8465	4.54255	1.01606	0	115.5	84.5203	45.8614	31.0837	7.41371	7.50801	7.40668	7.04823	7.25954	6.71846	160.473	143.736	149.7	163.905	0.212394	-0.113438	0.0270824	0.00981122	-0.0778052	0.0564641	-0.0265155
120218	O=Cc1ccc(N(CC)CC)cc1	4-(Diethylamino)benzaldehyde	3.87	0	1.2872	1.65688	58.2363	0	0	6	1	1	0	0	0	0	0	0	0	2054.31	549.757	77.7451	50.2637	40.9784	24.7301	19.7615	29.6548	30.5421	161.947	117.256	94.6664	114.369	7.40271	7.42844	7.37256	7.15	7.04182	7.18507	163.043	145.797	161.267	155.667	0.240372	-0.0489611	-0.0533289	-0.0044463	-0.0302179	-0.0661183	0.0707087
5673074	COc1c(C)c(OC)ccc1	2,6-Dimethoxytoluene	3.88	0	0.8526	0.726927	48.5248	0	0	6	0	2	0	0	0	0	0	0	0	1822.51	9.14458	83.643	73.0696	47.3376	22.5107	8.69801	6.56158	1.01606	166.865	113.159	63.637	72.9102	7.61694	7.79904	7.87799	7.25503	7.20731	6.91805	162.22	145.148	150.206	156.231	0.297323	-0.0830086	-0.0776899	0.0118821	0.0462183	-0.0438879	-0.0619241
57147	N(C)(C)N	1,1-Dimethylhydrazine	3.88	0	-0.3777	0.142657	19.5755	0	0	0	2	0	0	0	0	0	0	0	0	689.049	0	57.5957	12.8616	1.01606	0	0	0	0	31.0837	0	0	0	7.436	7.55309	6.71846	0	0	0	179.618	168.416	169.817	184.918	0.183644	-0.00628855	-0.102888	-0.0645492	0.0819042	0	0
95487	c1(c(cccc1)O)C	Orthocresol	3.89	0	1.2867	1.6556	36.8433	0	0	6	0	1	0	0	0	0	0	0	0	1273.95	0	81.4306	52.5106	21.5988	4.9364	1.01606	0	0	108.71	57.1501	31.0837	0	7.49269	7.53209	7.57163	6.98227	6.71846	0	159.522	143.622	153.001	164.729	0.21421	-0.114532	0.0166021	0.0267766	-0.0716507	0.0169816	0.0187174
1891958	Clc1cc(cc(c1O)Cl)C#N	Chloroxynil	3.89	0	1.4168	2.00732	46.9722	0	0	6	1	1	0	0	0	2	0	0	2	3978.47	0	161.584	177.918	190.709	159.901	118.103	14.1191	0	239.927	194.591	172.097	86.9662	8.6174	8.55328	8.70321	8.84132	9.39425	8.27885	155.38	142.002	151.316	163.771	0.346697	-0.159042	-0.0536809	0.166955	-0.202312	0.00594595	0.124633
42087809	c1(c(cc(Cl)cc1)[N+](=O)[O-])C(OC)=O	Methyl 4-chloro-2-nitrobenzoate	3.89	0	1.801	3.2436	49.658	0	0	6	1	4	0	0	0	1	0	0	1	3636.98	107.201	135.06	122.324	115.384	138.14	87.497	35.3106	35.7336	211.81	199.32	148.834	92.7994	8.81595	8.38626	8.97106	9.44757	8.27995	8.00206	162.253	148.593	152.657	163.555	0.364388	-0.17057	0.0442393	-0.0101008	-0.122488	0.0422507	0.0689765
619501	COC(=O)c1ccc(cc1)[N+](=O)[O-]	Methyl p-nitrobenzoate	3.89	0	1.4323	2.05148	44.9418	0	0	6	1	4	0	0	0	0	0	0	0	2381.29	426.685	114.376	91.7412	68.1937	58.1331	56.8285	88.1806	85.337	171.785	160.605	136.436	122.663	8.54809	8.10627	8.60832	8.40538	7.8001	8.8458	163.091	148.948	153.644	165.307	0.339237	-0.188058	-0.0194299	0.156178	-0.00183543	-0.177958	-0.0844965
108598	C(C(OC)=O)C(OC)=O	Methyl malonate	3.9	0	0.0572	0.00327184	28.526	0	0	0	0	4	0	0	0	0	0	0	0	1753.32	9.14458	96.1481	74.6896	69.556	38.7951	25.9837	12.1071	1.01606	152.366	103.288	108.283	114.737	8.52101	8.80725	8.93142	7.43013	9.32266	7.11763	167.948	149.914	162.448	165.351	0.53057	-0.254925	0.096843	-0.354118	0.327484	0.0639472	-0.184673
95658	c1(c(ccc(c1)O)C)C	3,4-Dimethylphenol	3.9	0	1.7331	3.00364	41.1253	0	0	6	0	1	0	0	0	0	0	0	0	1420.24	0	77.4404	52.5162	25.3228	11.207	6.65844	1.01606	0	119.935	66.7598	54.728	31.0837	7.41371	7.50402	7.25361	7.17804	7.58419	6.71846	160.473	143.736	149.858	159.773	0.211932	-0.111286	0.0382834	-0.0446545	0.00194802	0.00664572	-0.0151123
108430	c1c(cccc1Cl)O	3-Chlorophenol	3.91	0	1.209	1.46168	37.2775	0	0	6	0	1	0	0	0	1	0	0	1	2383.34	0	119.084	82.4141	82.1689	16.9556	1.01606	0	0	134.123	84.8733	31.0837	0	8.02021	7.97148	7.94065	8.00669	6.71846	0	156.843	142.908	156.662	167.55	0.227705	-0.125608	0.0424199	-0.0787672	0.0844195	-0.0502671	0.0139506
618859	c1(cc(cc(c1)C)[N+](=O)[O-])[N+](=O)[O-]	3,5-Dinitrotoluene	3.91	0	2.2764	5.182	41.6732	0	0	6	2	4	0	0	0	0	0	0	0	2432.21	0	121.861	90.216	69.9462	108.129	55.8675	0	0	158.53	187.264	98.7405	0	8.78445	8.16625	8.33476	9.23566	9.787	0	166.387	153.964	155.704	168.581	0.124253	-0.0240486	-0.00237813	0.00394183	-0.0541681	0.019861	-0.00533445
118616	CCOC(=O)c1ccccc1O	Ethyl salicylate	3.92	0	0.9063	0.82138	47.6234	0	0	6	0	3	0	0	0	0	0	0	0	2076.44	59.6051	93.0845	67.7611	71.751	47.9646	34.4805	13.883	3.97367	175.282	155.434	144.036	93.046	7.95929	7.90085	8.39137	8.21024	7.61369	7.27327	161.213	145.046	158.778	160.22	0.481382	-0.275279	0.0279526	-0.104825	0.29906	-0.181167	-0.0317873
613456	COc1ccc(C=O)c(OC)c1	2,4-Dimethoxybenzaldehyde	3.92	0	0.0182	0.000331	49.3166	0	0	6	0	3	0	0	0	0	0	0	0	2076.44	60.5737	95.0791	82.1294	61.9768	37.5599	27.5745	22.5916	4.03825	177.481	125.847	102.292	110.239	7.95929	7.99995	7.99979	7.54928	8.04945	7.2404	161.213	144.796	150.053	155.608	0.418855	-0.0995818	-0.114667	-0.104935	0.191004	-0.0744424	-0.042815
2216515	C1[C@H]([C@@H](C[C@@H](C)C1)O)C(C)C	Levomenthol	3.92	0	0.6563	0.43073	44.9238	0	0	0	0	1	0	0	0	0	0	0	0	1718.93	18.2892	60.6764	31.4379	21.8124	11.8148	8.93283	7.35379	1.01606	101.648	80.4688	64.8328	78.8854	7.19762	7.23853	7.16768	7.23847	6.83986	6.94656	166.185	145.671	159.459	166.777	0.237955	-0.112027	-0.00848631	-0.00267003	0.0544941	-0.116596	0.067693
79345	C(C(Cl)Cl)(Cl)Cl	Tetrachloroethane	3.92	0	2.3992	5.75616	30.7638	0	0	0	0	0	0	0	0	4	0	0	4	5317.37	0	267.377	574.529	0	0	0	0	0	0	0	0	0	9.60256	10.1166	0	0	0	0	162.008	145.302	173.657	0	0.173201	-0.0400585	-0.0866006	0.0400585	0	0	0
89781	CC(C)[C@@H]1CC[C@@H](C)C[C@H]1O	Racementhol	3.92	0	0.6563	0.43073	44.9238	0	0	0	0	1	0	0	0	0	0	0	0	1718.93	18.2892	60.6764	31.4379	21.8124	11.8148	8.93283	7.35379	1.01606	101.648	80.4688	64.8328	78.8854	7.19762	7.23853	7.16768	7.23847	6.83986	6.94656	166.185	145.671	159.459	166.777	0.237955	-0.112027	-0.00848631	-0.00267003	0.0544941	-0.116596	0.067693
99525	c1(cc(c(N)cc1)C)[N+](=O)[O-]	4-Nitro-o-toludine	3.92	0	0.8664	0.750649	42.0053	0	0	6	2	2	0	0	0	0	0	0	0	1922.31	0	99.758	73.7246	44.1667	37.5444	44.3265	16.127	0	136.74	100.092	93.7062	82.0136	8.08621	7.83561	7.89347	7.69601	8.99091	9.47117	166.331	153.934	155.616	167.93	0.194228	-0.101366	0.0248918	0.0147954	-0.113397	0.0661534	0.0747134
822866	Cl[C@@H]1CCCC[C@H]1Cl	1,2-Dichlorocyclohexane, trans-	3.92	0	0.2358	0.0556016	29.6734	0	0	0	0	0	0	0	0	2	0	0	2	3389.15	0	102.124	75.8132	35.4105	12.5886	0	0	0	99.1663	62.4429	0	0	7.58772	7.51914	7.49483	7.48138	0	0	163.681	143.557	164.641	172.018	0.0889176	-0.0196019	-0.0426563	0.0282594	-0.00180247	-0.00865751	0
121733	c1(cc(ccc1)Cl)[N+](=O)[O-]	1-Chloro-3-nitrobenzene	3.92	0	1.9854	3.94181	38.8897	0	0	6	1	2	0	0	0	1	0	0	1	2834.48	0	139.731	103.524	101.253	177.976	16.127	0	0	171.824	185.907	82.0136	0	8.64983	8.17333	8.66722	9.82332	9.47117	0	160.767	148.485	158.236	169.674	0.0965973	-0.0293757	0.0014334	-0.00416408	-0.025968	0.0260091	-0.0162335
5464711	C(=O)([C@@H](O)C)OCCCCCCCC	Propanoic acid, 2-hydroxy-, octyl ester	3.93	0	-2.3223	5.39308	46.1583	0	0	0	0	3	0	0	0	0	0	0	0	2377.16	1320.08	66.7831	32.8524	27.5859	28.3914	25.9636	26.6112	27.5017	113.527	117.911	108.21	107.633	7.52242	7.46643	7.48615	7.35386	7.32684	7.38046	167.202	147.294	166.921	167.709	0.508325	-0.274058	-0.0964928	0.28114	-0.178359	-0.0135399	0.0218011
496117	c12c(CCC1)cccc2	Indan	3.93	0	0.849	0.720801	41.158	0	0	6	0	0	0	0	0	0	0	0	0	1308.54	0	78.1856	35.3117	23.7104	6.33976	1.01606	0	0	125.809	71.2371	31.0837	0	7.10786	7.10492	7.05374	6.91006	6.71846	0	157.386	139.958	155.575	159.029	0.0424952	0.00221809	-0.011306	-0.011308	-0.0181052	0.00280338	0.01445
108861	c1(ccccc1)Br	Bromobenzene	3.93	0	1.8561	3.44511	38.49	0	0	6	0	0	0	0	0	0	1	0	1	7255.31	0	157.154	125.641	98.7844	27.5251	0	0	0	128.297	70.0114	0	0	7.43311	7.38275	7.33239	7.26019	0	0	152.077	138.284	154.221	163.301	0.0467074	-0.0136693	-0.00879336	-0.00252637	-2.14e-05	0.00165668	0
271896	c12c(occ1)cccc2	Benzofuran	3.93	0	0.5537	0.306584	40.2428	0	0	9	0	1	0	0	0	0	0	0	0	1416.18	0	100.693	56.7103	38.3592	7.82082	1.01606	0	0	152.733	77.1543	31.0837	0	7.59911	7.54274	7.48404	7.14744	6.71846	0	153.954	139.986	153.389	156.968	0.150434	-0.0488607	-0.0271843	0.0147608	-0.0224912	-0.00658966	0.0151481
618871	c1(cc(cc(c1)N)[N+](=O)[O-])[N+](=O)[O-]	3,5-Dinitroaniline	3.93	0	0.6333	0.401069	40.941	0	0	6	3	4	0	0	0	0	0	0	0	2483.13	0	129.514	96.5248	79.2081	127.833	67.746	0	0	160.879	184.991	106.216	0	9.04707	8.37474	8.60584	9.79475	10.0277	0	170.049	161.005	160.792	172.2	0.240475	-0.0999588	0.0505961	-0.0938396	-0.0451524	0.146579	-0.0784616
96173	C([C@@H](C=O)C)C	2-Methylbutyraldehyde	3.94	0	-0.1343	0.0180365	24.4583	0	0	0	0	1	0	0	0	0	0	0	0	987.449	0	59.3528	27.1179	13.6032	4.03825	0	0	0	76.5112	41.2697	0	0	7.38993	7.24617	7.42082	7.269	0	0	166.787	146.116	164.074	173.311	0.133175	-0.0315925	-0.0450469	0.0244134	-0.00556628	-0.00879502	0
111308	C(CC=O)CC=O	Glutaral	3.94	0	-0.6032	0.36385	24.5978	0	0	0	0	2	0	0	0	0	0	0	0	1241.39	0	75.5887	29.0209	32.0891	39.7595	72.3095	0	0	109.244	107.277	102.875	0	7.87691	7.49438	7.71174	8.25513	9.75313	0	165.614	145.632	168.375	170.109	0.241479	-0.0488433	-0.0594376	0.0106242	0.0122178	-0.0748975	0.0395967
464482	CC1(C)[C@H]2CC[C@]1(C)C(=O)C2	Camphor, (1S,4S)-(-)-	3.95	0	0.9693	0.939542	43.7625	0	0	0	0	1	0	0	0	0	0	0	0	1714.87	0	70.4565	44.4762	14.6536	2.5085	0	0	0	96.5541	36.1139	0	0	7.2686	7.35864	7.23391	6.99034	0	0	163.41	142.787	152.19	163.233	0.13585	-0.0505136	-0.0171252	0.0223331	-0.0148136	-0.0078055	0
1745819	c1(c(cccc1)O)CC=C	2-Allylphenol	3.95	0	1.6734	2.80027	46.243	0	0	6	0	1	0	0	0	0	0	0	0	1564.51	2.03213	80.7816	51.1791	36.7692	27.8957	14.6805	4.34337	1.01606	142.003	121.815	93.4422	56.1796	7.42005	7.41741	7.47996	7.28098	7.21446	6.83821	158.789	142.889	154.268	160.575	0.239901	-0.119071	-0.00268241	0.017763	-0.0184768	0.0103962	-0.0420798
91667	c1(N(CC)CC)ccccc1	N,N-Diethylaniline	3.96	0	1.6752	2.8063	53.1625	0	0	6	1	0	0	0	0	0	0	0	0	1654.08	6.09638	70.7859	41.2822	35.8965	20.8524	11.0255	4.71307	1.01606	157.388	114.491	80.6164	58.968	7.16861	7.3151	7.2042	7.03695	6.91518	6.85152	163.575	146.237	163.965	155.33	0.126975	-0.0183628	-0.013377	-0.0325501	-0.0155164	-0.016507	0.0105111
121879	c1(cc(c(N)cc1)Cl)[N+](=O)[O-]	1-Amino-2-chloro-4-nitrobenzene	3.96	0	0.7887	0.622048	42.4395	0	0	6	2	2	0	0	0	1	0	0	1	3031.7	0	133.788	118.024	83.1905	120.809	119.109	16.127	0	161.641	145.555	158.212	82.0136	8.62611	8.26767	8.50143	8.76279	9.97486	9.47117	165.431	155.288	159.114	170.16	0.214742	-0.111462	0.00909292	0.0652204	-0.147869	0.0503779	0.090201
821556	C(CCCCC)CC(C)=O	2-Nonanone	3.97	0	-1.6078	2.58502	35.7763	0	0	0	0	1	0	0	0	0	0	0	0	1572.63	477.732	57.9335	22.7848	21.0793	20.9412	20.7439	20.439	19.9055	103.473	101.992	99.8754	96.6051	7.2196	7.22131	7.09365	7.11243	7.13927	7.18074	166.254	145.33	165.687	166.839	0.138549	-0.0429099	0.00292741	-0.0339583	0.00167499	-0.000173	-0.000773
498668	C1C[C@@H]2C[C@H]1C=C2	Bicyclo(2.2.1)heptene	3.97	0	0.4292	0.184213	29.6932	0	0	0	0	0	0	0	0	0	0	0	0	1020.01	0	70.8435	14.106	3.31076	1.01606	0	0	0	48.3912	31.0837	0	0	7.05696	7.0127	6.80105	6.71846	0	0	160.985	141.421	161.781	178.339	0.0345702	-0.00151406	-0.00690227	-0.0279568	0.0128879	0.00620007	0
706149	O1[C@@H](CCC1=O)CCCCCC	Decan-4-olide	3.98	0	-1.7834	3.18052	37.6071	0	0	0	0	2	0	0	0	0	0	0	0	1972.87	705.682	69.7599	27.0391	25.7192	25.6298	26.3363	27.3688	23.5227	113.046	110.9	110.719	110.454	7.4347	7.35561	7.26777	7.25414	7.30419	7.37734	165.579	145.246	166.286	165.883	0.276362	-0.164795	0.0846839	-0.0397292	-0.0199061	-0.00184218	0.000915
111717	C(CCC=O)CCC	N-Heptanal	3.98	0	-1.2583	1.58332	28.3882	0	0	0	0	1	0	0	0	0	0	0	0	1280.04	51.4292	58.4404	20.9412	20.7439	20.439	19.9055	18.7317	8.57153	99.8754	96.6051	90.8821	78.2915	7.28154	7.11243	7.13927	7.18074	7.25331	7.41296	166.448	145.611	167.282	167.914	0.141704	-0.0270929	-0.0421866	-0.00420107	-0.00051	-0.000763	0.00213018
108429	c1c(cccc1Cl)N	3-Chloroaniline	3.98	0	0.5754	0.331085	39.2218	0	0	6	1	0	0	0	0	1	0	0	1	2324.58	0	109.734	74.7148	62.2199	16.5091	1.01606	0	0	124.039	87.2416	31.0837	0	7.70222	7.70673	7.53343	7.74346	6.71846	0	160.691	148.444	158.2	169.577	0.168392	-0.0994713	0.0435937	-0.0729805	0.0784854	-0.0497217	0.0158985
111875	C(CCCC)CCCO	1-Octanol	3.98	0	-2.1254	4.51733	30.6451	0	0	0	0	1	0	0	0	0	0	0	0	1428.37	309.253	54.7677	19.5915	19.233	18.7401	18.0197	16.867	14.7263	97.4627	94.762	90.8148	84.4993	7.20771	7.07164	7.08497	7.1033	7.13009	7.17295	167.716	147.276	167.519	168.022	0.238463	-0.1005	-0.0382717	0.0153304	0.00131774	-6.51e-05	-0.000372
939231	c1(c2ccncc2)ccccc1	4-Phenylpyridine	3.98	0	0.7308	0.534069	55.9019	0	0	12	1	0	0	0	0	0	0	0	0	1792.25	16.1512	92.3793	55.2416	46.6746	42.9094	31.0252	19.3078	5.38373	181.855	163.1	126.481	87.7224	7.31493	7.28616	7.20044	7.19794	7.24383	7.23921	155.726	140.916	151.886	152.159	0.133199	-0.0172753	-0.0416892	-0.0271471	-0.0106432	0.0240616	0.00672782
606202	c1(c(c([N+](=O)[O-])ccc1)C)[N+](=O)[O-]	2,6-Dinitrotoluene	3.99	0	2.2764	5.182	41.6732	0	0	6	2	4	0	0	0	0	0	0	0	2432.21	0	121.861	98.389	82.364	55.7179	99.2207	0	0	181.464	118.343	116.988	0	8.78445	8.17155	8.62045	8.99158	10.1315	0	166.387	153.964	155.579	167.415	0.126298	-0.0265333	-0.0347652	0.059392	-0.0220594	-0.0759855	0.0368024
127184	C(=C(\Cl)Cl)(\Cl)Cl	Tetrachloroethylene	4	0	2.4288	5.89907	30.9454	0	0	0	0	0	0	0	0	4	0	0	4	5315.34	0	369.485	1256.7	0	0	0	0	0	0	0	0	0	10.5639	12.0756	0	0	0	0	154.371	142.174	168.159	0	0.134522	-0.0448406	-0.0672609	0.0448406	0	0	0
6575093	Cc1cccc(Cl)c1C#N	2-Chloro-6-methylbenzonitrile	4	0	2.0576	4.23372	44.9325	0	0	6	1	0	0	0	0	1	0	0	1	2613.11	0	113.799	102.176	84.3848	24.7417	4.29181	0	0	180.528	106.857	45.0544	0	7.68201	7.63676	7.65081	7.88541	7.10856	0	156.454	140.173	148.845	158.497	0.147203	-0.0397508	-0.043827	-0.0460298	0.114565	-0.0480187	-0.0105404
100414	CCc1ccccc1	Ethylbenzene	4.01	0	1.5147	2.29432	40.0862	0	0	6	0	0	0	0	0	0	0	0	0	1164.27	0	70.8435	34.7234	22.3652	12.0681	4.71307	1.01606	0	123.307	85.776	58.968	31.0837	7.08382	7.08898	7.05348	6.93567	6.85152	6.71846	159.085	141.421	156.835	158.968	0.0478875	-0.00115142	-0.0155018	-0.00932301	-0.0125534	0.00590274	0.00436854
527606	c1(c(cc(cc1C)C)C)O	2,4,6-Trimethylphenol	4.02	0	2.1795	4.75022	45.4073	0	0	6	0	1	0	0	0	0	0	0	0	1566.54	0	74.5385	58.6837	28.6643	14.4488	2.54103	1.01606	0	128.033	102.397	37.4741	31.0837	7.35627	7.49497	7.4848	7.11053	6.95244	6.71846	161.164	143.819	147.365	162.97	0.211284	-0.114729	0.0216377	0.0501074	-0.114604	0.0409174	-0.00717682
552896	c1(c(cccc1)[N+](=O)[O-])C=O	2-Nitrobenzaldehyde	4.02	0	1.2287	1.5097	39.2473	0	0	6	1	3	0	0	0	0	0	0	0	1979.03	0	117.436	87.2194	80.877	66.254	12.3493	0	0	175.497	126.672	69.2812	0	8.53954	7.96366	8.52142	9.22336	8.78299	0	161.234	147.877	154.543	165.833	0.206323	-0.0326845	-0.0683396	-0.00600902	-0.00458898	0.0359281	-0.0274674
95012	c1cc(c(cc1O)O)C=O	beta-Resorcylaldehyde	4.02	0	-0.1108	0.0122766	39.2406	0	0	6	0	3	0	0	0	0	0	0	0	1783.85	0	104.189	78.3882	58.5618	30.7946	57.2468	8.57153	0	140.269	95.7796	95.0617	56.5487	8.32185	8.12417	8.25957	8.1505	8.67549	8.09482	159.589	145.653	153.05	164.781	0.50869	-0.240485	0.0065177	-0.132221	0.270596	-0.280396	0.162554
24544045	c1(c(c(C(C)C)ccc1)N)C(C)C	Diisopropylaniline	4.03	0	0.9613	0.924098	60.601	0	0	6	1	0	0	0	0	0	0	0	0	1946.67	36.5783	66.6708	45.6907	35.4736	21.7555	13.0668	6.56158	1.01606	144.506	117.827	86.2347	72.9102	7.13558	7.21855	7.22437	7.22909	6.92706	6.91805	163.944	146.361	154.388	160.202	0.16937	-0.0948157	0.0293794	0.0274802	-0.00196353	-0.136985	0.0779234
100527	c1ccc(cc1)C=O	Benzaldehyde	4.03	0	1.0154	1.03104	36.0296	0	0	6	0	1	0	0	0	0	0	0	0	1271.91	0	91.0468	51.1685	33.7953	28.0774	8.57153	0	0	120.607	91.1739	56.5487	0	7.60329	7.37164	7.546	7.78726	8.09482	0	155.894	139.974	152.962	164.573	0.159293	-0.0314769	-0.0673239	0.0142511	0.0111455	0.00543195	-0.0116741
105533	C(CC(OCC)=O)(OCC)=O	Diethyl malonate	4.04	0	0.558	0.311364	37.1136	0	0	0	0	4	0	0	0	0	0	0	0	2045.91	269.399	85.2421	50.411	79.2594	39.1639	36.3475	29.4711	17.96	182.123	129.559	108.128	127.23	8.12226	8.30135	8.61315	7.807	7.96041	8.73364	167.321	148.396	171.283	158.576	0.531601	-0.271434	0.148955	-0.432689	0.39676	-0.0316402	-0.0255791
96093	c1([C@@H]2CO2)ccccc1	Styrene-7,8-oxide	4.05	0	1.0149	1.03002	39.4649	0	0	6	0	1	0	0	0	0	0	0	0	1418.21	0	90.8499	51.4189	37.0385	23.6834	6.39206	1.01606	0	140.985	102.842	64.6269	31.0837	7.4955	7.32401	7.45382	7.36028	7.15738	6.71846	157.597	141.446	153.346	159.421	0.201474	-0.0469169	-0.0713062	0.0230172	-0.00729725	0.000768	-0.00636781
141286	C(CCCCC(OCC)=O)(OCC)=O	Diethyl adipate	4.05	0	0.0168	0.000282	47.486	0	0	0	0	4	0	0	0	0	0	0	0	2484.8	1247	76.7987	38.9061	46.0477	34.9878	31.7218	39.9821	31.1751	150.269	129.367	115.704	114.056	7.80451	7.77177	7.95252	7.8534	7.56581	7.52295	166.821	147.22	168.48	162.057	0.517867	-0.319888	0.130229	-0.0383993	0.0556539	-0.0192811	-0.374535
95578	c1(c(cccc1)Cl)O	2-Chlorophenol	4.05	0	1.209	1.46168	37.2775	0	0	6	0	1	0	0	0	1	0	0	1	2383.34	0	119.084	104.863	52.0687	11.1693	1.01606	0	0	130.369	69.1938	31.0837	0	8.02021	8.01225	8.02508	7.62523	6.71846	0	156.843	142.908	156.661	167.015	0.237215	-0.126455	-0.0335188	0.0897725	-0.0503637	-0.0115695	0.0135269
123079	c1(ccc(cc1)O)CC	4-Ethylphenol	4.07	0	0.9516	0.905543	41.6917	0	0	6	0	1	0	0	0	0	0	0	0	1420.24	3.04819	77.4404	43.8051	26.6906	17.9197	21.4571	10.42	1.01606	125.903	89.7601	85.5543	70.4908	7.41371	7.38885	7.28524	7.03433	7.51981	8.16134	160.473	143.736	156.665	160.173	0.217556	-0.114007	0.0297892	-0.02098	-0.0412468	0.0403867	0.00702557
513815	C(C(C)=C)(C)=C	2,3-Dimethyl-1,3-butadiene	4.08	0	2.3078	5.32594	28.8584	0	0	0	0	0	0	0	0	0	0	0	0	875.745	0	56.1594	34.1333	7.94795	1.01606	0	0	0	83.3668	31.0837	0	0	7.02673	7.18811	6.96794	6.71846	0	0	163.121	144.346	148.735	165.046	0.0437172	-0.00920084	0.0119568	-0.027176	-0.0338154	0.0363768	0
120809	c1(c(cccc1)O)O	Catechol	4.08	0	0.2772	0.0768398	34.1668	0	0	6	0	2	0	0	0	0	0	0	0	1383.62	0	95.0425	65.5201	29.1005	6.25645	1.01606	0	0	106.988	58.0003	31.0837	0	8.01838	8.02472	8.03548	7.34884	6.71846	0	160.084	146.451	157.672	169.122	0.396495	-0.228477	-0.0275004	0.191797	-0.197815	0.0366802	0.0270675
106423	c1(ccc(C)cc1)C	4-Xylene	4.08	0	2.2962	5.27253	39.5198	0	0	6	0	0	0	0	0	0	0	0	0	1164.27	0	70.8435	39.4682	15.136	11.0063	12.1071	1.01606	0	99.3594	73.6719	114.737	31.0837	7.08382	7.18314	6.98589	6.87166	7.11763	6.71846	159.085	141.421	149.465	164.025	0.041982	0.00153981	-0.00283509	-0.0300041	-0.0115437	0.0215321	-0.00661226
97029	c1(cc(ccc1N)[N+](=O)[O-])[N+](=O)[O-]	2,4-Dinitroaniline	4.08	0	0.6333	0.401069	40.941	0	0	6	3	4	0	0	0	0	0	0	0	2483.13	0	129.514	101.645	82.1026	81.3469	153.256	16.127	0	166.594	140.001	166.244	82.0136	9.04707	8.38572	8.7946	9.15586	11.2249	9.47117	170.049	161.005	160.819	173.566	0.246846	-0.103059	-0.0108219	0.0436564	-0.0563121	-0.0719603	0.138009
102089	c1(NC(Nc2ccccc2)=S)ccccc1	N,N'-Diphenylthiourea	4.08	0	2.1846	4.77248	78.5005	0	0	12	2	0	1	0	0	0	0	0	0	3307.86	1378.14	101.328	63.2804	68.9013	81.4764	71.4901	53.4086	43.0668	175.025	197.589	201.727	200.38	7.42126	7.48004	7.41567	7.57288	7.48239	7.30665	157.041	145.494	156.984	160.375	0.238149	-0.145398	0.120257	-0.138636	0.0520484	-0.0140504	0.00702687
119619	c1(C(c2ccccc2)=O)ccccc1	Benzophenone	4.09	0	2.1518	4.63024	64.8174	0	0	12	0	1	0	0	0	0	0	0	0	2141.56	249.249	93.3173	61.741	56.8605	60.7365	44.0112	27.8178	14.6617	183.82	202.921	179.43	134.947	7.44013	7.40547	7.62024	7.64348	7.32055	7.064	153.456	138.388	150.856	155.855	0.192886	-0.0593988	-0.0848414	0.0452403	0.0386905	0.00595266	-0.0455617
645567	c1(ccc(cc1)O)CCC	4-Propylphenol	4.09	0	0.4704	0.221276	45.0169	0	0	6	0	1	0	0	0	0	0	0	0	1566.54	62.5202	74.5385	39.6032	28.2375	25.5445	20.4808	18.7317	10.42	126.255	118.085	98.5286	78.2915	7.35627	7.31194	7.21413	7.0993	7.27981	7.41296	161.164	143.819	158.133	161.909	0.221964	-0.11403	0.0256984	-0.0213365	-0.0299458	0.0286968	-0.00816198
109217	O(C(CCC)=O)CCCC	n-Butyl n-butyrate	4.1	0	-0.8061	0.649797	36.0853	0	0	0	0	2	0	0	0	0	0	0	0	1682.31	281.592	65.4316	30.0855	33.6938	29.9402	28.6351	15.7768	10.4293	116.472	121.032	127.392	94.9867	7.48165	7.43723	7.68153	7.85388	7.30759	7.18788	167.075	146.83	168.319	168.392	0.274243	-0.163408	0.046194	-0.00507897	0.0229084	-0.0565751	0.0240134
14548459	C(c1cnccc1)(c1ccc(cc1)Br)=O	4-Bromophenyl 3-pyridyl ketone	4.11	0	1.0264	1.0535	68.8572	0	0	12	1	1	0	0	0	0	1	0	1	8576.11	2448.89	138.183	112.284	88.8104	97.7858	121.533	111.495	174.921	202.161	222.502	199.698	174.624	7.74562	7.67211	7.88627	7.76623	7.62727	7.37983	153.788	140.008	149.918	156.677	0.257373	-0.0796976	-0.0839915	0.0218561	0.0697086	-0.043136	-0.0151077
97881	C(=O)(OCCCC)C(=C)C	N-Butyl methacrylate	4.11	0	0.5497	0.30217	37.155	0	0	0	0	2	0	0	0	0	0	0	0	1680.27	143.339	70.0685	41.011	29.1641	34.9429	27.8957	18.2354	6.82565	110.615	140.86	121.815	102.991	7.54525	7.50643	7.87512	7.59972	7.28098	7.26262	165.588	146.283	162.505	172.072	0.288394	-0.192255	0.0317002	0.125261	-0.117461	-0.0178166	0.0387919
21725462	CCNc1nc(nc(n1)Cl)NC(C)(C)C#N	Cyanazine	4.12	0	0.1652	0.027291	59.0925	0	0	6	6	0	0	0	0	1	0	0	1	3745.46	805.9	103.961	71.5514	73.7774	79.5807	92.8787	50.3909	27.7897	153.629	197.848	200.134	142.221	7.87897	7.84674	7.82836	8.26169	7.94329	8.28313	171.748	156.313	168.524	174.957	0.533357	-0.500613	0.516034	-0.448799	0.302142	-0.135303	-0.0371102
315184	Cc1cc(cc(c1N(C)C)C)OC(=O)NC	Mexacarbate	4.12	0	1.6387	2.68534	66.9561	0	0	6	2	2	0	0	0	0	0	0	0	2653.79	1163.51	82.1098	65.7863	50.152	34.8929	23.0071	38.3728	35.2578	165.66	148.655	83.565	132.886	7.60368	7.69796	7.64214	7.58433	7.07777	8.18179	165.983	149.806	152.093	162.028	0.441354	-0.325134	0.210601	-0.0531251	-0.0673301	-0.0714772	0.103502
35572782	c1(cc(cc(c1C)N)[N+](=O)[O-])[N+](=O)[O-]	2-Amino-4,6-dinitrotoluene	4.12	0	1.0797	1.16575	45.223	0	0	6	3	4	0	0	0	0	0	0	0	2629.42	0	119.035	98.2183	73.6968	71.0448	76.8504	16.127	0	168.473	126.861	124.487	82.0136	8.75355	8.22825	8.44446	8.69007	9.83142	9.47117	169.405	158.625	156.52	168.471	0.240355	-0.100995	0.0362246	-0.0520264	-0.0938013	0.159597	-0.0478965
120616	c1(C(OC)=O)ccc(C(OC)=O)cc1	Dimethyl terephthalate	4.13	0	1.0346	1.0704	52.4924	0	0	6	0	4	0	0	0	0	0	0	0	2476.67	841.298	101.174	88.2045	63.641	51.8497	37.1497	58.2181	84.1298	176.809	168.073	125.492	115.584	8.16653	7.94251	8.43623	8.02647	7.34471	7.9923	160.789	144.402	148.734	161.219	0.556132	-0.340253	-0.00788129	0.216479	-0.0141397	-0.132734	-0.311678
99887	c1(C(C)C)ccc(N)cc1	Cumidine	4.13	0	0.584	0.341056	47.5533	0	0	6	1	0	0	0	0	0	0	0	0	1507.78	12.1928	70.784	41.0249	24.039	16.8362	19.9846	11.2646	1.01606	119.879	94.517	87.8211	86.9093	7.19158	7.245	7.1045	6.98705	7.10361	7.63171	163.318	147.149	155.725	162.716	0.162597	-0.0879681	0.0418995	-0.0314873	-0.0428486	0.0279146	0.0394302
83410	c1(c(c(ccc1)C)C)[N+](=O)[O-]	1,2-Dimethyl-3-nitrobenzene	4.14	0	2.5095	6.29759	42.7375	0	0	6	1	2	0	0	0	0	0	0	0	1871.39	0	93.9755	72.2613	49.1217	25.4594	9.65088	0	0	152.167	87.9117	60.1865	0	7.88477	7.66818	7.78592	7.78318	8.29144	0	163.038	147.598	151.23	160.83	0.0819096	-0.0177788	-0.0353718	0.00814964	0.0239292	0.00650282	-0.0263859
93890	CCOC(=O)c1ccccc1	Ethyl benzoate	4.14	0	1.4694	2.15914	46.0179	0	0	6	0	2	0	0	0	0	0	0	0	1820.47	56.5569	88.175	56.3772	57.548	47.8951	27.7656	13.0729	4.71307	167.773	163.326	137.619	90.7481	7.70251	7.6461	8.04658	8.04565	7.30803	6.95541	160.058	143.124	159.044	160.069	0.301642	-0.178689	0.00692403	0.0482393	0.0226271	-0.0326398	-0.0392988
94826	c1(c(cc(cc1)Cl)Cl)OCCCC(=O)O	2,4-DB	4.14	1	1.0585	1.12042	60.7273	0	0	6	0	3	0	0	0	2	0	0	2	4734.11	2653.47	121.748	89.7685	102.071	75.4657	66.9801	80.1079	120.612	182.187	173.094	173.322	180.689	8.27185	8.1508	8.18333	8.12033	7.59447	7.90889	160.392	144.394	161.28	162.157	0.504515	-0.289414	0.106123	-0.0282563	-0.191927	0.244761	-0.0829872
275514	c12c(ccc1)ccccc2	Azulene	4.15	0	1.9478	3.79392	49.1528	0	0	10	0	0	0	0	0	0	0	0	0	1450.77	0	88.6191	54.4531	33.4717	13.577	3.78882	1.01606	0	154.465	94.5505	51.997	31.0837	7.17516	7.19718	7.12182	6.97356	6.81826	6.71846	152.627	137.88	149.238	154.087	0.0581043	-0.00369625	-0.0207981	0.00494097	-0.0236009	-0.00519934	0.0154852
104132	c1(ccc(N)cc1)CCCC	Benzenamine, 4-butyl-	4.17	0	-0.4512	0.203581	49.8728	0	0	6	1	0	0	0	0	0	0	0	0	1654.08	267.172	69.0965	35.0078	25.1656	25.3314	26.7289	16.675	14.8429	120.636	116.45	127.482	91.0157	7.16861	7.17018	7.09137	7.02395	7.18172	7.07797	163.575	146.826	159.707	163.435	0.167995	-0.0848896	0.0297573	-0.0332633	-0.0265812	0.0398068	-0.0196267
2905693	c1(c(ccc(c1)Cl)Cl)C(OC)=O	Methyl 2,5-dichlorobenzoate	4.17	0	1.9564	3.8275	51.1565	0	0	6	0	2	0	0	0	2	0	0	2	4185.55	3.04819	139.476	139.488	138.812	190.516	46.9004	15.8677	1.01606	219.561	220.628	136.555	92.7681	8.41609	8.26802	8.84638	8.67179	7.82504	7.56475	157.282	142.131	150.091	160.597	0.331769	-0.183003	0.0441182	-0.00294495	-0.082746	0.10734	-0.0456151
83341	Cc1c[nH]c2c1cccc2	3-Methylindole	4.17	0	0.7338	0.538462	46.2057	0	0	9	1	0	0	0	0	0	0	0	0	1503.72	0	87.2915	54.619	32.6592	12.5577	4.42869	1.01606	0	144.721	91.0636	56.8231	31.0837	7.29118	7.33684	7.31165	7.01368	6.84128	6.71846	158.771	144.554	152.237	161.021	0.126262	-0.0461766	-0.0155734	0.0258298	-0.0507461	-0.00213926	0.0205193
555168	c1(ccc(C=O)cc1)[N+](=O)[O-]	4-Nitrobenzaldehyde	4.18	0	1.2287	1.5097	39.2473	0	0	6	1	3	0	0	0	0	0	0	0	1979.03	0	117.436	82.2874	60.4074	57.1776	155.636	136.047	0	152.47	130.69	230.471	149.202	8.53954	7.96047	8.34693	8.64606	10.0044	11.4114	161.234	147.877	154.619	167.198	0.197486	-0.0494255	-0.0715818	0.0660879	0.0241688	-0.0671492	-0.0485564
6393426	c1(c(c(cc(c1)C)[N+](=O)[O-])N)[N+](=O)[O-]	2,6-Dinitro-4-methylaniline	4.18	0	1.0797	1.16575	45.223	0	0	6	3	4	0	0	0	0	0	0	0	2629.42	0	119.035	99.5488	81.6036	76.5397	53.939	1.01606	0	167.83	150.277	106.726	31.0837	8.75355	8.24208	8.51144	8.9523	9.76069	6.71846	169.405	158.625	156.677	171.526	0.255169	-0.0972566	-0.0720505	0.0229514	0.10953	-0.0657622	-0.0457661
22104627	O=C([C@@H](C)CN(C)C)C	4-Dimethylamino-3-methyl-2-butanone	4.18	0	0.2703	0.0730621	39.1281	0	0	0	1	1	0	0	0	0	0	0	0	1477.25	0	63.2844	36.3496	21.4746	20.7495	7.23156	1.01606	0	95.6827	96.335	67.4563	31.0837	7.37975	7.522	7.295	7.15631	7.3103	6.71846	169.084	149.928	158.288	172.134	0.225803	-0.0380911	-0.0856037	-0.040731	0.066817	0.0203473	-0.0575199
760236	C([C@@H](CCl)Cl)=C	3,4-Dichloro-1-butene	4.18	0	2.1573	4.65394	29.4885	0	0	0	0	0	0	0	0	2	0	0	2	3096.56	0	123.365	130.169	48.7903	12.5886	0	0	0	118.397	62.4429	0	0	7.88534	7.94883	7.65903	7.48138	0	0	162.75	144.651	165.035	168.933	0.1037	-0.022144	-0.0513835	0.0290706	-0.000339	-0.00705388	0
149304	c1ccc2c(c1)nc(s2)S	Mercaptobenzothiazole	4.19	0	2.1645	4.68506	52.296	0	0	9	1	0	2	0	0	0	0	0	0	3266.81	0	152.376	107.341	90.1872	84.6053	15.1465	1.01606	0	205.132	181.006	94.0063	31.0837	7.60435	7.56565	7.52381	7.5183	7.16688	6.71846	149.203	136.964	149.411	151.954	0.135225	-0.0936487	0.0557911	-0.0366443	0.0144136	-0.00735205	-0.0136553
95501	c1(c(cccc1)Cl)Cl	ortho-Dichlorobenzene	4.19	0	2.1408	4.58302	40.3882	0	0	6	0	0	0	0	0	2	0	0	2	3383.05	0	147.133	169.716	87.0812	24.1611	0	0	0	162.146	93.802	0	0	8.02235	7.99892	8.08508	8.24429	0	0	153.063	138.775	155.478	164.977	0.0769824	-0.0263527	-0.037083	0.038085	-0.0014082	-0.0117322	0
1126461	c1(ccc(Cl)cc1)C(OC)=O	Methyl 4-chlorobenzoate	4.19	0	1.5877	2.52079	46.4403	0	0	6	0	2	0	0	0	1	0	0	1	2929.86	107.201	116.493	96.9625	68.6639	66.4233	81.2674	46.8208	35.7336	173.667	169.611	128.728	99.2708	8.11847	7.94926	8.36099	8.0502	7.6581	7.1206	158.213	142.526	151.088	162.024	0.311016	-0.188191	0.0064386	0.121576	-0.0350747	-0.158215	0.0926803
95636	c1(c(ccc(c1)C)C)C	1,2,4-Trimethylbenzene	4.19	0	2.7426	7.52185	43.8018	0	0	6	0	0	0	0	0	0	0	0	0	1310.57	0	68.7458	45.7091	20.1164	9.23925	4.71307	1.01606	0	117.812	75.4653	58.968	31.0837	7.07077	7.21583	7.04476	6.9033	6.85152	6.71846	160.008	141.839	147.187	159.54	0.0401468	0.00193739	0.00499964	-0.0290101	-0.0214435	0.0110004	0.00550848
626437	c1(cc(cc(c1)Cl)Cl)N	3,5-Dichloroaniline	4.2	0	0.9441	0.891325	43.938	0	0	6	1	0	0	0	0	2	0	0	2	3580.27	0	139.283	110.587	168.074	28.0816	1.01606	0	0	173.503	118.601	31.0837	0	8.08488	8.08381	7.9491	8.50637	6.71846	0	159.494	147.937	156.946	168.354	0.181881	-0.108552	0.0706481	-0.163543	0.198926	-0.104826	0.0164067
90120	c12c(c(ccc1)C)cccc2	1-Methylnaphthalene	4.2	0	2.3942	5.73219	53.4348	0	0	10	0	0	0	0	0	0	0	0	0	1597.07	0	84.1927	55.9003	37.3747	19.5252	5.04916	1.01606	0	164.588	114.903	61.503	31.0837	7.14906	7.21644	7.14063	7.03325	6.86362	6.71846	154.472	138.762	147.76	152.796	0.056487	-0.00333659	-0.0157064	0.00224534	-0.0157093	-0.0208468	0.012314
2234164	c1(c(cc(Cl)cc1)Cl)C(C)=O	2',4'-Dichloroacetophenone	4.21	0	1.6913	2.8605	49.9385	0	0	6	0	1	0	0	0	2	0	0	2	3929.58	0	133.559	122.606	159.702	49.4442	94.1247	35.7336	0	224.479	137.864	120.267	125.161	8.12576	8.1901	8.29636	7.90013	7.62761	9.0072	155.625	139.91	152.421	155.005	0.180107	-0.0690261	0.0242003	-0.0703492	0.0761125	-0.0964964	0.0577657
937202	Clc1ccc(C(=O)CCl)cc1	2,4'-Dichloroacetophenone	4.21	0	1.8552	3.44177	49.9755	0	0	6	0	1	0	0	0	2	0	0	2	3929.58	0	133.559	112.573	90.2126	85.5361	138.045	442.723	0	196.744	161.976	168.942	251.431	8.12576	8.06391	7.96622	7.91308	8.26417	10.03	155.625	139.91	152.879	155.98	0.211862	-0.0586634	-0.0733534	0.0502669	0.0101442	-0.0544815	0.0139648
70343065	c1(c(c(ccc1C)[N+](=O)[O-])N)[N+](=O)[O-]	Benzenamine, 2,6-dinitro-3-methyl- (9CI)	4.21	0	1.0797	1.16575	45.223	0	0	6	3	4	0	0	0	0	0	0	0	2629.42	0	119.035	103.216	86.7777	51.909	78.4705	16.127	0	177.386	120.896	112.875	82.0136	8.75355	8.24446	8.63048	8.88365	9.00006	9.47117	169.405	158.625	156.621	171.04	0.256071	-0.098861	-0.0883091	0.0587013	0.15041	-0.227256	0.0985093
88697	c1(c(cccc1)O)C(C)C	2-Isopropylphenol	4.21	0	1.2176	1.48255	45.609	0	0	6	0	1	0	0	0	0	0	0	0	1566.54	0	74.5385	46.8685	33.92	15.9014	4.18493	1.01606	0	133.558	100.086	54.9846	31.0837	7.35627	7.35839	7.37752	7.41598	6.83251	6.71846	161.164	143.819	154.866	160.848	0.222049	-0.11872	0.015492	0.0125215	0.00683071	-0.0846815	0.0487391
123660	C(C(OCC)=O)CCCC	Ethyl caproate	4.21	0	-0.5163	0.266566	35.4649	0	0	0	0	2	0	0	0	0	0	0	0	1682.31	275.496	65.4316	29.3019	32.9436	27.094	24.9696	18.682	13.1188	124.328	112.406	101.52	99.3549	7.48165	7.43474	7.53926	7.54591	7.38724	7.52412	167.075	146.83	168.418	164.964	0.273574	-0.162254	0.0576243	-0.0263238	0.00247477	-0.011955	0.0327365
330541	CN(C)C(=O)Nc1ccc(c(c1)Cl)Cl	Diuron	4.22	0	1.2709	1.61519	61.0519	0	0	6	2	1	0	0	0	2	0	0	2	4470.3	1144.72	119.733	121.599	66.0853	78.8305	95.9519	74.5473	57.236	151.402	179.76	199.648	138.461	8.03981	8.07325	8.02463	7.88353	7.96233	7.44472	163.941	150.008	156.504	171.553	0.344668	-0.258622	0.166053	-0.0493075	-0.0131921	-0.0200031	-0.0857603
2416946	c1(c(c(ccc1C)C)O)C	2,3,6-Trimethylphenol	4.22	0	2.1795	4.75022	45.4073	0	0	6	0	1	0	0	0	0	0	0	0	1566.54	0	74.5385	61.6365	28.4597	9.41878	4.04089	1.01606	0	131.662	74.8734	53.8982	31.0837	7.35627	7.49555	7.53309	7.11467	6.82733	6.71846	161.164	143.819	147.498	159.09	0.211482	-0.114979	0.0177476	0.0555962	-0.0904314	-0.0183193	0.0376339
387451	O=Cc1c(cccc1F)Cl	2-Chloro-6-fluorobenzaldehyde	4.23	0	1.2939	1.67418	40.8736	0	0	6	0	1	0	0	1	1	0	0	2	2887.52	0	136.03	128.854	146.136	33.9498	8.57153	0	0	191.12	106.416	56.5487	0	8.64891	8.3641	9.23203	8.44707	8.09482	0	163.171	142.543	159.014	174.939	0.232218	-0.0505147	-0.0291705	-0.124518	0.125362	-0.0255851	-0.0116828
583788	c1(c(ccc(c1)Cl)Cl)O	2,5-Dichlorophenol	4.23	0	1.5777	2.48914	41.9937	0	0	6	0	1	0	0	0	2	0	0	2	3639.02	0	150.906	143.854	114.534	220.45	1.01606	0	0	173.467	148.008	31.0837	0	8.4323	8.42212	8.52133	8.51809	6.71846	0	155.554	142.362	155.297	165.498	0.250006	-0.136592	-9.04e-05	0.0294842	-0.00767143	-0.0241039	0.0139705
95498	Cc1ccccc1Cl	2-Chlorotoluene	4.23	0	2.2185	4.92174	39.954	0	0	6	0	0	0	0	0	1	0	0	1	2273.66	0	101.359	82.1881	37.462	7.6062	1.01606	0	0	126.816	66.8078	31.0837	0	7.45923	7.49099	7.54678	7.04225	6.71846	0	156.676	140.363	151.85	163.19	0.0548158	-0.0193135	-0.0107823	0.01804	-0.0196598	-0.000894	0.00520128
80433	c1(C(OOC(c2ccccc2)(C)C)(C)C)ccccc1	Dicumyl peroxide	4.24	0	4.4368	19.6852	87.0074	0	0	12	0	2	0	0	0	0	0	0	0	3131.04	2601.01	81.4746	56.1387	41.8474	41.1416	33.574	29.2784	30.9644	148.182	150.671	144.664	128.415	7.38664	7.75935	7.6299	7.42561	7.28244	7.05429	160.033	142.864	154.577	161.338	0.216794	-0.0364561	-0.0329018	0.0106293	-0.0464451	0.0120207	-0.0492763
32534955	CCCC(C)CCCOC(=O)C(C)Oc1cc(Cl)c(Cl)cc1Cl	Fenoprop-isoctyl	4.24	0	1.8432	3.39739	95.4374	0	0	6	0	3	0	0	0	3	0	0	3	7013.87	4646.77	101.752	82.0581	69.2116	66.501	55.2578	69.2039	65.4475	157.388	152.89	134.629	158.226	7.80425	7.8031	7.70316	7.57797	7.67986	7.81875	162.379	144.098	161.227	162.558	0.528874	-0.24271	-0.1154	0.219243	-0.151523	0.0335715	-0.0372748
3206313	N(C(=O)OCC)(C(=O)OCC)C(=O)OCC	Triethyl nitrilotricarboxylate	4.24	0	1.8287	3.34414	51.3499	0	0	0	1	6	0	0	0	0	0	0	0	3045.62	808.198	94.953	75.1119	117.974	74.7719	58.662	29.4711	17.96	201.234	188.99	156.788	127.23	8.35334	8.30223	9.6097	8.55857	8.7448	8.73364	168.996	151.61	168.249	169.161	0.878609	-0.679621	0.682182	-1.18595	1.0353	-0.0899158	-0.0673583
56348404	CSCCCCCCSC	2,9-Dithiadecane	4.25	0	0.257	0.066049	48.0512	0	0	0	0	0	2	0	0	0	0	0	0	3228.09	903.409	91.8348	34.3129	29.5212	30.8729	32.8038	47.9687	37.642	110.648	110.433	110.126	110.1	7.09801	7.08822	7.02942	7.03686	7.0475	7.0653	162.769	142.845	159.831	164.173	0.0830352	0.00103693	-0.0492773	-0.00281581	0.0071175	0.00113682	-0.00871936
4253898	S(SC(C)C)C(C)C	Diisopropyl disulfide	4.26	0	1.2856	1.65277	45.9776	0	0	0	0	0	2	0	0	0	0	0	0	2935.5	0	121.169	53.3596	27.9822	36.7517	8.41008	1.01606	0	114.373	169.568	86.8523	31.0837	7.12679	7.28737	7.14734	7.17917	6.98458	6.71846	162.012	142.454	154.005	162.014	0.0381768	-0.0100436	0.0163291	-0.0177457	-0.0169635	0.00685768	-0.018454
10202923	c1(c(c([N+]([O-])=O)ccc1N)C)[N+]([O-])=O	m-Toluidine, 2,4-dinitro-	4.26	0	1.0797	1.16575	45.223	0	0	6	3	4	0	0	0	0	0	0	0	2629.42	0	119.035	102.551	85.7201	50.9173	81.1424	16.127	0	181.603	118.12	102.221	82.0136	8.75355	8.23754	8.59478	8.91506	9.09025	9.47117	169.405	158.625	156.542	169.448	0.247776	-0.103086	-0.0357306	0.0468864	0.0358428	-0.169154	0.164285
94815	c1(c(cc(Cl)cc1)C)OCCCC(O)=O	MCPB	4.26	1	1.1362	1.29095	60.2931	0	0	6	0	3	0	0	0	1	0	0	1	3624.72	1945.88	99.9464	65.1539	56.2821	53.0677	42.8229	53.5992	62.7704	158.771	152.475	139.65	150.299	7.94345	7.89639	7.9042	7.803	7.25901	7.50633	161.542	144.643	158.972	162.145	0.479249	-0.283889	0.145423	-0.0390533	-0.237315	0.235053	-0.092644
541731	c1c(cccc1Cl)Cl	1,3-Dichlorobenzene	4.26	0	2.1408	4.58302	40.3882	0	0	6	0	0	0	0	0	2	0	0	2	3383.05	0	147.133	113.227	185.936	24.1611	0	0	0	185.874	93.802	0	0	8.02235	7.9618	8.15005	8.24429	0	0	153.063	138.775	155.459	165.01	0.06781	-0.0316796	0.0194247	-0.0370148	0.0279543	-0.0125896	0
110827	C1CCCCC1	Cyclohexane	4.27	0	-1.728	2.98598	17.4696	0	0	0	0	0	0	0	0	0	0	0	0	877.777	0	56.1594	14.6617	4.71307	1.01606	0	0	0	58.968	31.0837	0	0	6.99248	6.95466	6.85152	6.71846	0	0	165.543	144.346	166.536	174.319	0.0250881	2.17e-18	-0.0125441	-0.00836271	-3.25e-18	0.00836271	0
3923522	c1ccccc1C(C#C)(O)c1ccccc1	Diphenylethynylcarbinol	4.27	0	2.4353	5.93069	72.1032	0	0	12	0	1	0	0	0	0	0	0	0	2432.12	251.281	91.3688	68.7415	59.4575	51.302	34.2648	21.9322	13.2253	200.318	187.404	152.117	116.42	7.39575	7.44297	7.55281	7.4196	7.19441	7.01508	153.799	139.71	148.678	152.211	0.318577	-0.169522	-0.039403	0.13271	-0.0566524	-0.0167654	-0.0545131
98828	c1(ccccc1)C(C)C	Cumene	4.28	0	1.7807	3.17089	44.0035	0	0	6	0	0	0	0	0	0	0	0	0	1310.57	0	68.7458	36.0738	23.0942	14.5198	5.24122	1.01606	0	121.161	94.712	62.9515	31.0837	7.07077	7.1135	7.03156	6.96372	6.87053	6.71846	160.008	141.839	154.922	160.796	0.0511743	-0.00419197	-0.00979743	-0.0101075	-0.0151839	0.0013629	0.00360613
86577	c12c(cccc1[N+](=O)[O-])cccc2	1-Nitronaphthalene	4.28	0	2.1611	4.67035	52.3705	0	0	10	1	2	0	0	0	0	0	0	0	2157.89	0	108.957	76.8943	69.8415	57.9648	30.4843	8.57153	0	193.333	155.965	99.9373	56.5487	7.96697	7.6144	7.87831	8.0832	8.1798	8.09482	157.225	144.1	151.219	157.005	0.101743	-0.0163633	-0.0519032	0.00200277	0.0262138	0.0191086	-0.0220594
59507	c1(c(ccc(c1)O)Cl)C	Chlorocresol	4.29	0	1.6554	2.74035	41.5595	0	0	6	0	1	0	0	0	1	0	0	1	2529.63	0	107.286	90.8148	46.4485	46.2179	5.97571	0	0	134.362	94.6742	44.5234	0	7.82751	7.8562	7.76358	7.82728	7.04543	0	158.475	143.178	151.972	164.049	0.224874	-0.129426	0.0440942	-0.0136375	-0.0523204	0.0435204	-0.00466708
51285	c1(cc(ccc1O)[N+](=O)[O-])[N+](=O)[O-]	2,4-Dinitrophenol	4.29	0	1.2669	1.60504	38.9967	0	0	6	2	5	0	0	0	0	0	0	0	2541.88	0	137.827	109.93	94.0008	100.759	175.798	16.127	0	174.861	157.262	172.149	82.0136	9.36934	8.63488	9.19945	9.54344	11.9257	9.47117	167.657	157.511	159.819	171.856	0.313071	-0.119766	-0.0202849	0.0418932	-0.0627559	-0.0912509	0.150848
2691410	N1(CN(CN([N+](=O)[O-])CN(C1)[N+](=O)[O-])[N+](=O)[O-])[N+](=O)[O-]	Cyclotetramethylenetetranitramine	4.3	0	0.6172	0.380936	42.4956	0	0	0	8	8	0	0	0	0	0	0	0	4202.5	2047.74	143.583	100.152	74.5354	129.462	103.104	224.098	255.968	136.037	196.627	131.177	229.458	9.72631	8.72914	9.12734	9.62476	10.367	11.6709	184.287	177.236	172.889	187.958	0.2804	-0.193084	0.242498	-0.167824	0.112837	-0.272501	0.134649
122349	c1(nc(nc(n1)Cl)NCC)NCC	Simazine	4.31	0	-0.1109	0.0122988	49.1164	0	0	6	5	0	0	0	0	1	0	0	1	3259.72	275.496	101.84	68.528	93.9042	69.3283	61.6235	24.9688	13.1188	178.636	179.494	160.745	115.145	7.85956	7.73688	8.0754	8.10407	7.95097	7.935	173.237	158.508	174.462	173.232	0.443888	-0.45022	0.506827	-0.4982	0.366376	-0.159789	0.0502302
121824	N1(CN(CN(C1)[N+](=O)[O-])[N+](=O)[O-])[N+](=O)[O-]	Cyclonite	4.31	0	0.4629	0.214276	31.8717	0	0	0	6	6	0	0	0	0	0	0	0	3151.87	0	143.583	95.6127	71.1072	163.62	136.047	0	0	121.827	212.153	149.202	0	9.72631	8.72636	9.24284	10.4136	11.4114	0	184.287	177.236	173.504	189.151	0.2103	-0.144813	0.181874	-0.0896554	0.0583213	-0.177655	0.0667777
141275	C(\CC\C=C(/C)C)(=C\C=O)C	Geranial	4.32	0	2.4893	6.19661	50.2393	0	0	0	0	1	0	0	0	0	0	0	0	1714.87	505.57	64.779	34.9247	25.2713	22.7192	29.1924	28.9263	14.8697	112.961	105.227	118.965	141.243	7.2686	7.23251	7.07377	7.24162	7.18481	7.33749	163.41	144.017	153.99	164.572	0.16603	-0.0272377	-0.043779	-0.0449479	0.0499707	-0.0206225	0.00251836
91203	c12c(cccc1)cccc2	Naphthalene	4.32	0	1.9478	3.79392	49.1528	0	0	10	0	0	0	0	0	0	0	0	0	1450.77	0	88.6191	52.0897	34.807	20.0883	5.45247	1.01606	0	156.948	112.388	64.5449	31.0837	7.17516	7.18815	7.12208	7.01092	6.87813	6.71846	152.627	137.88	149.829	154.148	0.0581031	-0.0037055	-0.0208863	0.0013478	-0.0160932	-0.00527493	0.00792795
585342	c1(cc(ccc1)O)C(C)(C)C	Phenol, 3-(1,1-dimethylethyl)-	4.32	0	2.2009	4.84396	50.468	0	0	6	0	1	0	0	0	0	0	0	0	1712.83	0	72.333	44.2446	24.906	26.202	9.90911	1.01606	0	112.378	110.512	81.4709	31.0837	7.31261	7.37465	7.09534	7.20366	7.62322	6.71846	161.69	143.883	150.239	164.981	0.223682	-0.120653	0.0478348	-0.0506177	-0.0086943	0.0644877	-0.104865
106489	c1(ccc(Cl)cc1)O	Parachlorophenol	4.32	0	1.209	1.46168	37.2775	0	0	6	0	1	0	0	0	1	0	0	1	2383.34	0	119.084	82.4141	49.8989	97.2226	35.7336	0	0	124.489	94.8843	125.161	0	8.02021	7.97148	7.88204	7.78152	9.0072	0	156.843	142.908	156.662	167.551	0.225636	-0.129579	0.049462	-0.017696	-0.0856954	0.0990907	-0.0284001
2626837	CNC(=O)Oc1ccc(C(C)(C)C)cc1	Carbamic acid, methyl-, p-tert-butylphenyl ester	4.32	0	2.3355	5.45456	62.6797	0	0	6	1	2	0	0	0	0	0	0	0	2456.57	1388.96	80.1076	52.3289	34.2779	33.8589	32.9517	37.4904	53.4215	130.932	130.421	116.512	135.538	7.55016	7.54631	7.39453	7.32427	7.38494	7.87542	163.977	146.965	152.484	164.146	0.374132	-0.326675	0.263055	-0.0888151	-0.0607271	0.010887	0.0418075
120832	c1(c(ccc(c1)Cl)O)Cl	2,4-Dichlorophenol	4.32	0	1.5777	2.48914	41.9937	0	0	6	0	1	0	0	0	2	0	0	2	3639.02	0	150.906	143.854	156.404	103.009	35.7336	0	0	181.628	110.564	125.161	0	8.4323	8.42212	8.51145	8.16298	9.0072	0	155.554	142.362	155.297	165.524	0.249733	-0.136451	0.0061347	0.0430166	-0.0966594	0.0874894	-0.0283967
610413	c1(c([N+]([O-])=O)ccc(c1)N)[N+]([O-])=O	3,4-Dinitroaniline	4.33	0	0.6333	0.401069	40.941	0	0	6	3	4	0	0	0	0	0	0	0	2483.13	0	129.514	101.645	92.9286	104.132	57.3196	16.127	0	171.681	154.177	112.493	82.0136	9.04707	8.38572	8.83012	9.7256	9.67265	9.47117	170.049	161.005	160.819	173.567	0.258372	-0.0767796	0.0113065	-0.126676	-0.0444897	0.158201	0.0121161
95761	c1(c(ccc(c1)N)Cl)Cl	3,4-Dichloroaniline	4.33	0	0.9441	0.891325	43.938	0	0	6	1	0	0	0	0	2	0	0	2	3580.27	0	139.283	158.037	86.3758	70.1124	35.7336	0	0	150.81	116.487	125.161	0	8.08488	8.115	7.88354	8.05682	9.0072	0	159.494	147.937	156.962	168.364	0.190294	-0.105382	0.0207216	-0.0458397	0.0240858	0.0431064	-0.0318388
106434	c1(ccc(Cl)cc1)C	4-Chlorotoluene	4.33	0	2.2185	4.92174	39.954	0	0	6	0	0	0	0	0	1	0	0	1	2273.66	0	101.359	68.1523	33.1223	39.1866	35.7336	0	0	115.056	87.9063	125.161	0	7.45923	7.48595	7.26069	7.05358	9.0072	0	156.676	140.363	151.796	164.263	0.0540045	-0.017991	0.00340292	-0.0141387	-0.0173262	0.0299504	-0.0108997
1484260	c1c(cccc1)COc1cc(N)ccc1	3-Benzyloxyaniline	4.34	0	0.8252	0.680955	69.9003	0	0	12	1	1	0	0	0	0	0	0	0	2340.81	1165.79	89.2902	54.7691	42.1267	44.0055	51.5293	45.2284	36.4311	144.481	157.792	189.845	168.586	7.46143	7.5432	7.47745	7.48388	7.34438	7.18862	158.891	144.769	154.461	161.861	0.319073	-0.135605	-0.00216911	-0.0700339	0.136038	-0.12308	-0.00709713
1689845	c1(cc(c(O)c(c1)Br)Br)C#N	Bromoxynil	4.34	0	1.5848	2.51159	52.6082	0	0	6	1	1	0	0	0	0	2	0	2	14234.4	0	237.86	323.83	558.374	308.229	118.103	14.1191	0	268.931	213.753	172.097	86.9662	8.37259	8.31288	8.41058	8.51216	9.39425	8.27885	151.295	140.146	146.725	158.174	0.32387	-0.153497	-0.0433781	0.151431	-0.181783	-0.00361715	0.124751
95512	c1(c(cccc1)Cl)N	2-Chloroaniline	4.35	0	0.5754	0.331085	39.2218	0	0	6	1	0	0	0	0	1	0	0	1	2324.58	0	109.734	92.6233	43.3061	8.79413	1.01606	0	0	124.991	66.3355	31.0837	0	7.70222	7.72799	7.73572	7.23485	6.71846	0	160.691	148.444	158.177	168.748	0.173592	-0.103101	-0.00990131	0.0743836	-0.0574497	-0.00614426	0.0154169
122032	CC(C)c1ccc(cc1)C=O	Cuminaldehyde	4.35	0	1.3927	1.93961	49.0773	0	0	6	0	1	0	0	0	0	0	0	0	1710.8	102.858	77.3952	47.3135	30.8756	21.2721	25.6409	41.5273	8.57153	131.877	103.859	106.116	136.371	7.36428	7.26643	7.25139	7.15827	7.07294	7.76654	159.67	141.685	152.412	160.359	0.164716	-0.0354783	-0.0532913	0.0156145	-0.0120727	-0.0188226	0.0115501
108872	CC1CCCCC1	Methylcyclohexane	4.36	0	-0.2194	0.0481364	26.1737	0	0	0	0	0	0	0	0	0	0	0	0	1024.07	0	56.1594	18.8686	7.98198	3.06996	1.01606	0	0	70.8827	46.575	31.0837	0	6.99248	6.99986	6.88892	6.79238	6.71846	0	165.543	144.346	163.117	171.477	0.0286339	-0.00140735	-0.00797372	-0.0126045	-0.00357337	0.00757322	0.00366883
88302	c1(c(ccc(c1)O)[N+](=O)[O-])C(F)(F)F	4-Nitro-3-trifluoromethylphenol	4.36	0	1.9561	3.82633	40.9935	0	0	6	1	3	0	0	3	0	0	0	3	3060.83	0	141.97	118.319	117.418	155.145	71.2175	16.127	0	190.449	162.036	107.205	82.0136	9.88413	8.73092	9.43752	11.1116	10.7989	9.47117	183.638	157.418	162.217	183.03	0.517562	-0.283576	0.122794	-0.0459719	-0.343067	0.383184	-0.0369566
110167	C(=O)(/C=C\C(=O)O)O	Maleic acid	4.37	2	-0.2252	0.050715	24.607	0	0	0	0	4	0	0	0	0	0	0	0	1604.99	0	114.356	66.1954	71.6175	131.265	16.127	1.01606	0	152.551	144.65	82.0136	31.0837	9.20357	8.73075	8.8077	10.1349	9.47117	6.71846	165.721	151.852	165.543	169.183	0.619896	-0.467673	0.327852	-0.0838161	-0.377286	0.502581	-0.260515
1929824	c1(nc(ccc1)Cl)C(Cl)(Cl)Cl	Nitrapyrin	4.37	0	2.5906	6.71121	53.1637	0	0	6	1	0	0	0	0	4	0	0	4	6091.64	0	199.806	195.236	208.054	472.956	35.7336	0	0	282.355	319.389	125.161	0	8.85019	8.45791	8.68102	9.81821	9.0072	0	157.1	143.195	159.714	157.902	0.251254	-0.157741	-0.032997	0.122801	-0.0708503	0.0346429	-0.0214823
5372816	O=C(OC)c1ccc(c(N)c1)C(=O)OC	Dimethyl aminoterephthalate	4.37	0	-0.1621	0.0262764	56.0422	0	0	6	1	4	0	0	0	0	0	0	0	2673.89	847.395	100.482	92.3233	69.5421	55.8863	36.8877	45.8392	52.9622	178.721	161.973	125.247	104.926	8.18911	8.01739	8.39621	8.18514	7.65741	7.84508	163.657	148.902	150.173	162.336	0.674088	-0.413388	0.025178	0.0735054	0.13754	-0.0209575	-0.487174
107200	C(C=O)Cl	Chloroacetaldehyde	4.37	0	0.3501	0.12257	16.4715	0	0	0	0	1	0	0	0	1	0	0	1	1804.25	0	133.09	106.197	0	0	0	0	0	0	0	0	0	8.66625	9.01402	0	0	0	0	165.993	147.587	182.19	0	0.166601	-0.0179139	-0.0750495	0.00966277	0	0	0
121755	CCOC(=O)CC(C(=O)OCC)SP(=S)(OC)OC	Malathion	4.37	0	1.9641	3.85769	77.2727	0	0	0	0	6	2	1	0	0	0	0	0	6012.82	2608.05	158.132	108.94	104.309	102.503	74.0915	55.9093	40.1238	203.536	186.403	150.332	138.487	8.0784	8.06985	8.45162	8.3904	7.72106	8.12822	163.65	145.665	157.441	153.484	0.815112	-0.459593	0.230883	-0.00677011	-0.737918	0.482313	0.496154
114261	c1(c(cccc1)OC(C)C)OC(=O)NC	Propoxur	4.38	0	0.4262	0.181646	60.9151	0	0	6	1	3	0	0	0	0	0	0	0	2566.25	605.3	87.8342	59.64	59.2809	66.6717	38.5364	25.9466	15.929	172.701	192.98	143.508	108.94	7.79931	7.99439	7.94318	7.92052	7.6927	7.42471	164.537	148.325	161.909	161.723	0.503909	-0.377358	0.194606	0.0368798	-0.226243	0.23143	-0.123515
834128	CCNc1nc(nc(n1)SC)NC(C)C	Ametryn	4.38	0	-0.2041	0.0416568	61.6751	0	0	6	5	0	1	0	0	0	0	0	0	3324.47	696.276	96.7238	61.8103	68.1296	65.3713	59.8782	28.0935	12.894	154.671	183.454	169.306	128.651	7.55721	7.67291	7.69859	7.95595	7.73752	7.55217	170.259	154.45	170.183	172.442	0.426	-0.433526	0.514295	-0.491272	0.376407	-0.186311	0.0413597
99650	c1cc(cc(c1)[N+](=O)[O-])[N+](=O)[O-]	1,3-Dinitrobenzene	4.38	0	1.83	3.3489	37.3912	0	0	6	2	4	0	0	0	0	0	0	0	2285.91	0	134.18	96.4973	81.3827	117.254	136.047	0	0	167.479	177.455	149.202	0	9.12044	8.32651	8.89168	9.86532	11.4114	0	166.545	155.767	160.246	171.761	0.125529	-0.0263104	-0.0114619	0.0466812	-0.0704512	-0.0328128	0.0315906
2051618	c1(c2ccccc2)cc(ccc1)Cl	3-Chlorobiphenyl	4.38	0	2.7843	7.75233	64.1876	0	0	12	0	0	0	0	0	1	0	0	1	2997.02	62.996	104.791	69.8956	64.4802	65.9486	59.8464	43.0804	10.4993	194.916	190.902	166.471	125.029	7.41036	7.38185	7.32197	7.33316	7.40067	7.36656	152.452	137.933	149.957	152.33	0.084386	-0.0207301	-0.0101267	-0.0139702	-0.00556081	0.00805122	-0.00362282
818611	C(OCCO)(C=C)=O	2-Hydroxyethyl acrylate	4.38	0	0.0726	0.00527076	28.3528	0	0	0	0	3	0	0	0	0	0	0	0	1497.35	2.03213	86.8217	51.4566	47.1285	48.2359	20.7893	6.18017	1.01606	147.913	139.115	87.6387	54.2728	8.21909	8.18789	8.35956	8.01643	7.49108	7.45654	166.854	150.053	170.205	166.223	0.488103	-0.283193	-0.0051503	0.179258	-0.230491	0.134988	-0.0269535
26896184	CC(C)CCCCCC(O)O	Isononanoic acid	4.39	0	-1.1119	1.23632	38.6727	0	0	0	0	2	0	0	0	0	0	0	0	1830.63	939.254	59.6208	23.2177	19.3369	22.0116	22.0381	22.0758	28.4622	92.9084	100.369	98.3399	95.4413	7.38508	7.26269	7.12518	7.21366	7.25362	7.3107	168.078	148.254	164.983	169.989	0.425488	-0.25957	0.127386	-0.140049	0.0566338	0.000497	-0.00423722
616728	c1(cc(c(C)cc1C)[N+](=O)[O-])[N+](=O)[O-]	m-Xylene, 4,6-dinitro-	4.39	0	2.7228	7.41364	45.9552	0	0	6	2	4	0	0	0	0	0	0	0	2578.51	0	112.902	92.7501	70.1674	53.599	82.0168	16.127	0	169.898	126.165	125.132	82.0136	8.54009	8.05742	8.25153	8.62978	8.85572	9.47117	166.272	152.653	152.384	166.161	0.124564	-0.0250436	-0.0222607	0.0413313	-0.0476028	-0.0659438	0.0997116
693163	C(C[C@@H](C)N)CCCC	2-Octylamine	4.4	0	-2.1377	4.56976	33.9754	0	0	0	1	0	0	0	0	0	0	0	0	1369.61	152.423	52.3017	19.4308	16.4935	17.3671	16.4039	14.9154	6.35095	90.1056	93.2091	89.2111	83.0324	7.07773	7.08861	6.98577	7.01696	7.02334	7.03319	169.251	149.985	167.957	170.378	0.167951	-0.0857609	0.015251	-0.0351485	0.0187254	-0.000129	0.0011896
27458942	OCCCCCCC(C)C	Isononyl alcohol	4.4	0	-0.7722	0.596293	37.6428	0	0	0	0	1	0	0	0	0	0	0	0	1574.67	549.89	54.9117	20.7512	17.3624	19.233	18.7401	18.0197	18.3297	91.2257	97.4627	94.762	90.8148	7.18619	7.09344	7.02926	7.08497	7.1033	7.13009	167.498	146.973	164.592	169.607	0.242009	-0.101613	-0.0321761	0.00360662	0.00639406	0.000191	-0.00189049
111864	C(CCCC)CCCN	Octylamine	4.4	0	-2.415	5.83223	32.3026	0	0	0	1	0	0	0	0	0	0	0	0	1369.61	295.451	52.3017	18.5396	18.0413	17.3671	16.4039	14.9154	12.3104	96.0077	93.2091	89.2111	83.0324	7.07773	7.0092	7.0125	7.01696	7.02334	7.03319	169.251	149.985	168.325	168.924	0.170779	-0.0798106	-0.0186454	0.00940962	0.000806	-3.01e-05	-0.00016
100447	c1(ccccc1)CCl	Benzyl chloride	4.4	0	1.9637	3.85612	40.0635	0	0	6	0	0	0	0	0	1	0	0	1	2273.66	0	101.359	65.5807	50.3591	44.9729	12.5886	0	0	129.525	103.586	62.4429	0	7.45923	7.31642	7.36172	7.43504	7.48138	0	156.676	140.363	152.431	163.967	0.0779396	-0.00713451	-0.0384175	-0.002068	0.00352527	0.008726	-0.00360106
3452979	CC(CCO)CC(C)(C)C	3,5,5-Trimethyl-1-hexanol	4.4	0	1.2741	1.62333	42.6051	0	0	0	0	1	0	0	0	0	0	0	0	1574.67	9.14458	54.9117	25.0273	17.6788	17.786	11.8987	6.65844	1.01606	85.9845	103.792	62.2922	54.728	7.18619	7.18956	6.97254	7.23838	6.95517	7.58419	167.498	146.973	157.034	171.896	0.240165	-0.104903	-0.0106515	-0.0364382	0.0642036	-0.084614	0.10579
143088	CCCCCCCCCO	Nonyl alcohol	4.4	0	-2.4134	5.8245	33.5567	0	0	0	0	1	0	0	0	0	0	0	0	1574.67	506.01	54.9117	19.8639	19.5915	19.233	18.7401	18.0197	16.867	99.4269	97.4627	94.762	90.8148	7.18619	7.06151	7.07164	7.08497	7.1033	7.13009	167.498	146.973	167.136	167.519	0.242706	-0.1005	-0.040393	0.0153314	0.00133069	3.37e-05	-0.000112
709988	c1(cc(c(Cl)cc1)Cl)NC(CC)=O	Propanil	4.4	0	1.1453	1.31171	57.6053	0	0	6	1	1	0	0	0	2	0	0	2	4273.09	643.827	120.241	114.618	82.2284	78.2747	86.8084	76.1551	53.6523	183.067	185.072	178.869	139.538	8.00161	8.0421	8.05678	7.83637	7.78151	7.61494	160.837	145.894	162.304	164.327	0.267102	-0.166755	0.0924344	-0.0659911	0.0250826	-0.0037508	-0.0538238
100425	c1(ccccc1)C=C	Styrene	4.41	0	1.9153	3.66837	39.8829	0	0	6	0	0	0	0	0	0	0	0	0	1162.24	0	78.1856	41.7124	25.854	14.6617	5.1752	1.01606	0	132.421	93.5341	62.4536	31.0837	7.12949	7.13712	7.0707	6.95466	6.86815	6.71846	155.856	139.958	153.346	157.78	0.0601162	-0.00782744	-0.0182846	-0.000673	-0.0161384	0.00188775	0.00436927
554007	c1(c(ccc(c1)Cl)N)Cl	2,4-Dichloroaniline	4.41	0	0.9441	0.891325	43.938	0	0	6	1	0	0	0	0	2	0	0	2	3580.27	0	139.283	128.495	126.775	62.3974	35.7336	0	0	165.998	95.581	125.161	0	8.08488	8.10507	8.12482	7.54821	9.0072	0	159.494	147.937	156.922	167.555	0.185881	-0.114207	0.0239177	0.0261995	-0.0825434	0.0860577	-0.0323651
99616	c1(cc(ccc1)C=O)[N+](=O)[O-]	3-Nitrobenzaldehyde	4.42	0	1.2287	1.5097	39.2473	0	0	6	1	3	0	0	0	0	0	0	0	1979.03	0	117.436	82.2874	65.5155	85.8522	74.1984	0	0	157.841	163.648	109.242	0	8.53954	7.96047	8.35025	8.96558	10.0972	0	161.234	147.877	154.619	167.12	0.198549	-0.0459944	-0.0627347	0.0587922	-0.0290823	-0.0398663	0.0196109
1126790	c1(OCCCC)ccccc1	Butyl phenyl ether	4.42	0	0.2894	0.0837524	48.3367	0	0	6	0	1	0	0	0	0	0	0	0	1712.83	289.635	74.0882	36.2903	32.6118	30.8829	30.5605	21.6258	12.0681	129.105	134.68	142.952	117.73	7.31261	7.38061	7.39142	7.31656	7.08283	7.02686	161.69	143.662	162.876	163.406	0.179892	-0.0530431	-0.0273128	-0.000493	-0.00636061	-0.0263404	0.0146424
872311	c1(ccsc1)Br	3-Bromothiophene	4.42	0	0.9369	0.877782	34.4483	0	0	5	0	0	1	0	0	0	1	0	1	7992.6	0	244.332	343.309	27.5251	0	0	0	0	70.0114	0	0	0	7.7137	7.72877	7.26019	0	0	0	145.425	134.01	151.648	176.828	0.0397637	-0.00869136	-0.0102747	-0.00347234	0.00255656	0	0
1194656	c1(c(cccc1Cl)Cl)C#N	Dichlobenil	4.42	0	1.9799	3.92	45.3667	0	0	6	1	0	0	0	0	2	0	0	2	3722.5	0	158.922	163.421	232.196	46.6751	14.1191	0	0	253.059	143.334	86.9662	0	8.25322	8.11545	8.6726	8.41008	8.27885	0	153.067	138.663	151.246	162.154	0.170862	-0.0367598	-0.0274702	-0.108541	0.128016	-0.0247594	-0.0159166
7700176	c1([C@@H](OC(\C=C(\OP(OC)(OC)=O)C)=O)C)ccccc1	Crotoxyfos	4.42	0	1.5773	2.48788	83.0298	0	0	6	0	6	0	1	0	0	0	0	0	4534.18	3543.1	123.803	80.8244	65.3201	56.6203	56.333	49.3213	60.0525	172.261	159.887	149.844	132.669	7.99134	7.98941	8.23928	8.05143	7.79881	7.4975	162.781	144.884	154.395	160.888	0.818428	-0.688143	0.517203	-0.180086	0.134617	-0.644106	0.571125
590863	C(C(C)C)C=O	Isovaleraldehyde	4.42	0	0.4153	0.172474	25.1109	0	0	0	0	1	0	0	0	0	0	0	0	987.449	0	59.3528	22.4556	15.7474	8.57153	0	0	0	69.3699	56.5487	0	0	7.38993	7.25331	7.09958	8.09482	0	0	166.787	146.116	163.112	175.304	0.132861	-0.0279701	-0.0334421	-0.0273253	0.0501256	-0.0278186	0
50317	c1(c(c(ccc1Cl)Cl)Cl)C(=O)O	2,3,6-TBA	4.42	1	2.0741	4.30189	51.1036	0	0	6	0	2	0	0	0	3	0	0	3	5294.94	0	180.793	233.413	286.781	227.01	16.2221	1.01606	0	284.386	204.125	87.0017	31.0837	9.05795	8.7424	9.60552	9.60427	8.35713	6.71846	154.513	141.582	150.817	158.791	0.410141	-0.233907	0.1222	-0.204814	0.114634	0.0418657	-0.0592463
2243278	C(CCCC#N)CCCC	Octyl cyanide	4.42	0	-1.6072	2.58309	34.1161	0	0	0	1	0	0	0	0	0	0	0	0	1511.85	435.651	58.7758	21.5066	21.4505	21.3733	21.2606	21.0802	20.7453	106.31	105.268	103.745	101.308	7.12149	7.03487	7.0424	7.05274	7.06787	7.09206	166.518	145.427	166.69	167.063	0.11832	-0.026838	-0.0226417	-0.0116957	-0.000802	-0.000104	-0.000444
2245387	c12c(cc(C)c(c2)C)cccc1C	1,6,7-Trimethylnaphthalene	4.42	0	3.287	10.8044	61.9988	0	0	10	0	0	0	0	0	0	0	0	0	1889.66	15.241	78.1856	58.9099	35.5783	24.2943	18.9688	5.86839	1.01606	160.236	120.657	114.891	67.6819	7.11427	7.25441	7.13391	7.01457	7.03958	6.8931	156.932	139.958	144.855	153.233	0.0529012	-0.00181219	0.00198562	-0.0160214	-0.0245589	0.00759998	-0.011987
76017	C(C(Cl)Cl)(Cl)(Cl)Cl	Pentachloroethane	4.43	0	2.8878	8.33939	36.3209	0	0	0	0	0	0	0	0	5	0	0	5	6573.06	0	326.474	849.713	0	0	0	0	0	0	0	0	0	10.2722	11.0528	0	0	0	0	159.913	144.288	170.886	0	0.227612	-0.0781651	-0.100726	0.0650854	0	0	0
92693	c1(c2ccccc2)ccc(O)cc1	4-Hydroxybiphenyl	4.44	0	1.8525	3.43176	61.0769	0	0	12	0	1	0	0	0	0	0	0	0	1997.3	264.803	91.362	56.9364	44.4012	42.5504	39.6938	34.9368	26.4803	172.489	163.972	147.215	120.916	7.43576	7.41065	7.31442	7.18	7.26697	7.56855	154.616	140.207	150.763	154.382	0.243365	-0.11607	0.019563	-0.0147083	-0.0474045	0.0166314	0.0330938
126738	CCCCOP(=O)(OCCCC)OCCCC	Tributyl phosphate	4.45	0	-1.638	2.68304	60.311	0	0	0	0	4	0	1	0	0	0	0	0	3741.85	1988.74	97.3013	45.5404	49.9065	55.5243	48.1716	26.5337	20.0883	127.426	144.96	152.654	122.961	7.53675	7.41453	7.94071	8.11661	7.88599	7.714	167.411	146.668	166.084	169.023	0.56418	-0.533533	0.4177	-0.0264273	-0.154979	-0.030713	0.146702
63252	c12c(OC(NC)=O)cccc1cccc2	Carbaryl	4.45	0	1.5193	2.30827	62.97	0	0	10	1	2	0	0	0	0	0	0	0	2450.48	341.047	97.5949	69.9917	64.6469	61.5441	51.2315	32.5046	13.6419	194.818	185.102	161.113	131.511	7.74209	7.67414	7.93738	7.7882	7.70678	7.52939	159.145	144.85	153.004	156.093	0.382813	-0.319848	0.211174	-0.0408575	-0.0411912	-0.0117791	0.0447108
90437	c1(c2c(cccc2)O)ccccc1	2-Phenylphenol	4.45	0	1.8525	3.43176	61.0769	0	0	12	0	1	0	0	0	0	0	0	0	1997.3	29.2945	91.362	60.3728	52.8376	46.7684	30.8012	13.925	4.18493	182.936	170.185	133.064	90.8957	7.43576	7.41406	7.45605	7.46332	7.29104	7.07683	154.616	140.207	150.762	153.67	0.247012	-0.115761	-0.0130398	0.0141689	0.0139722	-0.0269546	-0.0149705
19406510	c1(c(c(cc(c1)N)[N+](=O)[O-])C)[N+](=O)[O-]	4-Amino-2,6-dinitrotoluene	4.46	0	1.0797	1.16575	45.223	0	0	6	3	4	0	0	0	0	0	0	0	2629.42	0	119.035	98.2183	80.5695	73.2035	61.1413	1.01606	0	174.184	134.137	111.433	31.0837	8.75355	8.22825	8.45127	9.08332	9.81584	6.71846	169.405	158.625	156.52	168.469	0.241286	-0.100019	0.0276623	-0.0854814	-0.00443697	0.149961	-0.129185
103651	c1(ccccc1)CCC	n-Propylbenzene	4.46	0	1.0335	1.06812	43.4114	0	0	6	0	0	0	0	0	0	0	0	0	1310.57	3.04819	68.7458	32.1511	25.0689	21.6258	12.0681	4.71307	1.01606	124.295	117.73	85.776	58.968	7.07077	7.06863	7.02856	7.02686	6.93567	6.85152	160.008	141.839	158.334	161.161	0.0522769	-0.00117241	-0.0196107	-0.00991274	-0.00174315	-0.00149175	2.81e-06
98544	C(c1ccc(O)cc1)(C)(C)C	p-tert-Butylphenol	4.47	0	2.2009	4.84396	50.468	0	0	6	0	1	0	0	0	0	0	0	0	1712.83	9.14458	72.333	44.2446	22.6465	18.6272	23.092	15.122	1.01606	110.501	100.501	84.3568	90.1944	7.31261	7.37465	7.0931	7.0275	7.16807	8.88278	161.69	143.883	150.239	164.981	0.223381	-0.121117	0.0504732	-0.034365	-0.0505175	0.0100636	0.10103
764136	C(=C/C=C(/C)C)(\C)C	Biisocrotyl	4.47	0	3.1124	9.68703	40.2054	0	0	0	0	0	0	0	0	0	0	0	0	1168.34	0	56.1594	30.1541	16.025	26.2334	12.1071	1.01606	0	89.2473	122.997	114.737	31.0837	7.01739	7.16528	6.91196	7.00697	7.11763	6.71846	163.782	144.346	150.349	170.093	0.0437299	0.00459336	-0.00859357	-0.0347386	0.0155407	0.00304643	-0.0288121
54576328	CCSCCCCSCC	3,8-Dithiadecane	4.47	0	1.3338	1.77902	50.8156	0	0	0	0	0	2	0	0	0	0	0	0	3228.09	543.048	91.8348	35.6619	36.6475	38.7545	30.8791	32.0289	22.627	130.539	110.724	108.082	101.158	7.09801	7.11777	7.10715	7.03774	6.99542	7.0266	162.769	142.845	160.773	158.987	0.0803759	-0.00653892	-0.0270987	-0.0128736	-0.00824043	0.011549	0.00509334
1638228	c1(ccc(O)cc1)CCCC	4-Butylphenol	4.47	0	0.1824	0.0332698	47.9285	0	0	6	0	1	0	0	0	0	0	0	0	1712.83	280.975	72.333	36.7519	27.134	27.3738	28.1019	19.039	18.7317	123.765	120.121	126.984	93.5326	7.31261	7.25975	7.17486	7.06634	7.30146	7.23823	161.69	143.883	159.128	162.328	0.226245	-0.113942	0.0235358	-0.0233124	-0.0303038	0.0400027	-0.0198573
298000	COP(=S)(OC)Oc1ccc(cc1)[N+](=O)[O-]	Parathion-methyl	4.47	0	2.1749	4.73019	63.8942	0	0	6	1	5	1	1	0	0	0	0	0	4627.53	2471.04	179.202	126.696	87.6476	87.493	64.0059	68.0798	95.04	187.999	197.201	154.441	131.843	8.44377	8.18412	8.62197	8.20417	7.82069	7.45002	162.282	148.023	151.191	161.471	0.456837	-0.32109	0.220211	0.0153611	-0.187356	0.0081723	-0.0539547
6203185	O=C\C=C\c1ccc(N(C)C)cc1	4-Dimethylaminocinnamaldehyde	4.47	0	1.1475	1.31676	59.8922	0	0	6	1	1	0	0	0	0	0	0	0	2052.28	629.698	82.7941	53.7782	36.289	31.2716	32.8102	44.7944	34.9832	148.314	126.902	116.874	156.476	7.45535	7.41103	7.24856	7.16498	7.34641	7.70014	161.36	145.233	152.176	159.088	0.247347	-0.0406436	-0.068149	-0.00473353	-0.0744434	0.0600329	0.0359775
90153	c12c(c(ccc1)O)cccc2	1-Naphthol	4.49	0	1.3847	1.91739	50.7583	0	0	10	0	1	0	0	0	0	0	0	0	1706.74	0	93.9973	63.9726	47.8209	26.1365	6.0565	1.01606	0	168.43	119.248	64.5976	31.0837	7.50024	7.47216	7.50645	7.41498	7.05765	6.71846	154.355	140.256	150.017	154.95	0.231633	-0.115718	-0.00495235	0.0211258	0.00870521	-0.0577944	0.0114365
88062	c1(c(cc(Cl)cc1Cl)Cl)O	2,4,6-Trichlorophenol	4.5	0	1.9464	3.78847	46.7099	0	0	6	0	1	0	0	0	3	0	0	3	4894.71	0	182.728	205.294	337.05	108.795	35.7336	0	0	256.563	126.243	125.161	0	8.84439	8.87275	9.1896	8.54444	9.0072	0	154.265	141.815	153.933	163.521	0.27644	-0.137182	-0.0258002	0.0578162	-0.0798077	0.0751455	-0.0283916
141935	c1c(cccc1CC)CC	1,3-Diethylbenzene	4.51	0	1.626	2.64388	49.2166	0	0	6	0	0	0	0	0	0	0	0	0	1456.87	9.14458	67.1725	37.567	28.8383	19.6644	11.4066	3.78882	1.01606	140.597	110.582	88.6045	51.997	7.06099	7.09927	7.08783	7.00442	6.9611	6.81826	160.7	142.152	156.172	156.569	0.0500384	-0.00225293	-0.00846076	-0.00977356	-0.0166998	0.00221417	-0.00371096
23135220	CNC(=O)ON=C(SC)C(=O)N(C)C	Oxamyl	4.51	0	0.3157	0.0996665	53.0132	0	0	0	3	3	1	0	0	0	0	0	0	3407.39	660.648	110.917	106.871	74.2779	84.2264	67.715	34.4079	21.3112	156.984	182.568	170.109	110.568	8.13065	8.27792	8.37859	8.57748	8.22688	7.60993	169.959	155.197	159.249	170.7	0.563955	-0.367464	-0.0477223	0.291663	0.008464	-0.375894	0.286408
693549	C(CCCCC)CCC(C)=O	2-Decanone	4.51	0	-1.8958	3.59406	38.6879	0	0	0	0	1	0	0	0	0	0	0	0	1718.93	674.488	57.7561	22.6741	21.1814	21.0793	20.9412	20.7439	20.439	104.568	103.473	101.992	99.8754	7.19762	7.19322	7.07977	7.09365	7.11243	7.13927	166.185	145.231	165.524	166.511	0.142802	-0.0429099	0.000801	-0.0339547	0.00171289	6.55e-05	-0.000277
52686	COP(=O)(OC)C(O)C(Cl)(Cl)Cl	Trichlorfon	4.51	0	1.2382	1.53314	47.5918	0	0	0	0	4	0	1	0	3	0	0	3	6338.54	0	208.299	235.891	159.189	88.3468	19.9529	0	0	184.292	158.027	82.3987	0	8.99344	9.22996	9.57496	7.93871	7.96687	0	167.139	148.865	158.846	170.204	0.766109	-0.419679	-0.0981514	0.21117	-0.066719	0.00552549	-0.0151999
333415	O(c1nc(nc(c1)C)C(C)C)P(=S)(OCC)OCC	Diazinon	4.51	0	1.9033	3.62255	80.3776	0	0	6	2	3	1	1	0	0	0	0	0	4900.02	2288.73	128.437	83.613	85.9743	74.7246	63.3475	37.909	30.5164	186.597	191.679	168.105	123.078	7.67754	7.80576	8.04585	8.1203	7.64292	7.39982	165.023	147.041	163.179	162.963	0.540539	-0.44423	0.427814	-0.329307	0.215869	-0.275929	0.139964
142927	C(CCCCC)OC(C)=O	n-Hexyl acetate	4.52	0	-1.1703	1.3696	33.9734	0	0	0	0	2	0	0	0	0	0	0	0	1682.31	471.635	65.4316	26.5545	26.7984	24.3481	24.9696	24.3804	26.202	114.205	103.589	101.52	101.333	7.48165	7.43894	7.32082	7.30723	7.38724	7.5154	167.075	146.83	167.851	165.533	0.271986	-0.159444	0.0779433	-0.0515989	-0.0138514	0.00766135	0.0103994
51218452	c1(N([C@@H](COC)C)C(CCl)=O)c(cccc1C)CC	Metolachlor	4.54	0	1.3827	1.91186	82.6396	0	0	6	1	2	0	0	0	1	0	0	1	4151.15	867.752	85.4761	69.5639	60.8126	58.2019	41.2422	24.4597	13.1478	185.245	175.601	128.81	90.7237	7.55841	7.675	7.56494	7.6128	7.47871	7.383	163.912	146.031	158.251	157.424	0.43282	-0.136708	-0.12612	0.115647	-0.141422	0.0417397	0.122058
95738	c1(c(ccc(c1)Cl)C)Cl	2,4-Dichlorotoluene	4.54	0	2.5872	6.6936	44.6702	0	0	6	0	0	0	0	0	2	0	0	2	3529.35	0	128.938	115.403	107.019	42.0798	35.7336	0	0	160.988	95.7461	125.161	0	7.81638	7.84013	7.87103	7.24431	9.0072	0	155.559	139.889	150.689	162.196	0.0668226	-0.0317193	0.0171299	-0.0219186	-0.00385836	0.0178746	-0.0109195
1570656	c1(c(cc(Cl)cc1Cl)C)O	2,4-Dichloro-6-methylphenol	4.54	0	2.0241	4.09698	46.2757	0	0	6	0	1	0	0	0	2	0	0	2	3785.32	0	133.141	132.163	126.782	49.0509	9.69545	0	0	178.567	107.526	54.6031	0	8.16234	8.21456	8.19108	8.05158	7.29065	0	157.427	142.734	150.837	162.809	0.249061	-0.136825	-0.000726	0.0598524	-0.100601	0.0766146	-0.0228458
110543	C(CCC)CC	n-Hexane	4.54	0	-1.0494	1.10124	23.4438	0	0	0	0	0	0	0	0	0	0	0	0	879.81	0	46.8853	15.0023	13.2875	10.4293	4.71307	1.01606	0	85.4173	76.6009	58.968	31.0837	6.96508	6.93293	6.91937	6.89675	6.85152	6.71846	167.481	146.194	168.325	169.324	0.0289841	-0.00441379	-0.0127622	-8.59e-05	3.83e-05	-0.000227	-0.00176812
6358641	c1(c(cc(OC)c(c1)Cl)N)OC	2,5-Dimethoxy-4-chloroaniline	4.54	0	-0.4218	0.177915	52.5088	0	0	6	1	2	0	0	0	1	0	0	1	3129.11	72.6425	106.971	114.555	82.4809	49.8526	23.8134	19.0094	12.1071	183.058	130.293	92.7687	84.777	8.02225	8.27969	8.05462	7.73729	7.58343	8.05218	164.265	150.185	153.796	158.869	0.43982	-0.173477	-0.109426	0.0811043	-0.0625073	0.101201	-0.0266713
1965099	c1cc(ccc1O)Oc2ccc(cc2)O	4,4'-Dihydroxydiphenyl ether	4.54	0	0.6329	0.400562	65.3971	0	0	12	0	3	0	0	0	0	0	0	0	2509.23	1078.35	101.113	67.1035	51.2188	62.7119	55.2648	50.778	51.35	166.81	191.851	191.179	158.666	7.90904	8.01344	7.81497	7.5148	7.50282	7.45641	157.083	143.471	155.566	159.966	0.515066	-0.289851	0.126678	-0.0738363	-0.229843	0.357845	-0.212729
78513	P(=O)(OCCOCCCC)(OCCOCCCC)OCCOCCCC	Tri(2-butoxyethyl) phosphate	4.55	0	-2.0307	4.12374	93.4415	0	0	0	0	7	0	1	0	0	0	0	0	5387.53	6481.96	92.4222	45.0902	48.9617	48.8273	50.625	43.9352	51.4441	130.409	127.454	141.098	120.297	7.65441	7.63211	7.76903	8.06109	7.51886	7.87747	167.726	147.572	166.932	166.001	1.06405	-0.614764	0.118713	0.234131	-0.721701	0.675827	-0.0131047
17754904	O=Cc1c(O)cc(N(CC)CC)cc1	4-(Diethylamino)salicylaldehyde	4.56	0	0.7241	0.524321	59.8418	0	0	6	1	2	0	0	0	0	0	0	0	2310.28	555.853	81.8292	58.1156	49.1864	28.7295	26.4253	27.9199	23.1606	166.474	119.776	104.257	113.58	7.60785	7.6068	7.59218	7.30054	7.32926	7.61198	163.815	147.162	161.015	156.02	0.418898	-0.148825	-0.0333379	-0.129303	0.199195	-0.177498	0.0781534
5465656	Clc1ccc(C(=O)C)cc1[N+]([O-])=O	4'-Chloro-3'-nitroacetophenone	4.56	0	1.5359	2.35899	48.44	0	0	6	1	3	0	0	0	1	0	0	1	3381.01	0	129.534	116.568	111.14	76.9471	117.835	22.6625	0	203.667	159.384	158.403	96.3961	8.57723	8.32641	8.57682	8.19403	9.07637	9.31651	161.032	146.945	154.693	160.012	0.217287	-0.0600068	-0.0261923	0.0270645	-0.0311673	-0.100388	0.117902
5292455	c1(c(cc(C(OC)=O)cc1)[N+](=O)[O-])C(OC)=O	Dimethyl nitroterephthalate	4.56	0	1.2479	1.55725	55.7101	0	0	6	1	6	0	0	0	0	0	0	0	3183.79	938.06	116.634	109.073	90.8991	93.8821	69.0234	59.9261	58.6288	202.372	192.892	149.422	126.225	8.69936	8.28867	8.83858	8.91165	8.29694	8.54347	163.698	148.924	150.194	162.372	0.608281	-0.324974	0.0355012	0.148787	-0.193418	-0.0360161	-0.158595
94622	c12c(ccc(c1)\C=C\C=C\C(N1CCCCC1)=O)OCO2	Piperine	4.56	0	-0.6352	0.403479	82.026	0	0	6	1	3	0	0	0	0	0	0	0	3435.9	2727.39	91.8936	51.5996	43.8868	42.2335	45.9064	48.9567	52.4498	153.806	150.071	162.869	161.581	7.65241	7.49884	7.54621	7.48625	7.49752	7.43007	160.913	144.498	158.421	160.826	0.510025	-0.263762	0.00143028	0.0313232	-0.0293257	0.0229915	-0.0434383
107197	C(#C)CO	Propargyl alcohol	4.56	0	0.3162	0.0999824	15.041	0	0	0	0	1	0	0	0	0	0	0	0	692.825	0	76.1629	34.6606	7.56655	1.01606	0	0	0	64.7294	31.0837	0	0	7.85589	7.42019	7.50643	6.71846	0	0	163.188	150.212	162.238	177.036	0.247008	-0.119599	-0.0296047	0.0544144	-0.0547622	0.0260477	0
831823	c1(Oc2ccccc2)ccc(O)cc1	p-Phenoxyphenol	4.58	0	1.196	1.43042	63.7916	0	0	12	0	2	0	0	0	0	0	0	0	2253.27	663.799	97.3101	61.263	50.4275	60.5879	50.719	39.6938	34.9368	168.953	200.376	188.637	147.215	7.68226	7.81456	7.69412	7.45381	7.34525	7.26697	155.9	141.794	155.647	159.042	0.345141	-0.179839	0.068686	-0.0440114	-0.121847	0.171908	-0.107523
79776	CC1=C(C(CCC1)(C)C)/C=C/C(=O)C	trans-beta-Ionone	4.58	0	1.5768	2.4863	60.6615	0	0	0	0	1	0	0	0	0	0	0	0	2151.72	132.416	67.9335	42.2918	28.0415	23.0574	25.5307	19.3899	2.87861	130.448	114.758	97.1932	112.696	7.22787	7.31702	7.09473	7.07178	7.07907	7.82267	162.71	143.062	152.4	160.283	0.155402	-0.0541623	0.0342396	-0.041002	-0.0534445	-0.0356727	0.152821
2495376	c1(COC(C(C)=C)=O)ccccc1	Benzyl methacrylate	4.58	0	2.2822	5.20844	55.1688	0	0	6	0	2	0	0	0	0	0	0	0	2111.03	496.422	86.5767	58.6535	36.7894	53.2234	47.3853	46.0624	17.7294	130.485	174.391	158.235	181.395	7.61083	7.59105	7.89058	7.55628	7.45288	7.50714	159.386	142.618	151.914	167.856	0.315287	-0.192441	0.0151349	0.136741	-0.163932	0.0327201	0.0400271
106241	C(\CC\C=C(\C)C)(=C\CO)C	Geraniol	4.59	0	2.3397	5.4742	51.2973	0	0	0	0	1	0	0	0	0	0	0	0	1716.9	542.908	61.1603	32.2932	24.3338	20.4914	24.2689	25.1402	14.287	111.836	99.7952	105.697	128.873	7.23066	7.20087	7.07048	7.19419	7.11249	7.2634	164.894	145.813	155.616	164.366	0.256752	-0.0986605	-0.0281593	-0.0268601	0.043894	-0.0419289	0.0328923
104552	c1(ccccc1)/C=C/C=O	Cinnamaldehyde	4.59	0	1.3765	1.89475	46.2731	0	0	6	0	1	0	0	0	0	0	0	0	1562.47	17.1431	88.1888	47.7067	39.508	44.9661	39.9106	31.46	8.57153	154.508	152.851	127.303	98.6852	7.498	7.30726	7.28156	7.34173	7.67805	7.92086	155.886	139.971	153.499	157.523	0.169969	-0.0335064	-0.0428589	-0.00792095	-0.033576	0.0284223	0.0150506
634935	c1(c(cc(Cl)cc1Cl)Cl)N	2,4,6-Trichloroaniline	4.59	0	1.3128	1.72344	48.6542	0	0	6	1	0	0	0	0	3	0	0	3	4835.95	0	168.832	182.276	273.027	66.2549	35.7336	0	0	230.65	106.034	125.161	0	8.46753	8.50341	8.78177	7.80252	9.0072	0	158.297	147.429	155.644	165.524	0.206857	-0.120504	0.00875182	0.0370585	-0.0702234	0.0738525	-0.0323638
999611	C(=O)(OCC(C)O)C=C	2-Hydroxypropyl acrylate	4.59	0	0.0619	0.00383161	32.9372	0	0	0	0	3	0	0	0	0	0	0	0	1643.65	8.12851	81.7113	46.5728	34.5998	59.3363	25.95	7.92806	1.01606	116.567	164.468	110.481	74.2107	8.02541	8.1288	7.99249	7.92139	7.77318	7.28278	166.647	149.102	167.576	172.85	0.487725	-0.294003	0.0258786	0.160133	-0.256468	0.179983	-0.0436729
140885	C(=O)(OCC)C=C	Ethyl acrylate	4.6	0	0.8624	0.743734	26.3543	0	0	0	0	2	0	0	0	0	0	0	0	1241.39	0	79.0101	45.5551	43.3398	20.8239	5.63732	1.01606	0	155.351	117.83	65.9391	31.0837	7.87691	7.94349	8.30985	7.59514	6.88478	6.71846	165.614	147.528	169.608	162.452	0.279033	-0.188873	0.0667934	0.044167	-0.06009	-0.0155552	0.00587034
544401	S(CCCC)CCCC	n-Butyl sulfide	4.61	0	-0.4356	0.189747	40.6617	0	0	0	0	0	1	0	0	0	0	0	0	2200.25	281.592	71.2945	29.5212	30.8729	22.2991	20.0883	13.2875	10.4293	110.433	107.376	112.388	85.4173	7.03705	7.02942	7.03686	7.04596	7.01092	6.91937	164.822	144.242	164.173	164.146	0.0593819	-0.00587311	-0.0272947	-0.000389	0.00980939	-0.0117001	-0.00169404
80546	CC(Cc1ccc(cc1)C(C)(C)C)C=O	Lilial	4.61	0	2.992	8.95206	68.045	0	0	6	0	1	0	0	0	0	0	0	0	2295.99	1269.75	70.1144	42.1318	26.5733	28.0711	25.8256	33.2225	30.9695	120.909	127.142	111.849	142.437	7.23681	7.26265	7.14579	7.10827	7.14828	7.29942	161.684	142.598	151.209	164.15	0.174346	-0.0338845	-0.0256774	-0.0133781	-0.0481823	0.0190518	0.0263834
106467	c1cc(ccc1Cl)Cl	1,4-Dichlorobenzene	4.62	0	2.1408	4.58302	40.3882	0	0	6	0	0	0	0	0	2	0	0	2	3383.05	0	147.133	113.227	87.0812	419.578	0	0	0	162.146	188.713	0	0	8.02235	7.9618	8.08508	8.50418	0	0	153.063	138.775	155.459	164.977	0.0660143	-0.0357925	0.0202337	0.0105648	-0.0532409	0.0252278	0
135193	c12c(ccc(c1)O)cccc2	Betanaphthol	4.62	0	1.3847	1.91739	50.7583	0	0	10	0	1	0	0	0	0	0	0	0	1706.74	1.01606	93.9973	59.8489	42.0915	33.6959	22.3103	6.25645	1.01606	159.469	126.401	91.9891	58.0003	7.50024	7.46807	7.33789	7.35117	7.55052	7.34884	154.355	140.256	150.018	155.82	0.228717	-0.114456	0.0259919	-0.0397162	-0.00302208	0.0276444	-0.0197502
94677	c1ccc(c(c1)/C=N/O)O	Salicylaldoxime	4.63	0	0.4942	0.244234	41.17	0	0	6	1	2	0	0	0	0	0	0	0	1725.09	1.01606	99.2434	67.7085	53.3641	47.4889	27.0958	6.25645	1.01606	145.302	116.399	94.5886	58.0003	8.04223	7.80414	7.94824	8.0934	8.23528	7.34884	162.596	149.322	154.783	165.261	0.375355	-0.142886	-0.0646335	-0.0182381	0.0367204	0.0944778	-0.162475
101848	c1(Oc2ccccc2)ccccc1	Diphenyl ether	4.63	0	1.7591	3.09443	62.1861	0	0	12	0	1	0	0	0	0	0	0	0	1997.3	249.249	93.1903	54.9147	49.4605	58.0087	45.8702	27.8178	14.6617	171.573	210.728	185.924	134.947	7.43576	7.59839	7.54642	7.37975	7.17718	7.064	154.616	139.977	155.736	157.912	0.175215	-0.069828	0.0106944	-0.0141845	-0.0138034	-0.0133772	0.00255943
618622	c1(cc(cc(c1)Cl)Cl)[N+](=O)[O-]	Benzene, 1,3-dichloro-5-nitro-	4.63	0	2.3541	5.54179	43.6059	0	0	6	1	2	0	0	0	2	0	0	2	4090.17	0	169.28	139.396	207.108	304.286	16.127	0	0	221.288	251.52	82.0136	0	9.03249	8.55041	9.08289	10.7946	9.47117	0	159.57	147.977	156.981	168.452	0.111406	-0.0331582	0.0509508	-0.074995	-0.0372961	0.0555476	-0.0167521
67367	O(c1ccc(C=O)cc1)c1ccccc1	p-Phenoxybenzaldehyde	4.63	0	1.3711	1.87992	67.2599	0	0	12	0	2	0	0	0	0	0	0	0	2397.53	944.288	98.9614	64.4223	54.0396	59.9658	55.6362	41.5828	44.9661	175.315	198.963	193.279	160.452	7.67659	7.70946	7.71761	7.55078	7.45504	7.19297	154.736	139.984	153.211	157.91	0.288756	-0.0999353	-0.0257009	0.0206082	-0.0284672	-0.0752436	0.0634446
2460493	c1(c(cc(Cl)c(c1)Cl)O)OC	4,5-Dichloroguaiacol	4.64	0	1.0791	1.16446	48.6372	0	0	6	0	2	0	0	0	2	0	0	2	4041.29	0	139.431	175.66	119.422	86.4792	43.653	35.7336	0	197.278	141.147	106.668	125.161	8.46759	8.65894	8.50396	8.07045	7.65963	9.0072	159.076	144.92	153.078	159.09	0.389493	-0.165983	-0.0694274	0.0737151	-0.103306	0.0831697	0.00754881
732116	c12c(C(=O)N(C1=O)CSP(OC)(OC)=S)cccc2	Phosmet	4.64	0	1.8226	3.32187	81.9688	0	0	6	1	4	2	1	0	0	0	0	0	5834.23	2646.25	185.468	133.795	97.0186	110.975	97.6955	108.472	63.006	194.718	210.762	162.777	227.023	8.09641	7.90426	8.44216	7.9486	7.97079	7.80938	157.788	142.992	144.944	157.241	0.621474	-0.372548	0.195272	-0.15611	0.134123	-0.407045	0.299538
99865	C=1(C(C)C)CCC(C)=CC1	alpha-Terpinene	4.64	0	1.8841	3.54983	47.6977	0	0	0	0	0	0	0	0	0	0	0	0	1458.9	18.2892	62.9367	34.3025	19.5805	12.4355	14.2629	9.88888	1.01606	111.278	82.2306	85.1302	98.006	7.03464	7.12198	7.00978	6.90911	6.90632	7.0378	162.563	142.996	154.125	162.353	0.0468022	0.00108491	-0.00316344	-0.027743	-0.0150274	0.0139573	0.00890843
1912249	CCNc1nc(nc(n1)Cl)NC(C)C	Atrazine	4.64	0	-0.4114	0.16925	54.3212	0	0	6	5	0	0	0	0	1	0	0	1	3406.02	469.204	96.9459	62.1262	74.0587	67.7344	71.6534	27.8007	17.3779	150.443	180.979	173.967	121.643	7.76666	7.71425	7.73252	8.14918	7.86394	8.09146	172.413	156.991	172.379	173.457	0.445213	-0.455647	0.534565	-0.554919	0.431554	-0.231887	0.131605
122394	c1(Nc2ccccc2)ccccc1	N,N-Diphenylamine	4.65	0	1.4928	2.22845	63.867	0	0	12	1	0	0	0	0	0	0	0	0	1938.54	249.249	88.1134	49.4154	40.3906	48.4855	43.0668	27.8178	14.6617	154.916	184.238	176.247	134.947	7.27462	7.36349	7.26636	7.21639	7.14851	7.064	156.953	143.109	157.348	161.533	0.154905	-0.0563182	0.0164186	-0.0386657	-0.014877	0.00167039	0.00816025
142825	C(CCC)CCC	Heptane	4.65	0	-1.3374	1.78864	26.3554	0	0	0	0	0	0	0	0	0	0	0	0	1026.11	9.14458	48.1499	16.1456	15.0023	13.2875	10.4293	4.71307	1.01606	90.7071	85.4173	76.6009	58.968	6.96865	6.94198	6.93293	6.91937	6.89675	6.85152	167.228	145.942	167.659	168.325	0.0331654	-0.00441388	-0.0148543	-9.76e-05	1.04e-05	4.11e-05	-0.000227
88040	c1(c(cc(O)cc1C)C)Cl	Chloroxylenol	4.66	0	2.1018	4.41756	45.8415	0	0	6	0	1	0	0	0	1	0	0	1	2675.93	0	99.2132	96.3352	48.095	36.2395	2.59413	0	0	143.939	115.535	35.36	0	7.69567	7.78045	7.71679	7.93852	6.8225	0	159.591	143.362	148.89	162.784	0.224136	-0.129255	0.0383382	-0.0113954	-0.00720511	-0.0286831	0.0261318
607818	c1ccccc1CC(C(=O)OCC)C(=O)OCC	Diethyl 2-benzylpropanedioate	4.66	0	1.9075	3.63856	70.6763	0	0	6	0	4	0	0	0	0	0	0	0	3061.86	1546.62	86.1689	56.3067	65.4405	60.7937	51.7957	39.9664	25.3544	178.834	176.574	151.843	144.283	7.77518	7.78882	8.16021	7.79788	7.97285	7.93137	162.373	144.383	160.397	159.229	0.578729	-0.269927	0.0898485	-0.398449	0.2984	0.122878	0.00599637
89838	c1(c(cc(C)cc1)O)C(C)C	Thymol	4.67	0	1.664	2.7689	49.891	0	0	6	0	1	0	0	0	0	0	0	0	1712.83	18.2892	72.333	48.3388	33.7722	17.6247	12.7045	9.88888	1.01606	131.679	103.52	78.7718	98.006	7.31261	7.36216	7.30983	7.49441	6.88422	7.0378	161.69	143.883	152.475	160.981	0.220428	-0.117456	0.0234894	-0.0124922	0.0520857	-0.130626	0.0754664
2051607	c1ccc(cc1)c2ccccc2Cl	2-Chlorobiphenyl	4.67	0	2.7843	7.75233	64.1876	0	0	12	0	0	0	0	0	1	0	0	1	2997.02	28.2784	104.791	78.134	75.6902	67.9908	45.072	16.7039	4.71307	205.949	196.436	154.069	99.0681	7.41036	7.3848	7.43981	7.46779	7.31407	7.0893	152.452	137.933	149.989	151.938	0.087416	-0.0195888	-0.0330874	0.00409415	0.0167724	-0.00266908	-0.015059
111251	C(CCC)CCBr	1-Bromohexane	4.68	0	-0.2003	0.0401201	30.8564	0	0	0	0	0	0	0	0	0	1	0	1	7263.44	0	96.76	39.5951	44.0284	51.4173	66.195	27.5251	0	103.879	101.217	95.8923	70.0114	7.14725	7.04343	7.05748	7.0809	7.12775	7.26019	165.213	145.136	166.8	167.417	0.0474758	-0.00669335	-0.0196255	-0.000329	-0.00036	0.000107	0.00675393
6361213	[N+](c1cc(C=O)c(cc1)Cl)([O-])=O	2-Chloro-5-nitrobenzaldehyde	4.68	0	1.5974	2.55169	43.9635	0	0	6	1	3	0	0	0	1	0	0	1	3234.72	0	143.292	126.279	103.69	118.014	211.958	0	0	189.187	181.195	171.297	0	8.87437	8.29022	8.7973	9.1536	10.9038	0	160.187	147.433	153.588	165.641	0.215515	-0.0507424	-0.0338796	0.0427758	-0.0480926	-0.0863622	0.0685437
133119	c1(C(Oc2ccccc2)=O)c(cc(N)cc1)O	Phenyl aminosalicylate	4.68	0	0.3135	0.0982823	71.4662	0	0	12	1	3	0	0	0	0	0	0	0	2850.71	1351.9	101.847	75.0926	70.1182	65.1912	78.5921	54.7952	39.7618	173.288	186.234	219.584	186.524	7.93524	7.91241	8.11582	8.23785	7.87039	7.83507	158.929	145.89	154.513	161.646	0.602153	-0.362745	0.100317	-0.214959	0.424271	-0.444342	0.364808
78342	P(=S)(SC1C(SP(=S)(OCC)OCC)OCCO1)(OCC)OCC	Dioxation	4.69	0	4.1074	16.8707	109.865	0	0	0	0	6	4	2	0	0	0	0	0	9323.52	6456.45	188.842	128.777	148.052	121.602	91.2857	66.6966	48.1825	231.228	204.406	179.687	139.284	7.85805	7.92781	8.20993	8.28501	7.81622	7.84643	161.827	144.156	159.31	147.155	0.904715	-0.468844	0.0683654	-0.229228	0.113882	0.383226	-0.494488
80057	C(c1ccc(O)cc1)(c1ccc(O)cc1)(C)C	Bisphenol A	4.69	0	2.2036	4.85585	76.3071	0	0	12	0	2	0	0	0	0	0	0	0	2692.15	1090.54	85.1267	59.4676	39.7036	31.8454	37.4828	38.3759	33.0467	161.845	136.247	132.18	134.85	7.49414	7.49639	7.29046	7.10678	7.25241	7.95254	158.53	142.632	148.874	155.223	0.42552	-0.234791	0.0752136	-0.0223052	-0.086956	-0.00903814	0.125655
2034222	c1(c(nc([nH]1)Br)Br)Br	2,4,5-Tribromoimidazole	4.7	0	2.312	5.34534	41.3055	0	0	5	2	0	0	0	0	0	3	0	3	19980.1	0	412.28	1149.94	4283.28	0	0	0	0	518.228	0	0	0	8.98102	8.94238	9.68919	0	0	0	156.275	153.128	153.377	146.594	0.212535	-0.190631	0.120206	-0.0357658	-7.67e-05	0	0
102067	c1(NC(Nc2ccccc2)=N)ccccc1	N,N'-Diphenylguanidine	4.7	0	1.4437	2.08427	71.7667	0	0	12	3	0	0	0	0	0	0	0	0	2477.23	1380.17	91.1929	53.8073	48.9603	55.0067	48.1745	44.7621	40.5932	154.75	170.301	165.569	175.46	7.4473	7.54884	7.42661	7.6433	7.46521	7.26712	161.585	148.799	161.798	164.35	0.353265	-0.252903	0.274199	-0.311778	0.156648	-0.044157	-0.0156711
693652	O(CCCCC)CCCCC	n-Amyl ether	4.7	0	-1.7563	3.08459	40.3105	0	0	0	0	1	0	0	0	0	0	0	0	1720.96	675.105	56.3999	21.9771	21.9921	22.0116	20.3173	20.4683	15.0023	101.869	100.369	101.793	112.277	7.16858	7.1614	7.18412	7.21366	7.24813	7.00584	167.321	146.554	167.422	167.825	0.195929	-0.0357309	-0.0781272	0.00339989	0.00955037	0.0220945	-0.0385871
118796	c1(c(cc(Br)cc1Br)Br)O	2,4,6-Tribromophenol	4.7	0	2.1984	4.83296	55.1639	0	0	6	0	1	0	0	0	0	3	0	3	20278.5	0	305.944	414.22	1404.25	242.268	80.5432	0	0	312.51	143.797	147.867	0	8.44893	8.49263	8.65353	8.16735	8.34365	0	147.667	138.817	146.449	153.762	0.243112	-0.128352	-0.0197273	0.0649389	-0.0801016	0.0634131	-0.0217272
66441234	c12c(oc(n1)Oc1ccc(cc1)OC(C(=O)OCC)C)cc(cc2)Cl	Fenoxaprop-ethyl	4.71	0	2.0079	4.03166	99.9615	0	0	15	1	5	0	0	0	1	0	0	1	5345.75	4102.77	112.777	84.7228	84.9097	79.1145	60.9483	63.2392	69.5384	208.585	198.893	173.257	182.332	8.10392	8.25961	8.27617	8.09266	7.79791	7.66988	159.698	144.309	159.782	157.318	0.77304	-0.528955	0.211701	0.0147927	-0.11993	0.121589	-0.16309
84833	c12c(C(C)(C)C(\N1C)=C/C=O)cccc2	Tribasenaldehyde	4.71	0	1.5126	2.28796	67.1479	0	0	6	1	1	0	0	0	0	0	0	0	2342.84	34.2861	84.1824	64.5708	44.1879	30.2719	13.8487	22.7723	8.57153	170.383	131.414	74.3285	77.7391	7.4119	7.45173	7.37666	7.24256	7.23137	7.37241	160.626	143.958	149.808	156.896	0.232108	-0.0525261	-0.0402094	-0.0248575	-0.0265008	0.0129143	-0.00334338
141037	C(CCC(OCCCC)=O)(OCCCC)=O	Dibutyl succinate	4.71	0	-1.1388	1.29687	54.55	0	0	0	0	4	0	0	0	0	0	0	0	2777.39	1712.98	73.4518	36.3292	40.939	46.657	41.6227	32.7601	31.7218	130.848	134.308	140.794	122.922	7.6763	7.60892	7.88903	7.89426	7.51526	7.77898	166.619	146.754	167.471	166.91	0.531736	-0.308131	0.151893	-0.00524024	-0.393418	0.360041	0.0338555
88963397	c1(c(c(ccc1Cl)Cl)Cl)N	Benzamine, 2,3,6-trichloro-	4.73	0	1.3128	1.72344	48.6542	0	0	6	1	0	0	0	0	3	0	0	3	4835.95	0	168.832	229.726	176.788	156.03	1.01606	0	0	210.633	139.785	31.0837	0	8.46753	8.5346	8.73038	8.3387	6.71846	0	158.297	147.429	155.66	165.455	0.215884	-0.117436	-0.0537451	0.117365	-0.0351003	-0.0349737	0.0159472
634673	c1(c(c(ccc1N)Cl)Cl)Cl	2,3,4-Trichloroaniline	4.73	0	1.3128	1.72344	48.6542	0	0	6	1	0	0	0	0	3	0	0	3	4835.95	0	168.832	259.267	173.316	73.9699	35.7336	0	0	201.225	126.94	125.161	0	8.46753	8.54452	8.50151	8.31113	9.0072	0	158.297	147.429	155.699	166.313	0.220176	-0.106413	-0.0503973	0.0398723	0.00686413	0.0316544	-0.0316684
90028	c1(c(cccc1)O)C=O	Salicylaldehyde	4.73	0	0.4523	0.204575	37.6351	0	0	6	0	2	0	0	0	0	0	0	0	1527.88	0	98.056	68.841	49.1031	21.3635	6.05304	0	0	135.941	82.964	48.0604	0	7.98652	7.77881	8.08527	7.8273	7.63603	0	157.865	143.003	153.008	164.043	0.335966	-0.135077	-0.0429073	-0.0381004	0.0946766	-0.0484531	0.00187799
90471	c1ccc2c(c1)c(=O)c3ccccc3o2	Xanthone	4.73	0	1.3644	1.86159	58.9107	0	0	12	0	2	0	0	0	0	0	0	0	2395.5	54.5247	107.722	84.1957	76.3258	61.6254	42.0609	21.9955	5.45247	212.604	205.917	177.042	120.519	7.75991	7.81027	8.03609	7.8054	7.36556	7.04017	152.112	138.405	149.9	153.951	0.428201	-0.159198	-0.0633806	-0.0786484	0.132084	-0.0352027	-0.0193267
87172	c1(C(Nc2ccccc2)=O)c(cccc1)O	Salicylanilide	4.73	0	0.9665	0.934122	69.0662	0	0	12	1	2	0	0	0	0	0	0	0	2594.74	1015.42	97.6946	67.3396	63.413	58.9264	64.1173	53.1705	31.732	172.473	178.176	203.525	188.181	7.73463	7.70686	7.89147	7.93276	7.66631	7.56112	157.947	144.402	155.437	161.612	0.450174	-0.258	0.0675005	-0.149985	0.258347	-0.180747	0.0722309
15972608	c1(N(C(CCl)=O)COC)c(CC)cccc1CC	Alachlor	4.73	0	1.0406	1.08285	77.7131	0	0	6	1	2	0	0	0	1	0	0	1	4004.85	485.507	87.7906	72.4167	66.658	59.9192	44.4481	23.7613	7.58605	193.233	174.376	136.433	92.5054	7.60308	7.61273	7.67298	7.62588	7.5886	7.44987	163.784	146.164	156.539	157.225	0.423816	-0.152862	-0.0568626	-0.0219048	-0.0185839	0.087174	0.00657587
1689834	c1(cc(c(O)c(c1)I)I)C#N	Ioxynil	4.74	0	1.2444	1.54853	62.1788	0	0	6	1	1	0	0	0	0	0	2	2	33674.6	0	318.507	478.1	1162.02	465.054	118.103	14.1191	0	314.631	241.953	172.097	86.9662	7.99478	7.89877	7.92184	7.94513	9.39425	8.27885	146.962	137.954	141.303	151.736	0.295596	-0.147017	-0.024178	0.114867	-0.138423	-0.0222287	0.125011
3687136	Clc1cc(Cl)c(OS(=O)(=O)C)cc1	Phenol, 2,4-dichloro-, methanesulfonate	4.74	0	1.4035	1.96981	55.4044	0	0	6	0	3	1	0	0	2	0	0	2	5325.1	107.201	205.57	135.095	218.96	157.83	88.0333	133.545	35.7336	264.503	225.384	149.64	137.765	8.73919	8.81606	8.67887	8.78301	8.17666	8.05011	157.74	140.252	159.973	152.63	0.293316	-0.193172	0.154161	-0.0803695	-0.0901854	0.126961	-0.116819
108703	c1(cc(cc(c1)Cl)Cl)Cl	1,3,5-Trichlorobenzene	4.74	0	2.5095	6.29759	45.1044	0	0	6	0	0	0	0	0	3	0	0	3	4638.74	0	181.606	155.932	423.904	35.7336	0	0	0	277.947	125.161	0	0	8.46878	8.4107	8.86352	9.0072	0	0	151.666	138.183	153.965	163.055	0.0820089	-0.0379561	0.0579217	-0.119121	0.0839839	-0.0258332	0
329715	c1(cc(c([N+](=O)[O-])cc1)O)[N+](=O)[O-]	2,5-Dinitrophenol	4.74	0	1.2669	1.60504	38.9967	0	0	6	2	5	0	0	0	0	0	0	0	2541.88	0	137.827	109.93	94.81	82.5095	132.809	255.968	0	174.582	144.45	158.992	216.391	9.36934	8.63488	9.20811	9.55573	10.3349	13.3517	167.657	157.511	159.819	171.829	0.31282	-0.12221	-0.0371733	0.00871458	0.0822444	-0.0818351	-0.0703306
95750	c1(c(ccc(c1)C)Cl)Cl	Benzene, 1,2-dichloro-4-methyl-	4.74	0	2.5872	6.6936	44.6702	0	0	6	0	0	0	0	0	2	0	0	2	3529.35	0	128.938	145.302	69.0424	50.7592	35.7336	0	0	147.914	119.265	125.161	0	7.81638	7.86397	7.55811	7.81649	9.0072	0	155.559	139.889	150.649	163.313	0.0753804	-0.0248608	-0.0272133	0.011735	0.00930112	0.00398753	-0.0106397
89985	c1(c(cccc1)Cl)C=O	o-Chlorobenzaldehyde	4.75	0	1.3841	1.91573	40.7458	0	0	6	0	1	0	0	0	1	0	0	1	2527.6	0	120.596	102.199	87.239	31.9349	8.57153	0	0	164.492	101.627	56.5487	0	7.98595	7.75416	8.17188	8.04156	8.09482	0	154.697	139.467	151.766	162.502	0.175692	-0.0391445	-0.0557558	-0.0169236	0.0426913	-0.00703563	-0.0116777
107142	C(C#N)Cl	Chloroacetonitrile	4.75	0	0.5772	0.33316	16.3762	0	0	0	1	0	0	0	0	1	0	0	1	1743.46	0	152.501	174.929	0	0	0	0	0	0	0	0	0	8.46587	9.21895	0	0	0	0	167.137	148.543	194.585	0	0.141543	-0.0191823	-0.0573265	0.00573746	0	0	0
629196	S(SCCC)CCC	n-Propyl disulfide	4.76	0	0.731	0.534361	42.632	0	0	0	0	0	2	0	0	0	0	0	0	2935.5	84.8353	121.169	48.4763	48.082	34.6482	19.4232	10.4293	4.71307	134.882	149.046	112.584	76.6009	7.12679	7.13679	7.23528	7.25827	7.01982	6.89675	162.012	142.454	161.629	157.573	0.0422727	0.000352	-0.019459	0.00249367	-0.000117	-0.0120417	-0.000148
583539	c1(c(cccc1)Br)Br	1,2-Dibromobenzene	4.77	0	2.3088	5.33056	46.0242	0	0	6	0	0	0	0	0	0	2	0	2	13638.9	0	236.122	519.873	191.007	54.0342	0	0	0	183.683	108.939	0	0	7.73674	7.72023	7.74673	7.80192	0	0	148.297	136.609	150.147	157.581	0.0560251	-0.0188828	-0.0270254	0.0270156	-0.000987	-0.00813283	0
108361	c1c(cccc1Br)Br	1,3-Dibromobenzene	4.78	0	2.3088	5.33056	46.0242	0	0	6	0	0	0	0	0	0	2	0	2	13638.9	0	236.122	223.465	709.722	54.0342	0	0	0	220.246	108.939	0	0	7.73674	7.70151	7.77949	7.80192	0	0	148.297	136.609	149.995	157.847	0.0491779	-0.0228644	0.0137084	-0.026645	0.0198636	-0.00865164	0
120821	c1(c(ccc(c1)Cl)Cl)Cl	1,2,4-Trichlorobenzene	4.78	0	2.5095	6.29759	45.1044	0	0	6	0	0	0	0	0	3	0	0	3	4638.74	0	181.606	212.42	226.195	431.151	0	0	0	230.491	220.072	0	0	8.46878	8.44783	8.73357	9.2671	0	0	151.666	138.183	153.984	162.988	0.0898311	-0.0368664	0.00203773	0.0037976	-0.0266299	0.0127454	0
106638	C(=O)(OCC(C)C)C=C	Isobutyl acrylate	4.79	0	1.0942	1.19727	35.3438	0	0	0	0	2	0	0	0	0	0	0	0	1533.98	12.1928	72.1549	38.7508	24.5836	49.0282	21.8145	7.17774	1.01606	97.4444	169.852	114.86	77.5576	7.62422	7.58003	7.7002	7.55045	7.6581	6.94022	165.594	146.574	162.187	175.678	0.287955	-0.192128	0.0527996	0.0853678	-0.134996	0.0669976	-0.0239383
62737	COP(=O)(OC)OC=C(Cl)Cl	Dichlorvos	4.8	0	1.0332	1.0675	42.2758	0	0	0	0	4	0	1	0	2	0	0	2	5080.82	0	214.075	167.898	122.207	175.501	71.6417	35.7336	0	172.34	201.58	120.106	125.161	8.94859	8.86919	9.27921	8.6779	7.26609	9.0072	166.094	148.35	152.489	172.457	0.585231	-0.528085	0.357685	0.162727	-0.557921	0.245138	0.0970707
148538	c1(c(c(ccc1)C=O)O)OC	2-Vanillin	4.8	0	-0.0463	0.00214369	44.2786	0	0	6	0	3	0	0	0	0	0	0	0	1930.15	0	98.9148	87.457	62.7721	33.5322	17.4042	6.05304	0	167.452	116.732	86.1837	48.0604	8.11195	8.09148	8.24478	7.98531	7.23299	7.63603	160.529	145.157	151.411	159.318	0.473896	-0.176287	-0.146786	0.150934	-0.0687808	-0.0336499	0.057586
7383199	O[C@@H](C#C)CCCC	1-Heptyn-3-ol, (+/-)-	4.8	0	-0.5585	0.311922	28.3602	0	0	0	0	1	0	0	0	0	0	0	0	1278.01	3.04819	63.5291	28.5777	23.5185	23.1152	15.806	5.94541	1.01606	108.287	102.33	93.9056	68.2628	7.33784	7.24427	7.25974	7.23477	7.37815	6.89587	164.601	146.507	164.745	166.483	0.258437	-0.135309	-0.00509745	0.0436312	-0.0621418	0.0440261	-0.0278028
80466	C(c1ccc(O)cc1)(CC)(C)C	4-(1,1-Dimethylpropyl)phenol	4.8	0	1.8658	3.48121	55.3164	0	0	6	0	1	0	0	0	0	0	0	0	1859.13	68.6166	70.6001	44.8705	25.5246	17.6989	22.0681	19.0438	5.71805	124.618	95.4444	92.2342	87.3219	7.27831	7.32173	7.13532	6.98246	7.1267	8.03904	162.103	143.932	152.358	160.711	0.227817	-0.121727	0.0439446	-0.0182181	-0.0626841	0.0083327	0.0858718
525826	c12c(oc(c3ccccc3)cc1=O)cccc2	Flavone	4.8	0	1.7255	2.97735	69.1542	0	0	13	0	2	0	0	0	0	0	0	0	2686.06	780.886	103.648	75.7292	71.1251	65.2587	59.0954	49.638	30.0341	206.944	205.861	201.765	185.305	7.66651	7.71438	7.85395	7.7073	7.59926	7.41169	152.666	138.619	150.523	153.427	0.43778	-0.161827	-0.0324607	-0.117657	0.101613	-0.00723043	0.000376
5331919	c12c(nc(s1)S)cc(Cl)cc2	5-Chloro-2-mercaptobenzothiazole	4.8	0	2.5332	6.4171	57.0122	0	0	9	1	0	2	0	0	1	0	0	1	4522.5	0	178.232	141.833	136.729	222.596	199.182	18.3748	0	240.36	250.049	162.709	78.1224	7.9615	7.92823	7.9005	7.9761	7.60205	7.86283	148.086	136.52	148.205	150.711	0.147852	-0.105262	0.0862198	-0.0824456	0.0457633	-0.0371028	0.0261589
104881	c1(ccc(cc1)Cl)C=O	4-Chlorobenzaldehyde	4.81	0	1.3841	1.91573	40.7458	0	0	6	0	1	0	0	0	1	0	0	1	2527.6	0	120.596	87.0405	57.9512	74.0421	301.449	0	0	147.377	129.758	227.698	0	7.98595	7.74872	7.89611	8.05667	10.8524	0	154.697	139.467	151.707	163.36	0.169179	-0.0494944	-0.0449213	0.0355769	-0.00106372	-0.0492367	0.02455
39905572	c1(ccc(N)cc1)OCCCCCC	4-Hexyloxyaniline	4.81	0	-1.4833	2.20018	57.7097	0	0	6	1	1	0	0	0	0	0	0	0	2202.64	1160.02	71.9252	36.0506	29.4297	29.7571	30.6477	30.5135	29.7442	122.702	121.254	126.703	131.421	7.32395	7.35786	7.30027	7.21024	7.30069	7.29911	164.596	147.377	163.325	164.819	0.299817	-0.135135	0.0267248	-0.0416844	-0.0973609	0.17556	-0.0794024
122145	c1(OP(OC)(OC)=S)cc(c([N+](=O)[O-])cc1)C	Fenitrothion	4.81	0	2.6213	6.87121	68.1762	0	0	6	1	5	1	1	0	0	0	0	0	4773.82	2610.23	166.473	121.32	83.4831	73.3841	72.889	64.5641	81.5696	185.478	172.978	162.594	139.381	8.29364	8.08699	8.41156	8.2855	7.70087	7.75948	162.619	147.643	148.965	161.076	0.456559	-0.320283	0.21179	0.001876	-0.121184	-0.075787	0.0379343
66762	c12c(oc(=O)c(c1O)Cc1c(c3c(cccc3)oc1=O)O)cccc2	Dicumarol	4.82	0	1.0812	1.16899	85.7036	0	0	12	0	6	0	0	0	0	0	0	0	4289.02	4332.69	114.398	96.3275	84.6347	78.5452	91.4349	77.6426	84.9548	211.031	205.517	203.093	206.079	8.21626	8.02976	8.46009	8.17148	8.49917	8.04683	155.157	141.606	148.692	156.573	1.19125	-0.728694	0.212867	-0.267277	0.539218	-1.06942	1.23188
112301	C(CCCCC)CCCCO	1-Decanol	4.82	0	-2.7014	7.29756	36.4683	0	0	0	0	1	0	0	0	0	0	0	0	1720.96	702.767	55.0287	20.078	19.8639	19.5915	19.233	18.7401	18.0197	100.92	99.4269	97.4627	94.762	7.16858	7.05355	7.06151	7.07164	7.08497	7.1033	167.321	146.727	166.835	167.136	0.246949	-0.1005	-0.0425145	0.0153314	0.00133166	4.67e-05	-1.32e-05
91576	c12c(ccc(c1)C)cccc2	2-Methylnaphthalene	4.82	0	2.3942	5.73219	53.4348	0	0	10	0	0	0	0	0	0	0	0	0	1597.07	3.04819	84.1927	53.1488	33.3629	25.5819	14.9766	5.04916	1.01606	149.965	127.594	100.169	61.503	7.14906	7.2159	7.09473	7.04343	6.99283	6.86362	154.472	138.762	147.636	156.284	0.0562904	-0.00275978	-0.0111727	-0.013408	-0.0110299	0.000406	-0.0019481
112209	NCCCCCCCCC	1-Nonylamine	4.82	0	-2.703	7.30621	35.2142	0	0	0	1	0	0	0	0	0	0	0	0	1515.91	492.207	52.6875	18.923	18.5396	18.0413	17.3671	16.4039	14.9154	98.0763	96.0077	93.2091	89.2111	7.06948	7.00666	7.0092	7.0125	7.01696	7.02334	168.892	149.421	167.864	168.325	0.175002	-0.0798106	-0.0207566	0.00941012	0.000813	2.04e-05	-5.74e-05
66332965	CC(C)Oc1cccc(c1)NC(=O)c2ccccc2C(F)(F)F	Flutolanil	4.83	0	1.8834	3.5472	88.8173	0	0	12	1	2	0	0	3	0	0	0	3	4259.7	4047.01	102.537	73.7738	77.6075	78.4386	56.5708	63.5817	61.3184	188.165	186.862	170.534	180.604	8.22024	7.97447	8.05616	8.45633	7.81192	7.75009	169.41	147.477	159.81	165.129	0.652315	-0.392765	0.159275	-0.111535	-0.0537856	0.0847667	-0.0106607
104518	c1(ccccc1)CCCC	n-Butylbenzene	4.83	0	0.7455	0.55577	46.323	0	0	6	0	0	0	0	0	0	0	0	0	1456.87	56.5569	67.1725	30.4363	24.4676	24.5001	21.6258	12.0681	4.71307	121.964	120.005	117.73	85.776	7.06099	7.05506	7.0208	7.00809	7.02686	6.93567	160.7	142.152	159.333	161.755	0.0565372	-0.00108346	-0.0217605	-0.0119149	-0.00233764	0.00931699	-0.00738639
708769	c1(c(cc(cc1OC)OC)O)C=O	4,6-Dimethoxysalicylaldehyde	4.83	0	-0.5449	0.296916	50.9221	0	0	6	0	4	0	0	0	0	0	0	0	2332.41	60.5737	99.4749	93.352	77.9796	42.9714	28.6111	16.119	4.03825	184.468	129.967	110.394	86.4925	8.19375	8.26311	8.30394	7.83381	8.46575	7.08382	162.267	146.561	150.244	156.134	0.601752	-0.189743	-0.0943079	-0.357402	0.656618	-0.287599	-0.135192
90131	c12c(c(ccc1)Cl)cccc2	1-Chloronaphthalene	4.85	0	2.3165	5.36617	53.869	0	0	10	0	0	0	0	0	1	0	0	1	2706.46	0	110.392	85.6625	75.7596	43.6262	8.92423	1.01606	0	195.383	141.002	73.9526	31.0837	7.47278	7.4398	7.49244	7.43324	7.107	6.71846	151.696	137.506	149.042	152.946	0.0720353	-0.0195542	-0.025053	0.010883	0.0114495	-0.0194432	-0.0021277
105997	C(CCCCC(OCCCC)=O)(OCCCC)=O	Dibutyl adipate	4.85	0	-1.7148	2.94054	60.3732	0	0	0	0	4	0	0	0	0	0	0	0	3069.99	2034.03	71.0389	33.8009	37.1235	37.7358	40.0013	35.6681	26.7636	127.051	130.913	140.668	123.59	7.58305	7.50027	7.70866	7.78537	7.71119	7.55001	166.472	146.418	166.922	166.394	0.536403	-0.321365	0.101355	-0.0036444	0.0332619	-0.0193059	-0.336094
616739	c1(cc(c(O)cc1C)[N+](=O)[O-])[N+](=O)[O-]	m-Cresol, 4,6-dinitro-	4.86	0	1.7133	2.9354	43.2787	0	0	6	2	5	0	0	0	0	0	0	0	2688.18	0	125.577	105.676	86.3053	67.5687	131.977	16.127	0	174.834	132.529	156.328	82.0136	9.01281	8.43578	8.74069	9.10025	10.2299	9.47117	167.34	155.536	155.532	168.458	0.312859	-0.118704	-0.0276642	0.0249923	-0.00415867	-0.154345	0.19989
95954	c1c(c(cc(c1Cl)Cl)Cl)O	2,4,5-Trichlorophenol	4.86	0	1.9464	3.78847	46.7099	0	0	6	0	1	0	0	0	3	0	0	3	4894.71	0	182.728	234.422	218.869	312.29	35.7336	0	0	224.726	189.378	125.161	0	8.84439	8.86588	9.0077	9.05584	9.0072	0	154.265	141.815	153.951	164.007	0.273391	-0.134801	-0.00553537	0.0121637	-0.0551833	0.0744268	-0.027766
102772	c1ccc2c(c1)nc(s2)SN3CCOCC3	2-(4-Morpholino)thiobenzothiazole	4.86	0	2.1496	4.62078	74.7638	0	0	9	2	1	2	0	0	0	0	0	0	4303.15	1260.08	132.032	87.1512	84.4463	84.0265	81.3464	56.5257	33.1601	187.047	191.205	214.87	201.946	7.67178	7.71852	7.51504	7.64941	7.90446	7.47819	158.441	143.79	158.124	154.819	0.3462	-0.106617	-0.175335	0.0928372	0.0341975	-0.0582369	0.0707545
72548	c1cc(ccc1C(c2ccc(cc2)Cl)C(Cl)Cl)Cl	TDE	4.86	0	4.3183	18.6477	87.8586	0	0	12	0	0	0	0	0	4	0	0	4	7056.67	2042.85	137.524	103.767	105.745	102.398	98.9197	221.527	120.168	226.736	212.51	204.801	218.64	7.8948	7.69464	7.6572	7.73714	7.85769	8.05317	153.462	138.525	149.433	151.679	0.178511	-0.0651885	-0.0273958	-0.0284765	0.0672936	0.0413558	-0.172854
4170303	C(=C\C)/C=O	Crotonaldehyde	4.86	0	0.6082	0.369907	22.2699	0	0	0	0	1	0	0	0	0	0	0	0	839.121	0	69.7599	30.7341	26.0784	8.57153	0	0	0	96.8025	56.5487	0	0	7.62041	7.38169	7.48494	8.09482	0	0	163.83	145.246	164.903	169.069	0.140655	-0.0348891	-0.04327	0.00838004	0.0149506	-0.015499	0
118967	c1(c(c(cc(c1)[N+](=O)[O-])[N+](=O)[O-])C)[N+](=O)[O-]	Trinitrotoluene	4.88	0	2.4897	6.19861	44.8909	0	0	6	3	6	0	0	0	0	0	0	0	3139.33	0	139.033	116.686	96.8335	101.776	169.658	16.127	0	194.094	156.659	180.529	82.0136	9.38529	8.52735	8.92369	9.54524	11.5719	9.47117	169.456	158.653	156.542	168.509	0.171473	-0.0211811	0.0303751	0.0763041	-0.219201	-0.10321	0.172472
16752775	C(=N\OC(NC)=O)(\SC)C	Methomyl	4.89	0	0.7558	0.571234	39.6027	0	0	0	2	2	1	0	0	0	0	0	0	2663.65	84.8353	113.191	85.1435	60.9761	70.3693	60.9746	20.9875	4.71307	157.926	138.273	166.46	111.773	8.03689	8.31787	8.57325	7.85288	8.06684	7.68815	169.193	154.286	164.883	170.137	0.336197	-0.266687	0.114777	0.112154	-0.183259	0.0790391	-0.00399402
87616	c1(c(cccc1Cl)Cl)Cl	1,2,3-Trichlorobenzene	4.89	0	2.5095	6.29759	45.1044	0	0	6	0	0	0	0	0	3	0	0	3	4638.74	0	181.606	268.909	226.195	35.7336	0	0	0	230.491	125.161	0	0	8.46878	8.48495	8.73357	9.0072	0	0	151.666	138.183	154.003	162.988	0.100682	-0.0274676	-0.0550807	0.0313069	0.0249706	-0.0240702	0
260946	c12c(nc3ccccc3c1)cccc2	Acridine	4.89	0	1.7565	3.08529	65.3271	0	0	14	1	0	0	0	0	0	0	0	0	2080.77	54.5247	98.6055	67.6492	53.0329	49.1379	40.8986	21.9955	5.45247	192.006	189.159	173.124	120.519	7.33454	7.41095	7.37967	7.23988	7.15381	7.04017	153.21	139.222	151.382	155.756	0.131522	-0.0513052	-0.0168408	0.0449373	-0.0466194	-0.00711622	0.00531598
92524	c1(c2ccccc2)ccccc1	Biphenyl	4.9	0	2.4156	5.83512	59.4714	0	0	12	0	0	0	0	0	0	0	0	0	1741.33	28.2784	86.8045	50.3999	42.9281	40.5932	27.8178	14.6617	4.71307	175.201	167.708	134.947	93.5341	7.16686	7.17692	7.14352	7.12321	7.064	6.95466	153.214	138.241	150.639	152.9	0.0733593	-0.0037067	-0.0285341	-0.00406511	-0.00272652	-0.000156	-0.0130561
620882	c1(Oc2ccccc2)ccc([N+](=O)[O-])cc1	4-Nitrobiphenyl ether	4.91	0	1.9724	3.89036	65.4038	0	0	12	1	3	0	0	0	0	0	0	0	2704.41	1356.37	109.265	72.664	63.5472	67.0897	63.8804	49.1829	64.5892	182.583	205.333	194.275	159.884	8.04837	7.92176	8.05603	7.84662	7.61475	7.37219	158.135	144.84	156.475	160.794	0.213793	-0.0855399	0.0165911	0.0245006	-0.0836698	-0.052879	0.0694882
5267276	c1(cc(c(N)cc1C)[N+](=O)[O-])[N+](=O)[O-]	Benzenamine, 4,6-dinitro-3-methyl- (9CI)	4.91	0	1.0797	1.16575	45.223	0	0	6	3	4	0	0	0	0	0	0	0	2629.42	0	119.035	98.8836	77.5663	59.7116	101.741	16.127	0	168.914	127.296	134.277	82.0136	8.75355	8.23516	8.4738	8.83396	9.39586	9.47117	169.405	158.625	156.598	169.979	0.246514	-0.102221	-0.0176696	0.0323886	-0.00697722	-0.134149	0.189532
55630	C(CO[N+](=O)[O-])(CO[N+](=O)[O-])O[N+](=O)[O-]	Nitroglycerin	4.92	0	2.0503	4.20373	28.5429	0	0	0	3	9	0	0	0	0	0	0	0	3330.17	1023.87	154.865	89.153	85.6591	122.093	149.613	245.345	255.968	153.651	163.113	171.46	220.746	10.3492	8.95827	9.41003	10.5457	11.0831	12.7914	180.388	171.609	172.841	180.752	0.33686	-0.211162	0.121734	0.0708025	-0.194184	0.0701063	-0.0787198
538681	c1(CCCCC)ccccc1	Amylbenzene	4.94	0	0.4575	0.209306	49.2346	0	0	6	0	0	0	0	0	0	0	0	0	1603.16	289.635	65.9488	29.2113	24.0562	24.0055	24.5001	21.6258	12.0681	120.37	118.479	120.005	117.73	7.05337	7.04536	7.0155	7.00417	7.00809	7.02686	161.238	142.396	160.047	162.161	0.0607639	-0.00106427	-0.0237848	-0.0119537	-0.00434001	0.00872249	0.00342245
83329	c12c3CCc1cccc2ccc3	Acenaphthene	4.95	0	1.6814	2.82711	56.4434	0	0	10	0	0	0	0	0	0	0	0	0	1741.33	0	89.1987	54.5163	42.8876	15.9422	3.23427	1.01606	0	178.406	109.262	47.8143	31.0837	7.16686	7.19946	7.16417	7.03898	6.7983	6.71846	153.214	137.764	149.057	151.217	0.0516474	-0.000893	-0.0153442	0.00152369	-0.0100395	-0.0330345	0.0242971
935955	c1(c(c(cc(c1Cl)Cl)Cl)Cl)O	2,3,5,6-Tetrachlorophenol	4.95	0	2.3151	5.35969	51.4261	0	0	6	0	1	0	0	0	4	0	0	4	6150.39	0	214.549	347.438	357.645	435.518	1.01606	0	0	291.499	242.502	31.0837	0	9.25648	9.35042	9.69572	9.79241	6.71846	0	152.976	141.269	152.604	161.978	0.312092	-0.124117	-0.0883263	0.0417285	0.0492667	-0.0489071	0.0143088
836306	c1(Nc2ccccc2)ccc([N+](=O)[O-])cc1	4-Nitrodiphenylamine	4.95	0	1.7061	2.91078	67.0847	0	0	12	2	2	0	0	0	0	0	0	0	2645.66	1356.37	103.969	66.2573	53.7055	56.9855	58.6931	47.1169	64.5892	166.794	183.849	187.087	155.017	7.87606	7.68031	7.74065	7.63082	7.50904	7.50338	160.157	147.559	157.913	163.414	0.193203	-0.0734778	0.0137195	-0.00926451	-0.064008	-0.00948382	0.0566257
55389	c1(OP(OC)(OC)=S)cc(c(SC)cc1)C	Fenthion	4.96	0	2.6541	7.04425	77.7764	0	0	6	0	3	2	1	0	0	0	0	0	5240.85	1857.23	161.863	123.434	75.3779	67.1503	58.0741	74.4906	58.0386	187.789	169.528	133.407	144.312	7.74355	7.79403	7.99239	7.66229	7.29383	7.73749	158.797	142.413	143.922	153.52	0.427109	-0.308863	0.229974	-0.0291455	-0.171375	0.0272035	0.0179345
2138229	c1(c(ccc(c1)Cl)O)O	4-Chlorocatechol	4.96	0	0.6459	0.417187	38.883	0	0	6	0	2	0	0	0	1	0	0	1	2639.3	0	124.591	101.392	79.0724	64.832	18.3748	0	0	141.466	92.2301	78.1224	0	8.40103	8.4018	8.43248	7.90036	7.86283	0	158.887	145.943	156.417	167.909	0.409416	-0.238237	0.00630317	0.119257	-0.176262	0.0986491	-0.0144181
446526	c1(c(F)cccc1)C=O	o-Fluorobenzaldehyde	4.96	0	0.9252	0.855995	36.1574	0	0	6	0	1	0	0	1	0	0	0	1	1631.84	0	106.481	77.8238	61.711	30.0923	8.57153	0	0	140.712	95.9627	56.5487	0	8.26626	7.98159	8.544	8.19276	8.09482	0	164.368	143.05	160.21	177.131	0.212564	-0.0517687	-0.056315	-0.0294469	0.0549057	-0.011978	-0.0116793
298044	P(=S)(SCCSCC)(OCC)OCC	Disulfoton	4.97	0	3.0305	9.18393	72.6323	0	0	0	0	2	3	1	0	0	0	0	0	5728.26	1082.86	166.368	95.126	101.188	71.4171	47.6841	35.3878	22.5596	199.682	158.168	139.001	108.015	7.49197	7.51912	7.81393	7.75237	7.17021	7.2325	161.535	143.002	159.09	149.593	0.325652	-0.190992	0.114417	-0.0381061	-0.0880142	0.0163819	0.0286915
110407	C(CCCCCCCC(OCC)=O)C(OCC)=O	Decanedioic acid, diethyl ester	4.98	0	-1.1352	1.28868	59.1324	0	0	0	0	4	0	0	0	0	0	0	0	3069.99	2106.49	71.0389	32.9489	36.3734	29.9068	27.7778	28.4352	29.2568	134.908	122.592	114.169	114.425	7.58305	7.49755	7.5664	7.5181	7.33437	7.37294	166.472	146.418	167.029	162.966	0.534816	-0.320068	0.119814	-0.0517045	0.00755014	-0.0306389	0.00669236
874420	c1(c(cc(Cl)cc1)Cl)C=O	2,4-Dichlorobenzaldehyde	4.99	0	1.7528	3.07231	45.462	0	0	6	0	1	0	0	0	2	0	0	2	3783.29	0	150.144	138.071	170.707	77.8996	301.449	0	0	205.5	140.211	227.698	0	8.3686	8.13123	8.56097	8.31098	10.8524	0	153.5	138.959	150.512	161.308	0.187856	-0.0507548	-0.0218929	-0.0419554	0.0586261	-0.0624679	0.0245169
95829	c1(c(ccc(c1)Cl)Cl)N	2,5-Dichloroaniline	4.99	0	0.9441	0.891325	43.938	0	0	6	1	0	0	0	0	2	0	0	2	3580.27	0	139.283	128.495	89.8475	152.172	1.01606	0	0	160.218	129.332	31.0837	0	8.08488	8.10507	8.11241	8.08439	6.71846	0	159.494	147.937	156.922	167.506	0.18529	-0.116282	0.0179706	0.0313072	-0.0181105	-0.0234528	0.0159225
109648	C(CBr)CBr	1,3-Dibromopropane	4.99	0	1.5128	2.28856	29.5342	0	0	0	0	0	0	0	0	0	2	0	2	13208.2	0	228.062	127.677	745.654	0	0	0	0	157.69	0	0	0	7.60511	7.40398	7.8456	0	0	0	160.82	143.838	166.693	169.093	0.0538308	-0.00628396	-0.0137515	-0.00957243	0.00269242	0	0
1929733	c1(c(cc(cc1)Cl)Cl)OCC(=O)OCCOCCCC	2,4-D-butotyl	5	0	0.603	0.363609	79.6663	0	0	6	0	4	0	0	0	2	0	0	2	5575.26	3596.73	105.304	75.6475	81.0376	59.5309	74.6554	63.4369	70.5241	167.869	145.488	159.031	164.692	8.00152	8.05777	7.84858	7.9304	8.02657	7.95417	162.678	145.168	163.626	160.759	0.653336	-0.25618	-0.215805	0.301149	-0.205533	-0.0393692	0.226866
636306	c1(c(cc(Cl)c(c1)Cl)Cl)N	2,4,5-Trichloroaniline	5	0	1.3128	1.72344	48.6542	0	0	6	1	0	0	0	0	3	0	0	3	4835.95	0	168.832	211.817	173.316	205.776	35.7336	0	0	201.225	158.577	125.161	0	8.46753	8.51333	8.50151	8.39776	9.0072	0	158.297	147.429	155.684	166.313	0.209448	-0.115806	0.00655192	0.0122694	-0.0445731	0.0686709	-0.0318371
602017	c1(c([N+](=O)[O-])cccc1C)[N+](=O)[O-]	2,3-Dinitrotoluene	5.01	0	2.2764	5.182	41.6732	0	0	6	2	4	0	0	0	0	0	0	0	2432.21	0	121.861	99.1304	92.7278	73.3074	12.6399	0	0	182.23	136.857	70.2606	0	8.78445	8.17925	8.68852	9.33189	8.83593	0	166.387	153.964	155.666	169.25	0.144743	0.00108558	-0.0622725	-0.0568138	0.0464645	0.0465131	-0.0473483
14816183	P(O\N=C(\c1ccccc1)C#N)(OCC)(OCC)=S	Phoxim	5.01	0	2.6427	6.98386	81.518	0	0	6	2	3	1	1	0	0	0	0	0	4893.92	2776.54	148.495	95.7209	102.352	91.0854	95.3424	65.7217	48.7113	212.879	197.542	206.052	177.269	7.84678	7.85802	8.17424	8.4124	7.97482	7.5953	161.513	145.111	160.659	156.379	0.522566	-0.288253	0.00740943	0.0743977	0.0250659	-0.259693	0.234059
3066715	C1(OC(C=C)=O)CCCCC1	Cyclohexyl acrylate	5.02	0	-0.9807	0.961772	34.3197	0	0	0	0	2	0	0	0	0	0	0	0	1824.54	58.589	76.0042	35.1281	30.9092	37.0535	29.6425	12.3803	4.18493	117.335	136.449	130.787	85.4866	7.54506	7.46854	7.56322	7.5954	7.4911	7.13071	164.036	144.724	164.607	167.817	0.289255	-0.195537	0.073159	0.0344521	-0.0668689	0.0115437	0.00189284
2032599	c1(cc(c(N(C)C)cc1)C)OC(NC)=O	Aminocarb	5.03	0	1.1923	1.42158	62.6741	0	0	6	2	2	0	0	0	0	0	0	0	2507.49	1090.86	84.6212	63.9012	46.9507	36.2059	28.5806	38.2626	40.4024	158.261	140.498	99.3521	129.885	7.66283	7.72858	7.66756	7.51654	7.22554	8.03528	166.026	150.334	154.063	162.247	0.442517	-0.324855	0.212812	-0.0666648	-0.0954704	0.0351258	-0.0072041
2894511	C(c1c(N)cccc1)(c1ccc(cc1)Cl)=O	2-Amino-4'-chlorobenzophenone	5.04	0	1.3238	1.75245	73.0834	0	0	12	1	1	0	0	0	1	0	0	1	3594.46	1635.14	108.555	83.5885	69.3479	65.6553	72.6844	51.1415	71.0932	193.189	192.326	194.281	149.288	7.72463	7.67946	7.82812	7.76037	7.58535	7.29888	156.244	142.904	151.264	157.33	0.318374	-0.15612	-0.0312837	0.00268629	0.13365	-0.104586	-0.0228375
13608872	c1(c(c(c(Cl)cc1)Cl)Cl)C(C)=O	2,3,4-Trichloroacetophenone	5.05	0	2.06	4.2436	54.6547	0	0	6	0	1	0	0	0	3	0	0	3	5185.27	0	157.893	228.068	192.859	97.0364	103.593	35.7336	0	254.81	170.7	145.925	125.161	8.44088	8.54449	8.5709	8.27823	8.25181	9.0072	154.64	139.492	151.435	154.129	0.21467	-0.0614144	-0.038926	-0.00714678	0.0165316	-0.0457027	0.0413796
132649	c12c3c(cccc3)oc1cccc2	Dibenzofuran	5.05	0	1.3679	1.87115	59.7459	0	0	13	0	1	0	0	0	0	0	0	0	1995.27	3.04819	102.462	70.8643	57.8906	44.2452	27.6078	6.135	1.01606	199.533	180.632	137.831	69.6928	7.50408	7.56919	7.58691	7.34869	7.08458	6.9027	151.73	138.261	150.03	152.257	0.165465	-0.0680962	-0.0210412	0.0301168	-0.0136505	-0.0132053	-0.0137677
534521	c1(cc(cc(c1O)C)[N+](=O)[O-])[N+](=O)[O-]	DNOC	5.05	0	1.7133	2.9354	43.2787	0	0	6	2	5	0	0	0	0	0	0	0	2688.18	0	125.577	106.268	81.4451	89.2033	74.1147	16.127	0	170.086	158.469	109.448	82.0136	9.01281	8.4377	8.80598	8.89688	10.0475	9.47117	167.34	155.536	155.59	168.235	0.312568	-0.119659	-0.0259526	0.051947	-0.101551	-0.0196853	0.113839
112129	C(CCCCCC)CCC(C)=O	2-Undecanone	5.06	0	-2.1838	4.76898	41.5995	0	0	0	0	1	0	0	0	0	0	0	0	1865.23	871.245	57.6109	22.5871	21.2599	21.1814	21.0793	20.9412	20.7439	105.41	104.568	103.473	101.992	7.17952	7.17115	7.06909	7.07977	7.09365	7.11243	166.129	145.151	165.396	166.259	0.147055	-0.0429099	-0.00132527	-0.0339545	0.0017164	0.000103	-3.83e-05
300765	COP(=O)(OC)OC(Br)C(Cl)(Cl)Br	Naled	5.06	0	2.8753	8.26735	58.2459	0	0	0	0	4	0	1	0	2	2	0	4	17850.1	0	292.565	718.872	298.608	356.134	127.084	50.6701	0	206.551	248.029	150.954	132.73	9.08993	9.15514	9.46907	9.03256	7.55736	8.78602	163.441	146.737	151.616	169.933	0.690602	-0.577635	0.359636	0.114424	-0.586539	0.361597	0.0845344
109773	C(C#N)C#N	Malononitrile	5.07	0	0.1042	0.0108576	16.9464	0	0	0	2	0	0	0	0	0	0	0	0	827.217	0	108.203	65.4921	196.196	0	0	0	0	243.314	0	0	0	8.06596	8.44281	10.2016	0	0	0	167.528	147.858	186.314	211.24	0.198082	-0.0149406	-0.021098	-0.131357	0.0683546	0	0
610399	c1(c(cc(C)cc1)[N+](=O)[O-])[N+](=O)[O-]	3,4-Dinitrotoluene	5.08	0	2.2764	5.182	41.6732	0	0	6	2	4	0	0	0	0	0	0	0	2432.21	0	121.861	95.0438	82.9433	90.6685	42.7462	16.127	0	167.003	153.98	117.113	82.0136	8.78445	8.17661	8.54335	9.30536	9.28259	9.47117	166.387	153.964	155.729	169.888	0.143464	0.00191507	-0.0442384	-0.0711208	0.00372315	0.0811864	-0.0220272
629049	C(CCCBr)CCC	Heptane, 1-bromo-	5.09	0	-0.4883	0.238437	33.768	0	0	0	0	0	0	0	0	0	1	0	1	7409.74	247.726	91.2235	36.6396	39.5951	44.0284	51.4173	66.195	27.5251	105.477	103.879	101.217	95.8923	7.12707	7.03406	7.04343	7.05748	7.0809	7.12775	165.256	145.029	166.388	166.8	0.0517187	-0.00669276	-0.0217386	-0.000257	-8.87e-05	-0.000352	0.000107
29232937	c1(nc(N(CC)CC)nc(c1)C)OP(=S)(OC)OC	Pirimiphos-methyl	5.09	0	1.3807	1.90633	79.1855	0	0	6	3	3	1	1	0	0	0	0	0	4950.94	2900.57	133.264	91.0057	74.6991	65.6996	62.9937	46.7756	38.1654	178.799	168.822	156.087	133.861	7.77036	7.83149	8.10852	7.79489	7.63916	7.57064	166.679	149.721	161.648	162.922	0.616031	-0.502938	0.482249	-0.367659	0.239901	-0.400498	0.338191
56382	P(Oc1ccc([N+](=O)[O-])cc1)(OCC)(OCC)=S	Parathion	5.09	0	2.6757	7.15937	72.4818	0	0	6	1	5	1	1	0	0	0	0	0	4920.12	2946.34	156.131	101.863	106.439	76.134	65.7692	49.0139	49.938	210.896	188.353	182.474	132.654	8.17165	8.0326	8.45606	8.43965	7.73906	7.27351	162.893	147.334	160.519	156.4	0.457971	-0.337616	0.268974	-0.0747346	-0.0417918	-0.0986092	-0.0401068
514103	C1[C@@H]2[C@@]([C@@H]3C(C=C(C(C)C)CC3)=C1)(CCC[C@]2(C(O)=O)C)C	Abietic acid	5.1	1	1.3773	1.89696	90.3137	0	0	0	0	2	0	0	0	0	0	0	0	3427.7	2022.89	72.6921	49.2021	35.3568	26.7494	22.0249	27.6809	22.2296	146.459	118.539	102.272	118.56	7.28976	7.28386	7.29902	7.19793	7.209	7.19551	162.583	142.998	151.692	158.396	0.370733	-0.232075	0.0918381	0.0109278	-0.086679	0.0607776	-0.0802327
96059	C(C(C)=C)(OCC=C)=O	Allyl methacrylate	5.11	0	1.7819	3.17517	35.5803	0	0	0	0	2	0	0	0	0	0	0	0	1531.95	10.1606	78.8269	57.0833	32.5463	46.257	19.1264	8.14601	1.01606	118.751	178.361	102.371	84.8606	7.71956	7.77626	8.16656	7.50225	7.18551	6.97507	163.56	145.846	156.844	173.801	0.300354	-0.201115	0.033773	0.135101	-0.155408	0.0482724	-0.0100646
91941	c1(c2cc(c(N)cc2)Cl)cc(c(N)cc1)Cl	3,3'-Dichlorobenzidine	5.11	0	0.7596	0.576992	76.0034	0	0	12	2	0	0	0	0	2	0	0	2	4647.13	1462.8	118.245	107.06	72.3182	75.5034	101.42	127.021	66.4907	192.218	182.596	213.372	196.486	7.7779	7.775	7.66801	7.43456	7.86652	8.11233	158.827	147.296	151.547	157.364	0.330476	-0.204921	0.00825313	0.119161	-0.159027	0.0926932	0.030643
85687	CCCCOC(=O)c1ccccc1C(=O)OCc2ccccc2	Butyl benzyl phthalate	5.12	0	1.5363	2.36022	91.981	0	0	12	0	4	0	0	0	0	0	0	0	3785.21	4038.32	90.7245	60.4371	61.2639	69.8542	62.9361	54.0148	51.118	167.874	183.213	200.336	184.047	7.69874	7.56761	7.94082	8.22343	7.77696	7.73289	159.285	142.382	155.927	160.908	0.609006	-0.341085	0.0308675	0.0929093	-0.288807	0.335136	-0.0664506
110065	CC(SSC(C)(C)C)(C)C	Disulfide, bis(1,1-dimethylethyl)	5.12	0	3.2484	10.5521	54.588	0	0	0	0	0	2	0	0	0	0	0	0	3228.09	0	106.722	56.9222	19.2583	56.1594	12.1071	1.01606	0	85.5282	217.663	114.737	31.0837	7.09801	7.38453	7.00002	7.25859	7.11763	6.71846	162.769	142.875	145.492	170.284	0.041433	-0.0231811	0.0566889	-0.055381	-0.0115613	0.0307164	-0.0658441
17804352	CCCCNC(=O)n1c(NC(=O)OC)nc2ccccc12	Benomyl	5.12	0	-0.0596	0.00355216	76.6771	0	0	9	4	3	0	0	0	0	0	0	0	3590.68	2691.98	95.0782	66.0965	70.9963	69.8175	68.5002	51.8167	37.3887	175.428	180.299	181.363	164.789	7.88106	7.77257	8.09375	8.03492	8.1441	7.89702	166.794	151.817	164.517	168.87	0.714392	-0.629927	0.593026	-0.58799	0.548729	-0.501332	0.327498
619158	c1(cc(c([N+](=O)[O-])cc1)C)[N+](=O)[O-]	2,5-Dinitrotoluene	5.15	0	2.2764	5.182	41.6732	0	0	6	2	4	0	0	0	0	0	0	0	2432.21	0	121.861	94.3025	71.9307	54.5851	76.6309	255.968	0	167.486	129.601	115.628	216.391	8.78445	8.1689	8.46855	8.808	9.51276	13.3517	166.387	153.964	155.641	167.976	0.122333	-0.0337674	-0.0335942	0.0734937	0.0260272	-0.113163	-0.0443844
2499958	C(OC(C=C)=O)CCCCC	2-Propenoic acid, hexyl ester	5.15	0	-0.5794	0.335704	38.6211	0	0	0	0	2	0	0	0	0	0	0	0	1826.57	640.113	68.4636	31.6055	28.8408	28.6381	27.3688	27.5583	30.4816	117.724	117.959	110.454	112.966	7.48383	7.35235	7.50175	7.35744	7.37734	7.48972	165.583	146.06	166.236	166.801	0.296819	-0.189472	0.0486207	0.0606576	-0.0835957	0.00303097	0.0186094
1740198	CC(C)c1ccc2c(CC[C@H]3[C@@](C)(CCC[C@]23C)C(=O)O)c1	Dehydroabietic acid	5.16	1	1.718	2.95152	90.7671	0	0	6	0	2	0	0	0	0	0	0	0	3425.67	1984.54	75.0223	52.413	38.2802	29.4506	23.7157	30.2981	23.9101	153.926	126.368	106.614	125.671	7.31261	7.30529	7.3377	7.24259	7.24426	7.18553	161.69	142.609	150.937	157.317	0.368008	-0.235295	0.0971887	0.0246007	-0.0999989	0.0362581	-0.048208
4117140	OCC#CCCCCCCC	2-Decyn-1-ol	5.16	0	-1.1846	1.40328	41.1623	0	0	0	0	1	0	0	0	0	0	0	0	1716.9	646.21	61.1603	24.5228	25.3616	23.7394	23.105	23.4157	23.9337	118.379	111.392	107.728	106.693	7.23066	7.03482	7.05712	7.13602	7.14722	7.18722	164.894	145.813	164.157	162.972	0.257263	-0.110827	-0.0380796	0.0362085	-0.0197283	-0.00724458	0.00733629
93914	c1(C(CC(C)=O)=O)ccccc1	Benzoylacetone	5.17	0	0.7249	0.52548	50.4013	0	0	6	0	2	0	0	0	0	0	0	0	1964.74	70.6517	88.5473	56.14	54.5215	49.3493	41.0783	23.1321	6.42288	161.002	161.264	149.518	103.408	7.69515	7.82342	7.65999	7.7704	7.62024	7.34872	158.546	141.175	155.81	159.72	0.270926	-0.0676296	-0.0107887	-0.14235	0.0971133	0.0108116	-0.0104468
14938353	c1(ccc(O)cc1)CCCCC	4-Pentylphenol	5.18	0	-0.1056	0.0111514	50.8401	0	0	6	0	1	0	0	0	0	0	0	0	1859.13	514.053	70.6001	34.6902	26.3562	26.4011	29.4473	26.4603	19.039	122.009	118.664	127.119	121.172	7.27831	7.22202	7.14717	7.05237	7.22137	7.26613	162.103	143.932	159.848	162.623	0.230492	-0.113922	0.021501	-0.0233538	-0.0322799	0.0396448	-0.00855134
2016571	C(CCCCC)CCCCN	Decylamine	5.18	0	-2.991	8.94608	38.1258	0	0	0	1	0	0	0	0	0	0	0	0	1662.21	688.964	53.0031	19.227	18.923	18.5396	18.0413	17.3671	16.4039	99.6675	98.0763	96.0077	93.2091	7.06269	7.00465	7.00666	7.0092	7.0125	7.01696	168.597	148.959	167.498	167.864	0.179224	-0.0798106	-0.0228679	0.00941014	0.000813	2.71e-05	-6.89e-06
1761611	c1(c(ccc(c1)Br)O)C=O	5-Bromosalicylaldehyde	5.19	0	0.905	0.819025	45.1693	0	0	6	0	2	0	0	0	0	1	0	1	7911.51	0	161.231	144.926	131.385	207.366	32.5621	0	0	176.73	135.324	86.988	0	8.22942	8.02673	8.29646	8.27068	8.17776	0	154.841	141.663	149.722	161.357	0.338178	-0.143599	-0.00833392	-0.0416117	-0.00447079	0.0628905	-0.0339642
7212444	CC(=CCC/C(=C/CCC(C)(C=C)O)/C)C	Nerolidol	5.19	0	3.7014	13.7004	73.6714	0	0	0	0	1	0	0	0	0	0	0	0	2446.35	1517.14	61.7236	34.4636	22.9756	22.2125	30.3414	28.5674	16.6719	113.278	107.136	124.603	140.446	7.16999	7.33576	7.10594	7.01444	7.06148	7.32712	164.172	144.92	156.019	164.389	0.282395	-0.126752	0.0453803	-0.084289	-0.0123156	0.0395042	0.0491653
6175491	C(CCCCCC)CCCC(C)=O	2-Dodecanone	5.19	0	-2.4718	6.1098	44.5111	0	0	0	0	1	0	0	0	0	0	0	0	2011.52	1068	57.49	22.5169	21.3222	21.2599	21.1814	21.0793	20.9412	106.078	105.41	104.568	103.473	7.16435	7.15335	7.06062	7.06909	7.07977	7.09365	166.081	145.084	165.292	166.06	0.151308	-0.0429099	-0.00345172	-0.0339545	0.00171661	0.000107	-4.4e-07
112425	CCCCCCCCCCCO	1-Undecanol	5.22	0	-2.9894	8.93651	39.3799	0	0	0	0	1	0	0	0	0	0	0	0	1867.26	899.523	55.1256	20.2506	20.078	19.8639	19.5915	19.233	18.7401	102.092	100.92	99.4269	97.4627	7.1539	7.04713	7.05355	7.06151	7.07164	7.08497	167.173	146.523	166.592	166.835	0.251192	-0.1005	-0.0446359	0.0153314	0.00133171	4.77e-05	-2.96e-07
67721	C(C(Cl)(Cl)Cl)(Cl)(Cl)Cl	Hexachloroethane	5.22	0	3.3764	11.4001	41.878	0	0	0	0	0	0	0	0	6	0	0	6	7828.74	0	385.572	1256.7	0	0	0	0	0	0	0	0	0	10.9418	12.0756	0	0	0	0	157.818	143.273	168.159	0	0.292481	-0.10968	-0.14624	0.10968	0	0	0
1689823	c1(\N=N\c2ccccc2)ccc(O)cc1	4-Hydroxyazobenzene	5.23	0	1.3501	1.82277	62.1725	0	0	12	2	1	0	0	0	0	0	0	0	2389.69	1151.12	99.2729	62.7969	51.629	68.5894	73.6105	50.6542	39.6938	157.335	202.023	240.616	188.796	7.65703	7.70895	7.75088	7.66036	7.56181	7.30679	159.146	145.258	159.927	168.941	0.295984	-0.133753	0.0186818	0.00903168	-0.116198	0.0793873	0.0294347
653372	c1(c(c(F)c(c(c1F)F)F)F)C=O	Pentafluorobenzaldehyde	5.25	0	0.5644	0.318547	36.6686	0	0	6	0	1	0	0	5	0	0	0	5	3071.53	0	168.219	212.476	212.005	200.061	161.553	0	0	221.162	176.134	134.957	0	10.9181	10.7125	11.635	12.2337	12.492	0	198.264	155.354	192.614	213.781	0.514388	-0.0245703	-0.165718	-0.155993	-0.0358167	0.0874209	0.0374828
118558	c1(C(Oc2ccccc2)=O)c(cccc1)O	Phenyl salicylate	5.26	0	1.5102	2.2807	67.9164	0	0	12	0	3	0	0	0	0	0	0	0	2653.5	1015.42	102.562	73.4286	72.9714	69.7305	74.3314	54.751	31.732	181.841	197.334	229.311	192.941	7.89487	7.84995	8.20645	8.22671	7.85072	7.58666	155.918	141.666	153.725	159.58	0.489215	-0.283141	0.0482776	-0.137363	0.284931	-0.165714	0.0367704
107186	C(CO)=C	Allyl alcohol	5.26	0	0.2588	0.0669774	17.424	0	0	0	0	1	0	0	0	0	0	0	0	694.857	0	61.9283	21.1479	6.18017	1.01606	0	0	0	54.2728	31.0837	0	0	7.6284	7.33877	7.45654	6.71846	0	0	167.534	150.859	170.28	181.01	0.232411	-0.111044	-0.0256006	0.0356257	-0.0376276	0.0224409	0
330938	O(c1ccc(cc1)F)c1ccc(cc1)F	4,4'-Difluorodiphenyl ether	5.26	0	1.5787	2.49229	62.4417	0	0	12	0	1	0	0	2	0	0	0	2	2717.14	1186.12	111.197	75.2814	63.48	78.5679	60.2757	58.6868	69.7716	185.2	218.85	196.53	157.674	8.24285	8.25194	8.16672	7.74724	7.43494	7.61633	164.932	143.565	164.003	166.083	0.264404	-0.1341	0.0825209	-0.0105622	-0.224551	0.177311	-0.0561903
30560191	N([P@@](OC)(SC)=O)C(C)=O	Acephate	5.26	0	0.0068	4.62e-05	40.3611	0	0	0	1	3	1	1	0	0	0	0	0	3538.53	0	190.682	118.067	76.4226	32.8371	9.30339	1.01606	0	159.163	126.339	79.5806	31.0837	8.13363	8.41449	8.57635	7.76425	7.50758	6.71846	167.062	149.274	158.639	167.99	0.455391	-0.3766	0.396012	-0.317108	0.0705963	0.0249556	-0.0512978
80068	CC(O)(c1ccc(Cl)cc1)c2ccc(Cl)cc2	Chlorfenethol	5.26	0	2.8473	8.10712	79.5039	0	0	12	0	1	0	0	0	2	0	0	2	4801.26	2042.85	111.9	85.0766	60.4274	47.7685	74.1809	75.5416	120.168	186.492	156.013	159.861	171.357	7.71351	7.75397	7.63331	7.35634	7.39795	7.76523	155.721	140.561	150.316	153.992	0.298597	-0.173122	0.0375937	0.067659	-0.0685257	-0.163003	0.18582
6846500	C([C@@H](OC(C(C)C)=O)C(C)C)(COC(C(C)C)=O)(C)C	2,2,4-Trimethyl-1,3-pentanediol diisobutyrate	5.27	0	2.7347	7.47858	78.7592	0	0	0	0	4	0	0	0	0	0	0	0	3362.58	2575.93	69.2169	48.239	32.514	46.5436	30.0744	25.8113	14.7196	118.39	165.181	117.427	121.778	7.51218	7.62098	7.84091	7.47365	7.51098	7.27362	166.361	146.165	157.297	171.931	0.543188	-0.353078	0.0746245	0.22589	-0.283212	0.0324793	0.0866126
112538	C(CCCCCC)CCCCCO	1-Dodecanol	5.27	0	-3.2774	10.7414	42.2915	0	0	0	0	1	0	0	0	0	0	0	0	2013.56	1096.28	55.2072	20.3928	20.2506	20.078	19.8639	19.5915	19.233	103.038	102.092	100.92	99.4269	7.14149	7.04184	7.04713	7.05355	7.06151	7.07164	167.047	146.351	166.393	166.592	0.255434	-0.1005	-0.0467573	0.0153314	0.00133171	4.77e-05	6.73e-07
454897	O=Cc1cccc(C(F)(F)F)c1	3-(Trifluoromethyl)benzaldehyde	5.28	0	1.9179	3.67834	41.2441	0	0	6	0	1	0	0	3	0	0	0	3	2497.98	0	123.022	94.6725	76.1048	104.306	94.9011	0	0	162.544	170.783	104.127	0	9.13342	8.12384	8.75866	9.35858	11.1132	0	178.533	148.345	157.578	181.427	0.408473	-0.222858	-0.033366	0.106525	0.0158028	-0.120812	0.0504717
2536314	COC(=O)C1(c2ccccc2-c3c1cc(cc3)Cl)O	Chloroflurenol-methyl	5.28	0	1.6591	2.75261	78.6034	0	0	12	0	3	0	0	0	1	0	0	1	4199.75	285.685	113.746	103.305	89.1014	85.7107	66.2085	45.2353	12.4211	230.083	203.707	158.851	125.476	7.97139	7.95189	8.03604	8.07671	7.84012	7.49261	155.351	140.766	147.065	150.845	0.562971	-0.295119	-0.157858	0.327793	-0.124097	-0.0496604	0.0306142
106376	c1(ccc(Br)cc1)Br	p-Dibromobenzene	5.28	0	2.3088	5.33056	46.0242	0	0	6	0	0	0	0	0	0	2	0	2	13638.9	0	236.122	223.465	191.007	2128.89	0	0	0	183.683	255.192	0	0	7.73674	7.70151	7.74673	7.93296	0	0	148.297	136.609	149.995	157.581	0.0479426	-0.0257986	0.013957	0.00774811	-0.0379283	0.0180505	0
5989275	C([C@@H]1CCC(C)=CC1)(C)=C	(d)-Limonene	5.28	0	2.1424	4.58988	46.0152	0	0	0	0	0	0	0	0	0	0	0	0	1458.9	15.241	62.9367	33.7654	18.476	11.6975	14.4169	12.1071	1.01606	106.99	77.8109	83.0155	114.737	7.03464	7.12828	6.99549	6.88977	6.89123	7.11763	162.563	142.996	153.58	163.448	0.0564909	1.79e-05	-0.00973295	-0.0321183	-0.004147	0.0112989	0.0109351
634662	c1(c(c(ccc1Cl)Cl)Cl)Cl	1,2,3,4-Tetrachlorobenzene	5.29	0	2.8782	8.28404	49.8206	0	0	6	0	0	0	0	0	4	0	0	4	5894.43	0	216.08	368.101	365.309	442.723	0	0	0	298.837	251.431	0	0	8.91521	8.97098	9.38206	10.03	0	0	150.27	137.591	152.529	161	0.124818	-0.0263683	-0.0609337	0.0260991	-0.00147534	0.000269	0
1198556	c1(c(c(c(Cl)c(c1Cl)Cl)Cl)O)O	3,4,5,6-Tetrachlorocatechol	5.29	0	1.752	3.0695	53.0316	0	0	6	0	2	0	0	0	4	0	0	4	6406.36	0	213.238	392.664	351.085	255.92	35.7336	0	0	282.781	192.564	125.161	0	9.549	9.70161	9.93031	9.44535	9.0072	0	155.296	144.421	152.701	163.45	0.511244	-0.211799	-0.158016	0.113601	-0.0429844	0.0981984	-0.0546215
99354	c1(cc(cc(c1)[N+](=O)[O-])[N+](=O)[O-])[N+](=O)[O-]	1,3,5-Trinitrobenzene	5.29	0	2.0433	4.17507	40.6089	0	0	6	3	6	0	0	0	0	0	0	0	2993.03	0	152.845	118.35	100.893	184.977	176.021	0	0	187.426	230.037	171.598	0	9.78409	8.72822	9.23572	10.7186	12.0582	0	170.108	161.037	160.819	172.254	0.170635	-0.021278	0.0522981	0.0672352	-0.251543	-0.0739397	0.14191
86748	c1ccc2c(c1)c3ccccc3[nH]2	Carbazole	5.29	0	1.1016	1.21352	61.4268	0	0	13	1	0	0	0	0	0	0	0	0	1936.51	3.04819	96.7869	64.0327	50.0513	37.1508	25.3918	6.135	1.01606	185.762	159.453	128.935	69.6928	7.32518	7.38055	7.34447	7.19082	7.05407	6.9027	154.411	141.594	151.633	155.352	0.140745	-0.0591945	-0.00400189	0.0160742	-0.0318576	-0.00717211	-0.000426
3428248	c1(c(cc(Cl)c(c1)Cl)O)O	4,5-Dichlorocatechol	5.3	0	1.0146	1.02941	43.5992	0	0	6	0	2	0	0	0	2	0	0	2	3894.99	0	154.14	184.714	129.044	123.407	35.7336	0	0	175.944	126.46	125.161	0	8.78369	8.81006	8.82948	8.45188	9.0072	0	157.69	145.436	155.179	166.695	0.432875	-0.236048	-0.00506286	0.0763524	-0.155845	0.159695	-0.0555296
74908	C#N	Hydrogen cyanide	5.3	0	0.5675	0.322056	7.0145	0	0	0	1	0	0	0	0	0	0	0	0	341.476	0	90.1726	0	0	0	0	0	0	0	0	0	0	8.15354	0	0	0	0	0	174.317	158.39	0	0	0.108537	-0.00988865	-0.0443799	0	0	0	0
471772	CC(=C1CC[C@H]2C(=C1)CC[C@@H]3[C@]2(C)CCC[C@@]3(C)C(=O)O)C	Neoabietic acid	5.31	1	2.1484	4.61562	90.2818	0	0	0	0	2	0	0	0	0	0	0	0	3427.7	1992.58	72.6921	50.1872	35.1445	26.4352	20.8361	26.4534	24.007	146.17	118.458	98.4773	113.289	7.28976	7.29713	7.29736	7.1962	7.20658	7.16827	162.583	142.998	150.86	158.347	0.365998	-0.225481	0.0890945	0.0115888	-0.0811369	0.0326428	-0.0484712
635938	c1cc(c(cc1Cl)C=O)O	5-Chlorosalicylaldehyde	5.31	0	0.821	0.674041	42.3513	0	0	6	0	2	0	0	0	1	0	0	1	2783.57	0	125.635	102.056	85.0232	102.563	17.6256	0	0	168.799	125.144	79.4195	0	8.34367	8.12795	8.38269	8.45171	8.39894	0	156.747	142.529	151.847	163.094	0.347269	-0.147926	-0.00329008	-0.0428761	-0.0221576	0.0831762	-0.0405609
14064109	O=C(OCC)C(C(=O)OCC)Cl	Diethyl chloromalonate	5.31	0	1.1104	1.23299	41.5028	0	0	0	0	4	0	0	0	1	0	0	1	3301.6	269.399	104.046	105.515	108.808	67.5826	43.067	29.4711	17.96	206.928	161.054	126.337	127.23	8.35518	8.62399	8.78634	8.2189	8.40339	8.73364	166.592	148.073	170.424	158.068	0.616393	-0.254212	-0.0705058	-0.249342	0.396965	-0.0348674	-0.0466706
2402791	c1(c(nc(c(c1)Cl)Cl)Cl)Cl	2,3,5,6-Tetrachloropyridine	5.34	0	2.6882	7.22642	46.5816	0	0	6	1	0	0	0	0	4	0	0	4	5945.34	0	238.982	389.041	478.017	1256.7	0	0	0	354.802	503.971	0	0	9.35683	9.39442	9.84599	12.0756	0	0	154.797	142.881	156.797	163.413	0.199586	-0.104595	-0.0132479	0.0640596	-0.0727687	0.0267592	0
56207397	c1(c(c(c([N+](=O)[O-])cc1)N)C)[N+](=O)[O-]	Benzenamine, 3,6-dinitro-2-methyl- (9CI)	5.34	0	1.0797	1.16575	45.223	0	0	6	3	4	0	0	0	0	0	0	0	2629.42	0	119.035	102.551	78.8473	47.6454	55.9338	255.968	0	175.892	113.455	99.6519	216.391	8.75355	8.23754	8.58796	8.53533	9.20987	13.3517	169.405	158.625	156.542	169.45	0.245598	-0.108961	-0.0466453	0.0584959	0.0699818	-0.0681277	-0.0917357
116063	CNC(=O)ON=CC(C)(C)SC	Aldicarb	5.34	0	1.2711	1.6157	49.2987	0	0	0	2	2	1	0	0	0	0	0	0	2956.25	495.44	99.5036	63.9815	40.6614	37.572	93.6478	46.4724	17.0841	116.447	108.142	190.181	142.577	7.79587	7.8599	7.76066	7.72175	8.10286	8.04368	168.351	151.901	155.848	171.516	0.357411	-0.257106	0.087726	0.064495	-0.010256	-0.17141	0.16972
29091052	c1(c(c(c(C(F)(F)F)cc1[N+](=O)[O-])N)[N+](=O)[O-])N(CC)CC	Dinitramine	5.35	0	1.8076	3.26742	68.3622	0	0	6	4	4	0	0	3	0	0	0	3	4491.59	1683.78	115.72	98.3185	102.161	85.2209	86.7236	33.9666	46.7716	206.873	170.989	141.734	104.995	8.92855	8.20659	8.63737	8.63353	9.26294	8.42223	179.888	159.514	165.18	168.947	0.608544	-0.274261	-0.0559821	-0.0285537	0.287888	-0.618483	0.509349
58902	c1(c(c(cc(c1Cl)Cl)Cl)O)Cl	2,3,4,6-Tetrachlorophenol	5.35	0	2.3151	5.35969	51.4261	0	0	6	0	1	0	0	0	4	0	0	4	6150.39	0	214.549	347.438	399.515	318.076	35.7336	0	0	299.66	205.058	125.161	0	9.25648	9.35042	9.68584	9.4373	9.0072	0	152.976	141.269	152.604	162.004	0.3118	-0.123983	-0.0822435	0.0557219	-0.0398404	0.0622051	-0.0277606
944229	P(=S)(Sc1ccccc1)(OCC)CC	Fonofos	5.35	0	2.1445	4.59888	72.3348	0	0	6	0	1	2	1	0	0	0	0	0	4728.91	344.16	164.364	92.9696	92.9771	62.7642	35.2976	17.6212	10.1223	212.272	184.151	138.431	101.771	7.35678	7.45657	7.55746	7.43924	7.21414	7.03265	156.958	139.978	153.994	145.401	0.187345	-0.0711769	0.00750859	-0.0276693	0.0068467	0.00232955	-0.022732
111831	C(CCCC)CCCBr	n-Octyl bromide	5.36	0	-0.7763	0.602642	36.6796	0	0	0	0	0	0	0	0	0	1	0	1	7556.04	1191.51	87.0159	34.5285	36.6396	39.5951	44.0284	51.4173	66.195	106.542	105.477	103.879	101.217	7.11154	7.02736	7.03406	7.04343	7.05748	7.0809	165.289	144.947	166.094	166.388	0.0559616	-0.00669273	-0.0238595	-0.000249	-1.75e-05	-8.02e-05	-0.000352
81196	c1(c(cccc1Cl)Cl)C(Cl)Cl	1,3-Dichloro-2-(dichloromethyl)benzene	5.38	0	3.1448	9.88977	54.55	0	0	6	0	0	0	0	0	4	0	0	4	6040.72	0	184.096	190.725	383.801	91.019	24.1611	0	0	293.76	163.883	93.802	0	8.53066	8.20439	9.07264	8.40001	8.24429	0	153.325	138.942	149.691	158.577	0.148698	-0.0518643	0.00887561	-0.106647	0.106146	-0.0186744	-0.0121852
143168	N(CCCCCC)CCCCCC	Dihexylamine	5.38	0	-2.5986	6.75272	47.8146	0	0	0	1	0	0	0	0	0	0	0	0	1954.8	1062.52	54.0518	20.3933	20.2512	20.0786	19.8647	18.9268	18.6407	101.642	100.547	99.1881	99.724	7.05216	7.04091	7.0461	7.05241	7.06024	7.06811	168.139	148.054	167.972	168.325	0.165683	-0.043843	-0.0536538	0.00858093	0.00240792	0.00205346	0.0123039
22936863	CC(C)Nc1nc(nc(n1)Cl)NC2CC2	Cyprazine	5.38	0	-1.3905	1.93349	53.5518	0	0	6	5	0	0	0	0	1	0	0	1	3550.28	757.732	100.1	61.6689	77.2086	71.3045	85.4439	30.7488	26.1287	156.134	190.741	190.311	129.419	7.75886	7.70399	7.72079	8.1743	7.86457	8.14176	170.84	154.978	172.247	172.06	0.443675	-0.457714	0.549974	-0.586241	0.471728	-0.281056	0.182597
58138082	c1c([C@@]2(CC(Cl)(Cl)Cl)CO2)cc(Cl)cc1Cl	Tridiphane	5.39	0	2.918	8.51472	71.653	0	0	6	0	1	0	0	0	5	0	0	5	7989.23	107.201	168.361	116.882	180.724	149.741	137.987	630.983	35.7336	245.242	222.484	221.406	332.063	8.52888	8.21919	8.27377	8.29805	8.73857	9.64802	156.027	140.691	152.258	155.515	0.33984	-0.158544	0.078439	-0.179674	0.0620778	0.163851	-0.238927
10222012	C(C(N)=O)(C#N)(Br)Br	2,2-Dibromo-3-nitrilopropionamide	5.39	0	0.9103	0.828646	33.7783	0	0	0	2	1	0	0	0	0	2	0	2	13852.5	0	307.207	586.057	95.8351	14.1191	0	0	0	161.714	86.9662	0	0	9.05374	9.64641	8.6853	8.27885	0	0	163.728	155.065	166.604	169.751	0.44649	-0.175318	-0.111902	-0.00889153	0.13837	-0.0655032	0
100254	c1([N+](=O)[O-])ccc([N+](=O)[O-])cc1	1,4-Dinitrobenzene	5.39	0	1.83	3.3489	37.3912	0	0	6	2	4	0	0	0	0	0	0	0	2285.91	0	134.18	96.4973	75.3479	73.06	224.098	255.968	0	163.891	144.834	229.458	216.391	9.12044	8.32651	8.87874	9.3029	11.6709	13.3517	166.545	155.767	160.246	171.73	0.12258	-0.0348051	-0.0264908	0.0885986	-0.00632142	-0.11802	-0.0284779
634902	c1(c(cc(Cl)cc1Cl)Cl)Cl	1,2,3,5-Tetrachlorobenzene	5.39	0	2.8782	8.28404	49.8206	0	0	6	0	0	0	0	0	4	0	0	4	5894.43	0	216.08	311.613	464.164	442.723	0	0	0	322.565	251.431	0	0	8.91521	8.93385	9.44703	10.03	0	0	150.27	137.591	152.51	161.033	0.115905	-0.0316284	-0.00461277	-0.0491474	0.0279626	-0.000526	0
145733	OC(=O)[C@H]1[C@@H]2CC[C@@H](O2)[C@H]1C(=O)O	Endothal	5.39	2	-1.5999	2.55968	35.9199	0	0	0	0	5	0	0	0	0	0	0	0	2444.11	0	101.509	53.5431	71.8965	53.6876	11.1917	1.01606	0	149.842	115.518	70.007	31.0837	8.44641	7.99223	8.47065	8.77657	8.41	6.71846	164.817	147.073	161.754	166.743	0.778235	-0.440875	0.245161	-0.389257	0.11417	0.298138	-0.291072
57055386	CC(C)c1ccc2c(c1)CC[C@@H]3[C@@]2(CCC[C@@]3(C(=O)OC)Cl)C	Chlorodehydroabietic acid	5.41	0	2.446	5.98292	94.7118	0	0	6	0	2	0	0	0	1	0	0	1	4681.35	2593.03	83.8215	67.9059	52.0091	38.6314	32.6154	32.9357	25.6736	169.105	141.543	123.097	128.729	7.41976	7.43895	7.44568	7.42325	7.34051	7.22809	161.355	142.366	151.654	156.217	0.373226	-0.16592	-0.0830717	0.131719	-0.0502025	-0.0119552	-0.0322855
1563662	c12c(CC(O2)(C)C)cccc1OC(NC)=O	Carbofuran	5.42	0	1.0937	1.19618	63.0223	0	0	6	1	3	0	0	0	0	0	0	0	2710.51	645.6	91.3611	61.6247	47.6301	65.6608	41.0825	31.306	18.9882	148.258	190.761	142.166	116.753	7.79097	7.96604	7.64497	7.95153	7.72663	7.56816	163.319	146.979	156.267	163.936	0.497298	-0.383238	0.217226	0.00905737	-0.195479	0.204554	-0.102457
6639301	c1(c(cc(Cl)c(c1)Cl)Cl)C	2,4,5-Trichlorotoluene	5.42	0	2.9559	8.73734	49.3864	0	0	6	0	0	0	0	0	3	0	0	3	4785.04	0	156.517	192.553	142.939	152.507	35.7336	0	0	193.847	150.833	125.161	0	8.17352	8.21816	8.16845	8.07219	9.0072	0	154.442	139.415	149.542	161.247	0.0890895	-0.0364199	-0.00137518	0.00535665	-0.0302595	0.0288949	-0.0107416
18172673	C1([C@@H]2C(=C)CC[C@@H]1C2)(C)C	(-)-beta-Pinene	5.43	0	1.3695	1.87553	43.3169	0	0	0	0	0	0	0	0	0	0	0	0	1458.9	0	65.9488	34.4284	15.1129	5.19793	1.01606	0	0	97.8676	62.625	31.0837	0	7.03464	7.13855	6.97676	6.86897	6.71846	0	162.563	142.396	152.785	164.766	0.0452026	-0.00729981	0.00354674	-0.0155173	-0.0176918	-0.0127567	0.0271175
29590429	CC(C)CCCCCOC(=O)C=C	Isooctyl acrylate	5.44	0	0.4858	0.236002	48.5304	0	0	0	0	2	0	0	0	0	0	0	0	2119.16	1013.38	66.1566	30.1734	24.0197	26.6708	25.6298	27.2504	25.9842	106.375	116.19	110.9	108.884	7.3945	7.29738	7.29263	7.24995	7.25414	7.3071	165.576	145.738	163.274	168.321	0.304609	-0.190583	0.0526206	0.0491314	-0.077979	0.00064	0.000609
79958	C(c1cc(c(O)c(c1)Cl)Cl)(c1cc(c(O)c(c1)Cl)Cl)(C)C	2,2',6,6'-Tetrachlorobisphenol A	5.44	0	3.6784	13.5306	95.1719	0	0	12	0	2	0	0	0	4	0	0	4	7714.9	7768.02	133.795	133.842	103.786	86.1333	95.02	116.359	235.395	205.932	184.582	202.123	211.604	8.14349	8.0419	7.71268	7.51371	8.28473	8.77227	156.499	141.796	147.222	153.882	0.517957	-0.270533	-0.114875	0.259197	-0.226922	0.0904766	0.196022
84742	CCCCOC(=O)c1ccccc1C(=O)OCCCC	Dibutyl phthalate	5.45	0	-0.1962	0.0384944	73.9672	0	0	6	0	4	0	0	0	0	0	0	0	3354.45	2840.85	81.8818	51.7107	58.6968	63.2292	55.0238	41.2609	36.4212	159.651	170.483	186.126	155.529	7.66336	7.52575	7.93565	8.25801	7.71542	7.67716	162.826	144.378	161.165	162.71	0.582105	-0.34095	0.0470211	0.0795402	-0.246016	0.288491	-0.0412108
528290	c1(c(cccc1)[N+](=O)[O-])[N+](=O)[O-]	1,2-Dinitrobenzene	5.45	0	1.83	3.3489	37.3912	0	0	6	2	4	0	0	0	0	0	0	0	2285.91	0	134.18	102.324	105.058	102.674	16.127	0	0	184.954	154.611	82.0136	0	9.12044	8.33901	9.19298	10.1362	9.47117	0	166.545	155.767	160.277	173.55	0.144989	7.11e-05	-0.055201	-0.0417401	0.0141605	0.0416691	-0.0314541
111319	C(CCC)CCS	1-Hexanethiol	5.47	0	-0.5781	0.3342	30.9489	0	0	0	0	0	1	0	0	0	0	0	0	1907.65	3.04819	64.8051	23.4336	23.7963	24.3766	25.4543	9.76542	1.01606	98.722	94.7786	87.4552	64.3335	7.04978	6.98815	6.98836	6.98871	6.98935	6.98825	164.616	144.105	166.105	166.515	0.067561	-0.0205512	-0.0191474	0.00280109	6.51e-05	0.000322	0.0041447
2475469	c12c(C(c3ccccc3C2=O)=O)c(ccc1NCCO)NC	C.I. Disperse Blue 3	5.47	0	-0.5724	0.327642	90.6643	0	0	12	2	3	0	0	0	0	0	0	0	3629.04	2121.52	97.5923	79.6363	81.5252	69.744	54.3096	44.8088	30.7466	221.225	196.897	174.855	153.604	7.79323	7.71719	7.87896	7.88793	7.83362	7.78536	160.343	146.031	154.782	153.798	0.708668	-0.274294	-0.144587	-0.0361548	-0.0665656	0.464834	-0.255885
13411160	c1cc(nc(c1)/C=C/c2ccc(o2)[N+](=O)[O-])CO	Nifurpirinol	5.48	0	1.193	1.42325	67.528	0	0	11	2	4	0	0	0	0	0	0	0	3157.59	2380.81	111.772	77.3104	67.8366	64.0633	64.5325	70.4892	82.0968	193.253	181.036	177.814	187.293	8.26718	8.0909	7.92557	7.81828	7.942	8.00104	161.964	148.444	160.989	158.244	0.503016	-0.246492	-0.0618645	0.169972	-0.185235	0.158566	-0.105861
84695	CC(C)COC(=O)c1ccccc1C(=O)OCC(C)C	Diisobutyl phthalate	5.49	0	1.999	3.996	79.059	0	0	6	0	4	0	0	0	0	0	0	0	3354.45	3117.29	81.8818	54.0855	47.6751	80.285	50.684	44.5001	34.6366	133.987	207.159	180.065	167.642	7.66336	7.58027	7.84272	8.34498	7.854	7.52312	162.826	144.378	156.944	169.732	0.581405	-0.346016	0.0478258	0.127584	-0.369505	0.443793	-0.143887
3126907	c1(cc(C(OCCCC)=O)ccc1)C(OCCCC)=O	Dibutyl isophthalate	5.49	0	-0.1962	0.0384944	73.9672	0	0	6	0	4	0	0	0	0	0	0	0	3354.45	2648.16	81.8818	50.4089	51.9168	58.5655	58.1245	42.6229	36.2762	152.003	171.634	176.127	159.975	7.66336	7.5255	7.90975	7.99084	7.8871	7.47973	162.826	144.378	161.106	164.254	0.576385	-0.355517	0.0261972	0.182014	-0.0468415	-0.347314	0.354372
818724	C([C@@H](C#C)O)CCCC	1-Octyn-3-ol	5.49	0	-0.8465	0.716562	31.2718	0	0	0	0	1	0	0	0	0	0	0	0	1424.31	53.5087	62.5242	27.4153	23.1944	22.8103	23.9337	15.806	5.94541	108.987	104.65	104.969	93.9056	7.2928	7.19978	7.20642	7.17455	7.25389	7.37815	164.724	146.213	164.673	166.062	0.262683	-0.135288	-0.00705685	0.0441034	-0.0642607	0.028884	0.0166495
1746232	c1(ccc(C=C)cc1)C(C)(C)C	4-tert-Butylstyrene	5.52	0	3.2759	10.7315	57.7896	0	0	6	0	0	0	0	0	0	0	0	0	1747.43	190.751	68.7458	43.365	24.1781	18.1138	19.5972	35.4289	7.94795	120.842	104.558	98.8092	169.227	7.07077	7.19419	7.01707	6.98434	6.93105	7.19226	160.008	141.839	148.804	162.041	0.0680705	-0.0160868	0.0095981	-0.0138831	-0.0364245	-0.00678931	0.0408677
90595	c1(c(c(cc(c1)Br)Br)O)C=O	3,5-Dibromosalicylaldehyde	5.52	0	1.3577	1.84335	52.7035	0	0	6	0	2	0	0	0	0	2	0	2	14295.1	0	224.405	264.816	476.338	308.889	32.5621	0	0	240.666	174.017	86.988	0	8.47232	8.29931	8.59175	8.6665	8.17776	0	151.818	140.324	146.434	157.793	0.35179	-0.14488	-0.0358887	0.0127195	-0.0533425	0.0797812	-0.0342845
88857	c1(c(c(cc(c1)[N+](=O)[O-])[N+](=O)[O-])O)[C@@H](CC)C	Dinoseb	5.54	0	0.968	0.937024	55.1222	0	0	6	2	5	0	0	0	0	0	0	0	3127.07	196.572	104.034	77.0274	67.7591	63.9275	67.2159	28.7437	13.1048	170.735	151.234	139.442	96.4689	8.38581	7.85183	8.13325	8.11043	8.69807	8.64529	166.782	152.063	157.545	162.121	0.32501	-0.123387	-0.0291198	0.0422453	-0.094529	-0.0713334	0.202412
5835267	C[C@@]1(CC[C@H]2C(=CC[C@@H]3[C@@]2(CCC[C@@]3(C)C(=O)O)C)C1)C=C	Isopimaric acid	5.54	1	1.9681	3.87342	89.8182	0	0	0	0	2	0	0	0	0	0	0	0	3427.7	2093.58	72.6921	49.1482	33.1463	26.0301	22.2292	25.6196	21.1473	140.222	116.29	102.467	115.692	7.28976	7.29102	7.26708	7.18534	7.20028	7.18724	162.583	142.998	150.81	159.507	0.384927	-0.23879	0.08624	0.0159178	-0.0889683	0.0537373	-0.0459828
3252435	C(C#N)(Br)Br	Dibromoacetonitrile	5.56	0	1.6627	2.76457	27.232	0	0	0	1	0	0	0	0	0	2	0	2	13255	0	448.813	750.85	0	0	0	0	0	0	0	0	0	8.78751	9.61394	0	0	0	0	154.813	141.926	180.349	0	0.168214	-0.0319629	-0.0826689	0.0305249	0	0	0
105759	C(\C=C\C(OCCCC)=O)(OCCCC)=O	Dibutyl fumarate	5.56	0	-0.954	0.910116	55.62	0	0	0	0	4	0	0	0	0	0	0	0	2775.36	1678.6	76.9572	39.4239	43.3164	52.3849	51.2513	39.6288	39.9667	134.296	143.079	162.139	138.584	7.72951	7.55898	7.81652	8.03371	7.68841	8.00611	165.603	146.39	166.228	166.22	0.549281	-0.34996	0.161248	0.0483535	-0.415061	0.346548	0.0410737
19398131	CCCCOCCOC(=O)C(C)Oc1cc(c(cc1Cl)Cl)Cl	Fenoprop-butotyl	5.57	0	1.0677	1.13998	89.042	0	0	6	0	4	0	0	0	3	0	0	3	6977.25	4308.27	111.798	98.0817	91.2896	85.5263	73.0375	73.2008	75.5837	179.938	170.661	159.043	156.451	8.05835	8.16183	8.06334	7.94552	7.93427	7.97546	162.479	144.935	163.354	161.021	0.678475	-0.270125	-0.218364	0.318519	-0.22217	-0.00190254	0.116083
115866	P(Oc1ccccc1)(Oc1ccccc1)(Oc1ccccc1)=O	Triphenyl phosphate	5.57	0	2.7711	7.679	101.859	0	0	18	0	4	0	1	0	0	0	0	0	4595.24	4128.31	133.426	88.2713	104.033	103.61	86.6826	65.4523	45.8702	203.589	223.72	244.707	234.322	7.79575	7.83061	8.08836	8.63838	8.28374	7.56921	155.469	140.26	154.79	156.401	0.570542	-0.542105	0.459985	-0.279008	0.155039	0.0107122	-0.0285013
609234	c1(c(cc(I)cc1I)I)O	2,4,6-Triiodophenol	5.59	0	1.6878	2.84867	69.5198	0	0	6	0	1	0	0	0	0	0	3	3	49438.8	0	436.218	635.114	3338.54	383.387	127.92	0	0	406.154	169.628	181.28	0	7.83862	7.8378	7.78771	7.51775	7.20058	0	140.666	135.276	137.611	142.881	0.204624	-0.116678	-0.00736571	0.0595271	-0.0697039	0.0412539	-0.00934599
117817	CCCCC(CC)COC(=O)c1ccccc1C(=O)OCC(CC)CCCC	Bis(2-ethylhexyl)phthalate	5.59	0	-0.7706	0.593824	106.097	0	0	6	0	4	0	0	0	0	0	0	0	4524.82	6443.47	72.5282	42.9592	42.3763	43.6626	41.3172	37.773	42.9564	139.46	139.734	150.105	144.019	7.41941	7.32205	7.55089	7.63556	7.50877	7.52393	163.814	144.367	160.299	163.185	0.616395	-0.345504	0.0210131	0.116753	-0.303201	0.324492	-0.0312125
2437254	C(CCCCCC)CCCCC#N	Dodecanenitrile	5.63	0	-2.4712	6.10683	42.8509	0	0	0	1	0	0	0	0	0	0	0	0	1950.73	1025.92	58.103	21.6097	21.5827	21.5492	21.5066	21.4505	21.3733	108.096	107.643	107.067	106.31	7.08924	7.02103	7.02466	7.02915	7.03487	7.0424	166.274	145.149	166.004	166.184	0.131079	-0.026838	-0.0290211	-0.0116951	-0.000794	-2.61e-05	-9.09e-07
39515510	c1(Oc2ccccc2)cc(ccc1)C=O	3-Phenoxybenzaldehyde	5.63	0	1.3711	1.87992	67.2599	0	0	12	0	2	0	0	0	0	0	0	0	2397.53	846.417	98.9614	64.4223	57.7884	66.5	54.7598	46.0605	33.8567	178.43	209.464	197.819	168.698	7.67659	7.70946	7.72132	7.7535	7.3383	7.30434	154.736	139.984	153.211	157.909	0.289778	-0.0971487	-0.0225546	-0.00526512	-0.0585359	0.0478367	-0.0296443
1825214	c1(c(c(c(Cl)c(c1Cl)Cl)Cl)Cl)OC	Pentachloroanisole	5.63	0	2.7483	7.55315	61.1803	0	0	6	0	1	0	0	0	5	0	0	5	7552.38	0	213.449	444.654	440.682	242.414	67.6513	35.7336	0	352.205	229.171	155.717	125.161	9.1668	9.54787	9.46886	8.90128	8.49384	9.0072	154.285	141.057	149.463	153.347	0.307063	-0.033952	-0.19328	-0.0182445	0.0675424	0.0700058	-0.0254887
120627	c12c(ccc(c1)C[C@@H]([S@@](CCCCCCCC)=O)C)OCO2	Piperonyl sulfoxide	5.64	0	-2.1115	4.45843	87.2709	0	0	6	0	3	1	0	0	0	0	0	0	4420.95	3572.94	92.1363	45.2866	40.6196	39.6583	41.8364	43.7524	38.01	139.65	134.763	134.375	133.685	7.45291	7.36768	7.37539	7.28056	7.36233	7.41327	162.474	143.214	158.514	161.192	0.394941	-0.149001	-0.0611316	0.0338298	-0.0272578	0.0081511	-0.0468544
101553	c1(Oc2ccccc2)ccc(Br)cc1	p-Bromophenyl phenyl ether	5.64	0	2.2118	4.89206	69.7203	0	0	12	0	1	0	0	0	0	1	0	1	8380.93	2303.54	132.675	99.5732	80.2014	103.089	77.4575	95.5049	135.503	190.035	221.732	200.293	165.738	7.59418	7.7439	7.68453	7.46157	7.23457	7.18698	152.644	139.14	153.807	156.006	0.176588	-0.0812353	0.0363673	-0.0115217	-0.0785127	0.0443707	-0.0175564
4097498	c1(c(c(cc(c1)C(C)(C)C)[N+](=O)[O-])O)[N+](=O)[O-]	4-tert-Butyl-2,6-dinitrophenol	5.65	0	2.6275	6.90376	56.9034	0	0	6	2	5	0	0	0	0	0	0	0	3127.07	9.14458	104.034	79.4012	57.5819	65.8387	85.2167	15.8757	1.01606	144.17	151.383	165.634	84.0588	8.38581	7.92787	7.89411	8.00419	9.05873	9.32407	166.782	152.063	152.082	166.818	0.339426	-0.112593	-0.0778383	-0.0165481	0.0200198	-0.0352056	0.227584
23184669	c1(N(COCCCC)C(=O)CCl)c(cccc1CC)CC	Butachlor	5.65	0	0.4252	0.180795	88.4505	0	0	6	1	2	0	0	0	1	0	0	1	4443.74	2950.47	81.7336	59.6165	59.7496	55.6845	47.0756	33.6534	28.6453	178.213	165.771	144.874	116.427	7.48616	7.51189	7.61555	7.60759	7.56433	7.48401	164.121	145.816	160.045	158.791	0.433211	-0.162443	-0.042873	-0.0305307	-0.00254717	0.0454363	0.029612
542756	C(\CCl)=C\Cl	1,3-Dichloropropene	5.67	0	1.5182	2.30493	25.2766	0	0	0	0	0	0	0	0	2	0	0	2	2950.26	0	148.567	96.2417	227.656	0	0	0	0	156.937	0	0	0	8.18296	7.86074	8.75569	0	0	0	161.819	144.765	165.884	177.836	0.0722854	-0.0136302	-0.0128869	-0.013042	0.00341648	0	0
61788327	C1CC=CC(C1)c2ccc(cc2)C3CCC=CC3	Dodecahydroterphenyl	5.67	0	2.4042	5.78018	81.1127	0	0	6	0	0	0	0	0	0	0	0	0	2619.11	1782.74	75.039	38.499	32.9092	31.4954	28.958	31.9435	35.6548	146.543	140.394	134.612	141.494	7.08839	7.10875	7.0784	7.05595	7.04875	7.05771	158.762	140.585	155.458	157.585	0.0971255	-0.00162504	-0.0377941	-0.00774634	-0.00485996	-0.00193038	-0.0141371
1962750	c1(C(OCCCC)=O)ccc(C(OCCCC)=O)cc1	Dibutyl terephthalate	5.67	0	-0.1962	0.0384944	73.9672	0	0	6	0	4	0	0	0	0	0	0	0	3354.45	2374.88	81.8818	50.4089	50.5091	50.3531	52.6317	45.5514	37.1075	149.385	162.37	177.755	150.531	7.66336	7.5255	7.90948	7.95947	7.56752	7.64187	162.826	144.378	161.106	164.191	0.575777	-0.358096	0.0147654	0.165972	0.0391283	-0.152585	-0.265572
5598130	P(=S)(Oc1c(cc(c(n1)Cl)Cl)Cl)(OC)OC	Chlorpyrifos-methyl	5.68	0	3.2076	10.2887	70.8383	0	0	6	1	3	1	1	0	3	0	0	3	7738.39	1144.72	231.818	257.597	197.137	263.503	156.702	140.551	57.236	240.796	277.091	196.588	197.674	8.75503	8.82134	9.1277	8.56728	8.14316	8.27876	159.624	145.283	149.552	161.157	0.561768	-0.401096	0.23472	-0.0423581	-0.175023	0.106643	-0.0782571
1647161	C(CCCC=C)CCC=C	1,9-Decadiene	5.68	0	0.7742	0.599386	40.8444	0	0	0	0	0	0	0	0	0	0	0	0	1460.93	421.792	56.1594	21.5617	20.147	19.8444	19.412	18.7439	17.5747	106.577	105.643	104.31	102.249	7.01205	6.99122	6.97364	6.97125	6.96783	6.96254	164.159	144.346	163.984	165.327	0.0778078	-0.0107989	-0.0369983	0.00348172	0.00254492	0.0003	-0.00135779
7785708	C=1(C)[C@@H]2C([C@@H](CC1)C2)(C)C	alpha-Pinene, (+)-	5.69	0	1.5162	2.29886	44.5386	0	0	0	0	0	0	0	0	0	0	0	0	1458.9	0	65.9488	35.7203	15.4058	5.1752	1.01606	0	0	99.6169	62.4536	31.0837	0	7.03464	7.15103	6.98441	6.86815	6.71846	0	162.563	142.396	151.849	164.162	0.0403692	-0.00239778	0.0019907	-0.0211845	-0.0138045	-0.00702601	0.0222376
30030252	c1(ccccc1)CCl.[*]C=C	Benzene, (chloromethyl)ethenyl-	5.69	0	1.9637	3.85612	40.0635	0	0	6	0	0	0	0	0	1	0	0	1	2273.66	0	101.359	65.5807	50.3591	44.9729	12.5886	0	0	129.525	103.586	62.4429	0	7.45923	7.31642	7.36172	7.43504	7.48138	0	156.676	140.363	152.431	163.967	0.0779396	-0.00713451	-0.0384175	-0.002068	0.00352527	0.008726	-0.00360106
563122	P(=S)(SCSP(=S)(OCC)OCC)(OCC)OCC	Ethion	5.73	0	4.1335	17.0858	95.0817	0	0	0	0	4	4	2	0	0	0	0	0	8374.72	4564.17	208.412	131.316	151.515	101.568	89.9731	56.2222	65.2024	228.387	192.778	155.975	125.381	7.72448	7.7374	8.22502	7.85722	7.55847	7.21249	160.985	143.209	159.089	146.413	0.577469	-0.374118	0.271335	-0.136147	-0.0273336	-0.355689	0.510245
2176627	c1(c(c(nc(c1Cl)Cl)Cl)Cl)Cl	Pentachloropyridine	5.73	0	3.0569	9.34464	51.2978	0	0	6	1	0	0	0	0	5	0	0	5	7201.03	0	276.589	581.352	802.946	1256.7	0	0	0	468.227	503.971	0	0	9.84385	10.0407	10.8412	12.0756	0	0	153.274	142.236	154.999	160.576	0.240552	-0.0794284	-0.0548326	-0.0143005	0.00198118	0.0263041	0
593088	C(CCCCCCCC)CCC(C)=O	2-Tridecanone	5.74	0	-2.7598	7.6165	47.4227	0	0	0	0	1	0	0	0	0	0	0	0	2157.82	1264.76	57.3876	22.4591	21.3728	21.3222	21.2599	21.1814	21.0793	106.62	106.078	105.41	104.568	7.15146	7.13869	7.05373	7.06062	7.06909	7.07977	166.041	145.027	165.207	165.897	0.155561	-0.0429099	-0.00557817	-0.0339545	0.00171662	0.000107	3.07e-06
4901513	c1(c(c(cc(c1Cl)Cl)O)Cl)Cl	2,3,4,5-Tetrachlorophenol	5.75	0	2.3151	5.35969	51.4261	0	0	6	0	1	0	0	0	4	0	0	4	6150.39	0	214.549	376.565	355.475	323.862	35.7336	0	0	285.619	220.738	125.161	0	9.25648	9.34355	9.55267	9.81875	9.0072	0	152.976	141.269	152.622	162.514	0.31148	-0.117839	-0.0626578	-0.0375022	0.0651575	0.0244205	-0.027319
57055397	CC(C)c1ccc2c(c1)CC[C@@H]3[C@@]2(CCC([C@@]3(C(=O)OC)Cl)Cl)C	Dichlorodehydroabietic acid	5.76	0	2.8843	8.31919	99.2735	0	0	6	0	2	0	0	0	2	0	0	2	5937.04	3076.15	91.777	85.6083	63.37	47.9011	39.6542	40.5647	30.457	177.335	150.023	132.314	135.708	7.5269	7.54329	7.54718	7.50001	7.48802	7.29126	161.019	142.23	151.327	155.898	0.417184	-0.155729	-0.107096	0.0449308	0.0298609	0.0106504	-0.062398
55792615	CCCCCCCCOc1ccccc1NC(=O)C	2'-(Octyloxy)-acetanilide	5.77	0	-1.9343	3.74152	72.1767	0	0	6	1	2	0	0	0	0	0	0	0	3041.76	2180	73.5762	38.9504	38.9091	39.3509	31.5751	28.3519	29.0666	140.207	142.409	129.186	122.092	7.39807	7.44183	7.37229	7.40667	7.3479	7.27352	164.404	146.251	164.287	162.882	0.387388	-0.195978	0.0480251	0.0315058	-0.15825	0.0965785	-0.0123898
128370	c1(c(O)c(C(C)(C)C)cc(c1)C)C(C)(C)C	Butylated hydroxytoluene	5.78	0	4.0079	16.0633	72.6567	0	0	6	0	1	0	0	0	0	0	0	0	2444.32	82.3012	66.2679	48.9021	33.0276	33.8136	21.2982	5.65882	1.01606	126.749	146.124	125.517	66.1012	7.19256	7.3339	7.17667	7.52221	7.15141	6.88556	163.135	144.057	147.312	163.906	0.232583	-0.130499	0.0441626	-0.0340422	0.117896	-0.158538	-0.010307
115322	C(c1ccc(Cl)cc1)(c1ccc(Cl)cc1)(C(Cl)(Cl)Cl)O	Dicofol	5.79	0	4.096	16.7772	94.7104	0	0	12	0	1	0	0	0	5	0	0	5	8568.32	2042.85	153.269	147.731	131.813	122.502	124.159	279.036	120.168	249.159	229.569	215.249	234.492	8.2677	8.12105	8.13983	8.14192	8.12232	8.27664	153.987	139.851	149.28	152.429	0.440519	-0.23976	-0.12839	0.238224	-0.00691304	-0.0854047	-0.0709633
1871574	C(CCl)(CCl)=C	3-Chloro-2-chloromethyl-1-propene	5.82	0	2.0237	4.09536	29.5827	0	0	0	0	0	0	0	0	2	0	0	2	3096.56	0	123.365	115.528	74.0364	0	0	0	0	89.4412	0	0	0	7.88534	7.72381	7.84547	0	0	0	162.75	144.651	151.347	180.852	0.0954554	-0.0204453	-0.0363787	0.018282	-0.00918568	0	0
95943	c1(c(cc(Cl)c(c1)Cl)Cl)Cl	1,2,4,5-Tetrachlorobenzene	5.83	0	2.8782	8.28404	49.8206	0	0	6	0	0	0	0	0	4	0	0	4	5894.43	0	216.08	311.613	365.309	838.14	0	0	0	298.837	346.342	0	0	8.91521	8.93385	9.38206	10.2899	0	0	150.27	137.591	152.51	161	0.113445	-0.0356496	-0.00388498	-0.0013056	-0.0528375	0.0369552	0
69770236	C(c1ccc(Oc2cc(C=O)ccc2)cc1)(C)(C)C	3-(4-tert-Butylphenoxy)benzaldehyde	5.84	0	2.7317	7.46218	85.1666	0	0	12	0	2	0	0	0	0	0	0	0	2982.72	2107.46	85.445	56.6275	38.422	40.2366	42.1521	52.6406	52.6865	143.179	150.965	148.984	182.376	7.45472	7.52453	7.31113	7.32353	7.2659	7.78288	158.241	141.362	149.872	161.253	0.297788	-0.105022	0.00684499	-0.0221933	-0.0988652	0.050476	0.0615925
35367385	c1(C(=O)NC(=O)Nc2ccc(cc2)Cl)c(cccc1F)F	Diflubenzuron	5.86	0	1.6015	2.5648	79.8751	0	0	12	2	2	0	0	2	1	0	0	3	4911.75	3182.58	126.706	100.038	108.019	89.9876	107.02	105.393	99.4557	198.742	197.217	212.473	220.289	8.57386	8.36905	8.78522	8.59224	8.66953	8.46602	166.934	148.877	163.354	172.324	0.595383	-0.392387	0.400946	-0.639109	0.538565	-0.335207	0.159126
33878501	CCOC(=O)[C@H](C)N(C(=O)c1ccccc1)c2ccc(Cl)c(Cl)c2	Benzoylprop-ethyl	5.9	0	2.4228	5.86996	102.397	1	1	12	1	3	0	0	0	2	0	0	2	6091.53	6015.52	110.452	99.4499	85.8982	82.5878	76.8607	75.5101	68.3582	215.413	211.885	194.215	174.739	7.91101	7.96046	8.12448	8.03277	7.74502	7.77185	159.264	143.528	158.379	156.308	0.554291	-0.314223	0.00301715	0.171505	-0.204243	0.157298	-0.134498
95318	c12c(sc(n1)SNC(C)(C)C)cccc2	2-(tert-Butylaminothio)benzothiazole	5.9	0	2.8573	8.16416	74.1984	0	0	9	2	0	2	0	0	0	0	0	0	4049.21	1182.4	119.296	83.3213	48.2774	110.819	59.5763	42.6688	34.7765	127.465	232.8	197.484	180.836	7.41018	7.59685	7.22338	7.66848	7.867	7.26196	159.335	144.03	156.266	166.449	0.208785	-0.121426	0.0278085	0.00935304	-0.060065	0.117858	-0.0979227
7307553	NCCCCCCCCCCC	Undecylamine	5.91	0	-3.279	10.7518	41.0374	0	0	0	1	0	0	0	0	0	0	0	0	1808.5	885.721	53.2661	19.474	19.227	18.923	18.5396	18.0413	17.3671	100.929	99.6675	98.0763	96.0077	7.057	7.00302	7.00465	7.00666	7.0092	7.0125	168.349	148.575	167.201	167.498	0.183447	-0.0798106	-0.0249792	0.00941014	0.000813	2.76e-05	-1.56e-07
82713	c1(c(c(cc(c1O)[N+](=O)[O-])[N+](=O)[O-])O)[N+](=O)[O-]	Styphnic acid	5.91	0	0.9171	0.841072	43.8199	0	0	6	3	8	0	0	0	0	0	0	0	3504.97	0	157.179	149.03	143.206	128.343	197.952	16.127	0	211.189	177.929	182.443	82.0136	10.1409	9.23608	10.0702	10.1217	12.1831	9.47117	171.642	163.474	160.042	172.906	0.585266	-0.169502	-0.110468	-0.0413795	0.185819	-0.475671	0.428968
3481207	c1(c(c(cc(c1Cl)Cl)Cl)Cl)N	2,3,5,6-Tetrachloroaniline	5.93	0	1.6815	2.82744	53.3704	0	0	6	1	0	0	0	0	4	0	0	4	6091.64	0	198.381	313.048	282.642	299.408	1.01606	0	0	260.097	202.781	31.0837	0	8.85019	8.94286	9.14605	9.18824	6.71846	0	157.1	146.922	154.421	164.233	0.240927	-0.112474	-0.0593364	0.0568804	0.0311171	-0.0529724	0.0163219
3309680	P(SCSCCC)(=S)(OCC)OCC	Phosphorodithioic acid, O,O-diethyl S-((propylthio)methyl)	5.93	0	2.435	5.92922	70.9738	0	0	0	0	2	3	1	0	0	0	0	0	5728.26	1005.97	166.368	97.0923	106.416	68.43	48.7515	32.6174	20.9577	188.233	177.025	138.185	116.347	7.49197	7.48165	7.82061	7.67885	7.37328	7.29996	161.535	143.002	159.939	152.012	0.326878	-0.195207	0.116649	-0.0766674	0.0123051	-0.0353151	-0.00548679
97234	c1(Cc2c(ccc(c2)Cl)O)c(ccc(c1)Cl)O	Dichlorophen	5.94	0	2.483	6.16529	76.7158	0	0	12	0	2	0	0	0	2	0	0	2	4910.94	2530.69	120.883	92.5491	73.5606	87.4631	104.005	114.123	105.445	186.714	188.503	220.988	197.695	8.00245	7.88632	7.86775	7.76904	8.05442	8.22818	155.731	141.757	150.104	157.564	0.444293	-0.255568	0.0854558	0.00509129	-0.211868	0.182506	0.0252461
137268	CN(C)C(=S)SSC(=S)N(C)C	Thiram	5.95	0	3.1558	9.95907	69.2408	0	0	0	2	0	4	0	0	0	0	0	0	5381.54	290.57	161.863	174.844	68.8159	154.351	117.926	40.5101	12.1071	149.734	246.533	233.592	156.144	7.55181	7.55946	7.42285	7.99857	7.64871	7.9101	159.649	147.538	141.913	154.738	0.189704	-0.0655464	-0.0831578	0.0791521	-0.0644191	0.0716903	0.0596512
79124768	C(c1cc(ccc1)Oc1cc(c(cc1)Cl)Cl)=O	3-(3,4-Dichlorophenoxy)benzaldehyde	5.95	0	2.1085	4.44577	76.6923	0	0	12	0	2	0	0	0	2	0	0	2	4908.9	2605.3	130.783	124.019	91.4829	95.8953	91.2612	99.9407	104.212	206.27	229.745	228.46	217.985	8.10516	8.10213	8.06092	7.98703	7.55225	7.75048	153.396	139.438	151.964	156.806	0.324424	-0.113806	-0.0151308	-0.0333353	-0.0687689	0.0855484	-0.022864
1241947	CCCCC(CC)COP(=O)(Oc1ccccc1)Oc2ccccc2	Octicizer	5.98	0	1.0142	1.0286	104.075	0	0	12	0	4	0	1	0	0	0	0	0	4895.96	5630.78	106.162	59.7729	63.4953	66.4368	58.9353	46.3134	42.9831	153.939	164.425	175.7	166.125	7.53733	7.48755	7.71669	7.90986	7.93793	7.61984	161.162	142.918	159.176	162.293	0.585543	-0.541768	0.431681	-0.178349	0.0155433	0.0596693	-0.00925557
13209159	BrC(Br)c1c(cccc1)C(Br)Br	1,2-Bis(dibromomethyl)benzene	5.99	0	4.2574	18.1255	70.5458	0	0	6	0	0	0	0	0	0	4	0	4	26698.8	0	281.426	272.863	341.694	1013.28	54.0342	0	0	269.968	247.224	108.939	0	7.89349	7.60125	7.80691	8.19035	7.80192	0	149.007	136.955	144.759	149.33	0.138808	-0.0519144	-0.0394061	0.0246613	-0.010819	0.0272531	-0.0191789
133073	c1ccc2c(c1)C(=O)N(C2=O)SC(Cl)(Cl)Cl	Folpet	6	0	3.9435	15.5512	69.4048	0	0	6	1	2	1	0	0	3	0	0	3	6808.52	214.402	192.136	167.503	165.907	261.494	211.741	199.525	35.7336	270.409	284.355	306.065	268.03	8.83071	8.32671	8.58944	9.50186	8.63156	8.96661	153.739	141.245	150.146	154.569	0.462061	-0.27606	0.0649255	0.0518833	-0.167507	0.0950113	-0.000638
33820530	c1(c(cc(C(C)C)cc1[N+](=O)[O-])[N+](=O)[O-])N(CCC)CCC	Isopropalin	6	0	1.3235	1.75165	79.7096	0	0	6	3	4	0	0	0	0	0	0	0	3799.79	1665.46	86.4773	59.9933	61.9249	65.1272	51.6686	31.7333	19.1432	171.491	174.423	142.135	118.644	7.81432	7.5605	7.73966	7.83343	8.17582	8.17932	167.345	150.67	161.203	163.411	0.242594	-0.0346213	-0.126775	-0.0218903	0.00930816	0.0602218	0.132394
79947	C(c1cc(c(O)c(c1)Br)Br)(c1cc(c(O)c(c1)Br)Br)(C)C	2,2',6,6'-Tetrabromobisphenol A	6	0	4.0144	16.1154	106.444	0	0	12	0	2	0	0	0	0	4	0	4	28226.7	30415.6	196.611	229.837	261.922	156.202	169.283	217.01	921.683	218.407	196.247	219.004	230.128	7.93578	7.88375	7.58682	7.39573	7.98544	8.53461	153.033	140.268	144.202	151.475	0.473396	-0.256511	-0.0846745	0.228516	-0.213228	0.0718558	0.179933
608935	c1(c(c(cc(c1Cl)Cl)Cl)Cl)Cl	Pentachlorobenzene	6.01	0	3.2469	10.5424	54.5368	0	0	6	0	0	0	0	0	5	0	0	5	7150.11	0	250.553	467.294	603.278	849.713	0	0	0	390.91	377.701	0	0	9.36164	9.45701	10.0955	11.0528	0	0	148.873	136.999	151.054	159.045	0.151152	-0.0189388	-0.0553065	-0.0251166	-3.4e-05	0.0238199	0
298022	P(=S)(SCSCC)(OCC)OCC	Phorate	6.02	0	3.0128	9.07696	67.4418	0	0	0	0	2	3	1	0	0	0	0	0	5581.96	547.943	177.769	106.043	121.162	64.3914	48.6556	20.3255	14.0498	204.36	170.221	143.506	101.127	7.54192	7.56827	7.95649	7.68728	7.42362	7.31333	161.134	142.863	159.123	149.201	0.32237	-0.194851	0.122732	-0.0867675	0.0206404	-0.0361384	0.0158002
299843	COP(=S)(OC)Oc1cc(c(cc1Cl)Cl)Cl	Ronnel	6.02	0	3.0677	9.41078	74.8251	0	0	6	0	3	1	1	0	3	0	0	3	7687.47	1144.72	220.665	226.502	178.448	233.021	148.978	115.181	57.236	236.937	260.266	196.663	167.385	8.55929	8.6097	8.88073	8.46715	7.91192	7.99507	157.16	142.538	147.275	157.347	0.478733	-0.322183	0.203073	0.000117	-0.279077	0.108029	0.00115011
87865	c1(c(c(c(Cl)c(c1Cl)Cl)Cl)Cl)O	Pentachlorophenol	6.04	0	2.6838	7.20278	56.1423	0	0	6	0	1	0	0	0	5	0	0	5	7406.08	0	246.371	489.581	536.121	527.357	35.7336	0	0	360.554	283.873	125.161	0	9.66857	9.82808	10.2308	10.3302	9.0072	0	151.687	140.722	151.275	160.512	0.350355	-0.104789	-0.127254	0.00752149	0.0278319	0.0488249	-0.0273133
2921882	CCOP(=S)(OCC)Oc1c(cc(c(n1)Cl)Cl)Cl	Chlorpyrifos	6.04	0	3.7084	13.7522	79.4259	0	0	6	1	3	1	1	0	3	0	0	3	8030.98	2580.16	195.475	183.632	206.34	183.774	136.805	93.7859	54.897	262.759	236.442	213.536	166.976	8.39036	8.42594	8.85012	8.71565	7.97871	7.75429	160.849	145.089	160.882	154.776	0.562905	-0.417601	0.283692	-0.131631	-0.0312135	-0.0178354	-0.0447744
3558698	n1c(c2ccccc2)cccc1c1ccccc1	2,6-Diphenylpyridine	6.04	0	2.6921	7.2474	85.9643	0	0	18	1	0	0	0	0	0	0	0	0	2661.89	1430.63	93.6552	61.6132	57.7044	58.7215	49.6961	42.8357	35.7657	199.698	207.42	192.806	174.504	7.28163	7.34232	7.38017	7.33852	7.2268	7.14019	153.893	139.4	152.124	154.816	0.161971	-0.0523842	-0.0350337	0.0366149	-0.00842391	-0.0159288	-0.0277375
3380345	c1(Oc2c(cc(Cl)cc2)Cl)c(cc(Cl)cc1)O	Triclosan	6.05	0	2.3021	5.29966	77.9402	0	0	12	0	2	0	0	0	3	0	0	3	6020.33	3809.39	146.952	132.752	144.447	125.768	122.187	99.6247	190.469	234.736	249.939	243.863	199.33	8.35191	8.44678	8.46457	8.08657	7.96428	7.90236	153.806	140.942	153.687	157.067	0.405638	-0.213038	-0.015606	0.128962	-0.188112	0.069745	0.0697985
2310170	CCOP(=S)(OCC)SCn1c2ccc(cc2oc1=O)Cl	Phosalone	6.06	0	2.4134	5.8245	87.9281	0	0	6	1	4	2	1	0	1	0	0	1	7238.24	4323.85	178.088	121.615	126.981	107.566	103.135	76.7212	70.8827	223.873	207.541	181.725	162.869	8.07667	7.98078	8.35543	8.07508	7.99037	7.63717	159.476	144.175	155.47	153.026	0.770182	-0.594177	0.421163	-0.225283	0.176745	-0.511188	0.42877
57067	C(N=C=S)C=C	Allyl isothiocyanate	6.06	0	0.7592	0.576385	30.105	0	0	0	1	0	1	0	0	0	0	0	0	1806.18	0	107.061	56.3143	58.0345	110.401	32.3165	0	0	146.514	217.102	136.199	0	7.51817	7.3064	7.41261	7.50493	7.66454	0	159.121	146.317	161.654	164.844	0.12584	-0.0614294	-0.0133135	0.0231162	-0.0238401	0.0155723	-0.00302528
143500	C12([C@@]3([C@@]4(C([C@@]5(Cl)C4(Cl)C(C3(Cl)[C@@]15Cl)=O)(Cl)C2(Cl)Cl)Cl)Cl)Cl	Chlordecone	6.07	0	4.4988	20.2392	83.1998	0	0	0	0	1	0	0	0	10	0	0	10	14265.6	0	258.79	547.023	827.941	940.899	567.165	0	0	462.871	455.304	330.234	0	9.97682	9.92746	11.0387	11.6245	12.6976	0	149.285	135.546	149.444	159.459	0.650667	0.113577	-0.149103	-0.709297	0.187556	0.152097	0.0798363
6491027	[N+](c1c(c(C(Nc2cc(Cl)ccc2)=O)ccc1)O)([O-])=O	3'-Chloro-3-nitrosalicylanilide	6.08	0	1.5485	2.39785	77.0001	0	0	12	2	4	0	0	0	1	0	0	1	4557.54	3535.67	125.115	99.4968	97.9936	83.3974	106.596	88.5265	98.213	200.086	197.954	220.408	217.755	8.42685	8.13688	8.50164	8.46694	8.44324	8.00642	160.173	148.085	155.55	163.002	0.518644	-0.270116	0.0254311	-0.131362	0.355121	-0.386142	0.209614
107493	O(P(OCC)(OCC)=O)P(OCC)(OCC)=O	TEPP	6.08	0	1.181	1.39476	60.6292	0	0	0	0	7	0	2	0	0	0	0	0	4884.96	1095.89	154.229	109.622	113.461	73.5879	51.0186	21.8549	14.0498	191.126	170.802	150.244	107.284	8.12989	8.03361	9.34623	8.72566	8.13762	7.93566	168.4	147.93	166.218	164.933	0.932494	-0.954037	0.946132	-0.800687	0.673465	-0.234321	-0.0480461
6284839	c1(c(c(cc(c1[N+](=O)[O-])Cl)Cl)[N+](=O)[O-])Cl	Benzene, 1,3,5-trichloro-2,4-dinitro-	6.09	0	2.9361	8.62068	51.5398	0	0	6	2	4	0	0	0	3	0	0	3	6052.97	0	211.746	251.023	417.683	183.892	411.566	0	0	326.272	218.821	273.313	0	10.1249	9.37503	10.6473	10.3939	13.0247	0	163.403	154.435	156.921	166.75	0.229433	0.0312928	-0.032546	-0.179546	0.0793627	-0.14207	0.12879
1757182	C(\c1c(ccc(c1)Cl)Cl)(OP(OCC)(OCC)=S)=C/Cl	Akton	6.14	0	3.7665	14.1865	92.4252	0	0	6	0	3	1	1	0	3	0	0	3	8270.62	3300.53	174.873	136.991	163.564	182.363	150.619	88.547	50.008	257.073	236.221	223.669	170.08	8.11458	8.10418	8.45344	8.61304	7.96495	7.67914	158.486	142.553	156.468	150.818	0.48389	-0.341363	0.249	-0.0791214	-0.130362	-0.0100858	0.023667
55406536	N(C(OCC#CI)=O)CCCC	3-Iodo-2-propynylbutylcarbamate	6.15	0	0.427	0.182329	51.5172	0	0	0	1	2	0	0	0	0	0	1	1	17979.2	2181.65	143.732	72.4486	93.0081	88.3532	172.061	99.2454	121.203	140.648	151.108	162.661	158.925	7.732	7.49575	7.84379	7.75664	7.77869	7.74315	163.531	148.739	165.501	168.883	0.377629	-0.319852	0.233572	-0.0762359	-0.052261	0.0200112	0.0300044
786196	P(SCSc1ccc(Cl)cc1)(OCC)(OCC)=S	Carbophenothion	6.16	0	3.9854	15.8834	92.451	0	0	6	0	2	3	1	0	1	0	0	1	7414.71	3377.75	185.009	124.431	127.99	96.3527	79.2723	70.5523	75.061	221.864	193.919	173.34	150.662	7.69932	7.70403	7.9813	7.71215	7.37409	7.52301	156.601	140.291	153.85	147.326	0.351197	-0.214096	0.146273	-0.0805402	-0.0465295	-0.0337937	0.0924546
327980	CCOP(=S)(CC)Oc1cc(c(cc1Cl)Cl)Cl	Trichloronat	6.17	0	2.6924	7.24902	80.0401	0	0	6	0	2	1	1	0	3	0	0	3	7724.1	1932.38	183.353	153.251	167.369	154.796	103.646	83.4176	56.8348	245.832	220.458	177.458	151.919	8.06987	8.21726	8.38584	7.93534	7.5516	7.61705	157.919	141.687	157.896	151.491	0.341727	-0.174544	0.0796718	-0.0374279	-0.132003	0.0604484	-0.00197375
133062	ClC(Cl)(Cl)SN1C(=O)[C@H]2CC=CC[C@H]2C1=O	Captan	6.18	0	3.2345	10.462	68.1818	0	0	0	1	2	1	0	0	3	0	0	3	6812.59	214.402	163.331	106.842	106.051	192.738	145.59	150.388	35.7336	196.067	226.69	239.334	225.169	8.47867	7.93382	8.19045	8.94132	8.59638	8.97879	158.935	143.145	157.549	161.855	0.445937	-0.253471	0.0816426	0.0088341	-0.176278	0.156358	-0.0572871
26530201	CCCCCCCCN1SC=CC1=O	Octhilinone	6.18	0	-1.8692	3.49391	52.8007	0	0	0	1	1	1	0	0	0	0	0	0	3086.22	1475.01	87.6118	39.3091	31.5847	31.2921	32.7811	34.8285	37.8207	123.875	120.523	121.89	123.769	7.36041	7.26542	7.2375	7.20633	7.24092	7.2885	164.006	145.405	164.509	163.92	0.210296	-0.104974	0.0274868	-0.0068172	-0.0300599	0.00578842	0.000213
58275	c12c(C(C=C(C1=O)C)=O)cccc2	Menadione	6.2	0	1.2921	1.66952	53.7331	0	0	6	0	2	0	0	0	0	0	0	0	2106.97	3.04819	100.562	82.1376	64.0689	48.8348	16.5672	5.04916	1.01606	186.818	157.201	105.53	61.503	7.7808	7.74241	7.93405	8.06713	7.28259	6.86362	154.523	138.782	147.677	156.356	0.275828	-0.107074	-0.0353781	0.0443531	-0.0600692	0.046173	-0.038431
104405	c1(ccc(O)cc1)CCCCCCCCC	4-Nonylphenol	6.2	0	-1.2576	1.58156	62.4865	0	0	6	0	1	0	0	0	0	0	0	0	2444.32	1573.44	66.2679	30.1177	24.6882	24.5228	25.8542	25.655	26.2239	118.245	115.851	119.894	118.367	7.19256	7.13832	7.0878	7.02541	7.11045	7.11516	163.135	144.057	161.445	163.256	0.247464	-0.11392	0.013037	-0.0232456	-0.0322132	0.0377333	-0.0108401
16245797	Nc1ccc(CCCCCCCC)cc1	4-Octylaniline	6.23	0	-1.6032	2.57025	61.5192	0	0	6	1	0	0	0	0	0	0	0	0	2239.26	1362.88	65.0111	29.9732	23.8728	23.7894	25.7695	24.7561	25.2385	117.204	114.413	121.295	116.915	7.11299	7.10011	7.05061	7.00762	7.07322	7.06299	164.197	146.043	161.477	163.785	0.18497	-0.0848678	0.0213798	-0.0331976	-0.0285061	0.0374113	-0.0110336
3347226	c12=c(c(c3ccccc3c1=O)=O)sc(C#N)c(s2)C#N	Dithianon	6.25	0	0.3344	0.111823	113.971	0	0	12	4	4	4	0	0	0	0	0	0	9967.55	14238	166.541	191.256	169.452	162.423	177.852	176.597	167.506	314.112	312.944	329.034	334.631	8.20981	8.09718	8.30001	8.39093	8.26535	8.14004	146.785	134.72	140.564	144.796	1.20279	-0.307022	-0.391339	0.167455	-0.0789405	-0.0744331	-0.0777094
3689245	O(P(=S)(OCC)OCC)P(=S)(OCC)OCC	Sulfotep	6.26	0	2.9792	8.87563	76.611	0	0	0	0	5	2	2	0	0	0	0	0	6428.71	1095.89	181.866	136.388	156.331	87.0033	62.0083	23.8786	14.0498	225.821	190.944	165.286	114.057	7.88081	7.86449	8.76045	8.31823	7.868	7.70983	164.177	146.032	162.959	152.92	0.66693	-0.557646	0.51607	-0.439496	0.364443	-0.181471	-0.042092
124221	C(CCCCCC)CCCCCN	Dodecylamine	6.26	0	-3.567	12.7235	43.949	0	0	0	1	0	0	0	0	0	0	0	0	1954.8	1082.48	53.4887	19.6787	19.474	19.227	18.923	18.5396	18.0413	101.955	100.929	99.6675	98.0763	7.05216	7.00166	7.00302	7.00465	7.00666	7.0092	168.139	148.25	166.955	167.201	0.18767	-0.0798106	-0.0270904	0.00941014	0.000813	2.76e-05	3.38e-07
18292972	c1(c(ccc(c1C)[N+](=O)[O-])[N+](=O)[O-])[N+](=O)[O-]	2,3,6-Trinitrotoluene	6.28	0	2.4897	6.19861	44.8909	0	0	6	3	6	0	0	0	0	0	0	0	3139.33	0	139.033	121.018	110.104	88.0872	108.017	255.968	0	205.328	148.366	133.303	216.391	9.38529	8.53664	9.09383	9.62577	10.3166	13.3517	169.456	158.653	156.565	169.489	0.18824	-0.00289255	-0.030318	0.0164394	-0.0435676	-0.1008	0.00283559
882337	c1(SSc2ccccc2)ccccc1	Diphenyl disulfide	6.3	0	3.0944	9.57531	76.154	0	0	12	0	0	2	0	0	0	0	0	0	3797.02	778.898	146.009	95.1057	90.9784	90.4437	68.8566	45.8702	27.8178	199.892	241.42	245.184	185.924	7.29827	7.32982	7.3645	7.41232	7.33941	7.17718	149.39	135.736	147.364	148.465	0.0762185	-0.0109392	-0.0255735	0.000278	-0.00408401	0.0118725	-0.00490179
19902046	C(CN(C\C=C(\CC\C=C(\C)C)C)C\C=C(\CC\C=C(\C)C)C)O	GD 174	6.35	0	5.1761	26.792	112.352	0	0	0	1	1	0	0	0	0	0	0	0	3665.6	4060.18	63.1305	35.6644	27.5688	28.0445	33.0585	28.2098	22.0662	121.466	119.423	138.519	128.16	7.16611	7.24802	7.08183	7.17011	7.17459	7.15238	165.047	146.085	156.272	163.421	0.408521	-0.102059	-0.118611	0.0158964	0.0274724	-0.0513851	0.0219455
608731	C1(C(C(C(Cl)C(C1Cl)Cl)Cl)Cl)Cl	HCH	6.37	0	4.1634	17.3339	54.081	0	0	0	0	0	0	0	0	6	0	0	6	8411.9	0	194.054	267.896	294.514	332.296	0	0	0	227.018	196.344	0	0	8.7782	8.69397	8.91141	9.20212	0	0	159.957	141.979	160.875	167.483	0.253541	6.07e-18	-0.12677	-0.034626	1.56e-17	0.034626	0
118741	c1(c(c(c(Cl)c(c1Cl)Cl)Cl)Cl)Cl	Hexachlorobenzene	6.38	0	3.6156	13.0726	59.253	0	0	6	0	0	0	0	0	6	0	0	6	8405.8	0	285.027	622.976	841.246	1256.7	0	0	0	482.983	503.971	0	0	9.80807	9.98017	10.809	12.0756	0	0	147.477	136.407	149.599	157.089	0.189305	0	-0.0946523	-0.0473261	6.94e-18	0.0473261	0
106514	C1=CC(=O)C=CC1=O	1,4-Benzoquinone	6.38	0	-0.0188	0.000353	31.0288	0	0	0	0	2	0	0	0	0	0	0	0	1381.58	0	108.195	64.9926	41.608	86	0	0	0	121.219	92.8528	0	0	8.23503	8.1438	8.32166	8.92955	0	0	155.945	139.995	158.539	169.146	0.249459	-0.113836	0.0495636	0.0212423	-0.174293	0.0925934	0
596850	C[C@]12CCCC([C@@H]1CCC(=C)[C@@H]2CCC(C)(C=C)O)(C)C	Manool	6.38	0	2.5043	6.27152	89.8443	0	0	0	0	1	0	0	0	0	0	0	0	3175.8	2640.16	64.9531	41.4357	27.0816	21.2641	22.908	26.5682	17.7192	128.785	111.026	101.349	126.817	7.138	7.27569	7.0937	7.0312	6.99784	7.2911	163.792	143.826	152.79	160.708	0.29059	-0.143253	0.0695365	-0.0468586	-0.0803495	-0.00552963	0.184686
123319	c1(ccc(cc1)O)O	Hydroquinone	6.4	0	0.2772	0.0768398	34.1668	0	0	6	0	2	0	0	0	0	0	0	0	1383.62	0	95.0425	56.5309	27.5895	31.8087	16.127	1.01606	0	101.895	70.2629	82.0136	31.0837	8.01838	7.97961	7.76021	7.5442	9.47117	6.71846	160.084	146.451	157.672	169.096	0.385281	-0.22333	0.0781801	-0.0501904	-0.113842	0.22609	-0.156979
140669	CC(C)(C)CC(C)(C)c1ccc(cc1)O	4-(1,1,3,3-Tetramethylbutyl)phenol	6.43	0	3.5713	12.7542	68.6937	0	0	6	0	1	0	0	0	0	0	0	0	2298.02	723.981	67.0875	40.288	25.2729	25.9499	18.0975	19.2834	18.5636	113.449	133.477	87.517	103.277	7.20879	7.30166	7.0242	7.11356	6.97648	7.39532	162.939	144.033	149.651	166.476	0.23866	-0.124726	0.0605713	-0.0674797	0.00189093	-0.0289806	0.0804478
4151502	O=S(=O)(NCC)C(F)(F)C(F)(F)C(F)(F)C(F)(F)C(F)(F)C(F)(F)C(F)(F)C(F)(F)F	Sulfluramid	6.45	0	4.4591	19.8836	60.852	0	0	0	1	2	1	0	17	0	0	0	17	9320.68	10157.9	198.228	239.176	238.401	226.181	219.703	210.979	199.175	221.994	213.665	208.578	202.748	11.7126	11.8253	11.925	11.8813	11.8354	11.6861	222.361	167.384	221.823	220.559	2.13218	-0.256664	-0.979274	-0.0179557	0.0345249	0.00319643	0.00378993
87683	C(\C(=C(\Cl)Cl)Cl)(=C(\Cl)Cl)Cl	Hexachloro-1,3-butadiene	6.46	0	3.634	13.206	50.6964	0	0	0	0	0	0	0	0	6	0	0	6	8117.27	0	331.948	748.543	841.246	1256.7	0	0	0	482.983	503.971	0	0	10.2616	10.4311	10.809	12.0756	0	0	151.613	139.611	153.642	157.089	0.195326	-0.043384	-0.0667405	-0.00285591	-0.0309224	0.0462399	0
28553120	CCCCCCC(C)COC(=O)c1ccccc1C(=O)OCC(C)CCCCCC	Diisononyl phthalate	6.47	0	-0.5702	0.325128	111.588	0	0	6	0	4	0	0	0	0	0	0	0	4817.41	6470.69	71.1642	39.5609	38.0864	43.781	38.0867	38.7903	37.1879	130.313	142.839	143.724	146.721	7.38383	7.28886	7.47221	7.56232	7.45604	7.43367	163.958	144.365	160.635	165.258	0.624386	-0.345637	0.0221516	0.121595	-0.345721	0.398037	-0.11512
2869343	NCCCCCCCCCCCCC	Tridecanamine	6.48	0	-3.855	14.861	46.8606	0	0	0	1	0	0	0	0	0	0	0	0	2101.1	1279.23	53.6795	19.851	19.6787	19.474	19.227	18.923	18.5396	102.804	101.955	100.929	99.6675	7.048	7.00052	7.00166	7.00302	7.00465	7.00666	167.958	147.971	166.747	166.955	0.191892	-0.0798106	-0.0292017	0.00941014	0.000813	2.76e-05	3.6e-07
1582098	c1(c(cc(C(F)(F)F)cc1[N+](=O)[O-])[N+](=O)[O-])N(CCC)CCC	Trifluralin	6.5	0	1.8487	3.41769	71.8764	0	0	6	3	4	0	0	3	0	0	0	3	4586.97	2416.93	107.763	79.4918	81.9078	90.9443	76.1404	44.7344	32.2257	187.533	194.455	144.589	126.859	8.65472	7.92685	8.33019	8.38861	8.75164	8.07417	176.749	154.955	164.863	170.814	0.488554	-0.212232	-0.0483265	0.200994	-0.156211	-0.423727	0.438797
58899	[C@@H]1([C@@H]([C@@H]([C@H]([C@@H]([C@@H]1Cl)Cl)Cl)Cl)Cl)Cl	Lindane	6.52	0	4.1634	17.3339	54.081	0	0	0	0	0	0	0	0	6	0	0	6	8411.9	0	194.054	267.896	294.514	332.296	0	0	0	227.018	196.344	0	0	8.7782	8.69397	8.91141	9.20212	0	0	159.957	141.979	160.875	167.483	0.253541	0	-0.12677	-0.034626	6.94e-18	0.034626	0
107028	C=CC=O	Acrolein	6.52	0	0.4084	0.166791	16.366	0	0	0	0	1	0	0	0	0	0	0	0	692.825	0	75.5887	30.9576	8.57153	0	0	0	0	56.5487	0	0	0	7.85589	7.62667	8.09482	0	0	0	163.188	145.632	169.081	185.051	0.14088	-0.0404388	-0.0377428	0.0281056	-0.0203641	0	0
1861401	c1(c(cc(C(F)(F)F)cc1[N+](=O)[O-])[N+](=O)[O-])N(CCCC)CC	Benfluralin	6.53	0	2.1385	4.57318	71.256	0	0	6	3	4	0	0	3	0	0	0	3	4586.97	3064.67	107.763	79.2394	80.9578	86.726	78.9058	43.5984	46.4344	186.191	182.301	147.089	126.482	8.65472	7.92606	8.29949	8.35173	8.88484	8.04227	176.749	154.955	164.951	169.011	0.488404	-0.211254	-0.0438075	0.174691	-0.11929	-0.41768	0.402191
101202	c1cc(ccc1NC(=O)Nc2ccc(c(c2)Cl)Cl)Cl	Triclocarban	6.54	0	2.3916	5.71975	84.6582	0	0	12	2	1	0	0	0	3	0	0	3	6303.05	3102.3	137.47	122.909	90.5442	96.0379	112.593	131.001	96.947	193.781	198.661	223.32	242.749	8.15981	8.10938	7.97709	8.22824	8.21928	7.94478	158.036	146.024	158.162	161.786	0.390318	-0.312861	0.278389	-0.229647	0.111566	0.0156325	-0.17423
57749	C1C2C(C(C1Cl)Cl)[C@]3(C(=C([C@@]2(C3(Cl)Cl)Cl)Cl)Cl)Cl	Chlordane	6.55	0	4.2426	17.9997	78.1776	0	0	0	0	0	0	0	0	8	0	0	8	11502.4	0	200.39	293.801	284.085	327.434	544.471	0	0	268.409	271.968	282.999	0	8.84671	8.61504	8.79093	9.33416	10.2857	0	155.114	138.785	153.751	160.122	0.328921	-0.0279088	-0.133446	-0.0296258	0.0117575	-0.0517547	0.066517
584792	CC(=C[C@@H]1[C@@H](C(=O)OC2CC(=O)C(=C2C)CC=C)C1(C)C)C	Allethrin	6.58	0	3.5716	12.7563	88.9958	0	0	0	0	3	0	0	0	0	0	0	0	3535.34	3288.9	78.0502	53.9342	43.6045	42.9798	42.5104	28.8225	37.8034	144.598	149.95	156.538	116.552	7.45844	7.58978	7.48503	7.69176	7.49149	7.36189	161.944	142.932	152.412	162.108	0.4432	-0.209712	0.041732	-0.175302	0.261859	-0.18312	0.097911
37529309	c1(N)ccc(cc1)CCCCCCCCCC	4-Decylaniline	6.58	0	-2.1792	4.74891	67.3424	0	0	6	1	0	0	0	0	0	0	0	0	2531.86	1756.39	63.8041	28.6696	23.5438	23.4389	24.9516	24.1129	24.3943	116.331	113.95	119.322	115.793	7.09656	7.08196	7.04024	7.00391	7.05522	7.04615	164.38	145.812	161.935	163.874	0.193456	-0.0848678	0.017137	-0.0331975	-0.0285039	0.0374328	-0.0109278
2104645	c1([P@@](Oc2ccc([N+](=O)[O-])cc2)(OCC)=S)ccccc1	EPN	6.59	0	2.9397	8.64184	91.19	0	0	12	1	4	1	1	0	0	0	0	0	5241.21	3513.57	150.051	106.401	103.924	85.0513	67.1291	53.1228	51.6702	217.869	215.928	201.41	157.284	7.95152	7.83348	8.11164	8.03264	7.61689	7.25487	158.123	143.627	154.245	153.926	0.355721	-0.188327	0.053817	0.0440385	-0.0460571	-0.0685632	-0.0297318
1204213	c1(C(=O)CBr)c(ccc(c1)OC)OC	2-Bromo-2',5'-dimethoxyacetophenone	6.59	0	0.6338	0.401702	61.5298	0	0	6	0	3	0	0	0	0	1	0	1	8606.37	320.369	128.314	132.522	105.187	102.628	102.688	58.5704	21.3579	209.246	159.64	136.806	111.474	7.98901	8.16154	7.97792	7.77643	7.78944	8.01182	159.918	143.938	150.481	151.881	0.445959	-0.107805	-0.109646	-0.0585928	-0.121395	0.276429	0.0113422
84628	c1(c(C(Oc2ccccc2)=O)cccc1)C(Oc1ccccc1)=O	Diphenyl phthalate	6.6	0	2.7432	7.52515	101.666	0	0	18	0	4	0	0	0	0	0	0	0	3923.38	4109.86	105.194	76.1326	81.7248	92.4224	83.5116	70.9723	54.0771	206.521	229.178	252.685	221.614	7.84936	7.80508	8.13499	8.50934	7.89222	7.61511	154.383	139.992	152.547	156.037	0.579153	-0.355562	0.115128	-0.0174941	-0.203676	0.315013	-0.166011
732263	c1(c(c(cc(c1)C(C)(C)C)C(C)(C)C)O)C(C)(C)C	2,4,6-Tris(1,1-dimethylethyl)phenol	6.63	0	4.9221	24.2271	86.2814	0	0	6	0	1	0	0	0	0	0	0	0	2883.2	256.048	64.4112	47.2585	30.9881	35.2309	40.8481	11.2557	1.01606	124.371	147.099	169.114	105.36	7.15581	7.30684	7.13121	7.40014	7.21308	7.19053	163.577	144.11	147.303	164.037	0.24246	-0.139383	0.0627932	-0.0382412	0.0816344	-0.164808	0.195079
955839	o1c(ccc1c2ccccc2)c3ccccc3	2,5-Diphenylfuran	6.64	0	2.3035	5.30611	80.3831	0	0	17	0	1	0	0	0	0	0	0	0	2576.39	1378.14	96.1969	61.4067	59.9241	54.8604	47.9451	49.0196	43.0668	198.074	192.713	185.467	190.792	7.40074	7.45192	7.55816	7.47711	7.2745	7.17157	152.868	138.699	151.11	152.915	0.19391	-0.0714696	-0.0270218	0.035627	-0.0129614	-0.0290912	-0.0147518
41198087	c1(O[P@@](SCCC)(OCC)=O)c(cc(Br)cc1)Cl	Profenofos	6.65	0	2.3651	5.5937	83.4989	0	0	6	0	3	1	1	0	1	1	0	2	11998.6	3501.69	185.29	134.54	183.517	142.462	104.196	114.11	51.4954	220.398	219.32	192.589	164.419	7.91771	7.87483	8.3305	8.5392	7.90775	7.44104	159.087	141.741	157.476	156.194	0.450519	-0.382544	0.26756	-0.0150561	-0.16497	0.169843	-0.188897
34364426	c1(c2ccccc2)cc(OP(Oc2ccccc2)(Oc2ccccc2)=O)cc(c1)C(C)C	Phosphoric acid, (1-methyl-1-phenylethyl)phenyl diphenyl	6.65	0	4.1606	17.3106	143.423	0	0	24	0	4	0	1	0	0	0	0	0	5903.78	8901.45	115.013	76.0514	78.6779	82.2442	84.2927	69.4061	51.7526	194.287	204.196	227.908	211.885	7.56645	7.59327	7.65058	7.99991	7.95722	7.6467	156.108	140.159	152.124	154.556	0.605224	-0.546562	0.469472	-0.318089	0.17658	-0.027364	-0.0378876
623256	c1(ccc(CCl)cc1)CCl	1,4-Bis(chloromethyl)benzene	6.65	0	2.524	6.37058	49.1712	0	0	6	0	0	0	0	0	2	0	0	2	3675.65	0	116.808	89.6116	64.9582	57.0175	150.001	155.967	0	148.397	124.664	230.49	125.439	7.67906	7.47705	7.50961	7.53853	7.92587	8.33092	157.223	140.632	148.604	162.282	0.109739	-0.0141749	-0.0530495	0.00887801	0.00678135	0.00192546	-0.00860135
70382	C1([C@@H]([C@@H]1\C=C(\C)C)C(OCc1c(cc(C)cc1)C)=O)(C)C	Dimethrin	6.66	0	4.2159	17.7738	90.4323	0	0	6	0	2	0	0	0	0	0	0	0	3279.37	3039.2	75.6728	51.4254	37.2309	37.366	40.7656	28.2703	45.3612	133.683	140.827	150.487	114.862	7.33305	7.43924	7.32606	7.59231	7.35003	7.41439	161.444	142.715	149.281	162.746	0.327711	-0.158199	0.0259242	-0.0825818	0.11525	-0.124176	0.147822
86500	COP(=S)(OC)SCn1c(=O)c2ccccc2nn1	Azinphos-methyl	6.7	0	1.1057	1.22257	78.8537	0	0	6	3	3	2	1	0	0	0	0	0	5826.39	2903.36	187.217	134.59	95.5552	109.627	91.7965	107.32	78.4693	191.12	203.849	157.563	213.689	8.08064	7.98093	8.4217	8.02466	7.88236	7.93112	161.344	147.44	151.221	161.066	0.551845	-0.286579	0.105768	-0.0985305	0.0419315	-0.192255	0.217175
957517	C(c1ccccc1)(c1ccccc1)C(N(C)C)=O	Diphenamid	6.7	0	1.8407	3.38818	81.9279	0	0	12	1	1	0	0	0	0	0	0	0	2777.66	467.348	85.185	59.3825	52.5069	59.1406	44.0195	19.8724	8.19909	174.301	192.048	172.703	111.175	7.3833	7.43014	7.48117	7.54697	7.4382	7.09197	159.114	143.037	150.837	158.056	0.281982	-0.095707	-0.0826422	-0.0124321	0.11121	0.0523642	-0.106313
1770805	CCCCOC(=O)C1C(C2(C(=C(C1(C2(Cl)Cl)Cl)Cl)Cl)Cl)C(=O)OCCCC	Dibutyl chlorendate	6.7	0	1.7136	2.93642	102.788	0	0	0	0	4	0	0	0	6	0	0	6	11036.9	9066.16	130.377	185.819	189.163	167.596	118.482	85.1418	83.9459	220.264	217.58	221.899	192.502	8.26423	8.24099	8.7035	8.91664	8.05774	8.15054	161.8	143.486	159.376	162.641	0.802924	-0.262122	0.14211	-0.208389	-0.916693	0.871699	0.191508
28689089	c1(c([N+]([O-])=O)c(Cl)cc(c1)Cl)[N+]([O-])=O	3,5-Dichloro-1,2-dinitrobenzene	6.72	0	2.5674	6.59154	46.8236	0	0	6	2	4	0	0	0	2	0	0	2	4797.29	0	185.89	179.611	253.272	245.9	291.646	0	0	263.178	225.672	206.124	0	9.79009	9.00747	9.98942	11.0844	11.0844	0	164.45	154.879	158.093	171.175	0.189661	0.0114203	0.0153473	-0.159082	-0.0451418	0.066414	0.0162119
608719	c1(c(c(c(Br)c(c1Br)Br)Br)Br)O	Pentabromophenol	6.72	0	3.1038	9.63357	70.2323	0	0	6	0	1	0	0	0	0	5	0	5	33045.8	0	451.732	1675.39	2079.47	2370.15	80.5432	0	0	446.931	367.905	147.867	0	9.00947	9.14307	9.38285	9.38185	8.34365	0	140.69	135.725	139.287	145.378	0.285021	-0.103406	-0.0849723	0.0131628	0.0217884	0.031906	-0.0209897
2385855	C12(C3(C4(C5(Cl)C3(Cl)C(C2(Cl)C5(C1(C4(Cl)Cl)Cl)Cl)(Cl)Cl)Cl)Cl)Cl	Mirex	6.74	0	5.85	34.2225	92.3588	0	0	0	0	0	0	0	0	12	0	0	12	16523.1	0	274.199	588.665	909.042	1048.97	1256.7	0	0	485.933	493.477	503.971	0	10.0142	9.92164	10.9933	11.4423	12.0756	0	149.357	135.667	149.157	158.666	0.602841	0.102716	-0.126361	-0.694082	0.196706	0.145465	0.0741355
3698837	[O-][N+](=O)c1c(cc(c([N+](=O)[O-])c1)Cl)Cl	1,3-Dichloro-4,6-dinitrobenzene	6.77	0	2.5674	6.59154	46.8236	0	0	6	2	4	0	0	0	2	0	0	2	4797.29	0	185.89	189.222	236.977	181.578	411.566	0	0	251.352	212.549	273.313	0	9.79009	9.0133	9.88061	10.2414	13.0247	0	164.45	154.879	158.043	168.815	0.181736	-0.00719128	-0.00284785	-0.0231495	-0.0597813	-0.126828	0.12893
37680652	c1(c2c(cccc2)Cl)c(ccc(c1)Cl)Cl	2,2',5-Trichlorobiphenyl	6.88	0	3.5217	12.4024	73.62	0	0	12	0	0	0	0	0	3	0	0	3	5508.39	62.996	140.763	125.364	130.004	190.523	136.721	47.1648	10.4993	256.413	265.107	214.884	136.097	7.89738	7.79763	7.91456	8.06818	7.92867	7.63582	150.929	137.315	148.658	150.407	0.111965	-0.048992	0.000752	0.0203758	-0.0544569	0.0232274	0.0201074
12789036	ClC1CC2C(C1Cl)C3(Cl)C(=C(Cl)C2(Cl)C3(Cl)Cl)Cl	Chlordane, technical	6.9	0	4.2426	17.9997	78.1776	0	0	0	0	0	0	0	0	8	0	0	8	11502.4	0	200.39	293.801	284.085	327.434	544.471	0	0	268.409	271.968	282.999	0	8.84671	8.61504	8.79093	9.33416	10.2857	0	155.114	138.785	153.751	160.122	0.328921	-0.0279088	-0.133446	-0.0296258	0.0117575	-0.0517547	0.066517
3383968	COP(=S)(OC)Oc1ccc(Sc2ccc(OP(=S)(OC)OC)cc2)cc1	Temefos	7.14	0	3.6202	13.1058	127.802	0	0	12	0	6	3	2	0	0	0	0	0	8866.63	5766.79	184.495	132.779	91.6605	91.8595	65.5479	76.4526	86.0714	209.239	219.787	168.368	148.735	7.95766	7.90371	8.24935	7.77238	7.48005	7.32444	157.057	141.906	144.568	153.751	0.823782	-0.620518	0.472534	-0.0562017	-0.350439	0.16875	-0.241989
59756604	c1(c2cc(ccc2)C(F)(F)F)c(c(c2ccccc2)cn(c1)C)=O	Fluridone	7.18	0	2.1261	4.5203	88.7072	0	0	14	1	1	0	0	3	0	0	0	3	4290.23	3900.03	107.299	82.6451	73.5823	80.7382	69.6554	62.8749	58.2095	201.254	217.912	202.259	167.057	8.12846	7.70104	7.92147	8.01777	7.96405	7.90663	165.929	144.642	150.678	161.59	0.595131	-0.24654	-0.162879	-0.0076285	0.245312	0.0728875	-0.435414
76448	C1([C@@]2([C@@H]3[C@@H](C=C[C@@H]3Cl)[C@@]1(Cl)C(=C2Cl)Cl)Cl)(Cl)Cl	Heptachlor	7.21	0	4.0327	16.2627	75.801	0	0	0	0	0	0	0	0	7	0	0	7	10244.6	0	198.843	307.975	322.123	303.453	210.158	0	0	288.8	261.624	179.277	0	8.79668	8.64104	8.91451	9.24191	9.44555	0	153.166	137.887	151.909	158.935	0.30719	-0.0259027	-0.123126	-0.117571	0.0845514	0.0535615	-0.0251075
70304	c1(Cc2c(c(cc(c2Cl)Cl)Cl)O)c(c(cc(c1Cl)Cl)Cl)O	Hexachlorophene	7.29	0	3.9578	15.6642	95.5806	0	0	12	0	2	0	0	0	6	0	0	6	9933.68	7194.55	179.98	226.175	192.414	187.497	245.686	353.204	299.773	266.46	257.614	314.673	321.904	8.7961	8.60036	8.70604	8.51895	8.83461	9.40678	153.248	140.742	148.005	154.914	0.543585	-0.262614	-0.0404594	0.091621	-0.110092	0.0175362	0.0160946
60571	C1[C@@H]2[C@H]3[C@@H]([C@H]1[C@H]4[C@@H]2O4)[C@]5(C(=C([C@@]3(C5(Cl)Cl)Cl)Cl)Cl)Cl	Dieldrin	7.33	0	2.3381	5.46671	76.1249	0	0	0	0	1	0	0	0	6	0	0	6	9535.48	0	167.738	226.447	214.62	164.22	145.679	35.7336	0	239.149	236.881	181.819	125.161	8.51998	8.2582	8.37021	8.70509	9.47078	9.0072	155.381	139.023	153.224	159.962	0.413474	-0.0677323	-0.159078	-0.0429139	0.0888318	-0.0877453	0.0783591
13071799	P(SCSC(C)(C)C)(OCC)(OCC)=S	Terbufos	7.34	0	3.6937	13.6434	76.9518	0	0	0	0	2	3	1	0	0	0	0	0	5874.56	1310.58	156.921	88.0903	82.7671	60.4589	70.7752	27.6614	25.6977	153.768	153.689	170.151	117.343	7.45035	7.54524	7.51804	7.52804	7.3852	7.70924	161.869	143.117	152.965	159.107	0.326022	-0.205432	0.165571	-0.142143	0.0373908	-0.0785848	0.16101
206440	c12c3c4ccccc4c1cccc2ccc3	Fluoranthene	7.35	0	2.5688	6.59873	75.2282	0	0	16	0	0	0	0	0	0	0	0	0	2318.39	6.09638	98.6927	72.6703	63.1942	45.9702	28.3459	6.56158	1.01606	229.367	188.409	138.931	72.9102	7.22434	7.27037	7.25129	7.19168	7.083	6.91805	149.149	135.873	144.398	145.37	0.071303	-0.00768046	-0.0309442	0.0101904	0.0117955	-0.0175943	-0.0271508
52645531	CC1(C)C(C=C(Cl)Cl)C1C(=O)OCc2cccc(Oc3ccccc3)c2	Permethrin	7.39	0	3.5709	12.7513	113.628	0	0	12	0	3	0	0	0	2	0	0	2	6331.18	4669.19	105.919	66.1453	62.8046	78.584	78.6532	58.2714	56.9413	166.14	195.72	198.512	177.713	7.75927	7.70516	7.67615	8.04453	7.89749	7.3944	157.689	141.331	152.428	161.113	0.493161	-0.274231	0.0865011	-0.0410162	0.057989	-0.132619	-0.0199115
50293	c1cc(ccc1C(c2ccc(cc2)Cl)C(Cl)(Cl)Cl)Cl	DDT	7.46	0	4.8069	23.1063	93.4157	0	0	12	0	0	0	0	0	5	0	0	5	8312.35	2042.85	151.789	117.451	131.6	130.423	117.501	293.348	120.168	248.44	240.094	225.394	240.923	8.08613	7.80794	7.80875	8.03173	8.12701	8.23366	152.863	138.28	149.071	151.235	0.221741	-0.114765	-0.00663084	-0.0485937	0.11817	0.0663076	-0.257173
120127	c12c(cc3ccccc3c1)cccc2	Anthracene	7.47	0	2.4922	6.21106	67.3498	0	0	14	0	0	0	0	0	0	0	0	0	2029.86	54.5247	93.4345	61.3571	45.9815	41.3649	38.0498	21.9955	5.45247	185	167.605	162.978	120.519	7.19799	7.23555	7.17007	7.11368	7.12271	7.04017	151.012	136.921	146.539	150.926	0.0708693	-0.00618514	-0.0174016	-0.00578114	-0.0236457	0.0173819	-0.00231543
40596698	COC(C)(C)CCCC(C)C\C=C\C(=C\C(=O)OC(C)C)\C	Methoprene	7.49	0	2.1977	4.82989	92.6308	0	0	0	0	3	0	0	0	0	0	0	0	3543.47	3090.05	66.9216	36.6149	29.1914	26.0573	32.9823	28.7317	21.4587	120.887	115.043	131.914	133.392	7.35273	7.49127	7.17771	7.31777	7.17274	7.3295	165.226	145.484	158.94	163.552	0.473374	-0.233115	0.0983394	-0.183965	0.129068	-0.0569826	0.0450746
77474	C1(C(=C(C(=C1Cl)Cl)Cl)Cl)(Cl)Cl	Hexachlorocyclopentadiene	7.59	0	3.4978	12.2346	54.007	0	0	0	0	0	0	0	0	6	0	0	6	8261.54	0	297.824	731.916	1256.7	0	0	0	0	503.971	0	0	0	10.0142	10.4757	12.0756	0	0	0	149.357	137.281	154.176	168.159	0.227123	-0.0155516	-0.0990646	-0.112165	0.11322	0	0
72435	C(c1ccc(OC)cc1)(c1ccc(OC)cc1)C(Cl)(Cl)Cl	Methoxychlor	7.61	0	3.0723	9.43903	97.2703	0	0	12	0	2	0	0	0	3	0	0	3	6605.51	4313.1	118.692	96.3862	102.946	89.088	76.5237	121.218	95.8466	225.463	192.588	179.244	198.345	7.89876	7.78891	7.69813	7.70849	7.83204	8.10317	157.718	141.897	149.069	151.026	0.450798	-0.163002	-0.0695368	-0.0356573	0.0674696	0.0403416	-0.35019
309002	C1[C@@H]2C=C[C@H]1[C@H]3[C@@H]2[C@]4(C(=C([C@@]3(C4(Cl)Cl)Cl)Cl)Cl)Cl	Aldrin	7.65	0	3.0608	9.3685	78.0286	0	0	0	0	0	0	0	0	6	0	0	6	9279.51	0	166.054	232.329	225.805	145.685	69.0454	35.7336	0	245.834	228.876	154.835	125.161	8.33414	8.17109	8.26712	8.45569	8.88407	9.0072	154.224	138.035	152.502	158.793	0.274783	-0.0196775	-0.138347	-0.139625	0.131705	0.111541	-0.0680914
17109363	C(c1c(c(cc(c1O)C(C)(C)C)Cl)C)(=O)Nc1c(cc(cc1)[N+](=O)[O-])Cl	Salicylanilide I	7.69	0	3.7242	13.8697	103.905	0	0	12	2	4	0	0	0	2	0	0	2	6544.71	6838.66	111.323	97.1974	76.0396	91.1472	71.4999	78.961	69.0773	178.079	183.618	186.942	195.32	8.05961	7.8916	7.86085	8.21399	7.87336	8.05033	161.623	146.681	150.396	161.212	0.530067	-0.301074	0.100484	-0.0850541	0.048156	-0.0408604	0.137104
10453868	CC(=CC1C(C1(C)C)C(=O)OCc2cc(oc2)Cc3ccccc3)C	Resmethrin	7.74	0	3.2624	10.6433	106.228	0	0	11	0	3	0	0	0	0	0	0	0	3968.13	3638.8	83.9512	51.7666	41.9128	50.0001	46.7644	32.9308	47.879	140.243	168.675	163.545	123.177	7.46327	7.51518	7.41926	7.6768	7.52578	7.37865	159.876	142.215	151.121	163.323	0.459422	-0.189605	-0.00618953	-0.131909	0.194367	-0.113235	0.0464126
1484135	c12c3c(cccc3)n(c1cccc2)C=C	N-Vinylcarbazole	7.78	0	1.7217	2.96425	70.4137	0	0	13	1	0	0	0	0	0	0	0	0	2227.07	7.11245	94.9139	70.3376	61.0006	42.9702	22.8696	5.60545	1.01606	217.082	180.298	124.245	65.6987	7.29508	7.4149	7.37007	7.22549	7.05357	6.88364	154.633	141.087	151.749	150.072	0.125018	-0.0319612	-0.018928	0.00760844	-0.00274578	-0.0271897	-0.031151
83794	c12c3c(O[C@H](C3)C(=C)C)ccc1C(=O)[C@@H]1[C@H](O2)COc2c1cc(c(c2)OC)OC	Rotenone	7.85	0	0.1387	0.0192377	114.149	0	0	12	0	6	0	0	0	0	0	0	0	4876.24	5100.06	100.981	83.942	70.9558	60.5806	63.4959	50.9103	50.0005	201.998	181.517	184.613	158.784	7.86958	8.01919	7.93809	7.77292	7.86724	7.79236	158.768	142.635	150.569	154.252	0.863901	-0.258897	-0.241316	0.0979615	-0.000302	-0.137823	0.0292422
51630581	c1(C(C(=O)OC(c2cc(Oc3ccccc3)ccc2)C#N)C(C)C)ccc(cc1)Cl	Fenvalerate	7.92	0	3.3547	11.254	129.12	0	0	18	1	3	0	0	0	1	0	0	1	5849.76	6363.85	100.515	70.8391	64.7263	67.5246	62.7957	67.0015	56.8201	186.295	200.023	193.087	185.032	7.66638	7.69176	7.68781	7.93739	7.57199	7.50331	157.188	141.018	153.239	157.281	0.595866	-0.277542	-0.0301904	0.0392239	0.0116989	-0.0290946	-0.211248
39515418	CC1(C(C1(C)C)C(=O)OC(C#N)c2cccc(c2)Oc3ccccc3)C	Fenpropathrin	8.17	0	3.0337	9.20334	107.65	0	0	12	1	3	0	0	0	0	0	0	0	4161.28	4586.11	89.83	61.3374	48.9268	48.2207	69.9062	54.7649	46.7971	153.186	151.804	222.469	181.512	7.56475	7.65925	7.51797	7.83873	7.59426	7.4157	159.391	141.994	151.607	160.62	0.551562	-0.266486	-0.000213	0.00416622	0.0268664	-0.0900346	-0.0514443
96489713	c1cc(C(C)(C)C)ccc1CSc1c(Cl)c(=O)n(C(C)(C)C)nc1	Pyridaben	8.2	0	3.2171	10.3497	102.386	0	0	6	2	1	1	0	0	1	0	0	1	5699.33	3591.03	96.8835	85.2533	50.1309	51.3097	60.9459	84.2953	49.8754	141.243	154.006	161.525	211.9	7.46543	7.63758	7.29782	7.4954	7.50689	7.68984	161.54	144.369	152.568	164.184	0.36916	-0.116196	-0.0827804	-0.0499188	0.116443	-0.0830034	0.00910806
27304138	O1[C@@H]2[C@@H]3[C@@H]([C@@]4(C(Cl)=C([C@@]3(C4(Cl)Cl)Cl)Cl)Cl)[C@@H](Cl)[C@@]12Cl	Oxychlordane	8.21	0	3.6423	13.2663	78.1321	0	0	0	0	1	0	0	0	8	0	0	8	11756.3	0	214.24	329.078	329.555	443.651	865.268	0	0	301.452	325.713	387.551	0	9.22764	8.9248	9.19992	10.0912	11.3863	0	153.841	138.802	152.646	158.865	0.494908	-0.0955307	-0.0983819	0.0150634	-0.187102	-0.000387	0.118884
115297	C1C2C(COS(=O)O1)C3(C(=C(C2(C3(Cl)Cl)Cl)Cl)Cl)Cl	Endosulfan	8.47	0	2.166	4.69156	76.9888	0	0	0	0	3	1	0	0	6	0	0	6	10640.4	0	221.968	288.337	229.374	219.442	502.28	567.165	0	232.034	220.894	328.229	330.234	9.17713	8.75229	8.9618	9.40699	10.5349	12.6976	156.932	140.472	151.323	161.684	0.550766	-0.249782	0.0867884	-0.0881216	-0.0633166	0.0824432	-0.148173
22431625	CC1(C)[C@H](C=C2CCCC2)[C@H]1C(=O)OCc3coc(Cc4ccccc4)c3	Bioethanomethrin	8.57	0	1.5272	2.33234	110.778	0	0	11	0	3	0	0	0	0	0	0	0	4258.69	4056.52	84.5935	46.2755	42.2182	51.723	49.6972	36.2143	37.5603	142.677	174.067	172.633	133.298	7.43899	7.42117	7.40785	7.64646	7.49967	7.38771	159.584	141.793	153.884	162.691	0.463588	-0.188894	-0.0104008	-0.12329	0.184911	-0.116275	0.0182147
68359375	CC1(C)C(C=C(Cl)Cl)C1C(=O)OC(C#N)c2ccc(F)c(Oc3ccccc3)c2	Cyfluthrin	8.6	0	3.3467	11.2004	118.565	0	0	12	1	3	0	0	1	2	0	0	3	7030.54	6861.39	114.297	78.8115	74.5945	93.8689	97.8787	74.7192	74.5803	184.801	215.557	222.703	203.548	8.02621	7.92593	7.85517	8.24955	8.29053	7.72276	160.116	142.128	154.439	161.312	0.661607	-0.328597	-0.0386356	0.151519	-0.0531185	-0.184347	0.0905976
70124775	c1(C(C(=O)OC(c2cc(Oc3ccccc3)ccc2)C#N)C(C)C)ccc(cc1)OC(F)F	Flucythrinate	9.35	0	3.3093	10.9515	131.054	0	0	18	1	4	0	0	2	0	0	0	2	5716.18	7673.84	100.945	70.01	67.0976	67.0657	59.6823	61.4215	60.9035	188.401	193.972	186.854	184.465	7.96762	7.75271	7.77435	8.05714	7.69892	7.57112	162.677	143.467	153.761	158.022	0.866948	-0.467079	0.0512738	-0.00186463	0.022052	-0.0170135	-0.252734
[truncated: 271 more columns]
