# Supplementary material for: A joint optimization QSAR model of fathead minnow acute toxicity based on a radial basis function neural network and its consensus modeling
Source: RSC Adv. 2020 Jun 4;10(36):21292–308. doi: 10.1039/d0ra02701d (PMC9054390; doi:10.1039/d0ra02701d)
Supplement: RA-010-D0RA02701D-s003 [file RA-010-D0RA02701D-s003.xlsx]

## Sheet: ValidationSet 56Descriptors
Cas No.	Acute Toxicity：-logLC50（mol/l）	khs.dsCH	RotBFrac	XLogP	CrippenLogP	RotBtFrac	AMR	GATS1v	SIC2	naAromAtom	JGI4	khs.ssS	FMF	GATS6i	AATS7e	GATS1i	JGI2	JGI10	AATS4v	IC1	khs.ddsN	khs.dCH2	C1SP2	AATS7v	C3SP2	AATS1i	SIC1	khs.ssNH	SIC3	khs.dO	C2SP3	MDEC-22	AATS5v	khs.sNH2	GATS1m	JGI6	GATS2s	MATS1c	VE1_D	AATS5e	JGI5	khs.sssCH	n6HeteroRing	JGI8	khs.aasC	khs.dssS	ALogp2	MDEC-23	MDEC-33
87729	0.6	0	0	-1.454	-2.5823	0.4	29.9609	1.10294	0.774293	0	0.0874074	0	0.3	4.43e-05	6.71846	1.52421	0.142857	0	96.8514	2.50869	0	0	0	31.0837	0	154.335	0.580457	0	0.921853	0	3	0	64.2184	0	0.924219	0	1.00706	-0.511076	1.67e-16	7.92606	0	4	1	0	0	0	4.01081	2.14914	3.96541
94757	2.05	0	0.230769	1.592	2.4568	0.461538	53.1163	0.718148	0.866748	6	0.0557576	0	0.315789	1.11771	8.88232	1.10854	0.0915033	0	222.212	3.43162	0	0	1	156.273	0	144.409	0.807835	0	0.95044	1	0	2.33482	202.623	0	0.504655	0.0152041	0.489312	-0.549112	0.154071	8.2224	0.0408951	0	0	0	3	0	1.20626	7.61592	2.18225
87912	2.5	0	0.538462	-0.75	-1.1656	0.846154	44.3392	1.29928	0.69162	0	0.04	0	0	1.08231	8.01649	1.75288	0.138889	0	169.525	2.69951	0	0	2	97.6246	0	150.687	0.561538	0	0.69162	2	2	0.142857	147.02	0	0.855804	0.0153061	0.768333	-0.532559	6.11e-16	8.59096	0.0231481	2	0	0.0123457	0	0	0.506375	2.4171	3.96541
15128822	2.92	0	0.1	0.953	0.5544	0.3	34.1045	0.798389	0.962479	6	0.0377778	0	0.428571	7.48e-05	0	1.16254	0.102564	0	167.93	3.32486	1	0	2	0	0	156.564	0.873274	0	1	1	0	2.3811	117.695	0	0.598661	0	0.535461	-0.44697	0.0515001	9.04007	0.0625	0	1	0	2	0	0.853406	2.94168	1
584849	3.02	0	0.153846	4.175	0.39952	0.230769	48.7762	0.885735	0.807835	6	0.0502564	0	0.315789	0.395579	8.70367	1.2974	0.0833333	0	188.968	3.0761	0	0	0	190.63	1	145.664	0.724142	0	0.891527	2	0	3.24283	165.248	0	0.598774	0.0269388	0.247447	-0.740038	0.0603807	8.00777	0.0291667	0	0	0	3	0	0.0982196	7.33146	1.65096
109604	3.23	0	0.5	1.022	0.9595	0.833333	25.2386	1.50826	0.805578	0	0.0533333	0	0	0.904139	6.71846	1.84361	0.0740741	0	121.404	2.13339	0	0	1	31.0837	0	148.227	0.521934	0	0.776796	1	1	1	110.815	0	0.998993	0	0.480494	-0.655899	0.0772246	7.43159	0	0	0	0	0	0	0.0938197	0.816497	0
14321278	3.37	0	0.3	1.339	1.4566	0.4	47.7384	1.12553	0.739341	6	0.0251852	0	0.26087	1.03898	6.94511	1.29377	0.040404	0	122.582	2.65962	0	0	0	88.154	1	146.817	0.587947	1	0.831705	0	0	8.73703	120.871	0	1.0933	0.0201361	1.2061	-0.277854	0.162869	7.11988	0.0180556	0	0	0	1	0	1.32641	4.19536	0
68111	3.49	0	0.25	0.064	0.0008	0.75	20.4729	1.03089	0.929897	0	0	0	0	0	0	1.14759	0.111111	0	72.4787	2.9477	0	0	1	0	0	147.806	0.929897	0	0.929897	1	0	0	31.0837	0	1.0481	0	0.434907	-0.756688	0.0608102	6.71846	0	0	0	0	0	0	0.00481636	1	0
447609	3.61	0	0.0833333	1.759	2.23598	0.333333	41.1488	0.829024	0.738205	6	0.0457143	0	0.375	0.975596	0	0.798496	0.104575	0	198.717	2.70282	0	0	0	0	2	148.691	0.675705	0	0.894455	0	0	5.08568	146.93	0	0.490144	0	0.40108	-0.54804	0.0240013	9.98723	0.0357143	0	0	0	2	0	4.60102	5.67624	1
5922601	3.73	0	0	0.542	1.86009	0.2	44.2003	0.603892	0.884735	6	0.0761905	0	0.4	0.154977	0	0.788229	0.102564	0	174.189	3.13957	0	0	0	0	1	147.703	0.803599	0	0.965872	0	0	2.62074	127.278	1	0.528167	0	0.429799	-0.504101	0.0444717	7.91077	0.0208333	0	0	0	3	0	0.17181	7.48569	1.65096
393395	3.78	0	0.0833333	1.32	3.2486	0.5	39.8479	0.791073	0.83436	6	0.0608547	0	0.352941	1.19827	0	0.871218	0.111111	0	164.659	3.13072	0	0	0	0	1	158.271	0.765932	0	0.902789	0	0	1.65096	113.643	1	0.55199	0	0.465703	-0.639457	0.0103015	10.0827	0.0267857	0	0	0	3	0	1.03836	5.8538	1.65096
42087809	3.89	0	0.214286	1.464	1.8938	0.428571	49.658	0.842247	0.889982	6	0.0585185	0	0.3	0.934816	8.00206	1.09032	0.105263	0	211.81	3.60869	1	0	1	92.7994	1	148.593	0.834973	0	0.944991	2	0	1.65096	199.32	0	0.483091	0.0161633	0.476264	-0.468101	0.0755638	9.44757	0.0357143	0	0	0	3	0	3.2436	6.8308	3.14735
645567	4.09	0	0.2	2.371	2.3447	0.4	45.0169	1.06302	0.788447	6	0.057037	0	0.272727	0.947799	7.41296	1.07704	0.0740741	0	126.255	2.83891	0	0	0	78.2915	1	143.819	0.636608	0	0.869991	0	2	6.67872	118.085	0	1.03737	0.0404082	0.511145	-0.513734	0.113509	7.0993	0.0364583	0	0	0	2	0	0.221276	7.00379	0.333333
2234164	4.21	0	0.0909091	1.765	3.196	0.363636	49.9385	0.733952	0.805578	6	0.0493333	0	0.352941	0.679507	9.0072	0.984342	0.103704	0	224.479	3.01307	0	0	0	125.161	1	139.91	0.737149	0	0.902789	1	0	1.65096	137.864	0	0.474066	0	0.569738	-0.383251	0.0198784	7.90013	0.0787037	0	0	0	3	0	2.8605	6.8308	3.14735
120832	4.32	0	0	1.889	2.699	0.333333	41.9937	0.572771	0.818007	6	0.103333	0	0.461538	0.152469	0	0.819079	0.111111	0	181.628	2.66123	0	0	0	0	0	142.362	0.719165	0	0.958425	0	0	1.65096	110.564	0	0.492575	0	0.620525	-0.546388	0.0232586	8.16298	0	0	0	0	3	0	2.48914	5.8538	1.65096
554007	4.41	0	0	1.478	2.5756	0.333333	43.938	0.56822	0.798231	6	0.103333	0	0.428571	0.130935	0	0.815547	0.111111	0	165.998	2.69951	0	0	0	0	0	147.937	0.709026	0	0.924957	0	0	1.65096	95.581	1	0.491105	0	0.603517	-0.614409	0.0232586	7.54821	0	0	0	0	3	0	0.891325	5.8538	1.65096
63252	4.45	0	0.1875	1.708	2.558	0.25	62.97	0.892416	0.72248	10	0.0373856	0	0.384615	1.23367	7.52939	1.13304	0.0740741	0	194.818	2.92898	0	0	0	131.511	2	144.85	0.62313	1	0.866914	1	0	8.73703	185.102	0	0.744024	0.0182857	0	-0.804576	0.181056	7.7882	0.0228175	0	0	0.0204082	1	0	2.30827	11.1401	3.14735
999611	4.59	1	0.5	0.284	0.02259	0.75	32.9372	1.28375	0.891527	0	0.064	0	0	0.98457	7.28278	1.58534	0.0987654	0	116.567	3.18137	0	1	2	74.2107	0	149.102	0.748922	0	0.866748	1	1	0.333333	164.468	0	0.915919	0	0.723564	-0.636294	0.0142428	7.92139	0.0222222	1	0	0	0	0	0.00383161	2.37841	0.333333
133119	4.68	0	0.166667	1.976	2.69439	0.277778	71.4662	0.776807	0.741803	12	0.0423392	0	0.5	0.91733	7.83507	0.889022	0.0740741	0.0123457	173.288	2.95021	0	0	1	186.524	1	145.89	0.613687	0	0.899635	1	0	8.13191	186.234	1	0.764162	0.0108299	0.553644	-0.58164	0.077779	8.23785	0.0328704	0	0	0.0145773	4	0	0.0982823	12.288	4.13085
3687136	4.74	0	0.153846	0.97	2.80439	0.384615	55.4044	0.843618	0.807835	6	0.0779487	0	0.315789	0.960633	8.05011	1.36004	0.0818713	0	264.503	3.18137	0	0	0	137.765	0	140.252	0.748922	0	0.891527	2	0	1.65096	225.384	0	0.630619	0.0606122	0.425917	-0.65858	0.0428001	8.78301	0.0183081	0	0	0	3	0	1.96981	5.8538	1.65096
90131	4.85	0	0	2.535	3.4932	0.0833333	53.869	0.715029	0.568253	10	0.0483951	0	0.555556	0.82163	6.71846	0.799853	0.0833333	0	195.383	1.87532	0	0	0	31.0837	2	137.506	0.449724	0	0.783307	0	0	8.73703	141.002	0	0.505037	0	1.04732	-0.257166	0.0186459	7.43324	0.0208333	0	0	0	1	0	5.36617	10.1274	2.3811
874420	4.99	1	0.1	1.584	2.8059	0.3	45.462	0.656581	0.835752	6	0.0647619	0	0.428571	0.157728	0	0.912766	0.102564	0	205.5	2.61058	0	0	1	0	1	138.959	0.685667	0	0.962479	1	0	2.74946	140.211	0	0.465262	0	0.726882	-0.270179	0.0445272	8.31098	0.0590278	0	0	0	3	0	3.07231	7.30837	1.65096
629049	5.09	0	0.714286	4.37	3.3517	1	33.768	1.28797	0.550863	0	0.02	0	0	0.83918	7.12775	1.51707	0.037037	0	105.477	1.47082	0	0	0	95.8923	0	145.029	0.325147	0	0.624003	0	5	7.47342	103.879	0	0.534112	0.0204082	1.20227	-0.135289	2.22e-16	7.05748	0.0185185	0	0	0	0	0	0.238437	0	0
1689823	5.23	0	0.125	2.508	3.70529	0.1875	62.1725	0.819952	0.592716	12	0.0448485	0	0.56	0.819008	7.30679	0.879941	0.0555556	0.0123457	157.335	2.20151	0	0	0	188.796	0	145.258	0.474069	0	0.780271	0	0	10.2686	202.023	0	0.755081	0.00371057	0.622889	-0.434514	0.00992986	7.66036	0.0214646	0	0	0.0136054	3	0	1.82277	9.12838	0.793701
74908	5.3	0	0	-0.357	0.13978	0	7.0145	1.06993	0.666667	0	0	0	0	0	0	1.42303	0	0	0	1.58496	0	0	0	0	0	158.39	1	0	0	0	0	0	0	0	0.637958	0	1.97368	-0.136663	0	0	0	0	0	0	0	0	0.322056	0	0
39515510	5.63	1	0.1875	1.566	3.79219	0.1875	67.2599	0.853525	0.62717	12	0.032381	0	0.52	1.01619	7.30434	0.962565	0.0333333	0	178.43	2.09391	0	0	1	168.698	1	139.984	0.450899	0	0.831952	1	0	13.1259	209.464	0	0.703245	0.0145455	0.72607	-0.322358	0.0303172	7.7535	0.0144231	0	0	0.00818846	3	0	1.87992	11.2981	1.19055
143500	6.07	0	0	3.726	4.6182	0.4	83.1998	0.45091	0.636706	0	0.0795556	0	0.47619	0.252876	0	0.829885	0.192872	0	462.871	1.97665	0	0	0	0	0	135.546	0.450024	0	0.69644	1	1	0	455.304	0	0.786026	0	0.410569	0.146626	0.00512298	11.6245	0.0229701	0	0	0	0	0	20.2392	0	0
41198087	6.65	0	0.388889	3.546	4.7891	0.611111	83.4989	0.923968	0.830207	6	0.0510145	1	0.181818	0.954395	7.44104	1.27928	0.0925926	0	220.398	3.39199	0	0	0	164.419	0	141.741	0.672428	0	0.894814	1	1	3.73439	219.32	0	0.504451	0.0238655	0.742299	-0.849119	0.0504983	8.5392	0.0167298	0	0	0.0146492	3	0	5.5937	6.18269	1.65096
27304138	8.21	0	0	3.433	4.94539	0.363636	78.1321	0.496339	0.884662	0	0.0680392	0	0.478261	0.0736226	0	1.04643	0.176389	0	301.452	3.15357	0	0	0	0	0	138.802	0.697143	0	0.923108	0	4	0	325.713	0	0.526093	0.00666667	0.905861	-0.170755	0.105158	10.0912	0.0549339	4	0	0	0	0	13.2663	0	7.38314
112276	0.34	0	0.777778	-1.588	-0.9958	1	36.6406	1.5117	0.463649	0	0.0133333	0	0	0.509235	7.48759	2.00367	0.0277778	0	123.077	1.89624	0	0	0	112.36	0	152.534	0.413578	0	0.600142	0	0	5.26933	100.904	0	1.03613	0.0102041	0	-0.362466	5e-16	7.74659	0.0111111	0	0	0.0123457	0	0	1.34374	0	0
78922	1.31	0	0.25	0.742	0.7772	1	20.6715	1.61168	0.701215	0	0	0	0	0	0	1.70479	0.111111	0	61.8487	1.8716	0	0	0	0	0	149.787	0.479052	0	0.803599	0	2	0	31.0837	0	1.39465	0	0.801496	-0.54737	0.0608102	6.71846	0	1	0	0	0	0	0.484555	1	0
143226	2.04	0	0.846154	0.281	0.8286	1	52.1292	1.56123	0.557148	0	0.008	0	0	0.851126	7.35314	1.94155	0.0185185	0.00413223	118.634	1.87423	0	0	0	112.915	0	149.569	0.362525	0	0.699253	0	2	9.41103	103.724	0	1.10128	0.00510204	1.27724	-0.280851	2.78e-16	7.62334	0.00617284	0	0	0.00411523	0	0	1.86623	0	0
78273	2.69	0	0	1.35	1.39439	0.111111	30.2702	1.13342	0.566622	0	0.0655556	0	0.285714	0.672201	6.71846	1.15397	0.0925926	0	100.845	2.25761	0	0	0	31.0837	0	144.63	0.51399	0	0.701754	0	5	7.73232	74.0896	0	1.08841	0	0.581665	-0.58762	0.0175157	7.06053	0.0625	0	0	0	0	0	0.110956	0	0
598787	2.93	0	0.2	0.45	0.6983	0.8	22.0564	0.972859	0.875048	0	0	0	0	0	0	1.55548	0.148148	0	84.7848	2.73216	0	0	1	0	0	150.397	0.789771	0	0.875048	1	1	0	31.0837	0	0.567919	0	0	-0.676598	5.55e-17	6.71846	0	1	0	0	0	0	0.158962	0	1
109524	3.12	0	0.5	1.311	1.2612	0.833333	23.4904	1.39544	0.787659	0	0.0533333	0	0	0.251247	6.71846	1.5587	0.0740741	0	98.0714	2.29162	0	0	1	31.0837	0	148.572	0.560646	0	0.816442	1	3	2.3811	91.1739	0	1.06866	0	0.321699	-0.751229	0.0772246	7.78726	0	0	0	0	0	0	0.532462	1.65096	0
121335	3.26	1	0.181818	0.589	1.2133	0.363636	44.2786	0.938306	0.882174	6	0.0637037	0	0.315789	1.07641	7.71945	1.1267	0.0952381	0	159.541	3.2211	0	0	1	49.6037	1	145.157	0.758275	0	0.916307	1	0	2.94168	125.926	0	0.755893	0	0.776726	-0.395528	0.0571133	7.98332	0.0472222	0	0	0	3	0	0.00214369	7.06555	1.65096
1071836	3.4	0	0.444444	-2.679	-1.8506	0.777778	30.7811	1.10561	0.893417	0	0.04	0	0	0.522299	9.47117	1.90701	0.0740741	0	121.764	3.35021	0	0	1	82.0136	0	157.235	0.803422	1	0.893417	2	0	0.5	137.357	0	0.931316	0	0.438013	-0.797736	0.0824001	8.7953	0.0666667	0	0	0	0	0	1.87224	1.1547	0
111137	3.55	0	0.625	2.714	2.5458	0.875	32.8647	1.49394	0.659681	0	0.032	0	0	0.869251	7.25331	1.56249	0.0555556	0	101.992	1.76386	0	0	0	90.8821	0	145.453	0.379826	0	0.756541	1	5	5.67624	99.8754	0	1.27018	0.0272109	0.497503	-0.332832	0.0682267	7.13927	0.0277778	0	0	0	0	0	1.74187	1.91926	0
2973764	3.59	1	0.166667	1.342	2.47659	0.416667	51.8128	0.763022	0.916307	6	0.0703704	0	0.315789	1.28882	7.71945	1.05066	0.0972222	0	197.395	3.53689	0	0	1	49.6037	1	144.099	0.832615	0	0.941087	1	0	1.5	160.667	0	0.484011	0	0.787163	-0.384287	0.0681837	8.24272	0.0337302	0	0	0	4	0	0.165161	6.60385	3.53278
119346	3.65	0	0.0909091	1.318	0.7416	0.363636	39.3288	0.712692	0.874007	6	0.0653333	0	0.352941	0.0301012	6.71846	0.84937	0.103704	0	144.995	3.29277	1	0	0	31.0837	0	157.477	0.805578	0	0.971218	1	0	1.65096	119.121	1	0.710113	0	0	-0.502578	0.0360415	8.63734	0.025	0	0	0	3	0	0.0204776	5.8538	1.65096
10031820	3.73	1	0.272727	1.093	2.39859	0.363636	46.9669	1.04415	0.79667	6	0.0477778	0	0.285714	0.807913	7.18507	1.20498	0.0683761	0	164.506	2.90569	0	0	1	114.369	1	143.124	0.661538	0	0.883402	1	0	5.92675	133.659	0	0.802696	0.0269388	0.746726	-0.289358	0.0625826	7.40479	0.0416667	0	0	0	2	0	0.588596	7.00379	0.333333
500221	3.82	1	0.125	-0.427	0.8941	0.125	32.5352	0.903921	0.958425	6	0.0503704	0	0.461538	5.62e-05	0	1.2214	0.0493827	0	118.986	2.65354	0	0	3	0	1	144.634	0.717089	0	1	1	0	4.94145	112.731	0	0.659564	0	0.819698	-0.181061	0.0775576	7.86287	0.0625	0	1	0	1	0	0.316631	3.49414	0
822866	3.92	0	0	2.71	2.7752	0.25	29.6734	0.997455	0.493729	0	0.111111	0	0.333333	0	0	1.38627	0.111111	0	99.1663	1.65774	0	0	0	0	0	143.557	0.397547	0	0.526906	0	6	3.96541	62.4429	0	0.522335	0	1.29114	-0.22045	1.11e-16	7.48138	0	2	0	0	0	0	0.0556016	4.29828	1
100527	4.03	1	0.125	1.063	1.4991	0.125	36.0296	0.882978	0.655469	6	0.0503704	0	0.428571	6.51e-05	0	0.928563	0.0493827	0	120.607	1.87025	0	0	1	0	1	139.974	0.491221	0	0.798231	1	0	7.73232	91.1739	0	0.737255	0	0.739242	-0.197604	0.0775576	7.78726	0.0625	0	0	0	1	0	1.03104	3.96541	0
35572782	4.12	0	0.142857	0.939	1.44782	0.428571	45.223	0.827308	0.788486	6	0.0684967	0	0.285714	0.203054	9.47117	0.954045	0.111111	0	168.473	3.36804	2	0	0	82.0136	1	158.625	0.766803	0	0.840036	2	0	0.5	126.861	1	0.593956	0	0.377576	-0.420191	0.0542895	8.69007	0.0448718	0	0	0	4	0	1.16575	5.11154	3.53278
583788	4.23	0	0	1.889	2.699	0.333333	41.9937	0.572771	0.818007	6	0.103333	0	0.461538	0	0	0.819079	0.111111	0	173.467	2.66123	0	0	0	0	0	142.362	0.719165	0	0.91685	0	0	1.65096	148.008	0	0.492575	0	0.620525	-0.546355	0.0232586	8.51809	0	0	0	0	3	0	2.48914	5.8538	1.65096
107200	4.37	1	0.333333	0.571	0.4241	0.666667	16.4715	0.963551	0.898227	0	0	0	0	0	0	1.69488	0.111111	0	0	2.52164	0	0	1	0	0	147.587	0.898227	0	0.612512	1	0	1	0	0	0.502409	0	0.806822	-0.125446	2.22e-16	0	0	0	0	0	0	0	0.12257	0	0
54576328	4.47	0	0.777778	3.714	3.2728	1	50.8156	1.26643	0.572755	0	0.0133333	2	0	0.764362	7.0266	1.20828	0.0277778	0	130.539	1.62669	0	0	0	101.158	0	142.845	0.338375	0	0.632187	0	2	5.89633	110.724	0	0.905107	0.0102041	1.27611	-0.0843674	1.17e-15	7.03774	0.0111111	0	0	0.0123457	0	0	1.77902	0	0
6358641	4.54	0	0.166667	1.381	1.9394	0.5	52.5088	0.930036	0.760367	6	0.0703704	0	0.272727	0.701161	8.05218	1.308	0.111111	0	183.058	3.20899	0	0	0	84.777	0	150.185	0.719596	0	0.801139	0	0	0.333333	130.293	1	0.600403	0.0204082	1.08489	-0.394427	6.11e-16	7.73729	0.0300926	0	0	0	4	0	0.177915	5.65685	3.30193
6361213	4.68	1	0.166667	1.224	2.48159	0.333333	43.9635	0.723902	0.925705	6	0.0630303	0	0.375	0.0337476	0	0.851167	0.111111	0	189.187	3.20282	1	0	1	0	1	147.433	0.800705	0	1	2	0	2.62074	181.195	0	0.459597	0	0	-0.235448	0.039418	9.1536	0.0585317	0	0	0	3	0	2.55169	7.48569	1.65096
7383199	4.8	0	0.428571	1.791	1.25029	0.714286	28.3602	1.28729	0.76556	0	0.04	0	0	0.810932	6.89587	1.31882	0.0952381	0	108.287	2.42322	0	0	0	68.2628	0	146.507	0.56068	0	0.85244	0	4	3.14735	102.33	0	1.21159	0	0	-0.551121	0.0822342	7.23477	0.0185185	1	0	0	0	0	0.311922	2.55577	0
538681	4.94	0	0.363636	4.645	3.4193	0.454545	49.2346	1.18182	0.683529	6	0.0215873	0	0.222222	0.920455	7.02686	1.18182	0.037037	0	120.37	2.30941	0	0	0	117.73	1	142.396	0.485692	0	0.816876	0	4	13.4157	118.479	0	1.18182	0.0120816	0.960048	-0.0175149	0.176942	7.00417	0.0150463	0	0	0.0204082	1	0	0.209306	4.79708	0
91941	5.11	0	0.0588235	1.556	3.8732	0.294118	76.0034	0.611973	0.64398	12	0.0616667	0	0.461538	1.21382	8.11233	0.751282	0.111111	0	192.218	2.81507	0	0	0	196.486	2	147.296	0.598896	0	0.754524	0	0	5.46963	182.596	2	0.532158	0.0269388	0.562838	-0.597113	9.99e-16	7.43456	0.0376984	0	0	0.0163769	4	0	0.576992	15.0081	5.26933
90595	5.52	1	0.0909091	2.284	2.7297	0.363636	52.7035	0.523343	0.931745	6	0.0724444	0	0.4	0.407343	0	0.719504	0.103704	0	240.666	3.1899	0	0	1	0	1	140.324	0.81648	0	1	1	0	1.19055	174.017	0	0.506123	0	0.731381	-0.411837	0.0736603	8.6665	0.015625	0	0	0	4	0	1.84335	6.99654	3.53278
13209159	5.99	0	0.166667	4.254	4.5812	0.5	70.5458	0.564494	0.653604	6	0.0501587	0	0.333333	0.931768	0	0.829558	0.0972222	0	269.968	2.50326	0	0	0	0	2	136.955	0.600313	0	0.706896	0	0	3.96541	247.224	0	0.538137	0	1.03672	-0.374002	7.22e-16	8.19035	0.03125	2	0	0	2	0	18.1255	6.87157	3.96541
104405	6.2	0	0.5	5.785	4.6853	0.625	62.4865	1.23578	0.606968	6	0.0285185	0	0.15	0.95771	7.11516	1.24803	0.0493827	0.00618985	118.245	2.41288	0	0	0	118.367	1	144.057	0.453384	0	0.742908	0	8	18.6068	115.851	0	1.19861	0.0101224	0	-0.46035	0.187678	7.02541	0.0132576	0	0	0.00718065	2	0	1.58156	7.14251	0.333333
58899	6.52	0	0	3.834	3.6444	0.5	54.081	0.630914	0.380094	0	0.0755556	0	0.333333	0	0	1.35246	0.148148	0	227.018	1.58496	0	0	0	0	0	141.979	0.380094	0	0.380094	0	6	0	196.344	0	0.511556	0	1.04987	0	2.22e-16	9.20212	0	6	0	0	0	0	17.3339	0	9.12547
34364426	6.65	0	0.228571	6.247	7.89118	0.285714	143.423	0.935621	0.571073	24	0.0313889	0	0.491228	1.00838	7.6467	1.11647	0.0509259	0.0027641	194.287	2.61748	0	0	0	211.885	3	140.159	0.448744	0	0.754722	1	0	26.7036	204.196	0	0.760176	0.0169351	0.475405	-0.85792	0.00349243	7.99991	0.0260744	1	0	0.0107054	4	0	17.3106	26.3785	5.81388
67561	0.04	0	0	-0.499	-0.3915	1	8.2613	1.87574	0.693426	0	0	0	0	0	0	2.40192	0	0	0	1.79248	0	0	0	0	0	159.579	0.693426	0	0.360093	0	0	0	0	0	1.29477	0	1.35714	-0.516463	0	0	0	0	0	0	0	0	0.128164	0	0
78966	1.47	0	0.25	-0.815	-0.6741	1	20.7955	1.49905	0.835752	0	0	0	0	0	0	1.7343	0.111111	0	54.5454	2.55666	0	0	0	0	0	159.215	0.671505	0	0.835752	0	1	0	31.0837	1	1.33262	0	0.924416	-0.585978	0.0608102	6.71846	0	1	0	0	0	0	1.43449	1	0
109068	2.02	0	0	0.14	1.56952	0.142857	31.8628	1.02507	0.82159	6	0.111111	0	0.428571	0	0	1.29339	0.0555556	0	107.111	2.55666	0	0	1	0	0	145.225	0.671505	0	0.910795	0	0	3.96541	61.503	0	0.88378	0	0.844794	-0.244862	0.0114498	6.86362	0	0	1	0	1	0	0.11758	2.14914	0
6636788	2.32	0	0	0.824	1.4406	0.25	33.8957	0.684733	0.95351	6	0.111111	0	0.5	0	0	1.18963	0.111111	0	138.656	3.02206	0	0	2	0	0	148.201	0.842981	0	1	0	0	2.3811	88.2488	0	0.513815	0	0.741748	-0.562206	2.22e-16	8.07862	0	0	1	0	2	0	0.527802	2.94168	1
6602320	2.57	0	0	0.631	1.5497	0.25	36.4497	0.625205	0.95351	6	0.111111	0	0.5	0	0	1.09259	0.111111	0	150.343	3.02206	0	0	2	0	0	147.118	0.842981	0	1	0	0	2.3811	93.9252	0	0.474884	0	0.746049	-0.551539	5.55e-17	7.91273	0	0	1	0	2	0	0.00552049	2.94168	1
123386	2.65	1	0.333333	0.587	0.5953	0.666667	16.7418	1.48745	0.796658	0	0	0	0	0	0	1.66663	0.111111	0	56.5487	2.16096	0	0	1	0	0	147.296	0.650515	0	0.696658	1	1	1	0	0	1.0381	0	0	-0.249499	2.22e-16	0	0	0	0	0	0	0	0.0112997	0	0
107062	2.86	0	0.333333	1.74	1.464	1	20.6556	0.886911	0.5	0	0	0	0	0	0	1.89131	0.111111	0	0	1.5	0	0	0	0	0	147.332	0.5	0	0.333333	0	0	1	0	0	0.500325	0	1.16667	-0.0669474	2.22e-16	0	0	0	0	0	0	0	2.28554	0	0
16672870	3.05	0	0.333333	-0.552	0.8212	0.833333	24.5313	1.01645	0.8337	0	0	0	0	0	0	1.75189	0.0833333	0	116.73	2.77736	0	0	0	0	0	150.182	0.750549	0	0.8337	1	0	1	62.4429	0	0.751935	0	0.352792	-0.835421	0.14543	7.48138	0	0	0	0	0	0	0.254722	0	0
65452	3.13	0	0.1	0.609	0.4911	0.3	38.7827	0.754317	0.827306	6	0.0377778	0	0.352941	0.340715	6.71846	0.848548	0.102564	0	154.907	3.02864	0	0	1	31.0837	1	150.051	0.740958	0	0.942435	1	0	3.96541	100.934	1	0.823391	0	0.533979	-0.652635	0.0515001	8.03483	0.0625	0	0	0	2	0	9.8e-05	5.55316	2.3811
131113	3.39	0	0.285714	0.946	1.2598	0.428571	52.4924	1.03812	0.659123	6	0.0390123	0	0.25	1.34588	7.84113	1.31623	0.111111	0	196.874	2.85539	0	0	2	81.7751	2	144.402	0.622772	0	0.695474	2	0	3.96541	183.091	0	0.691147	0.0201361	0.622682	-0.574483	0	8.59373	0.0337302	0	0	0	2	0	1.0704	6.87157	3.96541
459596	3.51	0	0.111111	0.903	1.8674	0.333333	39.408	0.985653	0.758877	6	0.0855556	0	0.352941	1.09465	10.368	1.01166	0.0808081	0	134.416	2.86659	0	0	0	74.1835	0	150.222	0.701312	1	0.845224	0	0	3.30193	94.0255	0	0.772433	0	0.583446	-0.425429	0.0568238	7.21714	0.0590278	0	0	0	2	0	0.300633	5.65685	0.333333
99081	3.63	0	0.1	1.636	1.48182	0.3	38.4555	0.945278	0.816442	6	0.0660317	0	0.352941	8.87e-05	0	0.945804	0.0854701	0	132.292	2.86659	1	0	0	0	1	148.172	0.701312	0	0.931571	1	0	3.53278	128.116	0	0.653538	0	0.334414	-0.214582	0.0440003	8.19654	0.03125	0	0	0	2	0	4.25638	5.11154	0.5
578461	3.8	0	0.0909091	1.791	1.06402	0.363636	42.0053	0.880576	0.832615	6	0.0493333	0	0.315789	0.327881	9.47117	0.941247	0.103704	0	138.533	3.28663	1	0	0	82.0136	1	153.934	0.773702	0	0.891527	1	0	1.65096	104.289	1	0.72699	0	0.353488	-0.475397	0.0198784	8.13777	0.0787037	0	0	0	3	0	0.750649	5.8538	1.65096
120616	4.13	0	0.285714	0.524	1.2598	0.428571	52.4924	1.03812	0.622772	6	0.0330159	0	0.25	1.15797	7.9923	1.31623	0.123457	0	176.809	2.85539	0	0	2	115.584	2	144.402	0.622772	0	0.659123	2	0	3.30193	168.073	0	0.691147	0.0405442	0.618533	-0.611821	3.75e-16	8.02647	0.0462963	0	0	0.00617284	2	0	1.0704	8.59656	2.40685
122032	4.35	1	0.181818	2.423	2.6225	0.363636	49.0773	1.06116	0.716367	6	0.0527778	0	0.26087	0.761971	7.76654	1.09999	0.0952381	0	131.877	2.7296	0	0	1	136.371	2	141.685	0.603418	0	0.774036	1	0	4.88359	103.859	0	0.929355	0.0272109	0.613261	-0.215391	0.0313481	7.15827	0.0746528	1	0	0	2	0	1.93961	8.04133	1.31037
90153	4.49	0	0	1.877	2.5454	0.0833333	50.7583	0.761313	0.638694	10	0.0483951	0	0.526316	0.677309	6.71846	0.760179	0.0833333	0	168.43	2.07409	0	0	0	31.0837	2	140.256	0.488259	0	0.832615	0	0	8.73703	119.248	0	0.799098	0	0.605429	-0.474598	0.0186459	7.41498	0.0208333	0	0	0	1	0	1.91739	10.1274	2.3811
618622	4.63	0	0.0909091	2.187	2.7606	0.363636	43.6059	0.614099	0.798231	6	0.0733333	0	0.428571	0.000126	0	0.810514	0.0740741	0	221.288	2.84237	1	0	0	0	0	147.977	0.746547	0	0.887436	1	0	1.5	251.52	0	0.469615	0	0.360411	-0.297633	0.065012	10.7946	0.0208333	0	0	0	3	0	5.54179	6.24025	1.5
91576	4.82	0	0	3.616	2.86782	0.0833333	53.4348	0.867769	0.640484	10	0.0694444	0	0.47619	1.10526	6.86362	0.867769	0.0694444	0	149.965	2.19909	0	0	0	61.503	3	138.762	0.500666	0	0.801985	0	0	8.78097	127.594	0	0.867769	0.04	0.783179	-0.046799	0.0241558	7.04343	0.0208333	0	0	0	1	0	5.73219	10.6179	1.65096
29232937	5.09	0	0.368421	2.46	2.78261	0.631579	79.1855	1.23163	0.748827	6	0.0389744	0	0.153846	1.03793	7.57064	1.8387	0.0854701	0	178.799	2.95949	0	0	1	133.861	0	149.721	0.559936	0	0.748827	0	0	0.814325	168.822	0	0.603312	0.0270165	0.891602	-0.816417	0.0251009	7.79489	0.0353261	0	1	0.00987654	3	0	1.90633	3.68766	1.5
10222012	5.39	0	0.142857	0.209	0.48138	0.571429	33.7783	0.363139	0.879588	0	0	0	0	0	0	0.865233	0.177778	0	161.714	2.92193	0	0	1	0	0	155.065	0.879588	0	0.879588	1	1	0	86.9662	1	0.598619	0	0.599568	-0.436288	0.0192254	8.27885	0	0	0	0	0	0	0.828646	0.5	0
57055397	5.76	0	0.115385	5.398	5.1819	0.346154	99.2735	1.01827	0.781891	6	0.0543735	0	0.28	0.863409	7.29126	1.21052	0.135501	0.00472255	177.335	3.04753	0	0	1	135.708	3	142.23	0.539973	0	0.868815	1	5	7.01658	150.023	0	0.630485	0.0299755	0.48631	-0.358929	0.186697	7.50001	0.0349151	3	0	0.0201772	3	0	8.31919	17.4374	6.20833
123319	6.4	0	0	0.654	1.0978	0.25	34.1668	0.77589	0.587265	6	0.151111	0	0.428571	0.000133	6.71846	0.81364	0.0888889	0	101.895	2.23593	0	0	0	31.0837	0	146.451	0.587265	0	0.662308	0	0	3.30193	70.2629	0	0.866129	0	0.606667	-0.579655	1.11e-16	7.5442	0	0	0	0	2	0	0.0768398	5.65685	0.333333
52645531	7.39	1	0.25	4.534	6.20078	0.392857	113.628	0.888449	0.737118	12	0.0444949	0	0.413043	0.963724	7.3944	1.10599	0.102102	0.0109515	166.14	3.28513	0	0	2	177.713	1	141.331	0.594748	0	0.849401	1	0	13.4274	195.72	0	0.561919	0.019229	0.595468	-0.532899	0.0422825	8.04453	0.017908	2	0	0.0131366	3	0	12.7513	16.5227	5.31625
78875	2.95	0	0.25	2.037	1.8525	1	25.24	0.99701	0.769934	0	0	0	0	0	0	1.76079	0.111111	0	62.4429	1.86763	0	0	0	0	0	146.436	0.539867	0	0.604006	0	1	0	0	0	0.509293	0	0	-0.194885	0.0608102	0	0	1	0	0	0	0	2.2533	1	0
98011	3.66	1	0.142857	0.418	1.0921	0.142857	27.1196	0.910178	0.947443	5	0.0625	0	0.454545	0	0	1.16851	0.0555556	0	134.287	2.55034	0	0	2	0	0	143.609	0.737214	0	1	1	0	3.30193	56.5487	0	0.607528	0	0.83398	-0.254614	0.124334	8.09482	0	0	0	0	1	0	0.143414	2.82843	0
1891958	3.89	0	0	1.53	1.96247	0.272727	46.9722	0.5087	0.849915	6	0.0804938	0	0.428571	1.02051	8.27885	0.763857	0.103704	0	239.927	3.23593	0	0	0	86.9662	1	142.002	0.849915	0	0.924957	0	0	1.5	194.591	0	0.506386	0	0.545233	-0.458734	0.115127	8.84132	0.0295139	0	0	0	4	0	2.00732	6.60385	3.53278
14548459	4.11	0	0.125	0.896	3.0751	0.1875	68.8572	0.723316	0.786003	12	0.0382222	0	0.565217	1.07441	7.37983	0.975303	0.0846561	0	202.161	2.71879	0	0	2	174.624	2	140.008	0.601028	0	0.915852	1	0	8.60927	222.502	0	0.459374	0.016	0.69817	-0.296756	0.0200504	7.76623	0.0192308	0	1	0.0123457	3	0	1.0535	12.6136	2.7016
51285	4.29	0	0.153846	2.027	0.9266	0.384615	38.9967	0.734518	0.845224	6	0.052381	0	0.352941	0.0299569	9.47117	0.846211	0.111111	0	174.861	3.05748	2	0	0	82.0136	0	157.511	0.748013	0	0.942435	2	0	1.65096	157.262	0	0.538972	0	0.495133	-0.382552	0.0483912	9.54344	0.0648148	0	0	0	3	0	1.60504	5.8538	1.65096
94622	4.56	4	0.173913	2.518	2.74068	0.173913	82.026	1.03012	0.731482	6	0.028545	0	0.5	0.984297	7.43007	1.35174	0.0666667	0.00588861	153.806	2.99499	0	0	1	161.581	1	144.498	0.562765	0	0.859074	1	3	18.1276	150.071	0	0.79296	0.0117581	0.627742	-0.492528	0.0592209	7.48625	0.0157353	0	1	0.00727356	3	0	0.403479	13.0602	1.7402
1929733	5	0	0.5	3.073	3.7321	0.65	79.6663	1.05379	0.794307	6	0.0364912	0	0.157895	0.881476	7.95417	1.48084	0.0740741	0.00596311	167.869	3.11982	0	0	1	164.692	0	145.168	0.594486	0	0.895924	1	2	7.81537	145.488	0	0.576864	0.0119568	0.770746	-0.39211	0.246047	7.9304	0.0249183	0	0	0.00821753	3	0	0.363609	8.64468	2.18225
528290	5.45	0	0.166667	1.25	1.221	0.333333	37.3912	0.824382	0.6875	6	0.0501587	0	0.375	0.000113	0	0.859913	0.0972222	0	184.954	2.5	2	0	0	0	0	155.767	0.625	0	0.75	2	0	3.96541	154.611	0	0.45834	0	0.423518	0.00049	3.33e-16	10.1362	0.03125	0	0	0	2	0	3.3489	4.29828	1
120627	5.64	0	0.434783	4.099	5.3212	0.521739	87.2709	1.18717	0.711955	6	0.0351449	0	0.18	1.00477	7.41327	1.32664	0.0689655	0.00369183	139.65	2.70154	0	0	0	133.685	1	143.214	0.478669	0	0.824553	1	8	14.6993	134.763	0	0.936903	0.0175488	0.656364	-0.369876	0.285622	7.28056	0.0200132	1	0	0.00903978	3	1	4.45843	11.2608	2.40685
26530201	6.18	2	0.5	4.103	3.27719	0.571429	52.8007	1.2227	0.652933	0	0.0205	1	0.151515	0.909184	7.2885	1.51435	0.0694444	0.00666667	123.875	2.40813	0	0	2	123.769	0	145.405	0.477388	0	0.767189	1	6	11.4475	120.523	0	0.866866	0.0120465	0.484945	-0.499171	0.212361	7.20633	0.0150617	0	0	0.00932356	0	0	3.49391	2.5649	0
101202	6.54	0	0.2	2.451	5.89089	0.35	84.6582	0.654122	0.652535	12	0.0502924	0	0.535714	0.808416	7.94478	1.10315	0.0740741	0.0103221	193.781	2.84976	0	0	0	242.749	0	146.024	0.592791	2	0.804877	1	0	5.43714	198.661	0	0.485711	0.0227551	0.480774	-0.773913	0.0508317	8.22824	0.0269608	0	0	0.0150332	5	0	5.71975	12.7802	3.83671
71238	1.12	0	0.333333	0.282	0.3887	1	16.0871	1.64606	0.79649	0	0	0	0	0	0	1.77817	0.111111	0	50.7873	1.94734	0	0	0	0	0	151.27	0.543196	0	0.79649	0	1	1	31.0837	0	1.37411	0	0.962043	-0.507115	2.22e-16	6.71846	0	0	0	0	0	0	0.469773	0	0
4412913	2.29	0	0.142857	-0.147	0.4324	0.285714	26.7964	0.972209	0.91685	5	0.0625	0	0.384615	0	0	1.2025	0.0555556	0	94.5506	3.02699	0	0	2	0	1	147.539	0.818007	0	0.958425	0	0	3.14735	57.5856	0	0.811777	0	1.12192	-0.372898	0.124334	7.56197	0	0	0	0	1	0	0.818663	3.36359	0
88686	2.54	0	0.1	-0.231	0.3677	0.3	40.727	0.761671	0.760188	6	0.0377778	0	0.333333	0.252669	6.71846	0.871371	0.102564	0	148.994	2.72548	0	0	1	31.0837	1	153.96	0.653604	0	0.920063	1	0	3.96541	95.6037	2	0.878503	0	0.468837	-0.700996	0.0515001	7.83311	0.0625	0	0	0	2	0	0.389002	5.55316	2.3811
100618	3.03	0	0.125	0.998	1.7283	0.25	39.2802	1.0228	0.667284	6	0.0503704	0	0.352941	0.632698	6.71846	1.23648	0.0493827	0	124.982	2.44192	0	0	0	31.0837	0	147.688	0.597418	1	0.805578	0	0	6.08364	88.2833	0	0.998687	0	1.11263	-0.319042	0.0775576	7.00299	0.0625	0	0	0	1	0	0.407682	3.04182	0
100663	3.24	0	0.125	1.267	2.19599	0.25	37.5993	1.03762	0.638759	6	0.0503704	0	0.375	0.760475	6.71846	1.19224	0.0493827	0	133.168	2.25161	0	0	0	31.0837	0	143.277	0.562904	0	0.78891	0	0	6.08364	92.8941	0	0.863464	0	0	-0.253695	0.0775576	7.09447	0.0625	0	0	0	1	0	0.818663	3.04182	0
10293068	3.53	0	0	2.531	2.7751	0.307692	51.1352	1.01808	0.699885	0	0.031746	0	0.259259	0	0	1.18476	0.183575	0	115.38	2.33421	0	0	0	0	0	142.07	0.490908	0	0.795418	1	3	1	51.9733	0	0.488674	0	0.468565	-0.285194	0.0809781	7.21104	0	2	0	0	0	0	2.77622	2.94168	2.3811
89623	3.79	0	0.0909091	1.791	1.06402	0.363636	42.0053	0.880576	0.832615	6	0.0653333	0	0.315789	0.323561	6.71846	0.941247	0.103704	0	138.533	3.28663	1	0	0	31.0837	1	153.934	0.773702	0	0.891527	1	0	1.65096	114.08	1	0.72699	0	0.353488	-0.473308	0.0360415	8.14945	0.025	0	0	0	3	0	0.750649	5.8538	1.65096
2212671	3.84	0	0.25	1.948	1.9685	0.333333	46.2974	1.24893	0.682322	0	0.0195	1	0.241379	1.237	6.93919	1.52753	0.0793651	0	126.123	2.11705	0	0	0	88.3492	0	146.258	0.435789	0	0.739108	1	4	8.68816	123.765	0	0.879681	0.0138889	0.584888	-0.693576	0.119702	7.55636	0.02	0	0	0	0	0	0.0911436	2.5571	0
80433	4.24	0	0.238095	3.602	4.123	0.428571	87.0074	1.06898	0.497748	12	0.0374074	0	0.380952	1.1106	7.05429	1.1124	0.111111	0.00408122	148.182	2.45284	0	0	0	128.415	2	142.864	0.454877	0	0.58261	0	0	10.9633	150.671	0	0.924063	0.0248526	0.766165	-0.164249	2.78e-17	7.42561	0.0332126	0	0	0.00644279	2	0	19.6852	6.00002	0.2
114261	4.38	0	0.333333	1.689	2.192	0.533333	60.9151	1.14958	0.767234	6	0.050719	0	0.2	1.17998	7.42471	1.50635	0.0701754	0	172.701	3.13291	0	0	0	108.94	0	148.325	0.638472	1	0.807993	1	1	3.96541	192.98	0	0.852162	0.031243	0.494815	-0.74886	0.0584613	7.92052	0.0204248	1	0	0	2	0	0.181646	5.91148	2.52506
108703	4.74	0	0	2.547	3.6468	0.333333	45.1044	0.564898	0.557886	6	0.0555556	0	0.5	0	0	0.895412	0.0555556	0	277.947	2	0	0	0	0	0	138.183	0.557886	0	0.557886	0	0	1.5	125.161	0	0.486382	0	0.966801	-0.462829	4.44e-16	9.0072	0	0	0	0	3	0	6.29759	6.24025	1.5
2475469	5.47	0	0.166667	0.023	1.9079	0.25	90.6643	0.844276	0.788063	12	0.055935	0	0.368421	1.17857	7.78536	1.07307	0.0784314	0.0123457	221.225	3.4408	0	0	0	153.604	4	146.031	0.655648	2	0.855808	2	0	7.12814	196.897	0	0.771905	0.0162286	0.704529	-0.367703	0.223811	7.88793	0.0325397	0	0	0.0109179	6	0	0.327642	19.091	14.4651
68359375	8.6	1	0.225806	4.008	6.40296	0.387097	118.565	0.852145	0.78925	12	0.048082	0	0.404255	1.13254	7.72276	0.966278	0.116402	0.0098925	184.801	3.65972	0	0	2	203.548	1	142.128	0.658865	0	0.884073	1	1	10.2044	215.557	0	0.530463	0.0224025	0.532239	-0.476393	0.00433414	8.24955	0.0263307	3	0	0.0118989	4	0	11.2004	19.6294	9.42908
109999	1.52	0	0	0.526	0.7968	0	16.8667	1.40078	0.584249	0	0	0	0.384615	0	0	1.66913	0	0	31.0837	1.54659	0	0	0	0	0	147.081	0.417949	0	0.584249	0	2	4.24264	0	0	1.04646	0	1.51784	-0.181528	0	0	0	0	0	0	0	0	0.499708	0	0
563804	2	0	0.2	0.731	1.2314	0.8	25.857	1.49112	0.652115	0	0	0	0	0	0	1.59998	0.148148	0	74.7309	1.79879	0	0	0	0	0	146.116	0.449699	0	0.652115	1	0	0	31.0837	0	1.17093	0	0.518951	-0.423323	4.44e-16	6.71846	0	1	0	0	0	0	0.230784	0	1
108894	2.36	0	0	0.351	1.10962	0.142857	31.6683	1.02507	0.873274	6	0.111111	0	0.428571	0	0	1.29339	0.0555556	0	92.6914	2.75343	0	0	2	0	1	145.225	0.723188	0	0.910795	0	0	3.30193	46.3244	0	0.88378	0	0.926145	-0.144414	0.0114498	7.14402	0	0	1	0	1	0	0.027225	2.82843	0
75218	2.72	0	0	-0.19	0.0166	0	11.0435	1.3197	0.491133	0	0	0	0.428571	0	0	1.80398	0	0	0	1.37878	0	0	0	0	0	149.424	0.491133	0	0.491133	0	0	1	0	0	0.81517	0	1.56	-0.190952	2.22e-16	0	0	0	0	0	0	0	0.0171348	0	0
150787	3.07	0	0.2	1.296	1.7038	0.4	44.2428	1.12189	0.566053	6	0.0637037	0	0.3	0.792763	9.19536	1.38817	0.0740741	0	155.765	2.44644	0	0	0	130.8	0	145.268	0.566053	0	0.612328	0	0	3.30193	101.042	0	0.838668	0.0204082	1.33391	-0.282096	5e-16	7.16283	0.0601852	0	0	0	2	0	0.164998	5.65685	0.333333
121697	3.28	0	0.111111	1.561	1.7526	0.333333	44.5749	1.14767	0.584973	6	0.0382222	0	0.3	0.720753	6.71846	1.52092	0.0808081	0	122.014	2.28548	0	0	0	31.0837	0	146.804	0.528809	0	0.696146	0	0	6.08364	97.1199	0	1.01758	0	0	-0.0625396	0.030857	7.00911	0.0625	0	0	0	1	0	1.37922	3.04182	0
57432	3.42	0	0.25	2.079	1.185	0.4375	56.3816	1.21524	0.687588	0	0.0507071	0	0.176471	1.30879	7.88916	1.59576	0.125604	0	133.79	2.60909	0	0	2	91.9172	0	150.031	0.512847	2	0.790346	3	3	1.65096	123.128	0	0.901039	0.00935636	0.444345	-0.722488	0.213931	7.63034	0.0472222	1	1	0	0	0	0.00218089	4.62881	1.9827
104870	3.56	1	0.111111	1.455	1.52712	0.222222	40.3116	0.956513	0.730095	6	0.0855556	0	0.352941	1.8917	8.09482	0.999992	0.0808081	0	117.598	2.65426	0	0	1	56.5487	2	140.746	0.649365	0	0.816442	1	0	4.88359	92.2254	0	0.814144	0	0.66186	-0.194131	0.0568238	7.34288	0.0590278	0	0	0	2	0	2.13686	6.59754	0.333333
91656	3.86	0	0.272727	2.737	2.6609	0.454545	40.8349	1.49961	0.578225	0	0.0191111	0	0.1875	0.7546	6.8135	1.7885	0.0854701	0	120.851	1.62974	0	0	0	51.0011	0	147.528	0.325948	0	0.656128	0	6	8.56995	94.6985	0	1.36468	0.04	1.16116	-0.0935755	0.0342115	6.98249	0.0300926	1	0	0	0	0	0.595675	4.02644	0
91667	3.96	0	0.272727	2.407	2.5328	0.454545	53.1625	1.21443	0.624632	6	0.0191111	0	0.230769	0.784304	6.85152	1.51749	0.0854701	0	157.388	2.37588	0	0	0	58.968	0	146.237	0.505459	0	0.703263	0	0	8.56995	114.491	0	1.102	0.04	0.969116	-0.144617	0.0342115	7.03695	0.0300926	0	0	0	1	0	2.80629	4.02644	0
90120	4.2	0	0	3.616	2.86782	0.0833333	53.4348	0.867769	0.6323	10	0.0483951	0	0.47619	0.694215	6.71846	0.867769	0.0833333	0	164.588	2.19909	0	0	0	31.0837	3	138.762	0.500666	0	0.801985	0	0	8.73703	114.903	0	0.867769	0	0.864198	-0.0563833	0.0186459	7.03325	0.0208333	0	0	0	1	0	5.73219	10.1274	2.3811
590863	4.42	1	0.4	1.664	1.2314	0.8	25.1109	1.49112	0.69516	0	0	0	0	0	0	1.59998	0.0888889	0	69.3699	2.09192	0	0	1	0	0	146.116	0.522979	0	0.69516	1	1	1	56.5487	0	1.17093	0	0.605145	-0.224556	0.0761289	8.09482	0	1	0	0	0	0	0.172474	1.41421	0
51218452	4.54	0	0.368421	2.081	3.41081	0.631579	82.6396	1.16598	0.828032	6	0.0525253	0	0.146341	1.14615	7.383	1.55788	0.0977778	0	185.245	3.05949	0	0	1	90.7237	2	146.031	0.571062	0	0.867889	1	2	4.37049	175.601	0	0.730005	0.0173372	0.702868	-0.315856	0.120534	7.6128	0.0232205	1	0	0.0102041	3	0	1.91186	11.2832	4.88359
89838	4.67	0	0.0909091	2.487	2.91421	0.454545	49.891	1.10608	0.750039	6	0.0493333	0	0.24	0.587572	7.0378	1.12009	0.103704	0	131.679	2.77469	0	0	0	98.006	2	143.883	0.597498	0	0.790996	0	0	1.65096	103.52	0	1.07502	0	0.492044	-0.532856	0.0198784	7.49441	0.0787037	1	0	0	3	0	2.7689	6.8308	3.14735
112209	4.82	0	0.777778	3.629	2.6957	1	35.2142	1.55516	0.520332	0	0.0133333	0	0	0.923923	7.02334	1.57067	0.0277778	0	98.0763	1.65219	0	0	0	89.2111	0	149.421	0.333494	0	0.63873	0	7	11.2406	96.0077	1	1.54743	0.0102041	0.920412	-0.471258	1.17e-15	7.0125	0.0111111	0	0	0.0123457	0	0	7.30621	0	0
471772	5.31	1	0.0416667	5.776	5.20268	0.25	90.2818	1.15973	0.749551	0	0.0531111	0	0.269231	0.722463	7.16827	1.18944	0.128655	0	146.17	2.73476	0	0	1	113.289	3	142.998	0.479745	0	0.861618	1	7	9.12534	118.458	0	1.0663	0.0298604	0.294524	-0.593254	0.181353	7.1962	0.0375958	2	0	0.021472	0	0	4.61562	16.7051	4.77054
609234	5.59	0	0	3.804	3.206	0.4	69.5198	0.410345	0.776432	6	0.0749206	0	0.461538	2.94011	0	0.421437	0.111111	0	406.154	2.66123	0	0	0	0	0	135.276	0.719165	0	0.875275	0	0	0.5	169.628	0	0.572486	0	0.656084	-0.570204	0.0319804	7.51775	0	0	0	0	4	0	2.84867	5.11154	3.53278
2310170	6.06	0	0.318182	3.904	4.38379	0.454545	87.9281	0.912281	0.805152	6	0.0333333	1	0.25	0.959461	7.63717	1.32607	0.09319	0.0144373	223.873	3.54411	0	0	0	162.869	0	144.175	0.685525	0	0.830699	1	0	3.45315	207.541	0	0.449747	0.0213662	0.669424	-0.750625	0.102184	8.07508	0.0388043	0	0	0.0139056	3	0	5.8245	7.79089	2.80397
13071799	7.34	0	0.571429	4.501	4.1769	0.928571	76.9518	1.16341	0.573612	0	0.02	2	0	1.39726	7.70924	1.26374	0.0935673	0	153.768	2.17414	0	0	0	117.343	0	143.117	0.420536	0	0.651865	0	0	0.75	153.689	0	0.59359	0.0174927	1.23697	-0.64812	0.0871746	7.52804	0.0462963	0	0	0	0	0	13.6434	0	0
111466	0.15	0	0.666667	-1.398	-1.0124	1	25.5971	1.50131	0.539481	0	0.0266667	0	0	0.347403	7.63603	1.96486	0.0444444	0	112.36	1.96982	0	0	0	48.0604	0	153.894	0.481917	0	0.654611	0	0	2.94168	93.5302	0	1.06949	0	1.16189	-0.415958	1.11e-16	7.7203	0.0277778	0	0	0	0	0	1.0574	0	0
67630	0.84	0	0	0.384	0.3871	1	17.7599	1.64606	0.592981	0	0	0	0	0	0	1.77817	0	0	31.0837	1.78067	0	0	0	0	0	151.27	0.496706	0	0.509648	0	1	0	0	0	1.37411	0	0.764665	-0.561096	0	0	0	1	0	0	0	0	0.166546	0	0
75650	1.06	0	0	0.801	0.7772	1	22.0651	1.61168	0.432043	0	0	0	0	0	0	1.70479	0	0	31.0837	1.68794	0	0	0	0	0	149.787	0.432043	0	0.365376	0	0	0	0	0	1.39465	0	0.578746	-0.608492	1.11e-16	0	0	0	0	0	0	0	0.328673	0	0
111422	1.35	0	0.666667	-1.594	-1.4394	1	27.278	1.48848	0.68025	0	0.0266667	0	0	0.328831	7.63603	2.0474	0.0444444	0	98.4383	2.39215	0	0	0	48.0604	0	157.681	0.573667	1	0.68025	0	0	2.94168	87.8532	0	1.19216	0	1.05008	-0.473382	1.11e-16	7.62922	0.0277778	0	0	0	0	0	1.67599	0	0
96220	1.75	0	0.4	0.691	1.3755	0.8	26.2418	1.49112	0.57016	0	0	0	0	0	0	1.59998	0.133333	0	104.157	1.67379	0	0	0	0	0	146.116	0.418449	0	0.57016	1	2	0.5	58.968	0	1.17093	0	0	-0.410257	2.22e-16	6.85152	0	0	0	0	0	0	0.00839056	2	0
109897	1.93	0	0.5	0.67	0.6158	1	23.281	1.72916	0.57016	0	0	0	0	0	0	2.10152	0.0740741	0	89.6057	1.67379	0	0	0	0	0	153.985	0.418449	1	0.57016	0	0	0.5	58.968	0	1.54145	0	1.23568	-0.343401	1.11e-16	6.85152	0	0	0	0	0	0	0.081225	0	0
105599	2.08	0	0.571429	-1.355	-1.0972	1	32.5727	1.57487	0.688256	0	0.016	0	0	0.228966	7.63603	2.27343	0.0952381	0	99.8956	2.19928	0	0	0	48.0604	0	155.298	0.500711	0	0.688256	0	0	2.94168	74.1291	0	1.19049	0	0.988004	-0.403833	2.02e-17	7.65224	0.0277778	0	0	0	0	0	0.575626	0	0
77747	2.18	0	0.333333	1.517	1.5574	1	28.2207	1.57588	0.560604	0	0	0	0	0	0	1.63345	0.138889	0	81.189	1.77991	0	0	0	0	0	148.155	0.405232	0	0.650205	0	2	0.5	43.0342	0	1.42062	0	0.707735	-0.589606	2.06e-16	6.77549	0	0	0	0	0	0	0.606997	0	0
75047	2.3	0	0	-0.143	-0.035	1	14.2126	1.73047	0.736452	0	0	0	0	0	0	1.91177	0	0	31.0837	1.96096	0	0	0	0	0	161.261	0.590309	0	0.636452	0	0	0	0	1	1.6413	0	0.920973	-0.604627	4.44e-16	0	0	0	0	0	0	0	0.157768	0	0
62555	2.44	0	0	-0.24	0.2924	0.666667	20.8568	0.879182	0.76323	0	0	0	0	0	0	0.878895	0	0	31.0837	2.41938	0	0	1	0	0	157.72	0.76323	0	0.652119	0	0	0	0	1	0.621615	0	0.599812	-0.779422	0	0	0	0	0	0	0	0	0.0751856	0	0
928972	2.57	2	0.5	1.473	1.26119	0.833333	29.3173	1.41503	0.767628	0	0.0266667	0	0	0.768166	7.4399	1.46169	0.0444444	0	109.279	2.43059	0	0	0	50.7873	0	147.603	0.572184	0	0.817188	0	2	5.67624	98.5419	0	1.2979	0	0.985887	-0.436071	1.11e-16	7.19159	0.0277778	0	0	0	0	0	0.255631	0	0
499832	2.72	0	0.166667	-0.569	0.88319	0.333333	40.9315	0.736012	0.845224	6	0.0492929	0	0.352941	0.494331	8.5536	1.11826	0.0972222	0	200.034	3.05748	0	0	2	65.037	0	148.894	0.748013	0	0.971218	2	0	2.3811	175.024	0	0.702766	0	0.456596	-0.66839	5.55e-16	8.71492	0.0590278	0	1	0	2	0	0.0412496	5.24148	2.94168
600362	2.85	0	0.285714	1.694	1.6593	1	34.4981	1.56539	0.5	0	0	0	0	0	0	1.61354	0.148148	0	86.9381	1.72649	0	0	0	0	0	147.658	0.376555	0	0.5	0	1	0	72.9102	0	1.42934	0	0.810001	-0.536516	3.26e-16	6.91805	0	3	0	0	0	0	0.403352	0	2.3811
111911	2.97	0	0.75	1.497	1.4547	1	37.5521	1.18315	0.677861	0	0.016	0	0	1.53652	7.62954	2.13731	0.031746	0	137.903	2.07849	0	0	0	118.458	0	149.457	0.489295	0	0.677861	0	0	3.68599	126.826	0	0.544025	0.0136054	0	-0.299099	2.22e-16	8.192	0.0138889	0	0	0	0	0	1.51856	0	0
253521	3.12	0	0	1.766	1.6298	0	43.6176	0.796626	0.6875	10	0.0474074	0	0.625	0.118198	0	0.861495	0.0634921	0	155.218	2.15564	0	0	2	0	2	145.391	0.53891	0	0.75	0	0	6.67872	102.208	0	0.655954	0	0.924945	0.119677	2.78e-17	7.46488	0	0	1	0	0	0	0.890758	7.06555	1
64675	3.21	0	0.5	-0.982	0.618	0.75	31.323	1.51789	0.609596	0	0.0114286	0	0	1.36013	6.85152	2.24425	0.111111	0	161.65	2.07849	0	0	0	58.968	0	147.546	0.489295	0	0.609596	2	0	0.25	115.926	0	0.819386	0	0.359907	-1.03595	1.6e-16	8.91802	0.0277778	0	0	0	0	0	0.119025	0	0
111262	3.25	0	0.666667	1.922	1.5254	1	26.4794	1.58215	0.645747	0	0.0266667	0	0	0.857556	7.08376	1.61367	0.0444444	0	89.2111	1.81826	0	0	0	53.4139	0	151.595	0.407734	0	0.739981	0	4	5.67624	83.0324	1	1.5663	0	0.916237	-0.515059	1.11e-16	7.03319	0.0277778	0	0	0	0	0	3.38192	0	0
95169	3.33	0	0	1.013	2.2963	0	44.9557	0.695202	0.812393	9	0.0243056	0	0.642857	0	0	0.882836	0.0683761	0	172.065	2.40667	0	0	0	0	0	139.134	0.63211	0	0.962479	0	0	4.7451	86.1514	0	0.657786	0	1.18236	-0.353056	0.0544771	7.17437	0	0	0	0	0	0	1.13678	5.29612	1
71556	3.45	0	0	2.469	2.3765	1	26.2173	0.697318	0.603759	0	0	0	0	0	0	1.86704	0	0	0	1.81128	0	0	0	0	0	146.317	0.603759	0	0.353759	0	0	0	0	0	0.547346	0	0.559601	-0.935727	1.11e-16	0	0	0	0	0	0	0	4.11806	0	0
56235	3.55	0	0	2.864	2.5529	1	26.849	2.5	0.110918	0	0	0	0	0	0	2.5	0	0	0	0.721928	0	0	0	0	0	146.019	0.310918	0	0	0	0	0	0	0	2.5	0	0	-1	1.11e-16	0	0	0	0	0	0	0	12.8494	0	0
142961	3.61	0	0.75	2.72	2.6032	1	34.4873	1.62698	0.56762	0	0.016	0	0	1.25844	6.91937	1.77772	0.031746	0	98.3399	1.53049	0	0	0	85.4173	0	147.064	0.321878	0	0.629934	0	4	6.12046	99.6348	0	1.3815	0.0136054	1.48802	-0.199134	2.22e-16	7.30405	0.0138889	0	0	0	0	0	1.39311	0	0
573568	3.67	0	0.153846	2.885	0.9266	0.384615	38.9967	0.734518	0.787659	6	0.0408333	0	0.352941	5.26e-05	0	0.846211	0.111111	0	185.006	3.05748	2	0	0	0	0	157.511	0.748013	0	0.88487	2	0	2.3811	146.259	0	0.538972	0	0.508049	-0.323921	6.66e-16	9.50781	0.0590278	0	0	0	3	0	1.60504	4.58576	2.3811
111477	3.74	0	0.666667	2.743	2.5396	1	34.8385	1.39326	0.59334	0	0.0266667	1	0	0.69602	6.85152	1.34334	0.0444444	0	106.151	1.56837	0	0	0	58.968	0	144.21	0.35707	0	0.59334	0	2	2.94168	112.584	0	1.00604	0	1.0796	-0.127317	1.11e-16	7.01982	0.0277778	0	0	0	0	0	0.0197122	0	0
756809	3.83	0	0.333333	1.628	1.1041	0.833333	37.7344	1.09302	0.633983	0	0	0	0	0	0	1.36435	0.138889	0	132.355	2.4138	0	0	0	0	0	143.785	0.633983	0	0.633983	0	0	0	72.9102	0	0.533801	0	1.67157	-0.659617	2.06e-16	6.91805	0	0	0	0	0	0	2.20107	0	0
5673074	3.88	0	0.181818	1.477	2.28732	0.454545	48.5248	1.15949	0.682632	6	0.0493333	0	0.26087	0.381561	6.91805	1.39932	0.111111	0	166.865	2.60882	0	0	0	72.9102	1	145.148	0.576718	0	0.747557	0	0	2.3811	113.159	0	0.889393	0	1.29448	-0.279186	8.33e-17	7.25503	0.0451389	0	0	0	3	0	0.726927	4.58576	2.3811
496117	3.93	0	0	2.885	2.1753	0	41.158	0.95	0.677861	6	0.0243056	0	0.473684	0	0	0.95	0.0683761	0	125.809	2.37899	0	0	0	0	2	139.958	0.560036	0	0.727421	0	3	9.48041	71.2371	0	0.95	0	0.921186	0.0495863	0.0544771	6.91006	0	0	0	0	2	0	0.720801	8.05287	1
498668	3.97	2	0	2.997	1.89869	0	29.6932	1.07937	0.632884	0	0	0	0.411765	0	0	1.07937	0.040404	0	48.3912	2.04306	0	0	0	0	0	141.421	0.499835	0	0.712176	0	3	5.29612	31.0837	0	1.07937	0	1.03145	-0.0413637	1.11e-16	6.71846	0	2	0	0	0	0	0.184213	7.57858	0.5
105533	4.04	0	0.6	1.189	0.5027	0.8	37.1136	1.40048	0.658697	0	0.024	0	0	0.730539	8.73364	1.85074	0.0808081	0	182.123	2.21836	0	0	2	127.23	0	148.396	0.490402	0	0.658697	2	1	0.793701	129.559	0	0.831912	0.00816326	0.557508	-0.533806	3.05e-16	7.807	0.0277778	0	0	0	0	0	0.311364	3	0.5
760236	4.18	1	0.4	2.025	1.94479	0.8	29.4885	0.92074	0.907019	0	0	0	0	0	0	1.45504	0.133333	0	118.397	2.62581	0	1	1	0	0	144.651	0.732452	0	0.907019	0	1	0.5	62.4429	0	0.508505	0	0.896234	-0.232952	1.11e-16	7.48138	0	1	0	0	0	0	4.65394	2	0
2691410	4.3	0	0.2	0.932	-2.7592	0.4	42.4956	1.2943	0.524538	0	0.05	0	0.285714	0.0478162	11.6709	2.28236	0.0952381	0	136.037	2.52164	4	0	0	229.458	0	177.236	0.524538	0	0.524538	4	0	2.3811	196.627	0	0.465061	0.0185871	0	-0.688601	8.88e-16	9.62476	0.0408951	0	0	0	0	0	0.380936	0	0
616728	4.39	0	0.142857	1.612	2.51024	0.428571	45.9552	0.96401	0.69921	6	0.051358	0	0.272727	0.383454	9.47117	0.999376	0.111111	0	169.898	3.02717	2	0	0	82.0136	2	152.653	0.678824	0	0.760367	2	0	0.333333	126.165	0	0.571027	0	0.336398	-0.201049	1.33e-15	8.62978	0.0694444	0	0	0	4	0	7.41364	5.65685	3.30193
1965099	4.54	0	0.125	1.579	3.39089	0.25	65.3971	0.789907	0.517642	12	0.057037	0	0.52	1.07955	7.45641	0.8891	0.0634921	0	166.81	2.24386	0	0	0	158.666	0	143.471	0.483188	0	0.655459	0	0	8.6919	191.851	0	0.782673	0.0241633	0.596142	-0.541101	5.55e-17	7.5148	0.0104167	0	0	0.00987654	4	0	0.400562	12.362	1.53262
142825	4.65	0	0.666667	4.323	2.9767	1	26.3554	1.64286	0.447493	0	0.0266667	0	0	0.83664	6.85152	1.64286	0.0444444	0	90.7071	1.14923	0	0	0	58.968	0	145.942	0.254054	0	0.528848	0	5	5.67624	85.4173	0	1.64286	0	1.10529	-0.139136	1.11e-16	6.91937	0.0277778	0	0	0	0	0	1.78864	0	0
693652	4.7	0	0.8	3.858	3.3834	1	40.3105	1.60241	0.540268	0	0.0114286	0	0	0.719692	7.00584	1.72288	0.0246914	0	101.869	1.48023	0	0	0	112.276	0	146.554	0.293441	0	0.630494	0	6	9.65812	100.369	0	1.40123	0.00816326	1.46432	-0.188065	1.11e-16	7.21366	0.00925926	0	0	0.00823045	0	0	3.08459	0	0
112301	4.82	0	0.8	4.265	3.1194	1	36.4683	1.54621	0.481785	0	0.0114286	0	0	0.926315	7.1033	1.57831	0.0246914	0	100.92	1.52201	0	0	0	94.762	0	146.727	0.301723	0	0.60034	0	8	13.1851	99.4269	0	1.44686	0.00816326	0.858203	-0.419685	1.11e-16	7.07164	0.00925926	0	0	0.00823045	0	0	7.29756	0	0
87616	4.89	0	0	2.547	3.6468	0.333333	45.1044	0.564898	0.592981	6	0.0833333	0	0.5	0	0	0.895412	0.12963	0	230.491	2	0	0	0	0	0	138.183	0.557886	0	0.721057	0	0	2.3811	125.161	0	0.486382	0	1.2191	-0.272815	2.42e-16	9.0072	0	0	0	0	3	0	6.29759	4.58576	2.3811
935955	4.95	0	0	3.043	4.0058	0.454545	51.4261	0.377356	0.750549	6	0.0795062	0	0.461538	0	0	0.783216	0.138889	0	291.499	2.46967	0	0	0	0	0	141.269	0.667399	0	0.8337	0	0	0	242.502	0	0.586393	0	0.64512	-0.397693	1.05e-16	9.79241	0	0	0	0	5	0	5.35969	3.04182	6.08364
4117140	5.16	0	0.5	3.677	2.42219	0.7	41.1623	1.35011	0.668309	0	0.0114286	0	0	0.902223	7.18722	1.37375	0.0246914	0	118.379	1.99258	0	0	0	106.693	0	145.813	0.410167	0	0.77098	0	6	13.1851	111.392	0	1.28219	0.00816326	0.843087	-0.44618	5.55e-17	7.13602	0.00925926	0	0	0.00823045	0	0	1.40328	0	0
86748	5.29	0	0	2.027	2.8392	0	61.4268	0.735994	0.592284	13	0.0211111	0	0.590909	1.01341	6.9027	0.874507	0.0634921	0	185.762	2.0958	0	0	0	69.6928	2	141.594	0.469969	0	0.75537	0	0	9.7142	159.453	0	0.752894	0.00814815	0.897564	-0.385531	6.22e-16	7.19082	0.0169048	0	0	0	0	0	1.21352	13.1605	4.24264
111831	5.36	0	0.75	4.939	3.7418	1	36.6796	1.30902	0.510893	0	0.016	0	0	0.877239	7.0809	1.51503	0.031746	0	106.542	1.43134	0	0	0	101.217	0	144.947	0.304512	0	0.594067	0	6	9.33326	105.477	0	0.544605	0.0136054	0	-0.124379	2.22e-16	7.04343	0.0138889	0	0	0	0	0	0.602642	0	0
111319	5.47	0	0.666667	3.37	2.4965	1	30.9489	1.44385	0.64489	0	0.0266667	0	0	0.893537	6.98825	1.4157	0.0444444	0	98.722	1.72062	0	0	0	64.3335	0	144.105	0.391733	0	0.74512	0	4	5.67624	94.7786	0	1.18366	0	1.22363	-0.319397	1.11e-16	6.98871	0.0277778	0	0	0	0	0	0.3342	0	0
563122	5.73	0	0.666667	4.978	4.3465	0.888889	95.0817	1.09271	0.549214	0	0.016	2	0	1.08219	7.21249	1.28771	0.10628	0	228.387	2.23298	0	0	0	125.381	0	143.209	0.416791	0	0.549214	0	0	1.89465	192.778	0	0.464677	0.0171858	1.40107	-0.664054	8.33e-16	7.85722	0.0339506	0	0	0.00617284	0	0	17.0858	0	0
1871574	5.82	0	0.4	1.478	1.94639	0.8	29.5827	0.92074	0.674567	0	0	0	0	0	0	1.45504	0.133333	0	89.4412	2.4183	0	1	1	0	1	144.651	0.674567	0	0.591233	0	0	0.5	0	0	0.508505	0	0.666205	-0.233659	8.91e-17	0	0	0	0	0	0	0	4.09536	2	0
79947	6	0	0.0909091	5.682	6.241	0.454545	106.444	0.601526	0.654523	12	0.0642963	0	0.393939	1.2648	8.53461	0.771944	0.130719	0	218.407	3.30167	0	0	0	230.128	2	140.268	0.654523	0	0.702581	0	0	1.88988	196.247	0	0.491762	0.0184045	0.556642	-0.525916	3.24e-16	7.39573	0.0372024	0	0	0.0176754	8	0	16.1154	11.9187	8.66442
6284839	6.09	0	0.133333	2.981	3.1812	0.466667	51.5398	0.438399	0.769455	6	0.0414222	0	0.375	0.0673714	0	0.776438	0.10101	0	326.272	2.90564	2	0	0	0	0	154.435	0.72641	0	0.84375	2	0	0	218.821	0	0.580377	0	0.413719	0.136392	2.21e-17	10.3939	0.0694444	0	0	0	5	0	8.62068	3.04182	6.08364
955839	6.64	0	0.105263	3.305	4.63649	0.105263	80.3831	0.810319	0.485175	17	0.0211696	0	0.586207	0.928287	7.17157	0.882488	0.0622222	0	198.074	1.75318	0	0	0	190.792	2	138.699	0.360887	0	0.676964	0	0	17.1031	192.713	0	0.742234	0.0102041	0.962108	-0.344792	5e-16	7.47711	0.0286806	0	0	0.00403124	0	0	5.30611	15.9305	2.94168
3383968	7.14	0	0.357143	4.677	4.90508	0.5	127.802	0.956452	0.582406	12	0.0413072	1	0.276596	0.92644	7.32444	1.24796	0.0797721	0.00467565	209.239	3.06481	0	0	0	148.735	0	141.906	0.551762	0	0.643693	0	0	8.6919	219.787	0	0.527937	0.0279435	1.22364	-0.737563	8.88e-16	7.77238	0.0122549	0	0	0.0129955	4	0	13.1058	12.362	1.53262
1484135	7.78	1	0.0588235	2.784	4.11748	0.0588235	70.4137	0.819661	0.656333	13	0.0228307	0	0.5	1.10871	6.88364	1.06952	0.0740741	0	217.082	2.15991	0	1	2	65.6987	2	141.087	0.459513	0	0.787254	0	0	11.6543	180.298	0	0.758623	0.0208889	0.863705	-0.237391	2.5e-16	7.22549	0.0229915	0	0	0	0	0	2.96425	14.7934	4.24264
121824	4.31	0	0.2	0.699	-2.0694	0.4	31.8717	1.27832	0.574103	0	0.0585185	0	0.285714	8.91e-05	0	2.25419	0.0952381	0	121.827	2.52164	3	0	0	0	0	177.236	0.574103	0	0.574103	3	0	1.5	212.153	0	0.45932	0	0.342398	-0.688601	1.28e-16	10.4136	0.0578704	0	1	0	0	0	0.214276	0	0
68122	0.84	1	0.25	-0.384	-0.2956	0.75	20.1873	1.6321	0.592981	0	0	0	0	0	0	2.67215	0.111111	0	45.6351	2.12581	0	0	0	0	0	156.016	0.592981	0	0.509648	1	0	0	0	0	0.979478	0	0.65614	-0.406962	0.0608102	0	0	0	0	0	0	0	0.249101	0	0
115195	1.41	0	0	0.405	0.47009	0.6	24.0968	1.20433	0.671505	0	0	0	0	0	0	1.24473	0.0952381	0	63.236	2.55666	0	0	0	0	0	147.505	0.671505	0	0.671505	0	0	0	31.0837	0	1.13343	0	0.598358	-0.668405	0.108212	6.71846	0	0	0	0	0	0	0.807662	0	0
95807	1.93	0	0	0.013	2.04202	0.333333	42.3374	0.895375	0.758275	6	0.103333	0	0.315789	0.383103	6.71846	0.944402	0.111111	0	111.6	2.86558	0	0	0	31.0837	1	153.904	0.674582	0	0.841968	0	0	1.65096	69.5807	2	1.0657	0	0.473942	-0.623589	0.0232586	7.14008	0	0	0	0	3	0	0.295501	5.8538	1.65096
5813649	2.26	0	0.2	0.907	0.9912	1	28.0611	1.59807	0.538051	0	0	0	0	0	0	1.641	0.0952381	0	47.8314	1.88958	0	0	0	0	0	152.804	0.444824	0	0.538051	0	0	0	31.0837	1	1.57644	0	0.75647	-0.576798	0.108212	6.71846	0	0	0	0	0	0	0.66896	0	0
78591	2.78	1	0	1.982	2.24799	0.3	42.6464	1.22776	0.724964	0	0.0493827	0	0.25	0	0	1.27777	0.0740741	0	91.7272	2.41389	0	0	0	0	1	143.259	0.52648	0	0.761315	1	2	1.5	104.738	0	1.06098	0	0.454393	-0.36228	0.0368555	7.83677	0	0	0	0	0	0	3.79821	4.16017	0.5
78795	2.93	1	0.25	2.348	1.60088	0.5	24.5764	1.3	0.734857	0	0	0	0	0	0	1.3	0.111111	0	68.7275	2.28778	0	2	2	0	1	144.346	0.618246	0	0.818007	0	0	0	31.0837	0	1.3	0	0.59043	-0.235085	0.0608102	6.71846	0	0	0	0	0	0	3.46481	1	0
75978	3.06	0	0.166667	0.932	1.6215	0.833333	29.8972	1.4923	0.528698	0	0	0	0	0	0	1.58332	0.148148	0	67.4563	1.73348	0	0	0	0	0	145.821	0.408077	0	0.528698	1	0	0	31.0837	0	1.21233	0	0.484789	-0.453514	0.0547509	6.71846	0	0	0	0	0	0	1.69599	0	0
578541	3.21	0	0.111111	1.18	2.93949	0.333333	43.636	1.01317	0.783026	6	0.0524444	0	0.3	0.360376	6.71846	1.01633	0.10101	0	133.839	2.84145	0	0	0	31.0837	1	147.57	0.657449	0	0.875578	0	1	5.08568	83.0492	1	1.08411	0	0.606101	-0.541898	0.0850147	7.08099	0.0625	0	0	0	2	0	0.101124	5.67624	1
77736	3.41	4	0	3.722	2.23698	0	42.3493	0.9625	0.780753	0	0.0194444	0	0.454545	0	0	0.9625	0.0740741	0	104.784	2.42512	0	0	0	0	0	139.958	0.543818	0	0.890377	0	2	6.13714	66.935	0	0.9625	0	1.1272	-0.029392	0.048897	6.88954	0	4	0	0	0	0	0.0116208	12.8948	4.24264
4655349	3.53	0	0.375	1.597	1.44029	0.75	35.9162	1.3765	0.736936	0	0.0533333	0	0	1.74181	6.71846	1.60866	0.111111	0	114.643	2.61997	0	1	2	31.0837	1	146.574	0.596489	0	0.736936	1	1	0	159.901	0	0.998073	0	0	-0.756668	0.0465054	7.80514	0	1	0	0	0	0	1.24323	0	1.65096
768945	3.78	0	0	2.312	1.9139	0.0769231	44.1259	1.12841	0.524248	0	0.0555556	0	0.357143	0	0	1.13212	0.031746	0	80.4278	1.91921	0	0	0	0	0	145.91	0.399224	0	0.613397	0	6	6.52913	69.4389	1	1.15733	0	0.558865	-0.501034	0.014298	7.0632	0	3	0	0	0	0	2.49229	10.3923	1.5
95658	3.9	0	0	1.73	1.44824	0.333333	41.1253	1.00921	0.699362	6	0.103333	0	0.315789	0.19406	6.71846	1.02288	0.111111	0	119.935	2.72058	0	0	0	31.0837	2	143.736	0.640449	0	0.783055	0	0	1.65096	66.7598	0	0.992723	0	0.483442	-0.5251	0.0232586	7.17804	0	0	0	0	3	0	3.00364	5.8538	1.65096
21725462	4.12	0	0.25	0.001	2.67616	0.5	59.0925	1.04609	0.726512	6	0.042807	0	0.206897	1.6861	8.28313	1.91908	0.0606061	0	153.629	3.01096	0	0	0	142.221	0	156.313	0.619797	2	0.813569	0	0	0.142857	197.848	0	0.625052	0.0229116	0.346325	-0.938608	0.00102925	8.26169	0.0416667	0	1	0.00617284	3	0	0.027291	1.63977	1.5
2416946	4.22	0	0	1.7	1.90156	0.4	45.4073	1.06302	0.619966	6	0.0874074	0	0.272727	0.537761	6.71846	1.07704	0.142857	0	131.662	2.54856	0	0	0	31.0837	3	143.819	0.5715	0	0.688818	0	0	1	74.8734	0	1.03737	0	0.530573	-0.543681	7.49e-16	7.11467	0	0	0	0	4	0	4.75022	4.29828	3.96541
121755	4.37	0	0.611111	2.007	1.7924	0.833333	77.2727	1.17741	0.734133	0	0.0416	1	0	1.1193	8.12822	1.48257	0.10628	0	203.536	2.75554	0	0	2	138.487	0	145.665	0.525073	0	0.754191	2	2	0.685007	186.403	0	0.522183	0.0187075	0.710311	-0.57908	0.131668	8.3904	0.0299145	1	0	0.00823045	0	0	3.85769	3.79021	1.65096
764136	4.47	2	0.142857	3.128	2.77118	0.714286	40.2054	1.375	0.418805	0	0.08	0	0	2.0625	6.71846	1.375	0.0833333	0	89.2473	1.86763	0	0	0	31.0837	2	144.346	0.418805	0	0.418805	0	0	1	122.997	0	1.375	0	0.554167	0.110041	7.77e-16	7.00697	0	0	0	0	0	0	9.68703	2.82843	0.333333
99865	4.64	2	0.1	3.546	3.16128	0.4	47.6977	1.25	0.703263	0	0.0637037	0	0.230769	0.677083	7.0378	1.25	0.102564	0	111.278	2.26571	0	0	0	98.006	2	142.996	0.482021	0	0.719628	0	2	3.30193	82.2306	0	1.25	0	0.726909	0.0231807	0.0154558	6.90911	0.0787037	1	0	0	0	0	3.54983	7.06555	1.31037
2032599	5.03	0	0.266667	1.281	2.08062	0.533333	62.6741	1.18706	0.739295	6	0.0407843	0	0.193548	0.842258	8.03528	1.69953	0.0888889	0	158.261	3.10632	0	0	0	129.885	1	150.334	0.627008	1	0.824069	1	0	1.65096	140.498	0	0.896081	0.0247619	0.415282	-0.734109	0.113382	7.51654	0.042298	0	0	0.00987654	3	0	1.42158	6.44742	2.40685
6846500	5.27	0	0.473684	3.529	3.4356	0.894737	78.7592	1.44674	0.532096	0	0.0492308	0	0	0.705488	7.27362	1.65575	0.139918	0	118.39	2.05972	0	0	2	121.778	0	146.165	0.364949	0	0.666756	2	1	0	165.181	0	1.08233	0.0130612	0.49252	-0.663277	0.113193	7.47365	0.037037	4	0	0.0123457	0	0	7.47858	2.00415	4.3883
18172673	5.43	0	0	4.222	2.92489	0.181818	43.3169	1.2037	0.758535	0	0.0888889	0	0.269231	0	0	1.2037	0.138889	0	97.8676	2.41956	0	1	1	0	1	142.396	0.514751	0	0.791265	0	3	1.65096	62.625	0	1.2037	0	0.535147	-0.15551	0.0516743	6.86897	0	2	0	0	0	0	1.87553	5.8538	1.65096
137268	5.95	0	0.454545	1.548	2.0608	0.818182	69.2408	0.944702	0.463649	0	0.04	2	0	1.2789	7.9101	1.32547	0.142857	0	149.734	2.12581	0	0	0	156.144	0	147.538	0.463649	0	0.463649	0	0	0	246.533	0	0.518722	0.0204082	1.17813	-0.360542	8.88e-16	7.99857	0.0416667	0	0	0	0	0	9.95907	0	0.333333
584792	6.58	2	0.26087	3.714	3.78057	0.478261	88.9958	1.15234	0.773223	0	0.0485484	0	0.208333	1.35841	7.36189	1.254	0.145833	0.00413223	144.598	3.067	0	1	2	116.552	3	142.932	0.549153	0	0.79842	2	3	1.44225	149.95	0	0.944839	0.0201617	0.520074	-0.46352	0.0125019	7.69176	0.0321429	3	0	0.0123911	0	0	12.7563	9.47784	9.35555
40596698	7.49	3	0.52381	5.905	4.91438	0.857143	92.6308	1.4056	0.718267	0	0.0208696	0	0	0.943827	7.3295	1.55456	0.0823045	0.00550964	120.887	2.65201	0	0	1	133.392	1	145.484	0.456663	0	0.823856	1	5	7.21301	115.043	0	1.15135	0.012987	0.521648	-0.501409	0.00832906	7.31777	0.0380117	2	0	0.00823045	0	0	4.82989	7.74285	1.57367
[truncated: 8 more columns]

## Sheet: TrainingSet 56Descriptors
Cas No.	Acute Toxicity：-logLC50（mol/l）	khs.dsCH	RotBFrac	XLogP	CrippenLogP	RotBtFrac	AMR	GATS1v	SIC2	naAromAtom	JGI4	khs.ssS	FMF	GATS6i	AATS7e	GATS1i	JGI2	JGI10	AATS4v	IC1	khs.ddsN	khs.dCH2	C1SP2	AATS7v	C3SP2	AATS1i	SIC1	khs.ssNH	SIC3	khs.dO	C2SP3	MDEC-22	AATS5v	khs.sNH2	GATS1m	JGI6	GATS2s	MATS1c	VE1_D	AATS5e	JGI5	khs.sssCH	n6HeteroRing	JGI8	khs.aasC	khs.dssS	ALogp2	MDEC-23	MDEC-33
107211	0.07	0	0.333333	-1.208	-1.029	1	14.5536	1.47929	0.578558	0	0	0	0	0	0	1.87757	0.111111	0	48.0604	1.92193	0	0	0	0	0	157.371	0.578558	0	0.578558	0	0	1	31.0837	0	1.14585	0	1.18862	-0.522495	2.22e-16	6.71846	0	0	0	0	0	0	0.805327	0	0
123911	0.93	0	0	-0.38	0.0332	0	22.087	1.42967	0.362137	0	0	0	0.428571	0	0	1.95431	0	0	72.9102	1.37878	0	0	0	0	0	149.424	0.362137	0	0.362137	0	0	3.30193	31.0837	0	0.883101	0	1.7	-0.190952	7.22e-16	6.71846	0	0	1	0	0	0	0.0685392	0	0
51796	1.23	0	0.4	-0.214	0.1016	0.8	18.7833	1.374	0.818007	0	0	0	0	0	0	1.95148	0.0888889	0	139.58	2.65354	0	0	0	0	0	159.281	0.717089	0	0.818007	1	0	0	71.729	1	0.925659	0	0.326757	-1.00803	0.0761289	7.86326	0	0	0	0	0	0	0.0721997	0.5	0
15892236	1.59	0	0.25	0.742	0.7772	1	20.6715	1.61168	0.701215	0	0	0	0	0	0	1.70479	0.111111	0	61.8487	1.8716	0	0	0	0	0	149.787	0.479052	0	0.803599	0	2	0	31.0837	0	1.39465	0	0.801496	-0.54737	0.0608102	6.71846	0	1	0	0	0	0	0.484555	1	0
693936	1.78	0	0	0.402	1.16252	0.166667	23.5217	1.09909	0.875048	5	0	0	0.454545	0	0	1.66667	0.0634921	0	75.3929	2.84535	0	0	1	0	0	150.291	0.822491	0	0.875048	0	0	0.5	31.0837	0	0.721053	0	0.924982	-0.431503	0.0531282	6.71846	0	0	0	0	1	0	0.00388129	1.41421	0
685916	1.89	0	0.428571	0.698	0.8747	0.857143	32.8469	1.56955	0.650205	0	0	0	0	0	0	2.12978	0.138889	0	136.194	1.91109	0	0	1	0	0	150.765	0.435099	0	0.650205	1	0	0.5	68.8198	0	1.14528	0	0.490776	-0.586074	0.0450008	7.21224	0	0	0	0	0	0	0.00648025	1	0
104676	2.09	0	0.461538	3.882	3.0525	0.538462	40.5187	1.37428	0.591158	0	0.0227778	0	0.151515	0.918543	7.30419	1.52165	0.0444444	0	112.902	1.82954	0	0	1	110.719	0	145.164	0.362689	0	0.755174	1	9	9.9794	111.032	0	1.09815	0.0137674	0.455046	-0.587283	0.188657	7.21774	0.0169444	1	0	0.0111883	0	0	4.2907	5.23453	0.5
109853	2.16	0	0.5	-0.756	-0.4085	1	20.9623	1.65487	0.798231	0	0	0	0	0	0	2.11049	0.0740741	0	76.0866	2.26082	0	0	0	0	0	158.791	0.593803	0	0.798231	0	0	1	61.534	1	1.24327	0	1.42133	-0.367586	1.11e-16	7.2166	0	0	0	0	0	0	0.606062	0	0
75310	2.28	0	0	0.317	0.3535	1	19.4174	1.65942	0.59444	0	0	0	0	0	0	1.75758	0	0	31.0837	1.88109	0	0	0	0	0	157.032	0.508344	0	0.517516	0	1	0	0	1	1.61013	0	0.636836	-0.627772	0	0	0	1	0	0	0	0	0.486785	0	0
100710	2.41	0	0.125	0.393	2.04919	0.25	36.8863	1.08815	0.83436	6	0.0503704	0	0.352941	0.579973	6.71846	1.32244	0.0493827	0	134.764	2.65426	0	0	1	31.0837	0	145.07	0.649365	0	0.902789	0	1	5.08568	96.7145	0	0.956918	0	0.936499	-0.261435	0.0775576	6.97911	0.0625	0	1	0	1	0	0.0711289	3.04182	0
598743	2.49	0	0.2	0.972	0.9896	1	27.7865	1.59807	0.596964	0	0	0	0	0	0	1.641	0.148148	0	65.9533	1.88958	0	0	0	0	0	152.804	0.444824	0	0.699362	0	1	0	31.0837	1	1.57644	0	0.714416	-0.603538	4.44e-16	6.71846	0	2	0	0	0	0	0.0310112	0	1
80626	2.59	0	0.333333	0.714	0.66169	0.666667	26.4176	1.33674	0.803599	0	0	0	0	0	0	1.65198	0.15873	0	101.83	2.73957	0	1	2	0	1	147.528	0.701215	0	0.803599	1	0	0	114.737	0	0.886528	0	0.594951	-0.70501	0.0486084	7.11763	0	0	0	0	0	0	1.35746	0	1
75990	2.69	0	0.166667	0.772	1.2648	0.833333	27.623	0.750867	0.822491	0	0	0	0	0	0	1.5118	0.148148	0	95.2378	2.84535	0	0	1	0	0	149.687	0.822491	0	0.822491	1	1	0	31.0837	0	0.535642	0	0.39771	-0.645898	0.0547509	6.71846	0	0	0	0	0	0	0.808021	0	0
110190	2.75	0	0.428571	1.319	1.2055	0.857143	30.6961	1.50595	0.719284	0	0.08	0	0	1.28943	6.71846	1.78739	0.0833333	0	91.553	2.07095	0	0	1	31.0837	0	147.615	0.479173	0	0.696146	1	0	0	136.589	0	1.04922	0	0.458394	-0.648571	7.77e-16	7.43367	0	1	0	0	0	0	0.253311	1.41421	0.333333
75354	2.86	0	0	1.933	1.86139	0.666667	20.4606	0.668026	0.742098	0	0	0	0	0	0	1.43202	0	0	0	1.9183	0	1	2	0	0	145.016	0.742098	0	0.408765	0	0	0	0	0	0.541647	0	0.945427	-1.02157	0	0	0	0	0	0	0	0	2.84934	0	0
108656	2.91	0	0.5	0.511	0.5844	0.875	33.0407	1.52141	0.823668	0	0.0228571	0	0	0.291919	7.90214	1.98641	0.0740741	0	129.836	2.34377	0	0	1	103.829	0	149.229	0.533606	0	0.823668	1	1	0	109.876	0	0.941262	0	0.641095	-0.474678	0.046215	7.88253	0.037037	1	0	0	0	0	0.0145203	1.1547	0.5
999973	2.99	0	0.25	3.056	3.16998	1	37.977	1.35282	0.312301	0	0	0	0	0	0	1.64727	0.0512821	0	100.431	1.50134	0	0	0	0	0	138.576	0.312301	1	0.312301	0	0	0	114.737	0	1.24247	0	0.379049	-0.481819	1.11e-16	7.11763	0	0	0	0	0	0	15.1165	0	0
108010	3.04	0	0.4	-0.646	-0.4597	1	26.2804	1.7072	0.690448	0	0	0	0	0	0	2.48397	0.0888889	0	70.9644	2.01574	0	0	0	0	0	155.47	0.493152	0	0.690448	0	0	1	54.728	0	1.27681	0	0.966012	-0.324149	0.0761289	7.58419	0	0	0	0	0	0	0.0480925	0	0
58082	3.11	0	0	-0.45	-0.15881	0.2	42.1536	1.14286	0.722559	5	0.0732456	0	0.375	0.870498	7.06255	2.22596	0.115942	0	167.604	3.03145	0	0	2	37.45	0	155.67	0.661173	0	0.815841	2	0	0	149.027	0	0.665058	0	0.532989	-0.735183	0.00979397	8.02812	0.0347569	0	1	0	2	0	3.80289	1.51967	3.53278
104905	3.17	0	0.111111	0.785	2.13192	0.333333	40.9932	1.13651	0.843707	6	0.0855556	0	0.3	1.20125	6.91805	1.34429	0.0808081	0	125.294	2.78418	0	0	1	72.9102	1	144.961	0.644199	0	0.866844	0	1	2.94168	89.8903	0	1.01456	0	0.762767	-0.255487	0.0568238	7.06046	0.0590278	0	1	0	2	0	0.0536386	5.18736	0.333333
589162	3.22	0	0.111111	1.391	1.8312	0.333333	43.636	1.01317	0.759889	6	0.0855556	0	0.3	0.937075	7.3273	1.01633	0.0808081	0	121.067	2.84145	0	0	0	68.3007	1	147.57	0.657449	0	0.85244	0	1	4.88359	87.2902	1	1.08411	0	0.540913	-0.533279	0.0568238	6.97394	0.0590278	0	0	0	2	0	0.101124	6.59754	0.333333
75365	3.27	0	0	0.581	0.7717	0.666667	16.5022	0.963551	0.758039	0	0	0	0	0	0	1.69488	0	0	0	2.12809	0	0	1	0	0	147.587	0.758039	0	0.472325	1	0	0	0	0	0.502409	0	0.689526	-0.667455	0	0	0	0	0	0	0	0	0.138384	0	0
385002	3.36	0	0.0909091	0.581	1.663	0.363636	37.2106	0.752847	0.81648	6	0.0344444	0	0.4	0.122478	6.71846	0.772605	0.103704	0	187.485	3.00624	0	0	1	31.0837	1	148.745	0.769471	0	0.897617	1	0	2.3811	121.112	0	0.575941	0	0.649141	-0.531661	0.0627605	9.29056	0.0625	0	0	0	3	0	0.620314	5.36866	4.24264
103059	3.39	0	0.25	2.619	2.3901	0.5	55.3855	1.14136	0.70377	6	0.0588889	0	0.214286	1.33034	7.16969	1.15515	0.0555556	0	103.921	2.72026	0	0	0	99.7782	1	143.932	0.565855	0	0.775161	0	2	9.56307	125.124	0	1.10711	0.0205248	0.685372	-0.462177	0.0317134	7.10219	0.0347222	0	0	0	1	0	2.75427	4.44554	0
108883	3.43	0	0	2.474	1.71462	0.142857	35.2378	1	0.605493	6	0.111111	0	0.4	0	0	1	0.0555556	0	92.7471	2.04195	0	0	0	0	1	140.836	0.522652	0	0.735343	0	0	6.08364	58.968	0	1	0	0.875	0.0172559	0.0114498	6.85152	0	0	0	0	1	0	3.42176	3.04182	0
19549985	3.46	0	0.333333	2.409	1.88639	0.777778	41.5357	1.33376	0.684732	0	0.08	0	0	1.29684	6.81523	1.35956	0.111111	0	97.4442	2.39052	0	0	0	51.3632	0	145.989	0.508574	0	0.785088	0	2	1.65096	108.863	0	1.26279	0	0.558363	-0.611992	0.09589	7.11604	0.015873	1	0	0	0	0	2.38177	1.5	0
700389	3.51	0	0.0909091	2.202	1.18742	0.363636	40.061	0.883331	0.873302	6	0.0493333	0	0.333333	0.498945	9.47117	0.921285	0.103704	0	142.393	3.37744	1	0	0	82.0136	1	150.241	0.809953	0	0.936651	1	0	1.65096	107.639	0	0.6816	0	0.41611	-0.425238	0.0198784	8.37959	0.0787037	0	0	0	3	0	2.25	5.8538	1.65096
106401	3.56	0	0	1.077	2.0313	0.25	42.0398	0.638762	0.73735	6	0.151111	0	0.428571	0.983423	0	0.764049	0.0888889	0	122.044	2.52164	0	0	0	0	0	147.516	0.662308	0	0.812393	0	0	3.30193	92.1864	1	0.472711	0	0.589324	-0.609052	1.11e-16	7.20306	0	0	0	0	2	0	0.434808	5.65685	0.333333
615656	3.6	0	0	1.293	1.95022	0.333333	43.5038	0.793283	0.805578	6	0.103333	0	0.352941	0.890444	6.71846	0.930625	0.111111	0	128.25	3.13072	0	0	0	31.0837	1	147.721	0.765932	0	0.902789	0	0	1.65096	91.3338	1	0.589468	0	0.522293	-0.591161	0.0232586	7.45197	0	0	0	0	3	0	1.04408	5.8538	1.65096
104767	3.66	0	0.625	2.855	2.1951	1	35.0636	1.55744	0.645513	0	0.0266667	0	0	0.934778	7.08687	1.59876	0.0833333	0	101.675	1.81093	0	0	0	55.6957	0	147.276	0.380856	0	0.738984	0	4	4.61054	85.9671	0	1.43633	0	0	-0.449704	0.113694	7.17062	0.0277778	1	0	0	0	0	1.58911	3.49414	0
350469	3.7	0	0.1	1.149	1.5929	0.3	34.3013	0.83777	0.774872	6	0.0637037	0	0.428571	2.22875	0	0.794436	0.102564	0	148.861	2.6645	1	0	0	0	0	152.068	0.699829	0	0.849915	1	0	3.30193	133.692	0	0.489812	0	0.515994	-0.397817	0.0154558	9.35171	0.0787037	0	0	0	2	0	2.3302	5.65685	0.333333
614802	3.75	0	0.181818	0.743	1.3506	0.363636	44.7549	0.921381	0.829302	6	0.0646914	0	0.3	0.86102	7.02913	1.17869	0.0793651	0	156.687	3.28418	0	0	1	58.6224	0	148.812	0.759889	1	0.921853	1	0	3.96541	150.338	0	0.834809	0.04	0.552793	-0.63283	0.121017	7.82209	0.0168651	0	0	0	2	0	0.053546	5.02304	1.65096
119324	3.77	0	0.0909091	0.722	1.68062	0.363636	42.0053	0.880576	0.832615	6	0.0653333	0	0.315789	0.382369	6.71846	0.941247	0.103704	0	142.345	3.28663	1	0	0	31.0837	1	153.934	0.773702	0	0.916307	1	0	1.65096	105.194	1	0.72699	0	0.347022	-0.496644	0.0360415	8.29468	0.025	0	0	0	3	0	0.750649	5.8538	1.65096
95476	3.81	0	0	2.866	1.74264	0.25	39.5198	1.0625	0.580198	6	0.111111	0	0.333333	0	0	1.0625	0.111111	0	113.302	2.19716	0	0	0	0	2	141.421	0.526906	0	0.63349	0	0	3.96541	53.3912	0	1.0625	0	0.742405	0.0269227	5.55e-17	6.82491	0	0	0	0	2	0	5.27253	4.29828	1
84662	3.84	0	0.375	1.792	2.04	0.5	61.08	1.10306	0.677258	6	0.0319192	0	0.2	1.36703	7.57682	1.34432	0.1	0	208.198	2.86625	0	0	2	119.042	2	144.391	0.584127	0	0.704431	2	0	4.75758	187.376	0	0.770617	0.0202721	0.548823	-0.60246	1.5e-15	8.55647	0.0262346	0	0	0.0123457	2	0	2.35745	9.1672	3.96541
120218	3.87	1	0.307692	1.81	2.31369	0.461538	58.2363	1.16029	0.706478	6	0.0324786	0	0.214286	0.69698	7.18507	1.47587	0.0972222	0	161.947	2.77775	0	0	1	114.369	1	145.797	0.577813	0	0.765911	1	0	7.58573	117.256	0	0.953561	0.0323265	0	-0.203689	0.0355807	7.15	0.0442708	0	0	0	2	0	1.65688	7.48614	0.333333
99525	3.92	0	0.0909091	0.722	2.22702	0.363636	42.0053	0.880576	0.807835	6	0.0816667	0	0.315789	0.0818611	9.47117	0.941247	0.118519	0	136.74	3.28663	1	0	0	82.0136	1	153.934	0.773702	0	0.891527	1	0	1.65096	100.092	1	0.72699	0	0.353488	-0.521891	0.0570985	7.69601	0.0472222	0	0	0	3	0	0.750649	5.8538	1.65096
111308	3.94	2	0.666667	0.476	0.5545	0.666667	24.5978	1.31256	0.69285	0	0.0266667	0	0	7.36e-05	0	1.49997	0.0444444	0	109.244	2.33957	0	0	2	0	0	145.632	0.598832	0	0.69285	2	3	5.67624	107.277	0	0.872654	0	0.69275	-0.216715	1.11e-16	8.25513	0.0277778	0	0	0	0	0	0.36385	0	0
606202	3.99	0	0.153846	1.431	1.86562	0.384615	41.6732	0.903445	0.758275	6	0.0408333	0	0.315789	4.33e-05	0	0.938111	0.111111	0	181.464	3.0761	2	0	0	0	1	153.964	0.724142	0	0.841968	2	0	2.3811	118.343	0	0.517848	0	0.3722	-0.210085	6.66e-16	8.99158	0.0590278	0	0	0	3	0	5.182	4.58576	2.3811
141286	4.05	0	0.692308	1.494	1.673	0.846154	47.486	1.42236	0.665564	0	0.02	0	0	0.918521	7.52295	1.74741	0.0793651	0.00826446	150.269	2.21692	0	0	2	114.056	0	147.22	0.443383	0	0.665564	2	4	5.00829	129.367	0	0.942634	0.0204082	0.511746	-0.637628	1.11e-16	7.8534	0.0123457	0	0	0.0123457	0	0	0.000282	4.55119	0.2
315184	4.12	0	0.25	1.462	2.10864	0.5625	66.9561	1.2097	0.687588	6	0.0365657	0	0.176471	0.680425	8.18179	1.68534	0.0808081	0	165.66	2.98869	0	0	0	132.886	2	149.806	0.587462	1	0.758493	1	0	0.5	148.655	0	0.927633	0.0239703	0.396677	-0.736676	0.159171	7.58433	0.0480324	0	0	0.00987654	4	0	2.68534	5.60978	4.38094
6393426	4.18	0	0.142857	2.866	0.83122	0.428571	45.223	0.827308	0.766803	6	0.0612866	0	0.285714	0.16831	6.71846	0.954045	0.1	0	167.83	3.36804	2	0	0	31.0837	1	158.625	0.766803	0	0.840036	2	0	0.5	150.277	1	0.593956	0	0.381516	-0.381147	5.55e-16	8.9523	0.0363248	0	0	0	4	0	1.16575	5.11154	3.53278
88697	4.21	0	0.1	2.095	2.88619	0.4	45.609	1.06302	0.719596	6	0.0377778	0	0.272727	0.563369	6.71846	1.07704	0.102564	0	133.558	2.748	0	0	0	31.0837	1	143.819	0.616222	0	0.801139	0	0	3.96541	100.086	0	1.03737	0	0.533458	-0.534655	0.0515001	7.41598	0.0625	1	0	0	2	0	1.48255	5.55316	2.3811
4253898	4.26	0	0.428571	2.876	3.1846	1	45.9776	1.20502	0.418805	0	0.08	2	0	1.104	6.71846	1.12738	0.0833333	0	114.373	1.49111	0	0	0	31.0837	0	142.454	0.334373	0	0.418805	0	2	0	169.568	0	0.654594	0	1.01743	-0.275608	4.44e-16	7.17917	0	2	0	0	0	0	1.65277	0	0.333333
141275	4.32	3	0.4	2.701	2.73038	0.7	50.2393	1.30219	0.678427	0	0.02	0	0	0.706565	7.33749	1.34999	0.0808081	0	112.961	2.47283	0	0	1	141.243	2	144.017	0.520061	0	0.731042	1	2	4.5088	105.227	0	1.14009	0.0136054	0	-0.170362	0.0160007	7.24162	0.037037	0	0	0	0	0	6.19661	4.64039	0.25
110167	4.37	2	0.285714	-0.416	-0.36201	0.571429	24.607	0.82532	0.721057	0	0.08	0	0	0.000144	6.71846	1.12812	0.0833333	0	152.551	2.58496	0	0	2	31.0837	0	151.852	0.721057	0	0.721057	2	0	1	144.65	0	0.782978	0	0.484143	-0.823023	6.11e-16	10.1349	0	0	0	0	0	0	0.050715	2.82843	0.333333
27458942	4.4	0	0.666667	3.635	2.5852	1	37.6428	1.55122	0.609502	0	0.0266667	0	0	0.911122	7.13009	1.58736	0.0493827	0	91.2257	1.76288	0	0	0	90.8148	0	146.973	0.359267	0	0.721347	0	5	7.47342	97.4627	0	1.44207	0.0204082	0.833121	-0.43435	0.062731	7.08497	0.0222222	1	0	0	0	0	0.596293	2.00415	0
872311	4.42	0	0	2.212	2.5106	0.166667	34.4483	0.559892	0.929897	5	0	0	0.555556	0	0	0.647631	0.0634921	0	70.0114	2.41938	0	0	2	0	0	134.01	0.76323	0	0.929897	0	0	1.88988	0	0	0.509467	0	1.05019	-0.218575	0.0531282	0	0	0	0	0	1	0	0.877782	2.3811	0
1638228	4.47	0	0.272727	2.94	2.7348	0.454545	47.9285	1.10608	0.769546	6	0.0488889	0	0.24	1.16107	7.23823	1.12009	0.0683761	0	123.765	2.78268	0	0	0	93.5326	1	143.883	0.599218	0	0.872908	0	3	8.56995	120.121	0	1.07502	0.0253061	0	-0.503621	0.15276	7.06634	0.0243056	0	0	0	2	0	0.0332698	7.17834	0.333333
142927	4.52	0	0.666667	2.729	2.1298	0.888889	33.9734	1.50354	0.693075	0	0.0266667	0	0	0.878173	7.5154	1.7166	0.0493827	0	114.205	1.93121	0	0	1	101.333	0	146.83	0.410857	0	0.791265	1	4	5.67624	103.589	0	1.12465	0.0204082	0.451216	-0.609672	0.062731	7.30723	0.0222222	0	0	0	0	0	1.3696	1.34123	0
2495376	4.58	0	0.307692	1.806	1.89259	0.384615	55.1688	1.03637	0.766406	6	0.0345679	0	0.24	0.649781	7.50714	1.16994	0.0833333	0	130.485	2.84903	0	1	2	181.395	2	142.618	0.613504	0	0.849179	1	0	7.73232	174.391	0	0.828851	0.0182313	0.575393	-0.610367	0.0369939	7.55628	0.0347222	0	0	0.0204082	1	0	5.20844	5.66531	1.31037
94677	4.63	1	0.1	0.803	1.2003	0.3	41.17	0.797965	0.856088	6	0.0488889	0	0.352941	0.501128	7.34884	0.829816	0.0925926	0	145.302	2.81631	0	0	1	58.0003	1	149.322	0.689011	0	0.971218	0	0	5.08568	116.399	0	0.820282	0.04	0.572391	-0.380669	0.163926	8.0934	0.0225694	0	0	0	2	0	0.244234	5.67624	1
111251	4.68	0	0.666667	3.801	2.9616	1	30.8564	1.26172	0.597924	0	0.0266667	0	0	0.764387	7.26019	1.51974	0.0444444	0	103.879	1.51664	0	0	0	70.0114	0	145.136	0.350918	0	0.634311	0	4	5.67624	101.217	0	0.523924	0	1.17334	-0.148405	1.11e-16	7.0809	0.0277778	0	0	0	0	0	0.0401201	0	0
87172	4.73	0	0.176471	1.594	3.24459	0.235294	69.0662	0.802949	0.671769	12	0.0360784	0	0.518519	0.825263	7.56112	0.961833	0.0707071	0	172.473	2.6416	0	0	1	188.181	1	144.402	0.555556	1	0.878413	1	0	10.1548	178.176	0	0.776496	0.00948195	0.591734	-0.552643	0.0828581	7.93276	0.0272817	0	0	0.0105316	3	0	0.934122	11.45	3.14735
629196	4.76	0	0.714286	2.998	3.1878	1	42.632	1.20502	0.597281	0	0.02	2	0	0.965999	6.89675	1.12738	0.037037	0	134.882	1.67293	0	0	0	76.6009	0	142.454	0.375145	0	0.597281	0	2	2.40685	149.046	0	0.654594	0.0204082	1.14369	0.008732	2.22e-16	7.25827	0.0185185	0	0	0	0	0	0.534361	0	0
104881	4.81	1	0.111111	1.007	2.1525	0.222222	40.7458	0.752875	0.774872	6	0.0855556	0	0.428571	0.147602	0	0.919712	0.0808081	0	147.377	2.40667	0	0	1	0	1	139.467	0.63211	0	0.849915	1	0	4.88359	129.758	0	0.486897	0	0.729733	-0.292557	0.0568238	8.05667	0.0590278	0	0	0	2	0	1.91573	6.59754	0.333333
95954	4.86	0	0	2.466	3.3524	0.4	46.7099	0.474649	0.818007	6	0.100741	0	0.461538	0.164154	0	0.800873	0.126984	0	224.726	2.66123	0	0	0	0	0	141.815	0.719165	0	0.91685	0	0	0.333333	189.378	0	0.518704	0	0.606585	-0.493072	4.44e-16	9.05584	0	0	0	0	4	0	3.78847	5.65685	3.30193
836306	4.95	0	0.176471	1.9	3.79749	0.235294	67.0847	0.825465	0.584376	12	0.0382222	0	0.5	0.950998	7.50338	0.946114	0.0606061	0.0123457	166.794	2.323	1	0	0	155.017	0	147.559	0.494208	1	0.785088	1	0	11.3306	183.849	0	0.672142	0.0145455	0.364133	-0.366229	0.00285209	7.63082	0.0192308	0	0	0.0123457	3	0	2.91078	10.1705	0.965489
602017	5.01	0	0.153846	1.431	1.86562	0.384615	41.6732	0.903445	0.807835	6	0.0540741	0	0.315789	9.15e-05	0	0.938111	0.0987654	0	182.23	3.0761	2	0	0	0	1	153.964	0.724142	0	0.866748	2	0	2.3811	136.857	0	0.517848	0	0.3722	0.00750009	0.0413195	9.33189	0.025	0	0	0	3	0	5.182	4.58576	2.3811
610399	5.08	0	0.153846	1.642	1.24902	0.384615	41.6732	0.903445	0.783055	6	0.0658333	0	0.315789	0.327274	9.47117	0.938111	0.0987654	0	167.003	3.0761	2	0	0	82.0136	1	153.964	0.724142	0	0.866748	2	0	1.65096	153.98	0	0.517848	0	0.368095	0.0133487	0.0208267	9.30536	0.0328283	0	0	0	3	0	5.182	5.8538	1.65096
93914	5.17	0	0.25	1.29	1.8484	0.333333	50.4013	0.97954	0.74396	6	0.0319192	0	0.272727	1.15436	7.34872	1.04999	0.0740741	0	161.002	2.78539	0	0	0	103.408	1	141.175	0.624606	0	0.84191	2	1	6.94563	161.264	0	0.771068	0.0164898	0.610843	-0.249624	0.0778775	7.7704	0.0329861	0	0	0	1	0	0.52548	7.4284	1.65096
107186	5.26	1	0.333333	0.116	0.09089	0.666667	17.424	1.33532	0.879588	0	0	0	0	0	0	1.42913	0.111111	0	54.2728	2.64644	0	1	1	0	0	150.859	0.796658	0	0.879588	0	0	1	31.0837	0	1.18307	0	1.15385	-0.530879	2.22e-16	6.71846	0	0	0	0	0	0	0.0669774	0	0
1198556	5.29	0	0	3.391	3.7114	0.5	53.0316	0.258131	0.662308	6	0.0755556	0	0.428571	0.173392	0	0.708971	0.148148	0	282.781	2.23593	0	0	0	0	0	144.421	0.587265	0	0.73735	0	0	0	192.564	0	0.616483	0	0.688909	-0.414282	1.67e-16	9.44535	0	0	0	0	6	0	3.0695	0	9.12547
944229	5.35	0	0.357143	3.662	3.86668	0.5	72.3348	0.950224	0.731162	6	0.0367407	1	0.206897	0.969047	7.03265	0.996087	0.0740741	0	212.272	2.84286	0	0	0	101.771	0	139.978	0.585193	0	0.841962	0	0	7.15874	184.151	0	0.516333	0.0178685	1.46463	-0.379924	0.0144493	7.43924	0.0144231	0	0	0.0204082	1	0	4.59888	3.4416	0
6639301	5.42	0	0	2.728	3.67482	0.4	49.3864	0.650603	0.769471	6	0.100741	0	0.4	0.161617	0	0.976912	0.126984	0	193.847	2.68925	0	0	0	0	1	139.415	0.688334	0	0.850608	0	0	0.333333	150.833	0	0.469922	0	0.716829	-0.408802	3.89e-16	8.07219	0	0	0	0	4	0	8.73734	5.65685	3.30193
5835267	5.54	2	0.0833333	6.316	5.05858	0.25	89.8182	1.15973	0.730963	0	0.0568889	0	0.269231	0.742301	7.18724	1.18944	0.131054	0	140.222	2.88388	0	1	2	115.692	1	142.998	0.505905	0	0.857418	1	7	10.9977	116.29	0	1.0663	0.0292653	0.313881	-0.597376	0.128424	7.18534	0.0402299	2	0	0.0217435	0	0	3.87342	12.8107	2.40685
4097498	5.65	0	0.176471	4.657	2.2241	0.529412	56.9034	1.01089	0.678565	6	0.0577778	0	0.206897	1.03967	9.32407	1.07562	0.111111	0	144.17	3.29646	2	0	0	84.0588	1	152.063	0.678565	0	0.706958	2	0	0.5	151.383	0	0.677552	0	0.354871	-0.331716	0.0292132	8.00419	0.0678662	0	0	0	4	0	6.90376	5.11154	3.53278
4901513	5.75	0	0	3.043	4.0058	0.454545	51.4261	0.377356	0.750549	6	0.0795062	0	0.461538	0.178593	0	0.783216	0.138889	0	285.619	2.46967	0	0	0	0	0	141.269	0.667399	0	0.91685	0	0	0	220.738	0	0.586393	0	0.595799	-0.378319	1.05e-16	9.81875	0	0	0	0	5	0	5.35969	3.04182	6.08364
82713	5.91	0	0.176471	4.737	0.3994	0.470588	43.8199	0.565174	0.742422	6	0.0495019	0	0.3	0.0270368	9.47117	0.871487	0.106667	0	211.189	3.07095	3	0	0	82.0136	0	163.474	0.710551	0	0.797431	3	0	0	177.929	0	0.60475	0	0.625494	-0.289616	7.44e-16	10.1217	0.0631944	0	0	0	5	0	0.841072	3.04182	6.08364
298022	6.02	0	0.666667	3.809	3.3983	0.916667	67.4418	1.11703	0.683918	0	0.0228571	2	0	1.15079	7.31333	1.23461	0.0952381	0	204.36	2.29883	0	0	0	101.127	0	142.863	0.468491	0	0.740062	0	0	1.47084	170.221	0	0.563866	0.0102041	1.34906	-0.625275	0.186755	7.68728	0.0222222	0	0	0	0	0	9.07696	0	0
786196	6.16	0	0.444444	4.23	4.52399	0.611111	92.451	0.896314	0.74846	6	0.0264327	2	0.176471	1.1128	7.52301	1.05906	0.0869565	0.0144373	221.864	3.17512	0	0	0	150.662	0	140.291	0.624107	0	0.783148	0	0	5.32517	193.919	0	0.51197	0.0176327	1.36433	-0.609619	0.0619365	7.71215	0.0282407	0	0	0.0133325	2	0	15.8834	5.51069	0.333333
19902046	6.35	4	0.521739	5.4	5.37086	0.826087	112.352	1.3665	0.605468	0	0.0288	0	0	1.05834	7.15238	1.52091	0.0740741	0.00680603	121.466	2.4458	0	0	0	128.16	4	146.085	0.409182	0	0.651966	0	4	15.8663	119.423	0	1.27744	0.0120937	0.892541	-0.253855	3.01e-16	7.17011	0.0277778	0	0	0.0111111	0	0	26.792	10.7581	0.838336
1582098	6.5	0	0.347826	4.226	3.5251	0.652174	71.8764	1.14068	0.736746	6	0.0534392	0	0.153846	0.659581	8.07417	1.13408	0.0942761	0	187.533	3.26456	2	0	0	126.859	1	154.955	0.617656	0	0.756151	2	2	4.84461	194.455	0	0.60573	0.0173061	0.316406	-0.434409	0.0804582	8.38861	0.0472524	0	0	0.0185185	4	0	3.41769	8.86263	3.53278
70382	6.66	1	0.227273	4.73	3.61093	0.5	90.4323	1.14793	0.711627	6	0.0564744	0	0.255319	1.34889	7.41439	1.22829	0.148148	0.00454035	133.683	2.83933	0	0	1	114.862	4	142.715	0.511168	0	0.791128	1	0	2.89489	140.827	0	0.998152	0.0218413	0.508022	-0.472681	0.0398831	7.59231	0.0279419	2	0	0.00944081	3	0	17.7738	10.9712	5.89189
59756604	7.18	2	0.115385	4.095	3.96247	0.269231	88.7072	0.86928	0.735264	14	0.0442042	0	0.473684	0.960961	7.90663	0.867273	0.0818713	0.00775431	201.254	3.03496	0	0	2	167.057	5	144.642	0.578315	0	0.854481	1	0	13.6789	217.912	0	0.601958	0.0190915	0.381716	-0.393549	0.0196494	8.01777	0.0320946	0	1	0.012717	1	0	4.5203	20.3938	6.63198
17109363	7.69	0	0.185185	4.285	6.0147	0.481481	103.905	0.853522	0.780222	12	0.0578811	0	0.318182	0.967438	8.05033	1.07208	0.108401	0.0112088	178.079	3.82819	1	0	1	195.32	3	146.681	0.701207	1	0.83332	2	0	1.60909	183.618	0	0.562263	0.0184068	0.395445	-0.55537	0.206555	8.21399	0.0367868	0	0	0.0155908	8	0	13.8697	10.6322	12.2297
57556	0.24	0	0.25	-0.748	-0.6405	1	19.138	1.48492	0.818007	0	0	0	0	0	0	1.73475	0.111111	0	49.8783	2.19969	0	0	0	0	0	154.115	0.59444	0	0.859582	0	1	0	31.0837	0	1.18996	0	1.00107	-0.538691	0.0608102	6.71846	0	1	0	0	0	0	0.824646	1	0
109875	1.04	0	0.5	-0.033	0.2367	1	18.8655	1.81461	0.552864	0	0	0	0	0	0	2.60572	0.0740741	0	67.8212	1.54659	0	0	0	0	0	153.196	0.417949	0	0.552864	0	0	0	114.737	0	1.01702	0	1.81328	-0.327591	1.11e-16	7.11763	0	0	0	0	0	0	0.00962361	0	0
16079882	1.23	0	0	1.028	1.4929	0.363636	42.8668	0.908475	0.748013	0	0	0	0.294118	0	0	1.90132	0.17284	0	140.016	2.93983	0	0	1	0	0	154.154	0.719231	0	0.748013	2	0	0	103.587	0	0.449093	0	0.505995	-0.600422	0.03448	9.23918	0	0	0	0	0	0	2.17858	0	0.5
71363	1.63	0	0.5	0.851	0.7788	1	18.9987	1.61168	0.748225	0	0	0	0	0	0	1.70479	0.0740741	0	72.7705	1.8716	0	0	0	0	0	149.787	0.479052	0	0.782352	0	2	2.3811	50.7873	0	1.39465	0	0.91913	-0.486763	1.11e-16	7.4399	0	0	0	0	0	0	0.947508	0	0
109762	1.79	0	0.5	-0.984	-0.7061	1	20.7802	1.5167	0.624595	0	0	0	0	0	0	1.7616	0.0740741	0	67.7681	2.07291	0	0	0	0	0	163.586	0.530577	0	0.624595	0	1	2.3811	49.7112	2	1.5034	0	1.00139	-0.584321	1.11e-16	7.23859	0	0	0	0	0	0	3.11381	0	0
62759	1.9	0	0.25	-0.275	0.2294	0.75	20.0505	1.68355	0.539867	0	0	0	0	0	0	2.29871	0.111111	0	51.4557	1.86763	0	0	0	0	0	165.522	0.539867	0	0.448958	1	0	0	0	0	0.831363	0	0.322266	-0.181852	0.0608102	0	0	0	0	0	0	0	0.00824464	0	0
584021	2.11	0	0.4	1.1	1.1673	1	23.5831	1.59037	0.63349	0	0	0	0	0	0	1.66171	0.133333	0	82.6549	1.83361	0	0	0	0	0	148.827	0.439721	0	0.63349	0	3	0.5	51.997	0	1.40945	0	0.842034	-0.537323	8.91e-17	6.81826	0	1	0	0	0	0	0.968453	2	0
111411	2.16	0	0.666667	-1.661	-1.473	1	28.9355	1.49762	0.758275	0	0.0266667	0	0	0.458986	7.50355	2.0319	0.0444444	0	94.34	2.48426	0	0	0	48.6107	0	161.166	0.584816	1	0.851321	0	0	2.94168	87.7824	1	1.29602	0	1.04236	-0.495072	1.11e-16	7.41797	0.0277778	0	0	0	0	0	2.50969	0	0
108101	2.28	0	0.333333	1.515	1.6215	0.833333	29.5874	1.4923	0.699362	0	0	0	0	0	0	1.58332	0.0634921	0	83.8365	1.87848	0	0	0	0	0	145.821	0.44221	0	0.699362	1	1	0	93.4368	0	1.21233	0	0.49305	-0.36842	1.11e-16	7.73305	0	1	0	0	0	0	0.125174	2	0.5
75092	2.41	0	0	1.519	1.4215	1	16.4383	0.71616	0.455459	0	0	0	0	0	0	2.28321	0	0	0	1.52193	0	0	0	0	0	149.571	0.655459	0	0	0	0	0	0	0	0.550824	0	0.776737	-0.358076	4.44e-16	0	0	0	0	0	0	0	1.15111	0	0
109977	2.5	0	0	0.819	0.5328	0	22.4206	0.926249	0.759176	5	0	0	0.5	0	0	1.26961	0	0	31.0837	2.12193	0	0	2	0	0	151.783	0.638764	0	0.759176	0	0	4.24264	0	0	0.906555	0	1.2093	-0.266436	0	0	0	0	0	0	0	0	0.277518	0	0
122996	2.6	0	0.3	0.558	1.0577	0.4	43.8916	1.03918	0.694991	6	0.0251852	0	0.3	1.07181	7.39451	1.18915	0.040404	0	150.845	2.66096	0	0	0	80.5694	0	145.544	0.615689	0	0.85244	0	0	8.364	145.444	0	0.896428	0.0201361	1.11098	-0.390738	0.162869	7.40002	0.0180556	0	0	0	1	0	0.133517	3.79984	0
110587	2.69	0	0.6	1.353	1.1353	1	23.5678	1.59807	0.699362	0	0.04	0	0	0.367783	6.71846	1.641	0.0555556	0	83.0324	1.88958	0	0	0	31.0837	0	152.804	0.444824	0	0.758275	0	3	3.96541	72.2196	1	1.57644	0	0.921046	-0.532869	2.22e-16	7.05043	0	0	0	0	0	0	2.4056	0	0
868779	2.76	0	0.5	0.005	0.02419	0.75	32.7099	1.28375	0.817188	0	0.048	0	0	1.14256	7.57504	1.58534	0.123457	0	121.66	3.00311	0	1	2	55.9046	1	149.102	0.706959	0	0.841968	1	0	1	161.501	0	0.915919	0	0.77455	-0.618041	0.132883	7.93448	0.0277778	0	0	0	0	0	0.3915	1.37318	1
110123	2.86	0	0.428571	2.084	2.0116	0.857143	34.0392	1.49321	0.732287	0	0.08	0	0	1.25577	6.71846	1.57141	0.0833333	0	87.7357	1.94566	0	0	0	31.0837	0	145.611	0.436302	0	0.732287	1	2	1	98.2236	0	1.24448	0	0.486303	-0.354728	7.77e-16	7.1736	0	1	0	0	0	0	0.371368	2.82843	0.333333
75898	2.93	0	0.2	0.926	0.541	1	13.7114	1.29224	0.76323	0	0	0	0	0	0	1.31345	0.0952381	0	74.1835	2.41938	0	0	0	0	0	170.016	0.76323	0	0.652119	0	0	0	0	0	0.606953	0	0.662054	-0.632238	0.108212	0	0	0	0	0	0	0	0.42172	0	0
88755	3	0	0.1	1.81	1.1594	0.3	35.779	0.78817	0.829361	6	0.0377778	0	0.4	8.03e-05	0	0.831439	0.102564	0	151.586	2.84022	1	0	0	0	0	151.42	0.726978	0	0.965872	1	0	3.96541	105.322	0	0.63131	0	0.47568	-0.428509	0.0515001	8.70842	0.0625	0	0	0	2	0	1.11007	4.29828	1
110009	3.05	0	0	0.709	1.2796	0	20.7397	0.951887	0.719587	5	0	0	0.555556	0	0	1.20267	0	0	31.0837	1.83659	0	0	2	0	0	144.396	0.57938	0	0.719587	0	0	4.24264	0	0	0.711924	0	1.27385	-0.206054	0	0	0	0	0	0	0	0	0.0678602	0	0
75070	3.12	1	0	0.334	0.2052	0.5	11.7183	1.48493	0.758039	0	0	0	0	0	0	1.74995	0	0	0	2.12809	0	0	1	0	0	148.771	0.758039	0	0.472325	1	0	0	0	0	0.921723	0	0.750825	-0.246021	5.55e-16	0	0	0	0	0	0	0	0.0333063	0	0
496162	3.17	0	0	1.068	2.12229	0	39.8465	0.920329	0.798523	6	0.0243056	0	0.529412	0	0	1.05094	0.0683761	0	142.209	2.6757	0	0	0	0	1	141.446	0.654611	0	0.913653	0	1	6.86172	73.3893	0	0.781336	0	1.15932	-0.272298	0.0544771	7.05242	0	0	0	0	2	0	0.764051	6.66899	1
91225	3.22	0	0	0.468	2.2348	0	45.8555	0.812839	0.719231	10	0.0474074	0	0.588235	0.739244	6.71846	1.00916	0.0634921	0	164.079	2.01915	0	0	1	31.0837	1	141.129	0.493987	0	0.942435	0	0	8.73703	124.266	0	0.730655	0	1.01332	-0.275985	2.78e-17	7.11825	0	0	1	0	0	0	0.149924	7.23257	1
121324	3.28	1	0.25	1.012	2.10419	0.416667	48.5724	0.995889	0.882682	6	0.0593939	0	0.272727	1.05002	7.3605	1.16816	0.0888889	0	172.599	3.26104	0	0	1	78.6341	1	145.046	0.731269	0	0.931148	1	0	3.68599	151.067	0	0.800807	0.0202041	0.710972	-0.413991	0.0622933	7.88372	0.0329861	0	0	0	3	0	0.0416568	7.94418	1.65096
529204	3.36	1	0.111111	1.455	1.52712	0.222222	40.3116	0.956513	0.758877	6	0.0524444	0	0.352941	2.65e-05	0	0.999992	0.10101	0	134.952	2.65426	0	0	1	0	2	140.746	0.649365	0	0.902789	1	0	5.08568	73.9259	0	0.814144	0	0.674041	-0.192863	0.0850147	7.52988	0.0625	0	0	0	2	0	2.13686	5.67624	1
700583	3.39	0	0	1.842	2.0116	0	42.5218	1.07181	0.558821	0	0.0684444	0	0.4	2.81e-05	0	1.1111	0.0444444	0	88.9744	1.88735	0	0	0	0	0	141.429	0.406419	0	0.621005	1	5	4.35275	67.7514	0	0.938517	0	0.436574	-0.289063	0.0518359	7.10672	0.0625	4	0	0	0	0	0.728292	13.6409	5.29612
102272	3.44	0	0.2	1.813	2.14642	0.4	47.856	1.12553	0.812482	6	0.0488889	0	0.26087	0.867382	6.90854	1.29377	0.0555556	0	131.953	2.78443	0	0	0	70.9184	1	146.817	0.61554	1	0.889374	0	0	4.32964	125.047	0	1.0933	0.02	0.80845	-0.346313	0.14832	7.19385	0.0364583	0	0	0	2	0	1.78303	5.67624	0.5
107131	3.47	1	0	0.32	0.62217	0	16.2707	1.02027	0.898227	0	0	0	0	0	0	1.13018	0.111111	0	86.9662	2.12809	0	1	1	0	0	146.102	0.758039	0	0.755369	0	0	1	0	0	0.798982	0	0.542435	-0.484594	2.22e-16	0	0	0	0	0	0	0	0.40386	0	0
100107	3.51	1	0.181818	0.964	2.09219	0.363636	49.6487	1.0926	0.69921	6	0.0527778	0	0.272727	0.519084	7.70088	1.47153	0.0952381	0	133.465	2.77219	0	0	1	152.335	1	146.192	0.621645	0	0.780753	1	0	4.88359	104.684	0	0.865229	0.0272109	0.65948	-0.16194	0.0313481	7.21341	0.0746528	0	0	0	2	0	0.618425	6.59754	0.333333
368774	3.56	0	0.0833333	1.548	2.23598	0.333333	41.1488	0.829024	0.769455	6	0.0581818	0	0.375	0.869329	0	0.798496	0.0915033	0	177.008	2.70282	0	0	0	0	2	148.691	0.675705	0	0.894455	0	0	4.94145	190.337	0	0.490144	0	0.397319	-0.606911	0.0607656	9.58547	0.0520833	0	0	0	2	0	4.60102	6.2612	0.5
2362610	3.6	0	0.0714286	2.513	2.7051	0.142857	51.6876	1.05166	0.685093	6	0.025641	0	0.413793	1.01426	6.99234	1.0615	0.0740741	0	133.064	2.63596	0	0	0	78.9228	1	142.79	0.542604	0	0.852678	0	5	12.4072	128.198	0	1.02966	0.0236735	0.817372	-0.395304	0.0483221	7.26914	0.0166667	2	0	0	1	0	0.0472628	11.3998	2.3811
576261	3.66	0	0	1.308	1.87354	0.333333	41.1253	1.00921	0.674582	6	0.0833333	0	0.315789	0	0	1.02288	0.12963	0	121.411	2.72058	0	0	0	0	2	143.736	0.640449	0	0.758275	0	0	2.3811	74.6078	0	0.992723	0	0.564921	-0.543679	2.42e-16	7.0098	0	0	0	0	3	0	3.00364	4.58576	2.3811
107471	3.7	0	0.25	3.411	3.3166	1	46.7945	1.41533	0.278961	0	0	1	0	0	0	1.3744	0.0512821	0	93.277	1.32643	0	0	0	0	0	144.242	0.278961	0	0.278961	0	0	0	114.737	0	1.05964	0	0.661514	-0.583821	1.11e-16	7.11763	0	0	0	0	0	0	7.0639	0	0
121142	3.75	0	0.153846	1.431	1.86562	0.384615	41.6732	0.903445	0.807835	6	0.052381	0	0.315789	0.386713	9.47117	0.938111	0.111111	0	166.237	3.0761	2	0	0	82.0136	1	153.964	0.724142	0	0.891527	2	0	1.65096	130.622	0	0.517848	0	0.368095	-0.205446	0.0483912	8.89875	0.0648148	0	0	0	3	0	5.182	5.8538	1.65096
2028639	3.78	0	0	0.295	0.07999	0.5	19.6254	1.13207	0.875048	0	0	0	0	0	0	1.17904	0.111111	0	78.0032	2.73216	0	0	0	0	0	148.452	0.789771	0	0.875048	0	1	0	31.0837	0	1.07764	0	0.831157	-0.602886	0.0608102	6.71846	0	1	0	0	0	0	0.0933303	1	0
371404	3.82	0	0	0.44	1.4079	0.25	34.6334	0.80362	0.73735	6	0.151111	0	0.428571	2.25459	0	0.796226	0.0888889	0	101.077	2.52164	0	0	0	0	0	152.027	0.662308	0	0.812393	0	0	3.30193	69.2807	1	0.742907	0	0.58494	-0.585239	1.11e-16	7.48023	0	0	0	0	2	0	0.0135722	5.65685	0.333333
106230	3.84	2	0.5	3.591	2.88409	0.8	48.3847	1.3986	0.77098	0	0.02	0	0	0.814172	7.21532	1.44999	0.0808081	0	103.862	2.44419	0	0	1	120.244	1	144.668	0.503128	0	0.799373	1	3	4.5088	101.837	0	1.22437	0.0136054	0.597387	-0.148193	0.0160007	7.21133	0.037037	1	0	0	0	0	4.17467	4.64039	0.25
105679	3.87	0	0	1.519	1.87354	0.333333	41.1253	1.00921	0.724142	6	0.103333	0	0.315789	0.121288	6.71846	1.02288	0.111111	0	115.5	2.72058	0	0	0	31.0837	2	143.736	0.640449	0	0.807835	0	0	1.65096	84.5203	0	0.992723	0	0.516034	-0.534094	0.0232586	7.04823	0	0	0	0	3	0	3.00364	5.8538	1.65096
121733	3.92	0	0.1	1.61	2.1072	0.3	38.8897	0.723138	0.812393	6	0.0660317	0	0.428571	0.000121	0	0.833934	0.0854701	0	171.824	2.6645	1	0	0	0	0	148.485	0.699829	0	1	1	0	3.53278	185.907	0	0.457355	0	0.371669	-0.304104	0.0440003	9.82332	0.03125	0	0	0	2	0	3.94181	5.11154	0.5
1745819	3.95	1	0.2	1.983	2.41748	0.3	46.243	0.951529	0.838035	6	0.0488889	0	0.3	0.862323	6.83821	0.959743	0.0925926	0	142.003	2.83935	0	1	1	56.1796	1	142.889	0.656965	0	0.930587	0	1	6.63198	121.815	0	0.951137	0.04	0.651154	-0.496333	0.163926	7.28098	0.0225694	0	0	0	2	0	2.80027	6.44742	1
127184	4	0	0	3.026	2.99439	0.8	30.9454	1.5	0.355245	0	0	0	0	0	0	1.5	0.148148	0	0	0.918296	0	0	2	0	0	142.174	0.355245	0	0.150863	0	0	0	0	0	1.5	0	1.25	-0.4	4.44e-16	0	0	0	0	0	0	0	5.89907	0	1
123079	4.07	0	0.111111	1.802	1.9546	0.333333	41.6917	1.00921	0.767628	6	0.0855556	0	0.315789	0.748764	8.16134	1.02288	0.0808081	0	125.903	2.79479	0	0	0	70.4908	1	143.736	0.657918	0	0.866748	0	1	4.88359	89.7601	0	0.992723	0	0.524199	-0.524037	0.0568238	7.03433	0.0590278	0	0	0	2	0	0.905543	6.59754	0.333333
99887	4.13	0	0.1	1.895	2.3922	0.4	47.5533	1.06654	0.697143	6	0.0637037	0	0.26087	0.971958	7.63171	1.06847	0.102564	0	119.879	2.79958	0	0	0	86.9093	1	147.149	0.618889	0	0.774036	0	0	3.30193	94.517	1	1.12276	0	0.493343	-0.54102	0.0154558	6.98705	0.0787037	1	0	0	2	0	0.341056	7.06555	1.31037
22104627	4.18	0	0.375	0.161	1.00699	0.875	39.1281	1.56006	0.73628	0	0.0533333	0	0	0.716548	6.71846	2.0466	0.111111	0	95.6827	2.05982	0	0	0	31.0837	0	149.928	0.449256	0	0.73628	1	0	0	96.335	0	1.17939	0	0.546703	-0.176026	0.0465054	7.15631	0	1	0	0	0	0	0.0730621	1.41421	1
330541	4.22	0	0.214286	1.331	3.68699	0.5	61.0519	0.880738	0.73628	6	0.0644444	0	0.25	1.32359	7.44472	1.60331	0.105263	0	151.402	3.29248	0	0	0	138.461	0	150.008	0.718104	1	0.822701	1	0	1.65096	179.76	0	0.519709	0.0315646	0.50019	-0.75035	0.07991	7.88353	0.0309343	0	0	0	3	0	1.61519	6.44742	2.40685
110827	4.27	0	0	3.414	2.3406	0	17.4696	1.41667	0.220219	0	0	0	0.333333	0	0	1.41667	0	0	58.968	0.918296	0	0	0	0	0	144.346	0.220219	0	0.220219	0	6	9.12547	31.0837	0	1.41667	0	1.41667	8.64e-17	7.22e-16	6.71846	0	0	0	0	0	0	2.98598	0	0
585342	4.32	0	0.0909091	2.718	2.6897	0.454545	50.468	1.10608	0.644397	6	0.0666667	0	0.24	0.881395	6.71846	1.12009	0.0972222	0	112.378	2.67249	0	0	0	31.0837	1	143.883	0.575489	0	0.713305	0	0	3.53278	110.512	0	1.07502	0	0.441617	-0.539394	0.0151942	7.20366	0.03125	0	0	0	2	0	4.84396	5.11154	0.5
1929824	4.37	0	0.0909091	2.196	3.6805	0.454545	53.1637	0.586428	0.82159	6	0.0666667	0	0.428571	0.14491	0	1.28748	0.0972222	0	282.355	2.78845	0	0	1	0	0	143.195	0.732385	0	0.910795	0	0	2.3811	319.389	0	0.522267	0	1.07745	-0.627815	0.0151942	9.81821	0.03125	0	1	0	2	0	6.71121	3.30193	0.5
693163	4.4	0	0.625	2.951	2.304	1	33.9754	1.56196	0.587805	0	0.032	0	0	0.910971	7.03319	1.58107	0.0555556	0	90.1056	1.76819	0	0	0	83.0324	0	149.985	0.36781	0	0.734228	0	6	5.67624	93.2091	1	1.5524	0.0272109	0.743273	-0.529542	0.0682267	7.01696	0.0277778	1	0	0	0	0	4.56976	1.91926	0
50317	4.42	0	0.0833333	2.08	3.345	0.416667	51.1036	0.492948	0.803599	6	0.0546032	0	0.4	0.47382	6.71846	0.829257	0.117647	0	284.386	3.00624	0	0	1	31.0837	1	141.582	0.769471	0	0.965872	1	0	1	204.125	0	0.525506	0	0.37279	-0.570308	0.0544458	9.60427	0.025	0	0	0	4	0	4.30189	4.7451	6.08364
6203185	4.47	3	0.230769	1.447	2.01588	0.384615	59.8922	1.07684	0.674544	6	0.0383838	0	0.230769	0.768658	7.70014	1.39746	0.0833333	0	148.314	2.67463	0	0	1	156.476	1	145.233	0.569017	0	0.801453	1	0	8.56995	126.901	0	0.883818	0.0236735	0.657008	-0.164318	0.132343	7.16498	0.0407986	0	0	0.0164609	2	0	1.31676	7.17834	0.333333
95738	4.54	0	0	2.151	3.02142	0.333333	44.6702	0.735565	0.769471	6	0.103333	0	0.4	0.151827	0	0.982648	0.111111	0	160.988	2.68925	0	0	0	0	1	139.889	0.688334	0	0.884735	0	0	1.65096	95.7461	0	0.472996	0	0.795189	-0.47468	0.0232586	7.24431	0	0	0	0	3	0	6.6936	5.8538	1.65096
79776	4.58	2	0.142857	3.65	3.51058	0.428571	60.6615	1.2343	0.739732	0	0.0482963	0	0.176471	0.662044	7.82267	1.26922	0.122222	0	130.448	2.58574	0	0	0	112.696	2	143.062	0.508257	0	0.809107	1	3	4.20686	114.758	0	1.11155	0.00749536	0.435275	-0.34853	0.249545	7.07178	0.0534722	0	0	0	0	0	2.4863	6.53405	1.31037
67367	4.63	1	0.1875	1.566	3.79219	0.1875	67.2599	0.853525	0.609943	12	0.0410256	0	0.52	1.01877	7.19297	0.962565	0.0444444	0.0123457	175.315	2.09391	0	0	1	160.452	1	139.984	0.450899	0	0.821227	1	0	13.1246	198.963	0	0.703245	0.016	0.727883	-0.332778	0.0212962	7.55078	0.0109954	0	0	0.00740741	3	0	1.87992	11.2071	0.965489
78342	4.69	0	0.5	4.104	4.088	0.666667	109.865	1.09943	0.560446	0	0.0395322	2	0.12	1.10466	7.84643	1.35099	0.0902778	0.00826446	231.228	2.36943	0	0	0	139.284	0	144.156	0.419825	0	0.599495	0	0	2.56145	204.406	0	0.473394	0.0202641	1.52622	-0.518222	2.78e-16	8.28501	0.0176426	2	1	0.0139582	0	0	16.8707	3.27954	1
90028	4.73	1	0.111111	0.989	1.2047	0.222222	37.6351	0.817796	0.829361	6	0.0524444	0	0.4	4.38e-05	0	0.87552	0.10101	0	135.941	2.59958	0	0	1	0	1	143.003	0.665384	0	0.965872	1	0	5.08568	82.964	0	0.75374	0	0.730319	-0.402055	0.0850147	7.8273	0.0625	0	0	0	2	0	0.204575	5.67624	1
583539	4.77	0	0	2.322	3.2116	0.25	46.0242	0.572058	0.535095	6	0.111111	0	0.5	0	0	0.771019	0.111111	0	183.683	1.9183	0	0	0	0	0	136.609	0.535095	0	0.628076	0	0	3.96541	108.939	0	0.494072	0	1.24323	-0.337041	5.55e-17	7.80192	0	0	0	0	2	0	5.33056	4.29828	1
39905572	4.81	0	0.428571	3.052	3.2279	0.571429	57.7097	1.18751	0.719131	6	0.0342222	0	0.181818	0.929993	7.29911	1.27763	0.0555556	0.0144373	122.702	2.79877	0	0	0	131.421	0	147.377	0.554827	0	0.839276	0	4	11.0448	121.254	1	1.10145	0.0126531	0.73626	-0.450726	0.191037	7.21024	0.0162037	0	0	0.0095742	2	0	2.20018	6.27247	0.333333
72548	4.86	0	0.157895	3.403	5.9123	0.368421	87.8586	0.685023	0.643404	12	0.0451852	0	0.464286	0.967438	8.05317	0.915345	0.0854701	0	226.736	2.73593	0	0	0	218.64	2	138.525	0.569113	0	0.732553	0	0	8.6919	212.51	0	0.466813	0.0353061	1.04697	-0.352587	2.22e-16	7.73714	0.0214646	2	0	0.00987654	4	0	18.6477	17.8275	5.31369
83329	4.95	0	0	3.458	2.9384	0	56.4434	0.802083	0.658438	10	0.0213889	0	0.545455	0.385	6.71846	0.802083	0.0666667	0	178.406	2.41309	0	0	0	31.0837	4	137.764	0.54112	0	0.75537	0	2	10.6222	109.262	0	0.802083	0	0.871867	-0.0158577	3.89e-16	7.03898	0	0	0	0	2	0	2.82711	14.987	4.24264
14816183	5.01	0	0.368421	3.629	3.09907	0.473684	81.518	1.02183	0.723228	6	0.0246296	0	0.176471	0.952913	7.5953	1.24393	0.0925926	0.0123457	212.879	3.25103	0	0	0	177.269	1	145.111	0.639029	0	0.778783	0	0	7.46518	197.542	0	0.540031	0.0172653	0.679922	-0.55161	0.0161494	8.4124	0.0297619	0	0	0.00660891	1	0	6.98386	6.2852	1
56382	5.09	0	0.388889	3.36	3.30149	0.555556	72.4818	1.06077	0.740564	6	0.0357488	0	0.1875	1.18408	7.27351	1.30873	0.0925926	0	210.896	3.2744	1	0	0	132.654	0	147.334	0.654879	0	0.790564	1	0	4.34812	188.353	0	0.518383	0.0188844	0.469923	-0.7372	0.0613291	8.43965	0.0243056	0	0	0.0139582	2	0	7.15937	5.46569	0.333333
14938353	5.18	0	0.333333	3.509	3.1249	0.5	50.8401	1.14136	0.745445	6	0.0427778	0	0.214286	0.960062	7.26613	1.15515	0.0634921	0	122.01	2.70705	0	0	0	121.172	1	143.932	0.563105	0	0.860668	0	4	10.5179	118.664	0	1.10711	0.0168707	0.497126	-0.494257	0.17554	7.05237	0.0208333	0	0	0.0225498	2	0	0.0111514	7.24155	0.333333
30560191	5.26	0	0.444444	-0.269	0.26	0.777778	40.3611	1.19265	0.834973	0	0.0355556	1	0	0.719151	6.71846	1.69375	0.111111	0	159.163	2.89546	0	0	1	31.0837	0	149.274	0.669947	1	0.834973	2	0	0	126.339	0	0.653869	0	0.706097	-0.870508	0.0795939	7.76425	0	0	0	0	0	0	4.62e-05	0	0
99354	5.29	0	0.2	1.467	0.9882	0.4	40.6089	0.786038	0.619906	6	0.0585185	0	0.333333	3.81e-05	0	0.885443	0.0952381	0	187.426	2.58496	3	0	0	0	0	161.037	0.619906	0	0.619906	3	0	1.5	230.037	0	0.400808	0	0	-0.124699	1.28e-16	10.7186	0.0578704	0	0	0	3	0	4.17507	6.24025	1.5
81196	5.38	0	0.0909091	2.802	4.1285	0.454545	54.55	0.584225	0.782352	6	0.0344444	0	0.4	0.115551	0	0.973588	0.103704	0	293.76	2.87291	0	0	0	0	1	138.942	0.735343	0	0.863489	0	0	2.3811	163.883	0	0.497254	0	1.14319	-0.34879	0.0627605	8.40001	0.0625	1	0	0	3	0	9.88977	5.36866	4.24264
29590429	5.44	1	0.666667	4.098	2.85819	0.833333	48.5304	1.41723	0.714596	0	0.0266667	0	0	0.918543	7.3071	1.56921	0.0683761	0	106.375	2.49161	0	1	2	108.884	0	145.738	0.493937	0	0.798698	1	4	6.10059	116.19	0	1.13247	0.0174927	0.469031	-0.645216	0.0300349	7.24995	0.0208333	1	0	0.0197531	0	0	0.236002	3.91334	0.142857
105759	5.56	2	0.666667	2.926	2.15539	0.8	55.62	1.35931	0.648019	0	0.0342857	0	0	1.33257	8.00611	1.62672	0.0694444	0.00413223	134.296	2.47385	0	0	2	138.584	0	146.39	0.478508	0	0.691003	2	4	6.99169	143.079	0	0.947775	0.0102041	0	-0.655327	6.11e-16	8.03371	0.0198413	0	0	0.00925926	0	0	0.910116	5.05461	0.333333
61788327	5.67	4	0.1	6.614	5.18638	0.1	81.1127	1.03175	0.700417	6	0.0102222	0	0.45	0.997639	7.05771	1.03175	0.0683761	0.00408122	146.543	2.70161	0	0	0	141.494	2	140.585	0.507637	0	0.827342	0	6	23.1471	140.394	0	1.03175	0.0266667	1.08852	-0.0159346	9.99e-16	7.05595	0.0228758	2	0	0.000857	2	0	5.78018	18.689	2.40685
55792615	5.77	0	0.526316	4.261	4.88509	0.631579	72.1767	1.23799	0.698065	6	0.0311111	0	0.136364	0.985362	7.27352	1.42952	0.0505051	0.00596311	140.207	2.77879	0	0	1	122.092	0	146.251	0.508988	1	0.810546	1	6	14.6997	142.409	0	1.04393	0.0148027	0.550518	-0.505897	0.309865	7.40667	0.0168129	0	0	0.00746696	2	0	3.74152	7.8262	1.65096
3309680	5.93	0	0.692308	4.167	3.7884	0.923077	70.9738	1.14169	0.708471	0	0.0213333	2	0	1.11667	7.29996	1.24997	0.0888889	0	188.233	2.33332	0	0	0	116.347	0	143.002	0.462557	0	0.758119	0	1	2.61166	177.025	0	0.578637	0.0136054	1.31827	-0.615849	0.222886	7.67885	0.020202	0	0	0.0123457	0	0	5.92922	0	0
2921882	6.04	0	0.333333	4.386	4.88949	0.611111	79.4259	0.883801	0.776338	6	0.0535185	0	0.206897	1.14906	7.75429	1.5022	0.106667	0	262.759	3.27266	0	0	2	166.976	0	145.089	0.673668	0	0.790535	0	0	0.572357	236.442	0	0.472134	0.0248073	0.988134	-0.741867	0.0566487	8.71565	0.025463	0	1	0.0150332	4	0	13.7522	3.4804	3.30193
327980	6.17	0	0.294118	5.285	6.18128	0.588235	80.0401	0.841584	0.799373	6	0.061164	0	0.206897	1.03681	7.61705	1.22552	0.111111	0	245.832	3.17767	0	0	0	151.919	0	141.687	0.654113	0	0.889909	0	0	1.43247	220.458	0	0.489613	0.0270476	1.12262	-0.51077	0.0635377	7.93534	0.0252193	0	0	0.0112749	4	0	7.24902	6.11401	3.30193
608731	6.37	0	0	3.834	3.6444	0.5	54.081	0.630914	0.380094	0	0.0755556	0	0.333333	0	0	1.35246	0.148148	0	227.018	1.58496	0	0	0	0	0	141.979	0.380094	0	0.380094	0	6	0	196.344	0	0.511556	0	1.04987	2.39e-17	1.67e-16	9.20212	0	6	0	0	0	0	17.3339	0	9.12547
107028	6.52	2	0.333333	0.293	0.29749	0.333333	16.366	1.19154	0.916667	0	0	0	0	0	0	1.33331	0.111111	0	56.5487	2	0	1	2	0	0	145.632	0.666667	0	0.791667	1	0	1	0	0	0.833813	0	0.922787	-0.32805	0	0	0	0	0	0	0	0	0.166791	0	0
957517	6.7	0	0.210526	2.656	2.89	0.315789	81.9279	0.99608	0.57533	12	0.0393162	0	0.371429	1.257	7.09197	1.22471	0.0711111	0	174.301	2.55528	0	0	1	111.175	2	143.037	0.498175	0	0.682386	1	0	13.9953	192.048	0	0.863099	0.0161633	0.64407	-0.329981	1.53e-16	7.54697	0.0168651	1	0	0	2	0	3.38818	14.2708	4.24264
76448	7.21	2	0	3.55	5.09388	0.368421	75.801	0.515673	0.898071	0	0.0576587	0	0.454545	0.160362	0	0.935216	0.171429	0	288.8	3.26104	0	0	0	0	0	137.887	0.731269	0	0.959228	0	2	1	261.624	0	0.497985	0	1.18198	-0.0772946	0.111386	9.24191	0.0366414	3	0	0	0	0	16.2627	4.47979	5.08568
10453868	7.74	1	0.259259	4.775	4.53189	0.407407	106.228	1.05379	0.781246	11	0.0442294	0	0.352941	1.26533	7.37865	1.17002	0.104938	0.011758	140.243	3.26912	0	0	2	123.177	3	142.215	0.576318	0	0.834858	1	1	11.5209	168.675	0	0.883955	0.02161	0.589639	-0.397129	0.0791411	7.6768	0.0193426	2	0	0.0148006	3	0	10.6433	15.2958	5.31625
67685	0.36	0	0	-0.718	0.8604	0.666667	20.5586	1.33399	0.472903	0	0	0	0	0	0	1.48263	0	0	31.0837	1.57095	0	0	0	0	0	143.681	0.472903	0	0.372903	1	0	0	0	0	0.923675	0	0.475032	-0.0145451	1.11e-16	0	0	0	0	0	0	1	0.100236	0	0
107415	1.04	0	0.285714	0.487	0.5282	1	32.6456	1.49167	0.648046	0	0	0	0	0	0	1.60463	0.0666667	0	79.8092	2.10605	0	0	0	0	0	149.928	0.472268	0	0.752673	0	2	0	86.0844	0	1.27754	0	0.726354	-0.557445	0.0746959	7.81747	0	1	0	0	0	0	0.0049	1	0
512561	1.3	0	0.428571	-0.69	0.0537	0.857143	28.0988	1.62473	0.452571	0	0	0	0	0	0	2.6084	0.148148	0	116.164	1.84987	0	0	0	0	0	150.585	0.452571	0	0.452571	1	0	0	114.737	0	0.800261	0	0.69143	-1.01185	1.44e-16	7.11763	0	0	0	0	0	0	0.0433472	0	0
109013	1.64	0	0	-0.533	-0.4786	0.142857	30.7435	1.50358	0.594169	0	0.111111	0	0.315789	0	0	2.26084	0.0555556	0	73.1647	1.82405	0	0	0	0	0	155.467	0.429397	1	0.668508	0	0	3.30193	41.5546	0	1.2048	0	1.46942	-0.197254	0.0114498	6.93014	0	0	1	0	0	0	0.0668222	0	0
96413	1.8	0	0	0.76	0.9213	0.166667	17.6089	1.31128	0.5625	0	0	0	0.3125	0	0	1.36384	0.0634921	0	45.3539	1.71692	0	0	0	0	0	146.913	0.429229	0	0.6875	0	5	4.24264	31.0837	0	1.19052	0	0.740281	-0.491022	0.0531282	6.71846	0	1	0	0	0	0	2.76457	2.82843	0
76039	1.91	0	0.166667	1.03	1.4412	0.833333	28.1583	0.327388	0.80188	0	0	0	0	0	0	1.46074	0.148148	0	125.161	2.40564	0	0	1	0	0	150.96	0.80188	0	0.67688	1	0	0	0	0	0.771107	0	0.491127	-0.60969	0.0547509	0	0	0	0	0	0	0	2.09786	0	0
17584122	2.12	0	0	0.633	0.83483	0.333333	31.6387	1.05424	0.719231	6	0.103333	0	0.352941	0.363636	6.71846	1.52941	0.111111	0	138.665	2.70453	0	0	0	31.0837	0	160.231	0.661666	0	0.748013	0	0	0	83.7268	1	0.839743	0	0.306523	-0.829953	0.0232586	7.33624	0	0	1	0	3	0	0.000266	0	1.65096
108941	2.2	0	0	0.92	1.5196	0	23.1792	1.25686	0.575319	0	0.111111	0	0.352941	0	0	1.33332	0.0555556	0	73.4029	1.73604	0	0	0	0	0	143.843	0.424723	0	0.683393	1	5	6.08364	41.2697	0	1.02143	0	0.490993	-0.330521	0.0114498	7.269	0	0	0	0	0	0	1.11979	3.04182	0
79209	2.32	0	0.25	0.241	0.1793	0.75	17.4128	1.52036	0.750096	0	0	0	0	0	0	2.06531	0.111111	0	103.829	2.04945	0	0	1	0	0	150.556	0.592425	0	0.750096	1	0	0	31.0837	0	0.856423	0	0.559212	-0.652532	0.0608102	6.71846	0	0	0	0	0	0	0.000445	0	0
928961	2.42	2	0.5	1.473	1.26119	0.833333	29.3173	1.41503	0.767628	0	0.0266667	0	0	0.768166	7.4399	1.46169	0.0444444	0	109.279	2.43059	0	0	0	50.7873	0	147.603	0.572184	0	0.817188	0	2	5.67624	98.5419	0	1.2979	0	0.985887	-0.436071	1.11e-16	7.19159	0.0277778	0	0	0	0	0	0.255631	0	0
99036	2.55	0	0.1	0.119	1.4714	0.3	44.0559	0.901059	0.817188	6	0.0660317	0	0.315789	0.66918	6.71846	0.951387	0.0854701	0	145.21	3.0503	0	0	0	31.0837	1	147.289	0.718068	0	0.916307	1	0	3.53278	114.9	1	0.873182	0	0	-0.501652	0.0440003	7.46829	0.03125	0	0	0	2	0	0.0589518	6.44742	1.65096
79061	2.6	1	0.25	-0.516	-0.41611	0.5	17.5136	1.04532	0.879588	0	0	0	0	0	0	1.26526	0.111111	0	78.7	2.64644	0	1	2	0	0	158.36	0.796658	0	0.879588	1	0	0	31.0837	1	0.93686	0	0.513566	-0.896931	0.0608102	6.71846	0	0	0	0	0	0	0.001156	1	0
868859	2.69	0	0.4	-0.742	-0.3111	0.8	15.5367	1.6911	0.59444	0	0	0	0	0	0	2.59069	0.133333	0	83.9044	2.19969	0	0	0	0	0	149.704	0.59444	0	0.59444	1	0	0	114.737	0	1.067	0	0.888631	-0.630948	2.22e-16	7.11763	0	0	0	0	0	0	0.0605652	0	0
16879020	2.78	0	0	0.824	1.84579	0.25	33.2156	0.684733	0.889471	6	0.0740741	0	0.5	0	0	1.18963	0.0666667	0	159.185	2.79248	0	0	2	0	0	148.201	0.778943	0	1	0	0	2.3811	95.6312	0	0.513815	0	0.533996	-0.780015	1.67e-16	8.26433	0	0	1	0	2	0	1.54306	3.30193	0.5
96800	2.86	0	0.444444	1.12	1.0975	1	45.2776	1.61166	0.581069	0	0.032	0	0	0.11633	6.71846	2.01673	0.121212	0	124.059	1.92492	0	0	0	31.0837	0	150.703	0.39624	0	0.581069	0	2	1	85.828	0	1.35381	0	0.839268	-0.384161	0.138755	7.12204	0	2	0	0	0	0	0.10208	1.63299	0.5
123115	2.93	1	0.2	0.67	2.00849	0.3	42.6731	0.99341	0.776776	6	0.0637037	0	0.333333	0.476524	7.70088	1.17016	0.0740741	0	148.897	2.81634	0	0	1	152.335	1	142.921	0.675393	0	0.883359	1	0	4.88359	105.686	0	0.744764	0.0204082	0.814482	-0.258288	5.13e-16	7.40808	0.0601852	0	0	0	2	0	0.267082	6.59754	0.333333
98953	3.01	0	0.111111	1.244	1.4538	0.222222	34.1735	0.865239	0.655469	6	0.0382222	0	0.428571	0.000116	0	0.857739	0.0808081	0	136.597	2.14883	1	0	0	0	0	148.992	0.56439	0	0.798231	1	0	6.08364	120.294	0	0.577547	0	0.381446	-0.228663	0.030857	8.85202	0.0625	0	0	0	1	0	2.61372	3.04182	0
150765	3.05	0	0.111111	0.975	1.90159	0.333333	39.2048	0.977601	0.701312	6	0.0855556	0	0.352941	0.707087	8.88278	1.14477	0.0808081	0	135.046	2.74894	0	0	0	90.1944	0	145.755	0.67253	0	0.787659	0	0	3.30193	94.4464	0	0.845368	0	0.737393	-0.450549	0.0568238	7.24455	0.0590278	0	0	0	2	0	0.116759	5.65685	0.333333
95534	3.12	0	0	0.716	2.45982	0.25	38.7876	0.944445	0.758877	6	0.111111	0	0.352941	0	0	0.949868	0.111111	0	108.194	2.74894	0	0	0	0	1	148.139	0.67253	0	0.874007	0	0	3.96541	54.3254	1	1.03698	0	0.5799	-0.545311	1.11e-16	6.88327	0	0	0	0	2	0	0.42654	4.29828	1
110930	3.17	1	0.375	1.796	2.24799	0.75	39.8741	1.3745	0.629675	0	0.032	0	0	0.829872	7.90214	1.43749	0.0740741	0	102.938	2.13832	0	0	0	103.829	1	144.755	0.472707	0	0.747557	1	2	2.3811	103.273	0	1.16882	0	0.522237	-0.270287	2.22e-16	7.10016	0.0555556	0	0	0	0	0	2.53669	3.30193	0.25
150196	3.23	0	0.111111	0.975	1.90159	0.333333	39.2048	0.977601	0.787659	6	0.0684444	0	0.352941	0.806827	6.71846	1.14477	0.0606061	0	138.255	2.74894	0	0	0	31.0837	0	145.755	0.67253	0	0.874007	0	0	3.53278	101.85	0	0.845368	0	0.734751	-0.436734	0.0799914	7.46079	0.03125	0	0	0	2	0	0.116759	5.11154	0.5
763699	3.29	0	0.666667	0.727	0.9761	0.888889	37.1532	1.5172	0.681754	0	0.0228571	0	0	0.751594	8.05252	1.91871	0.0740741	0	147.933	2.08255	0	0	1	106.219	0	148.592	0.454213	0	0.786351	1	1	2.18225	112.427	0	0.984112	0.0102041	0.671975	-0.438601	0.0701447	7.40886	0.0222222	0	0	0	0	0	0.256644	2	0
121448	3.37	0	0.5	1.332	1.3481	1	32.8695	1.73218	0.454182	0	0	0	0	0	0	2.20512	0.111111	0	113.015	1.36338	0	0	0	0	0	150.866	0.30573	0	0.454182	0	0	1.5	58.968	0	1.49448	0	1.13675	-0.070925	2.78e-16	6.85152	0	0	0	0	0	0	1.14768	0	0
5395755	3.4	0	0.714286	2.998	2.4926	1	44.9924	1.21625	0.515738	0	0.02	2	0	1.0702	7.03938	1.15076	0.037037	0	138.881	1.49111	0	0	0	113.015	0	142.416	0.334373	0	0.597281	0	0	2.52506	101.158	0	0.865188	0.0204082	1.26399	-0.0827443	3.33e-16	7.0266	0.0185185	0	0	0	0	0	3.64734	0	0
99990	3.44	0	0.1	1.636	1.48182	0.3	38.4555	0.945278	0.758877	6	0.0637037	0	0.352941	0.872369	9.47117	0.945804	0.102564	0	127.592	2.86659	1	0	0	82.0136	1	148.172	0.701312	0	0.845224	1	0	3.30193	102.634	0	0.653538	0	0.335571	-0.220317	0.0154558	7.8791	0.0787037	0	0	0	2	0	4.25638	5.65685	0.333333
79016	3.47	1	0	2.642	2.42789	0.75	25.2622	0.533297	0.871049	0	0	0	0	0	0	1.43954	0.111111	0	0	1.79248	0	0	2	0	0	143.595	0.693426	0	0.537716	0	0	0	0	0	0.747855	0	1.08569	-0.39356	0.0608102	0	0	0	0	0	0	0	3.03735	1	0
108054	3.52	1	0.4	0.694	0.61919	0.6	21.105	1.30608	0.842981	0	0	0	0	0	0	1.68981	0.0888889	0	166.298	2.79248	0	1	3	0	0	148.396	0.778943	0	0.842981	1	0	0	83.0962	0	0.810644	0	0.536431	-0.692941	0.0761289	7.46859	0	0	0	0	0	0	0.0110881	0.5	0
504609	3.56	3	0.25	2.48	1.60088	0.5	26.1983	1.3	0.818007	0	0	0	0	0	0	1.3	0.0740741	0	100.941	2.28778	0	1	1	0	0	144.346	0.618246	0	0.818007	0	0	2.3811	72.9102	0	1.3	0	0.955882	-0.145196	1.11e-16	6.91805	0	0	0	0	0	0	2.60758	0	0
4460860	3.6	1	0.285714	1.15	2.02569	0.5	55.9601	1.13533	0.656013	6	0.0602469	0	0.230769	0.948996	7.71554	1.48729	0.0987654	0	193.341	2.79471	0	0	1	90.4467	1	146.094	0.594564	0	0.711286	1	0	1.14471	141.144	0	0.753397	0.0136054	0.959374	-0.24605	5.55e-16	7.88257	0.0393519	0	0	0	4	0	0.230784	7.30837	3.30193
502567	3.66	0	0.666667	2.967	2.9359	0.888889	37.8882	1.49452	0.587613	0	0.0342857	0	0	1.01936	6.91937	1.55554	0.0740741	0	110.9	1.69812	0	0	0	85.4173	0	145.33	0.353233	0	0.647045	1	6	6.12046	110.719	0	1.29118	0.0136054	0.545759	-0.335678	2.5e-16	7.30419	0.00925926	0	0	0	0	0	1.54654	3.30193	0
107755	3.7	1	0.545455	2.483	2.1527	0.909091	47.5262	1.44491	0.699756	0	0.0266667	0	0	0.835845	7.55231	1.52737	0.0793651	0	93.5756	2.35724	0	0	1	114.995	0	146.527	0.471447	0	0.810846	1	4	4.5088	101.658	0	1.22041	0.0153061	0.601166	-0.432473	0.0576206	7.29223	0.047619	1	0	0	0	0	0.110756	3.04182	0
95523	3.75	0	0	1.324	1.85372	0.25	35.3656	0.964608	0.714097	6	0.111111	0	0.4	0	0	0.839049	0.111111	0	108.355	2.52323	0	0	0	0	1	143.707	0.645841	0	0.850608	0	0	3.96541	62.5597	0	0.734696	0	0.575301	-0.413441	5.55e-17	7.15565	0	0	0	0	2	0	3.09619	4.29828	1
65337135	3.78	0	0	0.295	0.07999	0.5	19.6254	1.13207	0.875048	0	0	0	0	0	0	1.17904	0.111111	0	78.0032	2.73216	0	0	0	0	0	148.452	0.789771	0	0.875048	0	1	0	31.0837	0	1.07764	0	0.831157	-0.602886	0.0608102	6.71846	0	1	0	0	0	0	0.0933303	1	0
108907	3.82	0	0	1.604	2.34	0.142857	35.672	0.757488	0.497679	6	0.111111	0	0.5	0	0	0.906727	0.0555556	0	117.528	1.65002	0	0	0	0	0	139.367	0.460262	0	0.610529	0	0	6.08364	62.4429	0	0.493869	0	1.19361	-0.34062	0.0114498	7.48138	0	0	0	0	1	0	3.14034	3.04182	0
108418	3.84	0	0	1.996	2.36802	0.25	39.954	0.847256	0.748225	6	0.0740741	0	0.4	0	0	0.99043	0.0666667	0	125.605	2.52323	0	0	0	0	1	140.363	0.645841	0	0.918863	0	0	3.53278	90.3272	0	0.540764	0	0.787176	-0.327526	3.89e-16	7.61443	0	0	0	0	2	0	4.92174	5.11154	0.5
57147	3.88	0	0	-1.385	-0.5783	1	19.5755	1.80983	0.54649	0	0	0	0	0	0	2.32719	0	0	31.0837	1.95915	0	0	0	0	0	168.416	0.54649	0	0.463157	0	0	0	0	1	1.38167	0	0.54321	-0.0373562	0	0	0	0	0	0	0	0	0.142657	0	0
613456	3.92	1	0.25	0.91	2.01709	0.416667	49.3166	1.07394	0.752673	6	0.0577778	0	0.272727	0.474764	7.2404	1.34845	0.0888889	0	177.481	2.90195	0	0	1	110.239	1	144.796	0.650744	0	0.821525	1	0	2.74946	125.847	0	0.749804	0.0136054	0.890738	-0.237748	0.0394971	7.54928	0.0426587	0	0	0	3	0	0.000331	7.30837	1.65096
464482	3.95	0	0	2.127	2.4017	0.25	43.7625	1.20918	0.684307	0	0.037037	0	0.259259	0	0	1.25356	0.179894	0	96.5541	2.13434	0	0	0	0	0	142.787	0.448872	0	0.779839	1	3	1.65096	36.1139	0	1.05866	0	0.458081	-0.358555	0.0569306	6.99034	0	1	0	0	0	0	0.939542	3.96541	0.5
6575093	4	0	0	1.637	2.2397	0.2	44.9325	0.772405	0.82016	6	0.0466667	0	0.375	0.0688308	0	0.912699	0.119658	0	180.528	3.10846	0	0	0	0	2	140.173	0.777115	0	0.925705	0	0	2.94168	106.857	0	0.509751	0	0.368148	-0.270041	0.0875308	7.88541	0.0625	0	0	0	3	0	4.23372	6.44742	2.3811
120809	4.08	0	0	1.083	1.0978	0.25	34.1668	0.77589	0.662308	6	0.111111	0	0.428571	0	0	0.81364	0.111111	0	106.988	2.23593	0	0	0	0	0	146.451	0.587265	0	0.73735	0	0	3.96541	58.0003	0	0.866129	0	0.663542	-0.576242	5.55e-17	7.34884	0	0	0	0	2	0	0.0768398	4.29828	1
93890	4.14	0	0.272727	1.726	1.8633	0.363636	46.0179	1.04415	0.727669	6	0.0212346	0	0.285714	1.18026	6.95541	1.20498	0.0854701	0	167.773	2.7338	0	0	1	90.7481	1	143.124	0.622404	0	0.831852	1	0	6.40993	163.326	0	0.802696	0.0201361	0.568563	-0.592386	0.109408	8.04565	0.025463	0	0	0	1	0	2.15914	5.55316	1
149304	4.19	0	0	1.016	2.99019	0.0909091	52.296	0.710281	0.829361	9	0.0428704	0	0.6	1.32382	6.71846	0.874699	0.0592593	0	205.132	2.84022	0	0	0	31.0837	0	136.964	0.726978	0	0.965872	0	0	3.96541	181.006	0	0.830732	0	1.21741	-0.649255	0.00338666	7.5183	0.04	0	0	0	1	0	4.68506	5.24148	1.88988
387451	4.23	1	0.1	1.123	2.25999	0.3	40.8736	0.732525	0.873274	6	0.0466667	0	0.428571	3.05e-05	0	0.774892	0.119658	0	191.12	2.89629	0	0	1	0	1	142.543	0.76071	0	0.962479	1	0	2.94168	106.416	0	0.467084	0	0.714479	-0.217531	0.0875308	8.44707	0.0625	0	0	0	3	0	1.67418	6.44742	2.3811
3923522	4.27	0	0.117647	2.075	2.06149	0.176471	72.1032	0.804341	0.563696	12	0.0226263	0	0.464286	1.07553	7.01508	0.80221	0.10628	0	200.318	2.36312	0	0	0	116.42	2	139.71	0.491564	0	0.706478	0	0	16.6515	187.404	0	0.82884	0.0158367	0.780897	-0.513774	1.67e-16	7.4196	0.0177469	0	0	0	2	0	5.93069	9.06132	0.5
610413	4.33	0	0.153846	0.758	0.8032	0.384615	40.941	0.723131	0.740073	6	0.0658333	0	0.333333	0.102233	9.47117	0.888173	0.0987654	0	171.681	2.933	2	0	0	82.0136	0	161.005	0.70337	0	0.866771	2	0	1.65096	154.177	1	0.555109	0	0.420734	-0.297167	0.0208267	9.7256	0.0328283	0	0	0	3	0	0.401069	5.8538	1.65096
5372816	4.37	0	0.266667	0.461	0.81039	0.466667	56.0422	0.985955	0.735993	6	0.0451852	0	0.230769	1.0536	7.84508	1.25841	0.122222	0	178.721	3.27661	0	0	2	104.926	2	148.902	0.697086	0	0.791265	2	0	1.65096	161.973	1	0.741066	0.0347522	0.614252	-0.613254	0.0264992	8.18514	0.0393519	0	0	0.00617284	3	0	0.0262764	8.09801	4.5088
143088	4.4	0	0.777778	3.696	2.7293	1	33.5567	1.55122	0.513151	0	0.0133333	0	0	0.911122	7.13009	1.58736	0.0277778	0	99.4269	1.56149	0	0	0	90.8148	0	146.973	0.318223	0	0.636675	0	7	11.2406	97.4627	0	1.44207	0.0102041	0.860381	-0.42836	1.17e-15	7.08497	0.0111111	0	0	0.0123457	0	0	5.8245	0	0
2243278	4.42	0	0.666667	3.698	3.26058	0.777778	34.1161	1.42957	0.534402	0	0.0133333	0	0	0.897097	7.09206	1.47645	0.0277778	0	106.31	1.60686	0	0	0	101.308	0	145.427	0.337939	0	0.651393	0	7	11.2406	105.268	0	1.29895	0.0102041	0.361282	-0.235549	5e-16	7.05274	0.0111111	0	0	0.0123457	0	0	2.58309	0	0
298000	4.47	0	0.3125	2.514	2.52129	0.5	63.8942	1.00272	0.74217	6	0.0436601	0	0.230769	0.978983	7.45002	1.27757	0.10101	0	187.999	3.33468	1	0	0	131.843	0	148.023	0.70944	0	0.80763	1	0	3.30193	197.201	0	0.476152	0.0283265	0.539055	-0.702855	0.0478274	8.20417	0.0272817	0	0	0.0123457	2	0	4.73019	5.65685	0.333333
1570656	4.54	0	0	2.07	3.15232	0.4	46.2757	0.680486	0.863205	6	0.0749206	0	0.375	0.0379029	0	0.922125	0.111111	0	178.567	3.20282	0	0	0	0	1	142.734	0.800705	0	0.925705	0	0	0.5	107.526	0	0.499033	0	0.585296	-0.549365	0.0319804	8.05158	0	0	0	0	4	0	4.09698	5.11154	3.53278
104552	4.59	3	0.2	1.968	1.71599	0.2	46.2731	0.90776	0.611487	6	0.0251852	0	0.333333	0.94666	7.92086	0.944438	0.040404	0	154.508	1.74484	0	0	1	98.6852	1	139.971	0.418435	0	0.846656	1	0	11.4675	152.851	0	0.785127	0.0201361	0.723404	-0.197133	0.162869	7.34173	0.0180556	0	0	0	1	0	1.89475	4.68731	0
101848	4.63	0	0.142857	2.163	3.97969	0.142857	62.1861	0.865384	0.435525	12	0.0302222	0	0.565217	1.14824	7.064	0.959549	0.0261438	0	171.573	1.54797	0	0	0	134.947	0	139.977	0.342202	0	0.620251	0	0	13.9953	210.728	0	0.771993	0.00979592	0.917705	-0.381921	6.11e-16	7.37975	0.00138889	0	0	0	2	0	3.09443	8.07939	0.5
80057	4.69	0	0.111111	3.092	3.191	0.333333	76.3071	0.911192	0.606465	12	0.0422222	0	0.393939	0.978683	7.95254	0.920477	0.119658	0	161.845	2.81683	0	0	0	134.85	2	142.632	0.558407	0	0.702581	0	0	8.6919	136.247	0	0.920234	0.0172595	0	-0.535545	3.76e-16	7.10678	0.0373264	0	0	0.00987654	4	0	4.85585	12.362	1.53262
88963397	4.73	0	0	2.055	3.229	0.4	48.6542	0.466055	0.746547	6	0.0874074	0	0.428571	0	0	0.792648	0.142857	0	210.633	2.69951	0	0	0	0	0	147.429	0.709026	0	0.924957	0	0	1	139.785	1	0.498457	0	0.656272	-0.543975	7.49e-16	8.3387	0	0	0	0	4	0	1.72344	4.29828	3.96541
120821	4.78	0	0	2.547	3.6468	0.333333	45.1044	0.564898	0.592981	6	0.103333	0	0.5	0	0	0.895412	0.111111	0	230.491	2	0	0	0	0	0	138.183	0.557886	0	0.721057	0	0	1.65096	220.072	0	0.486382	0	1.13399	-0.410396	0.0232586	9.2671	0	0	0	0	3	0	6.29759	5.8538	1.65096
122145	4.81	0	0.294118	2.695	2.66512	0.529412	68.1762	1.03324	0.794014	6	0.0406349	0	0.206897	1.07621	7.75948	1.29432	0.101852	0	185.478	3.40836	1	0	0	139.381	1	147.643	0.701599	0	0.827765	1	0	1.65096	172.978	0	0.497024	0.0280691	0	-0.701515	0.0106022	8.2855	0.0365741	0	0	0.0123457	3	0	6.87121	5.8538	1.65096
4170303	4.86	3	0.25	0.817	0.68759	0.5	22.2699	1.26105	0.822491	0	0	0	0	0	0	1.37498	0.0740741	0	96.8025	2.59491	0	0	1	0	0	145.246	0.750096	0	0.875048	1	0	2.3811	56.5487	0	0.945588	0	0.744118	-0.272852	1.11e-16	8.09482	0	0	0	0	0	0	0.369907	0	0
2138229	4.96	0	0	1.66	1.7512	0.333333	38.883	0.621502	0.798231	6	0.103333	0	0.428571	0.072121	0	0.788003	0.111111	0	141.466	2.69951	0	0	0	0	0	145.943	0.709026	0	0.887436	0	0	1.65096	92.2301	0	0.564334	0	0.652234	-0.581894	0.0232586	7.90036	0	0	0	0	3	0	0.417187	5.8538	1.65096
3066715	5.02	1	0.272727	2.361	1.97449	0.272727	34.3197	1.24707	0.638454	0	0.0388889	0	0.24	1.17925	7.13071	1.41787	0.0512821	0	117.335	2.46713	0	1	2	85.4866	0	144.724	0.531266	0	0.745817	1	6	6.40993	136.449	0	0.957798	0.025102	0	-0.676003	0.0779666	7.5954	0.0168651	1	0	0	0	0	0.961772	5.14492	0.5
514103	5.1	2	0.0833333	6.113	5.05858	0.291667	90.3137	1.15973	0.726676	0	0.0531111	0	0.269231	0.762693	7.19551	1.18944	0.128655	0	146.459	2.80848	0	0	1	118.56	2	142.998	0.492678	0	0.854871	1	6	9.12534	118.539	0	1.0663	0.0298604	0.301943	-0.602805	0.181353	7.19793	0.0375958	3	0	0.021472	0	0	1.89696	16.7051	4.77054
2016571	5.18	0	0.8	4.198	3.0858	1	38.1258	1.54971	0.489722	0	0.0114286	0	0	0.933227	7.01696	1.56254	0.0246914	0	99.6675	1.60986	0	0	0	93.2091	0	148.959	0.316436	0	0.603817	0	8	13.1851	98.0763	1	1.54332	0.00816326	0.92475	-0.458805	1.11e-16	7.0092	0.00925926	0	0	0.00823045	0	0	8.94608	0	0
330938	5.26	0	0.125	1.973	4.25789	0.25	62.4417	0.835671	0.557871	12	0.057037	0	0.565217	0.78044	7.61633	0.780842	0.0634921	0	185.2	2.17574	0	0	0	157.674	0	143.565	0.480978	0	0.673209	0	0	8.6919	218.85	0	0.57933	0.0241633	0.600274	-0.486045	1.61e-15	7.74724	0.0104167	0	0	0.00987654	4	0	2.49229	12.362	1.53262
3428248	5.3	0	0	2.237	2.4046	0.4	43.5992	0.498126	0.73735	6	0.100741	0	0.428571	0.152294	0	0.762227	0.126984	0	175.944	2.80735	0	0	0	0	0	145.436	0.73735	0	0.73735	0	0	0.333333	126.46	0	0.526633	0	0.644675	-0.545301	3.89e-16	8.45188	0	0	0	0	4	0	1.02941	5.65685	3.30193
143168	5.38	0	0.833333	4.8	3.7366	1	47.8146	1.58085	0.513758	0	0.00888889	0	0	0.962456	7.06811	1.70988	0.020202	0.00550964	101.642	1.56664	0	0	0	99.724	0	148.054	0.294375	1	0.626499	0	8	13.4067	100.547	0	1.51688	0.0058309	1.34109	-0.271405	7.22e-16	7.05241	0.00694444	0	0	0.00493827	0	0	6.75272	0	0
79958	5.44	0	0.0909091	4.978	5.8046	0.454545	95.1719	0.670633	0.654523	12	0.0642963	0	0.393939	1.01441	8.77227	0.892088	0.130719	0	205.932	3.30167	0	0	0	211.604	2	141.796	0.654523	0	0.702581	0	0	1.88988	184.582	0	0.500871	0.0184045	0.551791	-0.506946	3.24e-16	7.51371	0.0372024	0	0	0.0176754	8	0	13.5306	11.9187	8.66442
3252435	5.56	0	0	1.358	1.62588	0.5	27.232	0.517661	0.871049	0	0	0	0	0	0	0.905679	0.111111	0	0	2.25163	0	0	0	0	0	141.926	0.871049	0	0.537716	0	0	0	0	0	0.700957	0	0.521312	-0.228016	0.0608102	0	0	1	0	0	0	0	2.76457	1	0
1962750	5.67	0	0.5	3.224	3.6004	0.6	73.9672	1.19119	0.648928	6	0.0282828	0	0.142857	1.29348	7.64187	1.38119	0.0925926	0.00619835	149.385	2.74806	0	0	2	150.531	2	144.378	0.509626	0	0.701914	2	4	10.1442	162.37	0	0.891934	0.0157823	0.514522	-0.621935	6.94e-17	7.95947	0.0277778	0	0	0.0116318	2	0	0.0384944	11.8791	2.40685
128370	5.78	0	0.125	4.46	4.38581	0.625	72.6567	1.23578	0.514634	6	0.0608	0	0.15	1.50651	6.88556	1.24803	0.111111	0	126.749	2.35934	0	0	0	66.1012	3	144.057	0.443325	0	0.524029	0	0	0.5	146.124	0	1.19861	0	0.41748	-0.561085	6.66e-16	7.52221	0.0460526	0	0	0	4	0	16.0633	5.11154	3.53278
3481207	5.93	0	0	2.632	3.8824	0.454545	53.3704	0.368887	0.73735	6	0.0795062	0	0.428571	0	0	0.76983	0.138889	0	260.097	2.52164	0	0	0	0	0	146.922	0.662308	0	0.812393	0	0	0	202.781	1	0.540938	0	0.611207	-0.466839	1.05e-16	9.18824	0	0	0	0	5	0	2.82744	3.04182	6.08364
87865	6.04	0	0	3.62	4.6592	0.5	56.1423	0.234153	0.618246	6	0.0755556	0	0.461538	0.196805	0	0.765998	0.148148	0	360.554	1.91434	0	0	0	0	0	140.722	0.517328	0	0.776432	0	0	0	283.873	0	0.707086	0	0.634988	-0.299093	1.67e-16	10.3302	0	0	0	0	6	0	7.20278	0	9.12547
133062	6.18	2	0.117647	2.268	1.71089	0.294118	68.1818	0.747467	0.75686	0	0.0482011	1	0.375	0.928747	8.97879	1.34565	0.0854701	0	196.067	3.2406	0	0	2	225.169	0	143.145	0.706789	0	0.75686	2	2	3.96541	226.69	0	0.510739	0.0236678	0.520302	-0.545666	0.124565	8.94132	0.0370679	2	0	0	0	0	10.462	6.87157	4.24264
106514	6.38	4	0	-0.228	0.10298	0	31.0288	0.822289	0.535095	0	0.151111	0	0.5	0	0	0.916652	0.0888889	0	121.219	1.9183	0	0	0	0	0	139.995	0.535095	0	0.535095	2	0	3.30193	92.8528	0	0.579942	0	0.625952	-0.45633	2.22e-16	8.92955	0	0	0	0	0	0	0.000353	5.65685	0.333333
1861401	6.53	0	0.347826	4.437	3.5251	0.652174	71.256	1.14068	0.765854	6	0.0547425	0	0.153846	0.657583	8.04227	1.13408	0.0942761	0	186.191	3.26456	2	0	0	126.482	1	154.955	0.617656	0	0.853177	2	2	4.85782	182.301	0	0.60573	0.0133835	0.315774	-0.43254	0.157129	8.35173	0.0483025	0	0	0.00787352	4	0	4.57318	8.54066	3.53278
1770805	6.7	0	0.357143	4.627	5.67709	0.642857	102.788	0.876607	0.710763	0	0.0624401	0	0.148936	1.26751	8.15054	1.39174	0.146465	0.00275482	220.264	2.99207	0	0	2	192.502	0	143.486	0.538666	0	0.741407	2	5	3.67785	217.579	0	0.489055	0.0234492	0.487612	-0.319658	1.89e-15	8.91664	0.0330676	2	0	0.0160355	0	0	2.93642	7.36125	7.18624
70304	7.29	0	0.0909091	4.575	6.8467	0.454545	95.5806	0.47257	0.723405	12	0.061037	0	0.481481	0.98359	9.40678	0.773798	0.121212	0	266.46	3.0875	0	0	0	321.904	2	140.742	0.649331	0	0.797479	0	1	0.595275	257.614	0	0.520458	0.0234402	0.599947	-0.465861	5.55e-17	8.51895	0.0261752	0	0	0.0090703	10	0	15.6642	10.9242	16.1332
83794	7.85	0	0.0909091	1.867	4.63107	0.181818	114.149	0.953085	0.853904	12	0.0566461	0	0.411765	1.11555	7.79236	1.19024	0.08	0.00979492	201.998	3.42284	0	1	1	158.784	4	142.635	0.603417	0	0.895384	1	3	3.40473	181.517	0	0.706618	0.0236378	0.837654	-0.277889	0.0219427	7.77292	0.02763	3	2	0.0121311	8	0	0.0192377	22.8616	22.5131
100970	0.45	0	0	-0.186	-1.0198	0	36.9954	1.33481	0.321873	0	0	0	0.454545	0	0	2.69797	0	0	64.6634	1.43537	0	0	0	0	0	158.39	0.321873	0	0.321873	0	0	6.52913	114.737	0	0.853464	0	1.60417	-0.368389	1.99e-16	7.11763	0	0	0	0	0	0	0.00736164	0	0
4839467	1.06	0	0.4	0.762	0.962	0.8	37.1617	1.23085	0.658697	0	0.0123077	0	0	0.20449	9.47117	1.43833	0.0793651	0	102.722	2.55751	0	0	2	82.0136	0	148.897	0.565374	0	0.658697	2	2	0.5	107.709	0	0.926225	0	0.328933	-0.747535	1.53e-16	9.18854	0.0555556	0	0	0	0	0	0.254218	2.3094	0.25
103764	1.31	0	0.222222	-1.242	-1.1161	0.333333	37.0358	1.43104	0.623043	0	0.0302222	0	0.26087	0.309261	7.2576	2.13458	0.0444444	0	101.603	2.14838	0	0	0	44.4353	0	155.318	0.474931	1	0.769324	0	0	6.67872	78.1038	0	1.13778	0.04	0.940473	-0.343508	0.132149	7.33677	0.0300926	0	1	0	0	0	0.636644	0	0
109079	1.65	0	0	-0.312	-0.4323	0.142857	30.0332	1.42037	0.699362	0	0.111111	0	0.315789	0	0	1.95882	0.0555556	0	73.9943	2.03876	0	0	0	0	0	155.87	0.479942	2	0.792408	0	1	1.65096	51.0011	0	1.23961	0	1.32957	-0.375698	0.0114498	6.8135	0	1	1	0	0	0	0.648186	1.65096	0
7209383	1.81	0	0.428571	-1.13	-0.6984	0.571429	57.761	1.45983	0.508578	0	0.0318519	0	0.157895	1.0974	7.2191	2.01323	0.0555556	0.00826446	110.618	1.97323	0	0	0	83.4141	0	155.87	0.376001	0	0.628926	0	2	14.3452	100.03	2	1.27404	0.0202041	0.982082	-0.339221	1.33e-15	7.13948	0.0214646	0	1	0.00617284	0	0	3.82828	0	0
105602	1.91	0	0	0.404	0.6766	0	25.4377	1.27176	0.758275	0	0.0625	0	0.368421	0	0	1.58407	0.0493827	0	87.3631	2.24929	0	0	1	0	0	149.658	0.529502	1	0.876101	1	4	5.84191	41.2697	0	1.01504	0	0.461175	-0.637195	0.00469608	7.269	0	0	0	0	0	0	2.10947	2.4418	0
55185	2.12	0	0.5	0.571	1.0096	0.833333	28.6381	1.60538	0.604101	0	0	0	0	0	0	1.89108	0.111111	0	116.686	1.89809	0	0	0	0	0	157.581	0.46437	0	0.604101	1	0	0.5	64.7294	0	0.982902	0	0.3181	-0.357336	2.78e-16	7.50643	0	0	0	0	0	0	0.349991	0	0
30899195	2.21	0	0.5	3.185	2.1965	1	20.5322	1.7	0.496026	0	0	0	0	0	0	1.7	0.0740741	0	76.6009	1.15955	0	0	0	0	0	146.541	0.283686	0	0.517754	0	3	2.3811	58.968	0	1.7	0	1.05121	-0.189016	2.22e-16	6.85152	0	0	0	0	0	0	0.57973	0	0
107222	2.33	2	0.333333	-0.526	-0.6158	0.333333	12.5614	1.1351	0.613147	0	0	0	0	0	0	1.49995	0.111111	0	0	1.58496	0	0	2	0	0	147.945	0.613147	0	0.408765	2	0	1	0	0	0.568026	0	0	-0.150015	1.11e-16	0	0	0	0	0	0	0	0.54199	0	0
13952846	2.43	0	0.25	0.675	0.7436	1	22.329	1.62153	0.69516	0	0	0	0	0	0	1.68359	0.111111	0	58.9794	1.96692	0	0	0	0	0	154.495	0.491729	0	0.78891	0	2	0	31.0837	1	1.59024	0	0.743665	-0.60777	0.0608102	6.71846	0	1	0	0	0	0	0.971604	1	0
540885	2.55	0	0.285714	1.541	1.348	0.857143	31.2166	1.50595	0.559929	0	0	0	0	0	0	1.78739	0.0666667	0	97.6631	1.93321	0	0	1	0	0	147.615	0.447302	0	0.559929	1	0	0	103.829	0	1.04922	0	0.35758	-0.745521	0.0746959	7.90214	0	0	0	0	0	0	0.907066	0	0
693210	2.6	0	0.666667	0.506	-0.8624	0.833333	30.9483	1.39216	0.609708	0	0.0266667	0	0	1.17935	9.57567	1.68637	0.0512821	0	143.788	2.48756	2	0	0	148.545	0	163.975	0.566342	0	0.69644	2	0	2.94168	118.901	0	0.562951	0.0174927	0.336738	-0.486267	4.44e-16	8.96526	0.0208333	0	0	0.00987654	0	0	1.6315	0	0
497370	2.69	0	0	1.225	1.1673	0.111111	29.7889	1.16469	0.676071	0	0.111111	0	0.35	0	0	1.19322	0.0683761	0	60.08	1.91924	0	0	0	0	0	144.63	0.44407	0	0.79176	0	5	3.14735	44.3346	0	1.0962	0	0.681255	-0.455669	0.0823287	7.14022	0	3	0	0	0	0	0.0862597	8.20336	1.88988
79118	2.81	0	0.25	0.157	0.3098	0.75	17.3969	0.81623	0.916667	0	0	0	0	0	0	1.5875	0.111111	0	62.4429	2.75	0	0	1	0	0	152.99	0.916667	0	0.791667	1	0	0	0	0	0.555071	0	0.440568	-0.661679	0.0608102	0	0	0	0	0	0	0	0.0916273	1	0
98862	2.87	0	0.111111	1.244	1.8892	0.222222	40.5061	0.956513	0.667284	6	0.0382222	0	0.352941	0.685592	6.71846	0.999992	0.0808081	0	149.439	2.44192	0	0	0	31.0837	1	140.746	0.597418	0	0.805578	1	0	6.08364	103.408	0	0.814144	0	0.586741	-0.331753	0.030857	7.34872	0.0625	0	0	0	1	0	0.909925	4.7451	1
34723825	2.94	0	0.125	2.024	1.9504	0.25	31.7753	1.09757	0.758275	0	0.0503704	0	0.315789	0.418009	0	1.48294	0.0493827	0	110.35	1.99484	0	0	0	0	0	145.16	0.469603	0	0.851321	0	4	5.08568	88.3214	0	0.485308	0	1.39309	-0.205753	0.0775576	7.16274	0.0625	1	1	0	0	0	0.0244923	3.04182	0
70699	3.01	0	0.181818	0.372	1.8615	0.363636	49.0794	0.966261	0.788447	6	0.0477778	0	0.272727	1.02115	7.51061	1.01106	0.111111	0	149.864	3.11354	0	0	0	88.6972	1	146.888	0.698192	0	0.869991	1	1	4.25141	127.422	1	0.921134	0.0269388	0.578787	-0.510248	0.0336407	7.31622	0.0527778	0	0	0	2	0	0.0277556	8.42164	1.31037
62533	3.08	0	0	0.535	1.2688	0.142857	34.5056	0.852193	0.617948	6	0.111111	0	0.428571	0	0	0.862274	0.0555556	0	88.8121	2.00598	0	0	0	0	0	148.951	0.526869	0	0.76071	0	0	6.08364	55.8824	1	0.978655	0	0.613636	-0.534611	0.0114498	6.98054	0	0	0	0	1	0	0.0427249	3.04182	0
22367766	3.13	0	0.25	-0.231	1.18069	0.416667	48.1973	0.91933	0.80777	6	0.0469136	0	0.26087	1.07283	8.07679	0.98863	0.0888889	0	143.202	3.30617	0	0	1	104.88	1	148.563	0.730878	0	0.923108	1	2	6.63198	128.484	1	0.901592	0.0117784	0.483024	-0.646944	0.159676	7.47755	0.0390625	0	0	0	2	0	0.0114704	8.02312	1.31037
107073	3.18	0	0.333333	0.266	0.2175	1	17.6046	1.08766	0.859793	0	0	0	0	0	0	1.84433	0.111111	0	62.4429	2.28104	0	0	0	0	0	152.979	0.719587	0	0.748682	0	0	1	0	0	0.586658	0	0	-0.451901	2.22e-16	0	0	0	0	0	0	0	0.0943718	0	0
67663	3.23	0	0	2.074	1.9864	1	21.3642	0.540495	0.390436	0	0	0	0	0	0	2.30628	0	0	0	1.37095	0	0	0	0	0	147.795	0.590436	0	0	0	0	0	0	0	0.830158	0	1.27108	-0.687104	0	0	0	1	0	0	0	0	2.61534	0	0
108394	3.29	0	0	1.338	1.42022	0.25	36.8433	0.939889	0.800705	6	0.0740741	0	0.375	0	0	0.952603	0.0666667	0	105.16	2.70282	0	0	0	0	1	143.622	0.675705	0	0.925705	0	0	3.53278	78.1262	0	0.939216	0	0.521993	-0.523857	3.89e-16	7.61219	0	0	0	0	2	0	1.6556	5.11154	0.5
945517	3.37	0	0.133333	0.108	3.15209	0.133333	69.7322	0.817201	0.466289	12	0.0273016	0	0.541667	1.00093	7.064	0.871072	0.0701754	0	189.372	1.73336	0	0	0	134.947	0	137.086	0.378052	0	0.640948	1	0	13.9953	204.184	0	0.7917	0.00979592	0.705574	-0.200577	4.16e-16	7.67565	0.0115741	0	0	0	2	1	1.93766	8.07939	0.5
924414	3.41	2	0.5	1.203	0.96178	0.666667	30.7087	1.25264	0.798523	0	0.0266667	0	0	0.822974	6.71846	1.28807	0.111111	0	104.514	2.66013	0	2	2	31.0837	0	146.913	0.650802	0	0.856088	0	2	1.65096	85.0769	0	1.17699	0	0.978217	-0.520855	0.0590165	7.17455	0	1	0	0	0	0	1.34537	2.3811	0
107153	3.44	0	0.333333	-1.342	-1.0962	1	17.8686	1.52804	0.535095	0	0	0	0	0	0	1.94549	0.111111	0	49.7112	1.9183	0	0	0	0	0	168.833	0.535095	0	0.535095	0	0	1	31.0837	2	1.50513	0	1.07033	-0.61665	2.22e-16	6.71846	0	0	0	0	0	0	2.18035	0	0
108441	3.47	0	0	0.927	1.29682	0.25	38.7876	0.944445	0.787659	6	0.0740741	0	0.352941	0	0	0.949868	0.0666667	0	102.426	2.74894	0	0	0	0	1	148.139	0.67253	0	0.902789	0	0	3.53278	80.6811	1	1.03698	0	0.492241	-0.534161	6.66e-16	7.24262	0	0	0	0	2	0	0.42654	5.11154	0.5
4798441	3.52	1	0.5	1.569	1.25959	0.833333	27.8316	1.41503	0.817188	0	0.0266667	0	0	0.729816	6.71846	1.46169	0.111111	0	98.1614	2.62925	0	1	1	31.0837	0	147.603	0.618949	0	0.866748	0	3	1.65096	81.0106	0	1.2979	0	0.848922	-0.543303	0.0590165	7.20587	0	1	0	0	0	0	0.107518	2.3811	0
100027	3.57	0	0.1	0.952	1.52999	0.3	35.779	0.78817	0.795234	6	0.0637037	0	0.4	0.09139	9.47117	0.831439	0.102564	0	138.059	2.84022	1	0	0	82.0136	0	151.42	0.726978	0	0.897617	1	0	3.30193	116.837	0	0.63131	0	0	-0.508114	0.0154558	8.63457	0.0787037	0	0	0	2	0	1.11007	5.65685	0.333333
106478	3.61	0	0	0.901	1.9222	0.25	39.2218	0.690649	0.73735	6	0.151111	0	0.428571	0.125429	0	0.838704	0.0888889	0	115.583	2.52164	0	0	0	0	0	148.444	0.662308	0	0.812393	0	0	3.30193	85.128	1	0.549565	0	0.572819	-0.607099	1.11e-16	7.29391	0	0	0	0	2	0	0.331085	5.65685	0.333333
33693048	3.66	0	0.3125	0.624	2.33278	0.625	59.537	1.3311	0.662836	6	0.0426667	0	0.171429	1.5996	7.97068	2.10806	0.040404	0	122.885	2.60809	0	0	0	125.977	0	155.68	0.508471	2	0.739345	0	0	0	175.213	0	0.959916	0.0297143	0.453059	-0.965232	0.00835418	8.13532	0.0428922	0	1	0	3	0	0.0480048	0.944941	1.5
2164172	3.71	0	0.25	1.057	3.05789	0.5625	56.834	1.07316	0.764261	6	0.0517647	0	0.222222	1.19341	8.16728	1.13974	0.0966184	0	145.791	3.33768	0	0	0	132.953	1	154.69	0.701947	1	0.826575	1	0	3.53278	173.243	0	0.633047	0.0333952	0.370314	-0.762905	0.110158	8.42712	0.0329861	0	0	0	2	0	2.0621	5.77497	1.19055
628762	3.75	0	0.666667	2.814	2.6343	1	29.3904	1.13007	0.575319	0	0.0266667	0	0	0.0774748	0	1.65642	0.0444444	0	116.261	1.61839	0	0	0	0	0	145.653	0.395941	0	0.597046	0	3	5.67624	118.458	0	0.556534	0	1.35616	-0.171579	1.11e-16	7.62954	0.0277778	0	0	0	0	0	0.419645	0	0
619727	3.78	0	0.0909091	0.674	1.32548	0.181818	39.152	0.773958	0.795234	6	0.0527778	0	0.4	0.994423	11.6709	0.804654	0.0952381	0	167.666	2.84022	1	0	0	229.458	1	148.215	0.726978	0	0.897617	1	0	4.88359	150.97	0	0.512333	0.0272109	0.409438	-0.338978	0.0313481	8.79071	0.0746528	0	0	0	2	0	2.11935	6.59754	0.333333
106445	3.82	0	0	1.338	1.42022	0.25	36.8433	0.939889	0.738205	6	0.151111	0	0.375	0.475397	6.71846	0.952603	0.0888889	0	100.265	2.70282	0	0	0	31.0837	1	143.622	0.675705	0	0.831955	0	0	3.30193	71.5009	0	0.939216	0	0.524909	-0.525123	1.11e-16	7.04594	0	0	0	0	2	0	1.6556	5.65685	0.333333
764012	3.84	0	0	0.368	0.08159	0.25	21.3423	1.13207	0.822491	0	0	0	0	0	0	1.17904	0.0740741	0	141.593	2.22219	0	0	0	0	0	148.452	0.642357	0	0.769934	0	0	2.3811	54.728	0	1.07764	0	1.10887	-0.503087	1.11e-16	7.58419	0	0	0	0	0	0	0.614186	0	0
619501	3.89	0	0.230769	0.887	1.2404	0.384615	44.9418	0.955904	0.806164	6	0.0385185	0	0.3	0.975907	8.8458	1.10439	0.117647	0	171.785	3.28418	1	0	1	122.663	1	148.948	0.759889	0	0.898715	2	0	3.30193	160.605	0	0.581799	0.0406531	0.47782	-0.554355	0.0120321	8.40538	0.0555556	0	0	0	2	0	2.05148	7.06555	1.31037
2216515	3.92	0	0.0909091	3.211	2.4395	0.454545	44.9238	1.4016	0.625284	0	0.0493333	0	0.193548	0.500943	6.94656	1.42862	0.103704	0	101.648	1.89048	0	0	0	78.8854	0	145.671	0.381591	0	0.69212	0	4	1.65096	80.4688	0	1.32031	0	0.73552	-0.470789	0.0198784	7.23847	0.0787037	4	0	0	0	0	0.43073	6.8308	3.14735
121879	3.96	0	0.0909091	1.118	1.6894	0.363636	42.4395	0.636775	0.78891	6	0.0816667	0	0.375	0.259345	9.47117	0.835324	0.118519	0	161.641	3.15564	1	0	0	82.0136	0	155.288	0.78891	0	0.9375	1	0	1.65096	145.555	1	0.507186	0	0.387964	-0.519053	0.0570985	8.76279	0.0472222	0	0	0	3	0	0.622048	5.8538	1.65096
100414	4.01	0	0.125	2.938	2.249	0.25	40.0862	1.0625	0.665336	6	0.0503704	0	0.333333	0.6375	6.71846	1.0625	0.0493827	0	123.307	2.23498	0	0	0	31.0837	1	141.421	0.535977	0	0.793365	0	1	7.73232	85.776	0	1.0625	0	0.985577	-0.0240443	0.0775576	6.93567	0.0625	0	0	0	1	0	2.29432	3.96541	0
97029	4.08	0	0.153846	1.616	0.8032	0.384615	40.941	0.723131	0.766719	6	0.052381	0	0.333333	0.102187	9.47117	0.888173	0.111111	0	166.594	2.933	2	0	0	82.0136	0	161.005	0.70337	0	0.866771	2	0	1.65096	140.001	1	0.555109	0	0.425147	-0.417502	0.0483912	9.15586	0.0648148	0	0	0	3	0	0.401069	5.8538	1.65096
94826	4.14	0	0.333333	2.108	3.237	0.533333	60.7273	0.840833	0.872908	6	0.0471795	0	0.24	1.03213	7.90889	1.1853	0.0818713	0	182.187	3.48307	0	0	1	180.689	0	144.394	0.750039	0	0.931092	1	2	5.1095	173.094	0	0.527817	0.0203175	0.441453	-0.573649	0.202049	8.12033	0.0201389	0	0	0.00872386	3	0	1.12042	8.84161	1.78549
95501	4.19	0	0	1.97	2.9934	0.25	40.3882	0.646296	0.535095	6	0.111111	0	0.5	0	0	0.899437	0.111111	0	162.146	1.9183	0	0	0	0	0	138.775	0.535095	0	0.628076	0	0	3.96541	93.802	0	0.458532	0	1.21977	-0.342322	5.55e-17	8.24429	0	0	0	0	2	0	4.58302	4.29828	1
95498	4.23	0	0	1.785	2.36802	0.25	39.954	0.847256	0.714097	6	0.111111	0	0.4	0	0	0.99043	0.111111	0	126.816	2.52323	0	0	0	0	1	140.363	0.645841	0	0.850608	0	0	3.96541	66.8078	0	0.540764	0	0.894766	-0.352334	1.11e-16	7.04225	0	0	0	0	2	0	4.92174	4.29828	1
86577	4.28	0	0.0714286	2.175	2.607	0.142857	52.3705	0.780696	0.662636	10	0.045037	0	0.5	0.587082	8.09482	0.752879	0.0818713	0	193.333	2.25678	1	0	0	56.5487	2	144.1	0.52217	0	0.843707	1	0	8.73703	155.965	0	0.590406	0.04	0.351591	-0.153171	0.0467068	8.0832	0.0270062	0	0	0	1	0	4.67035	10.1274	2.3811
95761	4.33	0	0	1.478	2.5756	0.333333	43.938	0.56822	0.746547	6	0.103333	0	0.428571	0.130935	0	0.815547	0.111111	0	150.81	2.69951	0	0	0	0	0	147.937	0.709026	0	0.924957	0	0	1.65096	116.487	1	0.491105	0	0.536532	-0.553787	0.0232586	8.05682	0	0	0	0	3	0	0.891325	5.8538	1.65096
818611	4.38	1	0.571429	-0.176	-0.36591	0.714286	28.3528	1.24752	0.84375	0	0.04	0	0	0.933396	7.45654	1.6024	0.0952381	0	147.913	3.07782	0	1	2	54.2728	0	150.053	0.769455	0	0.875	1	0	1.31037	139.115	0	0.867466	0	0.842082	-0.618871	0.0822342	8.01643	0.0185185	0	0	0	0	0	0.00527076	1.65096	0
111864	4.4	0	0.75	3.06	2.3056	1	32.3026	1.56196	0.55593	0	0.016	0	0	0.910971	7.03319	1.58107	0.031746	0	96.0077	1.70033	0	0	0	83.0324	0	149.985	0.353694	0	0.676762	0	6	9.33326	93.2091	1	1.5524	0.0136054	0.917129	-0.484641	2.22e-16	7.01696	0.0138889	0	0	0	0	0	5.83223	0	0
2245387	4.42	0	0	4.4	2.92386	0.214286	61.9988	0.964286	0.619153	10	0.0813675	0	0.37037	1.25357	6.8931	0.964286	0.1	0	160.236	2.41198	0	0	0	67.6819	5	139.958	0.507264	0	0.694005	0	0	4.25141	120.657	0	0.964286	0.0266667	0.594691	-0.0330326	0.0265365	7.01457	0.0355903	0	0	0	3	0	10.8044	11.6407	5.08568
98544	4.47	0	0.0909091	2.718	2.6897	0.454545	50.468	1.10608	0.609943	6	0.0527778	0	0.24	0.84102	8.88278	1.12009	0.111111	0	110.501	2.67249	0	0	0	90.1944	1	143.883	0.575489	0	0.678851	0	0	3.30193	100.501	0	1.07502	0	0.444042	-0.542199	0.0467481	7.0275	0.0885417	0	0	0	2	0	4.84396	5.65685	0.333333
110543	4.54	0	0.6	3.754	2.5866	1	23.4438	1.66667	0.473501	0	0.04	0	0	0.753968	6.71846	1.66667	0.0555556	0	85.4173	1.15678	0	0	0	31.0837	0	146.194	0.267654	0	0.519777	0	4	3.96541	76.6009	0	1.66667	0	1.07955	-0.160298	2.22e-16	6.89675	0	0	0	0	0	0	1.10124	0	0
634935	4.59	0	0	2.055	3.229	0.4	48.6542	0.466055	0.76071	6	0.0749206	0	0.428571	0.137361	0	0.792648	0.111111	0	230.65	2.69951	0	0	0	0	0	147.429	0.709026	0	0.849915	0	0	0.5	106.034	1	0.498457	0	0.628901	-0.582548	0.0319804	7.80252	0	0	0	0	4	0	1.72344	5.11154	3.53278
2460493	4.64	0	0.0909091	2.129	2.7076	0.454545	48.6372	0.720784	0.816442	6	0.0804938	0	0.352941	0.57257	9.0072	1.12409	0.118519	0	197.278	3.21953	0	0	0	125.161	0	144.92	0.787659	0	0.816442	0	0	0.333333	141.147	0	0.502874	0	0.776057	-0.42615	0.0629421	8.07045	0.0295139	0	0	0	4	0	1.16446	5.65685	3.30193
118796	4.7	0	0	2.994	3.6797	0.4	55.1639	0.425187	0.776432	6	0.0749206	0	0.461538	1.41389	0	0.594599	0.111111	0	312.51	2.66123	0	0	0	0	0	138.817	0.719165	0	0.875275	0	0	0.5	143.797	0	0.556883	0	0.655322	-0.527954	0.0319804	8.16735	0	0	0	0	4	0	4.83296	5.11154	3.53278
15972608	4.73	0	0.388889	2.222	3.51419	0.611111	77.7131	1.14607	0.774249	6	0.0457778	0	0.157895	1.17547	7.44987	1.56211	0.0966184	0	193.233	3.01117	0	0	1	92.5054	2	146.164	0.573783	0	0.808121	1	2	6.4105	174.376	0	0.705988	0.0170569	0.713563	-0.360681	0.103663	7.62588	0.0268199	0	0	0	3	0	1.08285	11.7721	3.30193
108361	4.78	0	0	2.322	3.2116	0.25	46.0242	0.572058	0.610529	6	0.0740741	0	0.5	0	0	0.771019	0.0666667	0	220.246	1.9183	0	0	0	0	0	136.609	0.535095	0	0.75	0	0	3.53278	108.939	0	0.494072	0	1.20411	-0.464932	3.89e-16	7.80192	0	0	0	0	2	0	5.33056	5.11154	0.5
66762	4.82	0	0.0714286	1.531	-0.39921	0.142857	85.7036	0.73209	0.709468	12	0.0548889	0	0.567568	0.888982	8.04683	0.87794	0.0867209	0.00308642	211.031	3.37162	0	0	2	206.079	4	141.606	0.647211	0	0.792477	2	1	7.91661	205.517	0	0.652667	0.0202041	0.545001	-0.565826	2.78e-16	8.17148	0.0302288	0	2	0.00858739	0	0	1.16899	21.7918	15.5105
118967	4.88	0	0.1875	1.648	1.63282	0.4375	44.8909	0.868519	0.728752	6	0.0541063	0	0.285714	0.202699	9.47117	0.951466	0.10628	0	194.094	3.06973	3	0	0	82.0136	1	158.653	0.698885	0	0.780302	3	0	0.5	156.659	0	0.447162	0	0.410507	-0.123524	0.0603696	9.54524	0.0606725	0	0	0	4	0	6.19861	5.11154	3.53278
446526	4.96	1	0.111111	0.757	1.6382	0.222222	36.1574	0.856172	0.774872	6	0.0524444	0	0.428571	3e-05	0	0.789203	0.10101	0	140.712	2.40667	0	0	1	0	1	143.05	0.63211	0	0.924957	1	0	5.08568	95.9627	0	0.585296	0	0.715793	-0.243544	0.0850147	8.19276	0.0625	0	0	0	2	0	0.855995	5.67624	1
2894511	5.04	0	0.117647	1.725	3.1532	0.235294	73.0834	0.712599	0.693075	12	0.0469136	0	0.5	1.1419	7.29888	0.797148	0.0966184	0	193.189	2.70044	0	0	0	149.288	2	142.904	0.574508	0	0.873091	1	0	8.57313	192.326	1	0.567572	0.015034	0.627207	-0.472203	0.0728462	7.76037	0.0240741	0	0	0.00925926	4	0	1.75245	14.7862	4.32964
96059	5.11	1	0.5	1.329	1.14408	0.625	35.5803	1.24895	0.817188	0	0.048	0	0	0.794353	6.97507	1.4718	0.123457	0	118.751	2.9206	0	2	3	84.8606	1	145.846	0.687535	0	0.841968	1	0	1	178.361	0	0.906204	0	0	-0.706792	0.132883	7.50225	0.0277778	0	0	0	0	0	3.17517	1.37318	1
1761611	5.19	1	0.1	1.531	1.9672	0.3	45.1693	0.639226	0.918863	6	0.0761905	0	0.4	0.379527	0	0.793346	0.102564	0	176.73	3.05656	0	0	1	0	1	141.663	0.782352	0	1	1	0	2.62074	135.324	0	0.478532	0	0.720081	-0.424625	0.0444717	8.27068	0.0208333	0	0	0	3	0	0.819025	7.48569	1.65096
80068	5.26	0	0.111111	1.952	3.6754	0.333333	79.5039	0.759425	0.639733	12	0.0422222	0	0.448276	0.924373	7.76523	0.889449	0.119658	0	186.492	2.83195	0	0	0	171.357	2	140.561	0.582948	0	0.724911	0	0	8.6919	156.013	0	0.532642	0.0172595	0.792662	-0.560459	5.27e-16	7.35634	0.0373264	0	0	0.00987654	4	0	8.10712	12.362	1.53262
635938	5.31	1	0.1	1.355	1.8581	0.3	42.3513	0.686953	0.918863	6	0.0761905	0	0.4	0.0476753	0	0.859427	0.102564	0	168.799	3.05656	0	0	1	0	1	142.529	0.782352	0	1	1	0	2.62074	125.144	0	0.523831	0	0	-0.42597	0.0444717	8.45171	0.0208333	0	0	0	3	0	0.674041	7.48569	1.65096
22936863	5.38	0	0.25	0.875	2.92488	0.4375	53.5518	1.04703	0.733749	6	0.0324074	0	0.344828	1.68096	8.14176	1.88129	0.0380117	0	156.134	2.79679	0	0	0	129.419	0	154.978	0.575711	2	0.776338	0	4	1	190.741	0	0.630153	0.0165812	0.413095	-0.997254	0.000787	8.1743	0.0332143	2	1	0.015625	3	0	1.93349	2.85738	3.39505
84742	5.45	0	0.5	3.646	3.6004	0.6	73.9672	1.19119	0.66659	6	0.0331624	0	0.142857	1.27811	7.67716	1.38119	0.0833333	0.00413223	159.651	2.74806	0	0	2	155.529	2	144.378	0.509626	0	0.719576	2	4	10.3424	170.483	0	0.891934	0.0121633	0.517841	-0.58572	7.22e-16	8.25801	0.0243056	0	0	0.00997013	2	0	0.0384944	11.9466	3.96541
19398131	5.57	0	0.454545	4.176	5.27479	0.681818	89.042	1.01009	0.782507	6	0.0501852	0	0.146341	1.00076	7.97546	1.47792	0.0952381	0.00638154	179.938	3.07093	0	0	1	156.451	0	144.935	0.573196	0	0.902077	1	3	4.81918	170.661	0	0.543413	0.0193586	0.742982	-0.398136	0.317064	7.94552	0.0244565	1	0	0.010414	4	0	1.13998	8.47055	5.79836
542756	5.67	2	0.25	2.099	1.90389	0.75	25.2766	0.816692	0.929897	0	0	0	0	0	0	1.44465	0.0740741	0	156.937	2.72548	0	0	1	0	0	144.765	0.859793	0	0.818786	0	0	2.3811	0	0	0.500288	0	1.40341	-0.212132	1.11e-16	0	0	0	0	0	0	0	2.30493	0	0
115322	5.79	0	0.142857	3.365	5.0257	0.428571	94.7104	0.610056	0.639733	12	0.0463889	0	0.448276	0.94095	8.27664	0.872455	0.131944	0	249.159	2.83195	0	0	0	234.492	2	139.851	0.582948	0	0.724911	0	0	8.6919	229.569	0	0.481339	0.0363265	0.89907	-0.526125	2.99e-16	8.14192	0.0272817	0	0	0.00987654	4	0	16.7772	12.362	1.53262
97234	5.94	0	0.111111	2.267	4.2331	0.333333	76.7158	0.676784	0.723405	12	0.0637037	0	0.481481	1.03759	8.22818	0.808689	0.0888889	0	186.714	3.0875	0	0	0	197.695	2	141.757	0.649331	0	0.797479	0	1	6.12024	188.503	0	0.530972	0.0192077	0.576236	-0.554681	2.78e-16	7.76904	0.0223765	0	0	0.0102041	6	0	6.16529	16.2881	5.2865
3558698	6.04	0	0.1	2.771	4.91759	0.1	85.9643	0.81464	0.506725	18	0.013545	0	0.580645	0.95109	7.14019	0.929885	0.0598291	0	199.698	1.78609	0	0	0	174.504	2	139.4	0.36052	0	0.754841	0	0	19.7049	207.42	0	0.76807	0.012551	0.97887	-0.303816	1.67e-15	7.33852	0.025	0	1	0.00403124	0	0	7.2474	17.0739	2.94168
58275	6.2	1	0	0.673	1.93809	0.0714286	53.7331	0.814874	0.735853	6	0.0625185	0	0.47619	1.10156	6.86362	0.86776	0.1	0	186.818	2.7745	0	0	0	61.503	3	138.782	0.631671	0	0.861719	2	0	4.5088	157.201	0	0.654046	0.04	0.57142	-0.370545	0.0185668	8.06713	0.0297619	0	0	0	2	0	1.66952	10.5838	6.08364
118741	6.38	0	0	4.278	5.607	0.5	59.253	0.916667	0.278943	6	0.0755556	0	0.5	0	0	0.916667	0.148148	0	482.983	1	0	0	0	0	0	136.407	0.278943	0	0.278943	0	0	0	503.971	0	0.916667	0	1.22222	0	1.67e-16	12.0756	0	0	0	0	6	0	13.0726	0	9.12547
57749	6.55	0	0	4.355	5.60899	0.4	78.1776	0.533092	0.818246	0	0.0604815	0	0.416667	0.110399	0	1.0266	0.168168	0	268.409	2.87581	0	0	0	0	0	138.785	0.627228	0	0.884088	0	4	0	271.968	0	0.502673	0	0.873751	-0.0783227	0.154052	9.33416	0.0479861	4	0	0	0	0	17.9997	3.14735	7.24289
86500	6.7	0	0.25	1.374	2.8284	0.35	78.8537	0.892185	0.794832	6	0.0484848	1	0.322581	0.520717	7.93112	1.07677	0.103175	0.0123457	191.12	3.53484	0	0	1	213.689	1	147.44	0.713505	0	0.846922	1	0	4.11402	203.849	0	0.430018	0.0181406	0.866947	-0.503082	0.119949	8.02466	0.0316358	0	1	0.0119563	2	0	1.22257	6.55185	2.3811
60571	7.33	0	0	3.005	4.40759	0.26087	76.1249	0.57909	0.781901	0	0.052549	0	0.481481	0.420206	9.0072	0.995212	0.143631	0	239.149	2.97711	0	0	0	125.161	0	139.023	0.626116	0	0.813058	0	4	0	236.881	0	0.432911	0.0451852	0.896819	-0.142676	0.0928387	8.70509	0.0544444	6	0	0	0	0	5.46671	4	12.9486
51630581	7.92	0	0.25	3.34	6.83967	0.34375	129.12	0.895425	0.6939	18	0.033679	0	0.442308	1.02373	7.50331	1.04523	0.0671835	0.00753694	186.295	3.18619	0	0	1	185.032	2	141.018	0.558938	0	0.848124	1	1	17.0666	200.023	0	0.633028	0.0246259	0.524589	-0.448527	0.105928	7.93739	0.021149	3	0	0.00873436	5	0	11.254	26.4307	9.47431
64175	0.5	0	0	-0.076	-0.0014	1	12.5551	1.7107	0.76323	0	0	0	0	0	0	1.92931	0	0	31.0837	1.87996	0	0	0	0	0	153.867	0.593063	0	0.652119	0	0	0	0	0	1.34376	0	0.984933	-0.527313	5.55e-16	0	0	0	0	0	0	0	0.0115778	0	0
126818	1.09	0	0	0.573	1.3347	0.2	37.9643	1.20373	0.658438	0	0.0493827	0	0.272727	0	0	1.31248	0.0740741	0	88.1087	2.14036	0	0	0	0	0	143.569	0.479963	0	0.658438	2	3	1.5	94.5994	0	0.902606	0	0.506631	-0.25401	0.0368555	8.56596	0	0	0	0	0	0	0.241081	4.16017	0.5
111773	1.32	0	0.714286	-0.879	-0.3583	1	30.3483	1.60443	0.612328	0	0.02	0	0	0.841621	7.25606	2.1373	0.037037	0	109.277	1.91924	0	0	0	80.4731	0	152.097	0.44407	0	0.696146	0	0	2.94168	90.0664	0	1.04919	0.0204082	1.30728	-0.299854	2.22e-16	7.70873	0.0185185	0	0	0	0	0	0.384152	0	0
5217470	1.65	0	0.153846	-0.248	0.372	0.307692	52.3467	1.11048	0.694135	0	0.0515033	0	0.24	0.759877	7.50643	1.7054	0.123457	0	196.318	2.52307	0	0	2	64.7294	0	149.998	0.543314	0	0.694135	2	1	0.90856	129.172	0	0.613649	0	0.526457	-0.585719	7.22e-16	7.6906	0.0486111	0	1	0	0	0	0.584613	4.30177	1.5
280579	1.81	0	0	-0.504	-0.3824	0	34.0692	1.36321	0.299742	0	0	0	0.4	0	0	2.16363	0.0555556	0	72.9102	1.29546	0	0	0	0	0	152.372	0.299742	0	0.299742	0	0	7.32539	31.0837	0	1.04217	0	1.65873	-0.0680522	8.33e-16	6.71846	0	0	0	0	0	0	0.009216	0	0
77758	1.91	0	0.166667	0.763	0.86019	0.666667	27.1746	1.25264	0.748013	0	0	0	0	0	0	1.28807	0.138889	0	92.9045	2.55805	0	0	0	0	0	146.913	0.625829	0	0.83436	0	1	0.5	46.2934	0	1.17699	0	0.632744	-0.655675	2.84e-16	6.79104	0	0	0	0	0	0	0.0495063	0	0
127060	2.12	0	0	0.428	1.22699	0.75	19.7297	1.41417	0.592981	0	0	0	0	0	0	1.56005	0.111111	0	58.9005	2.12581	0	0	0	0	0	156.281	0.592981	0	0.592981	0	0	0	31.0837	0	1.07321	0	0.375319	-0.262422	0.0608102	6.71846	0	0	0	0	0	0	0.0408444	0	0
15673004	2.23	0	0.333333	1.898	1.3813	1	32.5129	1.58215	0.59958	0	0	0	0	0	0	1.61367	0.0833333	0	64.2994	1.96577	0	0	0	0	0	151.595	0.440811	0	0.59958	0	1	1	61.534	1	1.5663	0	0.721157	-0.542211	0.14543	7.2166	0	0	0	0	0	0	1.1524	0	0
105373	2.36	0	0.5	0.917	0.9595	0.833333	26.7301	1.50826	0.719231	0	0.0266667	0	0	0.753423	6.71846	1.84361	0.111111	0	144.946	2.01574	0	0	1	31.0837	0	148.227	0.493152	0	0.776796	1	1	0.333333	107.848	0	0.998993	0	0.53074	-0.66841	0.0590165	7.44468	0	0	0	0	0	0	0.120895	1.41421	0
29553262	2.44	0	0.222222	2.168	1.6577	1	26.5455	1.33731	0.713427	0	0	0	0	0	0	1.14992	0.192593	0	91.2497	2.52262	0	0	0	0	0	158.959	0.604956	0	0.713427	0	1	0	59.8169	0	0.638524	0	0.76776	-0.394345	0.045698	9.15149	0	1	0	0	0	0	1.51093	0	0
142621	2.56	0	0.571429	1.88	1.6513	0.857143	26.402	1.41139	0.742422	0	0.04	0	0	0.756401	8.59795	1.54788	0.0634921	0	101.52	2.1815	0	0	1	74.3318	0	147.905	0.504751	0	0.797431	1	4	3.96541	98.0714	0	1.11059	0	0.312143	-0.734135	0.0734835	7.52058	0.037037	0	0	0	0	0	1.03571	1.8072	0
2008584	2.61	0	0.0909091	0.775	2.0923	0.363636	46.6096	0.57359	0.800705	6	0.0344444	0	0.375	0.490652	6.71846	0.836299	0.103704	0	240.576	3.03064	0	0	1	31.0837	1	146.953	0.75766	0	0.875	1	0	2.3811	134.491	1	0.494885	0	0.444485	-0.630045	0.0627605	8.46682	0.0625	0	0	0	3	0	1.71715	5.36866	4.24264
115208	2.7	0	0.2	1.337	1.3489	1	28.2158	0.587351	0.76323	0	0	0	0	0	0	1.71401	0.0952381	0	125.161	2.41938	0	0	0	0	0	151.203	0.76323	0	0.652119	0	0	0	0	0	0.579756	0	1.09301	-0.593097	0.108212	0	0	0	0	0	0	0	1.53636	0	0
108996	2.81	0	0	0.14	1.10962	0.142857	31.6683	1.02507	0.873274	6	0.111111	0	0.428571	0	0	1.29339	0.0555556	0	88.2996	2.75343	0	0	2	0	1	145.225	0.723188	0	0.910795	0	0	3.53278	72.9102	0	0.88378	0	0.963691	-0.159379	0.0114498	6.91805	0	0	1	0	1	0	0.027225	2.55577	0
123546	2.87	0	0.333333	0.231	0.5545	0.666667	26.09	1.31256	0.598832	0	0	0	0	0	0	1.49997	0.0634921	0	104.854	1.90689	0	0	0	0	0	145.632	0.488084	0	0.598832	2	1	0	98.3751	0	0.872654	0	0.576307	-0.285321	1.11e-16	8.2944	0	0	0	0	0	0	0.223729	2	0.5
110430	2.94	0	0.571429	2.145	2.1557	0.857143	29.9531	1.49321	0.704207	0	0.04	0	0	0.825622	7.42867	1.57141	0.0634921	0	99.8754	1.82044	0	0	0	74.7309	0	145.611	0.408222	0	0.773058	1	4	3.96541	96.6051	0	1.24448	0	0.500791	-0.345711	0.0734835	7.18074	0.037037	0	0	0	0	0	1.06461	1.8072	0
142289	3.01	0	0.5	2.098	1.8541	1	23.5672	0.99701	0.632099	0	0	0	0	0	0	1.76079	0.0740741	0	125.439	1.68582	0	0	0	0	0	146.436	0.48731	0	0.54119	0	1	2.3811	0	0	0.509293	0	1.26993	-0.139591	1.11e-16	0	0	0	0	0	0	0	1.49769	0	0
4916578	3.09	0	0.2	0.152	2.2618	0.2	62.0632	0.951673	0.721794	12	0.0302222	0	0.538462	0.812277	7.35718	1.22547	0.037037	0	149.532	2.77736	0	0	4	176.365	2	143.957	0.590873	0	0.754524	0	2	13.911	136.71	0	0.819066	0.000163	1.01978	-0.131982	5.55e-16	7.18465	0.0180556	0	2	0.00806248	2	0	0.687573	8.92308	0.333333
64197	3.13	0	0	-0.08	0.0909	0.666667	12.6437	1.2703	0.80188	0	0	0	0	0	0	1.66847	0	0	31.0837	2.40564	0	0	1	0	0	154.005	0.80188	0	0.67688	1	0	0	0	0	0.875957	0	0.361468	-0.835405	0	0	0	0	0	0	0	0	0.052854	0	0
124049	3.18	0	0.555556	0.006	0.716	0.777778	29.3602	1.19153	0.676071	0	0.04	0	0	0.758828	9.4516	1.42968	0.0666667	0	117.623	2.52193	0	0	2	121.937	0	149.615	0.583519	0	0.676071	2	4	3.96541	119.542	0	0.890662	0.0408163	0.3516	-0.761525	7.77e-16	8.1444	0.0222222	0	0	0	0	0	0.972196	3.61441	0.2
121573	3.24	0	0.0909091	-1.127	1.02939	0.272727	44.7527	0.820508	0.786833	6	0.0527778	0	0.333333	1.04465	9.30084	1.07404	0.111111	0	144.483	3.05881	0	0	0	82.7211	0	147.627	0.733542	0	0.893417	2	0	3.30193	113.134	1	0.877482	0	0	-0.732898	0.0467481	8.1178	0.0885417	0	0	0	2	0	0.610899	5.65685	0.333333
927742	3.29	0	0.25	-0.073	0.08159	0.5	19.4928	1.13207	0.894886	0	0	0	0	0	0	1.17904	0.0740741	0	98.4457	2.73216	0	0	0	0	0	148.452	0.789771	0	0.894886	0	1	2.3811	64.7294	0	1.07764	0	1.06633	-0.429738	1.11e-16	7.50643	0	0	0	0	0	0	0.326955	0	0
2117115	3.38	0	0.2	0.387	0.47009	0.6	24.4908	1.20433	0.873274	0	0	0	0	0	0	1.24473	0.0888889	0	86.6074	2.69951	0	0	0	0	0	147.505	0.709026	0	0.873274	0	2	1	98.1115	0	1.13343	0	0.84659	-0.463671	0.0761289	7.39683	0	1	0	0	0	0	0.13535	1.41421	0
96184	3.41	0	0.4	2.379	2.0714	1	29.6691	0.813699	0.684657	0	0	0	0	0	0	1.73752	0.133333	0	125.439	1.78993	0	0	0	0	0	145.726	0.517406	0	0.593747	0	1	0.5	0	0	0.504768	0	0.962552	-0.0563747	8.91e-17	0	0	1	0	0	0	0	4.86511	2	0
587020	3.44	0	0.111111	1.391	1.8312	0.333333	43.636	1.01317	0.806164	6	0.0684444	0	0.3	0.583847	6.71846	1.01633	0.0606061	0	125.024	2.84145	0	0	0	31.0837	1	147.57	0.657449	0	0.898715	0	1	4.94145	98.4553	1	1.08411	0	0.534704	-0.532121	0.0799914	7.15659	0.03125	0	0	0	2	0	0.101124	6.2612	0.5
13171216	3.48	0	0.470588	1.077	1.68879	0.823529	69.9196	1.32846	0.73139	0	0.0433333	0	0	1.02083	7.60845	2.1215	0.135266	0	179.827	2.81187	0	0	1	116.512	0	149.025	0.539763	0	0.73139	2	0	0.5	157.415	0	0.700884	0.0204082	0.559163	-0.825458	0.00714562	8.19007	0.0277778	0	0	0.00987654	0	0	1.01143	2.08008	2.3811
4920778	3.52	0	0.0909091	1.991	1.61272	0.363636	40.061	0.883331	0.873302	6	0.0344444	0	0.333333	2.79e-05	0	0.921285	0.103704	0	159.311	3.37744	1	0	0	0	1	150.241	0.809953	0	0.936651	1	0	2.3811	97.1517	0	0.6816	0	0.421785	-0.426317	0.0627605	8.60224	0.0625	0	0	0	3	0	2.25	4.58576	2.3811
2150472	3.57	0	0.166667	1.491	0.8844	0.416667	44.9351	0.883022	0.843707	6	0.0477778	0	0.3	0.937197	7.38635	1.09074	0.111111	0	164.614	3.3087	0	0	1	72.7147	1	147.169	0.76556	0	0.921853	1	0	1.65096	145.258	0	0.771989	0.0269388	0.643818	-0.569471	0.0561532	8.32115	0.0439815	0	0	0	3	0	0.00861184	6.8308	3.14735
98884	3.61	0	0.111111	1.64	2.0656	0.222222	40.8135	0.752875	0.655469	6	0.0382222	0	0.428571	0.0716117	0	0.919712	0.0808081	0	164.74	2.14883	0	0	1	0	1	139.467	0.56439	0	0.798231	1	0	6.08364	150.664	0	0.486897	0	0.708285	-0.489951	0.030857	8.56528	0.0625	0	0	0	1	0	2.46459	4.7451	1
94097	3.67	0	0.25	0.601	1.4455	0.416667	49.5677	0.993635	0.800514	6	0.0382222	0	0.26087	1.20442	7.40603	1.15054	0.103704	0	156.469	3.23619	0	0	1	97.3379	1	148.323	0.715407	0	0.877406	1	0	3.83852	149.782	1	0.851099	0.0202449	0.542676	-0.634128	0.0826679	7.86785	0.0376984	0	0	0	2	0	0.0743653	7.73232	1.31037
111682	3.72	0	0.714286	2.491	1.9155	1	29.391	1.57065	0.597498	0	0.02	0	0	0.891384	7.05043	1.5948	0.037037	0	93.2091	1.75534	0	0	0	72.2196	0	150.689	0.377991	0	0.715585	0	5	7.47342	89.2111	1	1.55853	0.0204082	0.915444	-0.499146	2.22e-16	7.02334	0.0185185	0	0	0	0	0	4.52413	0	0
56108124	3.75	0	0.153846	2.026	2.083	0.461538	55.0839	1.06078	0.648721	6	0.0418519	0	0.214286	0.694122	7.92399	1.0984	0.116959	0	123.525	2.97578	0	0	1	184.313	2	146.343	0.619005	0	0.693296	1	0	3.30193	106.684	1	0.998992	0.0489796	0.354051	-0.722571	0.056471	7.17748	0.0798611	0	0	0	2	0	3.73881	7.06555	1.31037
2357473	3.78	0	0.0833333	1.32	2.0856	0.5	39.8479	0.791073	0.83436	6	0.0608547	0	0.352941	1.19827	0	0.871218	0.111111	0	157.645	3.13072	0	0	0	0	1	158.271	0.765932	0	0.902789	0	0	1.65096	141.176	1	0.55199	0	0.471685	-0.593986	0.0103015	9.49464	0.0267857	0	0	0	3	0	1.03836	5.8538	1.65096
108383	3.82	0	0	2.866	1.74264	0.25	39.5198	1.0625	0.606844	6	0.0740741	0	0.333333	0	0	1.0625	0.0666667	0	105.613	2.19716	0	0	0	0	2	141.421	0.526906	0	0.713427	0	0	3.53278	86.8523	0	1.0625	0	0.62943	0.0366116	3.89e-16	6.98458	0	0	0	0	2	0	5.27253	5.11154	0.5
2163793	3.84	0	0.166667	2.461	2.0823	0.277778	57.0775	1.22168	0.685444	0	0.0405208	0	0.263158	0.825687	7.30843	1.57193	0.0823045	0	113.271	2.25192	0	0	0	114.764	0	147.66	0.429106	1	0.811907	1	6	4.13085	117.574	0	1.02028	0.0317045	0.385798	-0.723839	0.191802	7.3355	0.0317659	5	0	0.015625	0	0	1.33795	13.1836	7.33146
95487	3.89	0	0	1.127	1.84552	0.25	36.8433	0.939889	0.769455	6	0.111111	0	0.375	0	0	0.952603	0.111111	0	108.71	2.70282	0	0	0	0	1	143.622	0.675705	0	0.894455	0	0	3.96541	57.1501	0	0.939216	0	0.5774	-0.534672	5.55e-17	6.98227	0	0	0	0	2	0	1.6556	4.29828	1
89781	3.92	0	0.0909091	3.211	2.4395	0.454545	44.9238	1.4016	0.625284	0	0.0493333	0	0.193548	0.500943	6.94656	1.42862	0.103704	0	101.648	1.89048	0	0	0	78.8854	0	145.671	0.381591	0	0.69212	0	4	1.65096	80.4688	0	1.32031	0	0.73552	-0.470789	0.0198784	7.23847	0.0787037	4	0	0	0	0	0.43073	6.8308	3.14735
821556	3.97	0	0.666667	3.283	2.9359	0.888889	35.7763	1.49452	0.617521	0	0.0266667	0	0	0.894831	7.18074	1.55554	0.0493827	0	103.473	1.71206	0	0	0	96.6051	0	145.33	0.356133	0	0.734228	1	6	7.47342	101.992	0	1.29118	0.0204082	0.496088	-0.32118	0.062731	7.11243	0.0222222	0	0	0	0	0	2.58502	2.00415	0
95012	4.02	1	0.1	0.697	0.9103	0.3	39.2406	0.751713	0.863205	6	0.0647619	0	0.375	0.378845	8.09482	0.834662	0.102564	0	140.269	2.82782	0	0	1	56.5487	1	145.653	0.706955	0	0.96875	1	0	2.74946	95.7796	0	0.777774	0	0.730767	-0.472753	0.0445272	8.1505	0.0590278	0	0	0	3	0	0.0122766	7.30837	1.65096
102089	4.08	0	0.235294	1.917	4.09559	0.235294	78.5005	0.781718	0.53398	12	0.0308148	0	0.535714	0.977049	7.30665	0.985669	0.031746	0	175.025	2.22026	0	0	0	200.38	0	145.494	0.461847	2	0.676762	0	0	11.7566	197.589	0	0.633003	0.0167347	0.947722	-0.589482	1.28e-15	7.57288	0.0168651	0	0	0.00403124	2	0	4.77248	9.14951	1.19055
83410	4.14	0	0.0909091	1.817	2.12644	0.363636	42.7375	1.00684	0.742422	6	0.0573333	0	0.3	7.22e-05	0	1.01266	0.118519	0	152.167	2.87095	1	0	0	0	2	147.598	0.664275	0	0.797431	1	0	2.3811	87.9117	0	0.717873	0	0	-0.217054	0.0648631	7.78318	0.03125	0	0	0	3	0	6.29759	4.58576	2.3811
1126461	4.19	0	0.181818	1.247	2.1266	0.363636	46.4403	0.868576	0.776776	6	0.0477778	0	0.333333	0.950681	7.1206	1.1653	0.111111	0	173.667	3.01688	0	0	1	99.2708	1	142.526	0.723484	0	0.856714	1	0	3.30193	169.611	0	0.519496	0.0269388	0.613346	-0.605083	0.0336407	8.0502	0.0527778	0	0	0	2	0	2.52079	7.06555	1.31037
32534955	4.24	0	0.434783	6.581	6.67449	0.695652	95.4374	1.04065	0.74306	6	0.0494017	0	0.130435	0.775908	7.81875	1.40378	0.103704	0.00794267	157.388	2.90392	0	0	1	158.226	0	144.098	0.525734	0	0.873016	1	5	4.87067	152.89	0	0.573813	0.020334	0.581991	-0.458918	0.249828	7.57797	0.0234375	2	0	0.00918886	4	0	3.39739	10.9619	5.90717
98828	4.28	0	0.111111	3.442	2.81	0.333333	44.0035	1.11111	0.611071	6	0.0382222	0	0.285714	0.740741	6.71846	1.11111	0.0808081	0	121.161	2.25561	0	0	0	31.0837	1	141.839	0.513536	0	0.715253	0	0	6.08364	94.712	0	1.11111	0	0.821596	-0.0819155	0.030857	6.96372	0.0625	1	0	0	1	0	3.17089	4.7451	1
106434	4.33	0	0	1.996	2.36802	0.25	39.954	0.847256	0.714097	6	0.151111	0	0.4	0.143547	0	0.99043	0.0888889	0	115.056	2.52323	0	0	0	0	1	140.363	0.645841	0	0.782352	0	0	3.30193	87.9063	0	0.540764	0	0.808536	-0.333139	1.11e-16	7.05358	0	0	0	0	2	0	4.92174	5.65685	0.333333
2051618	4.38	0	0.0714286	3.44	4.0554	0.142857	64.1876	0.757279	0.522016	12	0.0277778	0	0.545455	1.09079	7.36656	0.832191	0.0617284	0	194.916	1.77495	0	0	0	125.029	2	137.933	0.398021	0	0.760367	0	0	12.5845	190.902	0	0.542481	0.0167347	1.04022	-0.234977	0.024303	7.33316	0.025	0	0	0	1	0	7.75233	11.6507	1.65096
3452979	4.4	0	0.444444	3.611	2.4411	1	42.6051	1.55122	0.607529	0	0.0266667	0	0	0.634942	7.58419	1.58736	0.0740741	0	85.9845	1.8832	0	0	0	54.728	0	146.973	0.383787	0	0.687249	0	2	1.65096	103.792	0	1.44207	0	0.773181	-0.451856	0.113475	7.23838	0.0416667	1	0	0	0	0	1.62333	2.3811	0
76017	4.43	0	0.166667	3.229	3.1603	1	36.3209	0.508378	0.718546	0	0	0	0	0	0	1.90542	0.148148	0	0	1.54879	0	0	0	0	0	144.288	0.516265	0	0.468546	0	0	0	0	0	0.983264	0	0.906253	-0.392473	0.0547509	0	0	1	0	0	0	0	8.33939	0	0
88062	4.5	0	0	2.466	3.3524	0.4	46.7099	0.474649	0.776432	6	0.0749206	0	0.461538	0.164154	0	0.800873	0.111111	0	256.563	2.66123	0	0	0	0	0	141.815	0.719165	0	0.875275	0	0	0.5	126.243	0	0.518704	0	0.651346	-0.496246	0.0319804	8.54444	0	0	0	0	4	0	3.78847	5.11154	3.53278
78513	4.55	0	0.84	2.79	3.6144	0.96	93.4415	1.53889	0.528306	0	0.0177778	0	0	1.44998	7.87747	1.96783	0.0493827	0.00236127	130.409	1.95415	0	0	0	120.297	0	147.572	0.324481	0	0.631841	1	6	17.713	127.454	0	0.978313	0.0090703	0.836829	-0.586786	2.22e-16	8.06109	0.0123457	0	0	0.00548697	0	0	4.12374	0	0
106241	4.59	2	0.4	2.524	2.52378	0.8	51.2973	1.35011	0.678565	0	0.02	0	0	0.682134	7.2634	1.37375	0.0808081	0	111.836	2.39735	0	0	0	128.873	2	145.813	0.493487	0	0.740709	0	2	4.5088	99.7952	0	1.28219	0.0136054	0.862446	-0.397987	0.0160007	7.19419	0.037037	0	0	0	0	0	5.4742	4.64039	0.25
732116	4.64	0	0.25	1.545	2.1612	0.35	81.9688	0.881808	0.742742	6	0.0340097	1	0.290323	0.489374	7.80938	1.22521	0.10728	0	194.718	3.34129	0	0	2	227.023	2	142.992	0.674437	0	0.768787	2	0	4.28426	210.762	0	0.431584	0.0274376	0.735437	-0.580726	0.161996	7.9486	0.0378086	0	0	0.009375	2	0	3.32187	8.50283	4.24264
2034222	4.7	0	0	2.7	2.2153	0.375	41.3055	0.362223	1	5	0	0	0.555556	0	0	1.28377	0.10101	0	518.228	2.6416	0	0	2	0	0	153.128	0.833333	0	1	0	0	0	0	0	0.644746	0	0	-0.896939	0.0155884	0	0	0	0	0	3	0	5.34534	0	1.88988
90471	4.73	0	0	1.608	1.073	0	58.9107	0.751526	0.673209	12	0.0568421	0	0.608696	1.19361	7.04017	0.857346	0.0740741	0	212.604	2.34965	0	0	0	120.519	2	138.405	0.519424	0	0.884662	1	0	8.91619	205.917	0	0.619537	0.0130612	0.645329	-0.34204	3.76e-16	7.8054	0.0196759	0	1	0	2	0	1.86159	14.5631	6.08364
106638	4.79	1	0.5	1.611	1.29779	0.75	35.3438	1.3765	0.766803	0	0.064	0	0	0.979806	6.94022	1.60866	0.0987654	0	97.4444	2.71212	0	1	2	77.5576	0	146.574	0.617468	0	0.74512	1	0	0.333333	169.852	0	0.998073	0	0.512733	-0.700578	0.0142428	7.55045	0.0222222	1	0	0	0	0	1.19727	2.37841	0.333333
104518	4.83	0	0.3	4.076	3.0292	0.4	46.323	1.15	0.699021	6	0.0251852	0	0.25	1.11714	6.93567	1.15	0.040404	0	121.964	2.34544	0	0	0	85.776	1	142.152	0.51155	0	0.822701	0	3	11.4675	120.005	0	1.15	0.0201361	0.962891	-0.0191637	0.162869	7.00809	0.0180556	0	0	0	1	0	0.55577	4.68731	0
16752775	4.89	0	0.444444	1.049	1.0388	0.777778	39.6027	1.17944	0.834973	0	0.0533333	1	0	1.16199	7.68815	1.54037	0.111111	0	157.926	2.89546	0	0	1	111.773	0	154.286	0.669947	1	0.834973	1	0	0	138.273	0	0.782666	0.0102041	0.455124	-0.834996	9.44e-16	7.85288	0.0277778	0	0	0	0	0	0.571234	0	0.333333
55389	4.96	0	0.3125	3.175	2.49102	0.5625	77.7764	1.01881	0.780086	6	0.0451852	1	0.193548	0.803953	7.73749	1.24583	0.10101	0	187.789	3.13067	0	0	0	144.312	1	142.413	0.631923	0	0.811046	0	0	1.65096	169.528	0	0.589657	0.0304082	1.0674	-0.723148	0.00904789	7.66229	0.030754	0	0	0.00987654	3	0	7.04425	5.8538	1.65096
13608872	5.05	0	0.0833333	2.342	3.8494	0.416667	54.6547	0.657973	0.805578	6	0.0637037	0	0.352941	0.760405	9.0072	0.978728	0.130719	0	254.81	3.01307	0	0	0	125.161	1	139.492	0.737149	0	0.931571	1	0	1	170.7	0	0.475171	0	0.565377	-0.286087	0.0611568	8.27823	0.0472222	0	0	0	4	0	4.2436	5.08568	5.67624
85687	5.12	0	0.375	3.388	3.661	0.416667	91.981	1.01902	0.713307	12	0.0321839	0	0.348837	1.06018	7.73289	1.1714	0.0740741	0.00366176	167.874	2.98179	0	0	2	184.047	3	142.382	0.549511	0	0.835578	2	2	16.001	183.213	0	0.79228	0.0130286	0.555059	-0.547339	0.0316786	8.22343	0.0240575	0	0	0.00727227	3	0	2.36022	16.7202	4.32964
6175491	5.19	0	0.75	4.99	4.1062	0.916667	44.5111	1.49576	0.517408	0	0.0177778	0	0	0.932956	7.09365	1.54166	0.037037	0.0110193	106.078	1.58678	0	0	0	103.473	0	145.084	0.304595	0	0.630172	1	9	13.1851	105.41	0	1.33611	0.0116618	0.498064	-0.291471	0.0483628	7.06909	0.0138889	0	0	0.00987654	0	0	6.1098	2.17016	0
112538	5.27	0	0.833333	5.403	3.8996	1	42.2915	1.53865	0.43146	0	0.00888889	0	0	0.945232	7.07164	1.56485	0.020202	0.00550964	103.038	1.45679	0	0	0	99.4269	0	146.351	0.275626	0	0.539032	0	10	17.1586	102.093	0	1.4544	0.0058309	0.857009	-0.403801	7.22e-16	7.05355	0.00694444	0	0	0.00493827	0	0	10.7414	0	0
14064109	5.31	0	0.545455	1.387	0.95389	0.818182	41.5028	1.21794	0.67792	0	0.0333333	0	0	0.777136	8.73364	1.83828	0.136752	0	206.928	2.43427	0	0	2	127.23	0	148.073	0.538131	0	0.67792	2	1	0.166667	161.054	0	0.597167	0.00816326	0.58014	-0.431165	5.83e-16	8.2189	0.0208333	1	0	0	0	0	1.23299	2.08008	2.3811
100254	5.39	0	0.166667	1.25	1.221	0.333333	37.3912	0.824382	0.625	6	0.0462222	0	0.375	0.24744	13.3517	0.859913	0.111111	0	163.891	2.5	2	0	0	216.391	0	155.767	0.625	0	0.6875	2	0	3.30193	144.834	0	0.45834	0.0408163	0.418864	-0.283938	3.33e-16	9.3029	0.0722222	0	0	0	2	0	3.3489	5.65685	0.333333
13411160	5.48	2	0.210526	0.366	1.93329	0.315789	67.528	0.861848	0.809433	11	0.0509568	0	0.464286	0.956022	8.00104	1.07918	0.0622222	0.0115498	193.253	3.33225	1	0	1	187.293	0	148.444	0.693156	0	0.940567	1	0	8.43176	181.036	0	0.648233	0.0138257	0.578421	-0.473131	0.0146364	7.81828	0.0175926	0	1	0.00980581	4	0	1.42325	11.1862	1.67667
115866	5.57	0	0.24	3.051	5.55317	0.24	101.859	0.913232	0.437611	18	0.0311111	0	0.578947	0.743958	7.56921	1.16995	0.040404	0	203.589	1.91328	0	0	0	234.322	0	140.26	0.364579	0	0.582174	1	0	21.5465	223.72	0	0.711886	0.0146197	0.506542	-0.90265	1.93e-16	8.63838	0.0170455	0	0	0.00403124	3	0	7.679	11.8765	0.75
5598130	5.68	0	0.25	3.54	4.10929	0.5625	70.8383	0.82257	0.793259	6	0.0669136	0	0.26087	0.656712	8.27876	1.51089	0.115942	0	240.796	3.38162	0	0	2	197.674	0	145.283	0.747557	0	0.812482	0	0	0	277.091	0	0.479662	0.0280691	1.21412	-0.713989	0.048686	8.56728	0.0281863	0	1	0	4	0	10.2887	2.82843	3.30193
95943	5.83	0	0	3.124	4.3002	0.4	49.8206	0.504279	0.535095	6	0.100741	0	0.5	0	0	0.895635	0.126984	0	298.837	1.9183	0	0	0	0	0	137.591	0.535095	0	0.535095	0	0	0.333333	346.342	0	0.556125	0	1.10119	-0.314246	3.89e-16	10.2899	0	0	0	0	4	0	8.28404	5.65685	3.30193
79124768	5.95	1	0.166667	2.509	5.09899	0.277778	76.6923	0.722369	0.738094	12	0.0444444	0	0.52	1.00576	7.75048	0.959076	0.0648148	0	206.27	2.6578	0	0	1	217.985	1	139.438	0.572325	0	0.948319	1	0	8.41101	229.745	0	0.474994	0.0201749	0.712536	-0.337303	0.0185051	7.98703	0.0236111	0	0	0.0174477	5	0	4.44577	13.8096	3.23106
3380345	6.05	0	0.111111	3.391	5.64549	0.333333	77.9402	0.624414	0.73628	12	0.0637037	0	0.541667	1.18212	7.90236	0.907286	0.0888889	0	234.736	2.69812	0	0	0	199.33	0	140.942	0.588472	0	0.854597	0	0	4.34812	249.939	0	0.481775	0.0188299	0.666092	-0.504185	5.55e-16	8.08657	0.0251736	0	0	0.00705467	6	0	5.29966	13.2208	4.91315
16245797	6.23	0	0.466667	4.805	5.28009	0.6	61.5192	1.21942	0.640086	6	0.0311111	0	0.157895	0.974328	7.06299	1.21965	0.0522876	0.00928477	117.204	2.53749	0	0	0	116.915	1	146.043	0.483522	0	0.775576	0	7	16.5537	114.413	1	1.24308	0.0112472	0.556237	-0.458818	0.190712	7.00762	0.0145833	0	0	0.00820646	2	0	2.57025	7.18782	0.333333
596850	6.38	1	0.181818	7.244	5.35478	0.409091	89.8443	1.27788	0.670433	0	0.0506397	0	0.181818	0.694423	7.2911	1.28803	0.133333	0	128.785	2.62272	0	2	2	126.817	1	143.826	0.453651	0	0.800977	0	7	8.20535	111.026	0	1.24413	0.0188069	0.57997	-0.484169	0.269236	7.0312	0.0509259	2	0	0.0119468	0	0	6.27152	9.32339	1.65096
37529309	6.58	0	0.529412	5.943	4.952	0.647059	67.3424	1.25402	0.582604	6	0.0263248	0	0.136364	0.970914	7.04615	1.25411	0.0467836	0.00530558	116.331	2.40855	0	0	0	115.793	1	145.812	0.441173	0	0.709533	0	9	20.6742	113.95	1	1.27224	0.00920223	0.571297	-0.438693	0.183034	7.00391	0.0121528	0	0	0.0063828	2	0	4.74891	7.09404	0.333333
28689089	6.72	0	0.142857	2.404	2.5278	0.428571	46.8236	0.566732	0.84375	6	0.0630688	0	0.375	0.065543	0	0.804057	0.0888889	0	263.178	3	2	0	0	0	0	154.879	0.75	0	0.9375	2	0	0.5	225.672	0	0.497082	0	0.41462	0.0602143	0.0122926	11.0844	0.0277778	0	0	0	4	0	6.59154	5.11154	3.53278
206440	7.35	0	0	4.814	4.584	0	75.2282	0.700431	0.470352	16	0.021412	0	0.615385	1.25744	6.91805	0.700431	0.0634921	0	229.367	1.54858	0	0	0	72.9102	6	135.873	0.329454	0	0.719628	0	0	13.8936	188.409	0	0.700431	0.00814815	0.936632	-0.0965727	0.0506009	7.19168	0.0156349	0	0	0	0	0	6.59873	22.864	9.3755
39515418	8.17	0	0.214286	3.628	5.42867	0.357143	107.65	0.993077	0.649958	12	0.031381	0	0.387755	1.12873	7.4157	1.11671	0.138177	0.0134829	153.186	3.11753	0	0	1	181.512	1	141.994	0.555244	0	0.746386	1	1	12.5511	151.804	0	0.808461	0.027615	0.47742	-0.4642	0.101707	7.83873	0.0258923	2	0	0.0134276	3	0	9.20334	15.36	4.77054
110805	0.53	0	0.6	-0.266	0.0152	1	23.5986	1.61681	0.683365	0	0.04	0	0	0.207788	6.71846	2.00275	0.0555556	0	112.633	1.91974	0	0	0	31.0837	0	151.794	0.479934	0	0.800705	0	0	1.65096	77.1586	0	1.15128	0	1.13767	-0.372037	2.22e-16	7.30877	0	0	0	0	0	0	0.0568823	0	0
102716	1.1	0	0.666667	-2.064	-1.7347	1	38.865	1.48776	0.568987	0	0.0266667	0	0	0.32543	7.63603	2.12843	0.0740741	0	123.352	2.16229	0	0	0	48.0604	0	155.184	0.465624	0	0.568987	0	0	6.37712	93.5302	0	1.1453	0	1.00245	-0.436063	6.94e-16	7.7203	0.0277778	0	0	0	0	0	1.68506	0	0
78933	1.35	0	0.25	0.438	0.9854	0.75	21.2183	1.48956	0.76074	0	0	0	0	0	0	1.62497	0.111111	0	74.7309	1.85429	0	0	0	0	0	146.559	0.501099	0	0.76074	1	1	0	31.0837	0	1.11564	0	0.53705	-0.405728	0.0608102	6.71846	0	0	0	0	0	0	0.0281568	1	0
622402	1.69	0	0.222222	-1.046	-0.6891	0.333333	35.3549	1.44026	0.614969	0	0.0302222	0	0.272727	0.210862	7.269	2.10613	0.0444444	0	107.404	2.07173	0	0	0	41.2697	0	152.456	0.464574	0	0.69921	0	0	6.67872	76.5964	0	1.03022	0.04	1.04558	-0.294696	0.132149	7.4267	0.0300926	0	1	0	0	0	0.282599	0	0
112072	1.82	0	0.7	1.401	1.3662	0.9	39.1937	1.51426	0.742802	0	0.0228571	0	0	0.857653	7.52099	1.8676	0.0444444	0	123.098	2.13434	0	0	1	115.607	0	148.102	0.448872	0	0.848033	1	2	4.5088	103.908	0	1.02095	0.0163265	0.626919	-0.455343	0.0574932	7.59212	0.0185185	0	0	0.0164609	0	0	0.525915	1.19921	0
872504	1.97	0	0	-0.17	0.2386	0.142857	25.3112	1.32522	0.831955	0	0	0	0.3125	0	0	1.93938	0.123457	0	75.2703	2.21692	0	0	1	0	0	150.175	0.554229	0	0.831955	1	2	2.3811	31.0837	0	0.921511	0	0.489207	-0.531349	0	6.71846	0	0	0	0	0	0	0.599231	1.88988	0
1634044	2.12	0	0.2	1.32	1.4313	1	26.8163	1.69834	0.493208	0	0	0	0	0	0	1.94059	0.0952381	0	64.5449	1.51579	0	0	0	0	0	148.502	0.363505	0	0.493208	0	0	0	31.0837	0	1.33079	0	0.938204	-0.291621	0.108212	6.71846	0	0	0	0	0	0	0.963931	0	0
55210	2.26	0	0.111111	0.254	0.7855	0.222222	37.1772	0.816202	0.681804	6	0.0382222	0	0.375	0.455636	6.71846	0.875074	0.0808081	0	141.475	2.42379	0	0	1	31.0837	1	147.841	0.605949	0	0.831955	1	0	6.08364	101.287	1	0.817966	0	0.458557	-0.713734	0.030857	7.65903	0.0625	0	0	0	1	0	0.328329	4.7451	1
591786	2.37	0	0.5	1.576	1.7656	0.833333	27.0415	1.4923	0.733495	0	0.0533333	0	0	0.87581	6.71846	1.58332	0.0740741	0	96.6051	1.87848	0	0	0	31.0837	0	145.821	0.44221	0	0.783055	1	3	2.3811	90.8821	0	1.21233	0	0.507005	-0.360446	0.0772246	7.25331	0	0	0	0	0	0	0.553238	1.65096	0
109739	2.44	0	0.5	0.784	0.7452	1	20.6562	1.62153	0.738205	0	0	0	0	0	0	1.68359	0.0740741	0	72.2196	1.96692	0	0	0	0	0	154.495	0.491729	0	0.769455	0	2	2.3811	53.4139	1	1.59024	0	0.932785	-0.553655	1.11e-16	7.08376	0	0	0	0	0	0	1.59517	0	0
626937	2.57	0	0.5	1.88	1.5574	1	26.4947	1.57588	0.663703	0	0.0533333	0	0	0.77692	6.71846	1.63345	0.0740741	0	86.5483	1.77991	0	0	0	31.0837	0	148.155	0.405232	0	0.780302	0	4	2.3811	84.4993	0	1.42062	0	0.766126	-0.513784	0.0772246	7.17295	0	1	0	0	0	0	1.61824	1.65096	0
6948863	2.62	0	0.705882	1.343	1.7164	1	70.8125	1.62326	0.579514	0	0.0278261	0	0	1.10513	7.11398	2.19457	0.0584795	0	144.172	1.96137	0	0	0	96.5788	0	150.414	0.353107	0	0.579514	0	0	3.32123	121.255	0	1.10673	0.0090703	1.33062	-0.385485	3.61e-16	7.84253	0.0277778	2	0	0.00823045	0	0	1.43401	4.36449	0.25
683727	2.73	0	0.2	-0.157	0.2754	0.8	22.8417	0.559748	0.859793	0	0	0	0	0	0	1.48901	0.148148	0	93.802	2.72548	0	0	1	0	0	160.53	0.859793	0	0.748682	1	0	0	0	1	0.548541	0	0.503623	-0.622138	4.44e-16	0	0	1	0	0	0	0	0.325128	0	1
105544	2.82	0	0.571429	1.486	1.3496	0.857143	29.6417	1.50595	0.751155	0	0.016	0	0	1.07449	6.85152	1.78739	0.0952381	0	132.636	2.07095	0	0	1	58.968	0	147.615	0.479173	0	0.820569	1	2	1.31037	114.255	0	1.04922	0	0.514771	-0.646217	0	7.96892	0.0277778	0	0	0	0	0	0.00356409	1.88988	0
15045439	2.88	0	0	2.28	2.354	0.444444	38.0587	1.44777	0.457179	0	0	0	0.2	0	0	1.58962	0.0888889	0	85.5276	1.60386	0	0	0	0	0	145.768	0.345372	0	0.457179	0	2	1	72.9102	0	1.2293	0	0	-0.448119	1.67e-16	6.91805	0	0	0	0	0	0	2.38795	0	0
2859678	2.96	0	0.3	-0.381	1.0065	0.4	41.22	1.08422	0.913268	6	0.0251852	0	0.285714	0.761904	7.42809	1.3134	0.040404	0	124.817	3.17757	0	0	2	85.9352	1	146.887	0.723437	0	0.934951	0	2	8.45335	128.233	0	0.96336	0.0201361	0.987965	-0.360943	0.162869	7.36112	0.0180556	0	1	0	1	0	1.32549	4.19536	0
5600215	3.01	0	0	-0.105	1.60531	0.333333	34.9478	0.79649	0.884735	6	0.0555556	0	0.4	0	0	1.5372	0.0555556	0	174.037	3.32323	0	0	1	0	0	156.831	0.850608	0	0.884735	0	0	0	105.845	1	0.541835	0	0.289089	-0.952585	4.44e-16	8.21615	0	0	1	0	3	0	0.0243048	2.08008	1.5
123251	3.09	0	0.636364	0.778	0.8928	0.818182	41.6628	1.40886	0.64398	0	0.032	0	0	1.0156	7.96041	1.80786	0.0925926	0	169.47	2.18879	0	0	2	108.128	0	147.91	0.465656	0	0.64398	2	2	1.89485	134.141	0	0.873236	0.0204082	0.537306	-0.621436	5.27e-16	8.05653	0.0208333	0	0	0.0123457	0	0	0.351412	3.78297	0.333333
112801	3.14	2	0.789474	8.192	6.03469	0.894737	68.917	1.41474	0.521249	0	0.01	0	0	0.968312	7.13987	1.45836	0.0233918	0.00330578	113.854	2.04399	0	0	1	114.365	0	145.291	0.355174	0	0.653009	1	14	27.4082	113.999	0	1.27627	0.0058309	0.337052	-0.595075	0.0286004	7.11753	0.00740741	0	0	0.00411523	0	0	5.48824	2.35278	0
112050	3.18	0	0.7	3.587	2.8216	0.9	35.1368	1.43916	0.589907	0	0.0228571	0	0	0.902392	7.38724	1.53068	0.0444444	0	105.954	1.92706	0	0	1	101.52	0	146.761	0.39668	0	0.705357	1	7	9.33326	104.969	0	1.19912	0.0163265	0.301818	-0.694543	0.0574932	7.25389	0.0185185	0	0	0.0164609	0	0	3.54079	2.071	0
134623	3.24	0	0.285714	2.152	2.19662	0.5	61.4402	1.1864	0.737826	6	0.0338889	0	0.193548	0.823587	7.02373	1.47761	0.0987654	0	156.953	2.75724	0	0	1	112.67	2	145.656	0.556546	0	0.789916	1	0	5.08756	139.2	0	0.989145	0.0253061	0.53764	-0.533095	0.0364241	7.46721	0.0243056	0	0	0	2	0	2.97493	8.15238	1.65096
2447792	3.3	0	0.0909091	0.775	2.0923	0.363636	46.6096	0.57359	0.831955	6	0.0493333	0	0.375	0.573788	9.0072	0.836299	0.103704	0	219.266	3.03064	0	0	1	125.161	1	146.953	0.75766	0	0.9375	1	0	1.65096	138.316	1	0.494885	0	0.438506	-0.693283	0.0198784	8.20556	0.0787037	0	0	0	3	0	1.71715	6.8308	3.14735
552410	3.38	0	0.166667	1.199	1.6034	0.416667	48.7551	0.995889	0.854602	6	0.0511111	0	0.272727	0.606422	7.9542	1.16816	0.0972222	0	175.279	3.23127	0	0	0	128.159	1	145.046	0.724592	0	0.903068	1	0	1.65096	114.726	0	0.800807	0.0272109	0.658587	-0.413382	0.0477429	7.70378	0.0597222	0	0	0	3	0	0.0116208	6.8308	3.14735
287923	3.41	0	0	2.845	1.9505	0	14.558	1.4	0.235045	0	0	0	0.333333	0	0	1.4	0	0	31.0837	0.918296	0	0	0	0	0	144.346	0.235045	0	0.235045	0	5	7.07107	0	0	1.4	0	1.4	1.04e-16	0	0	0	0	0	0	0	0	2.0736	0	0
99978	3.44	0	0.1	1.953	1.78062	0.4	48.8569	1.18453	0.670665	6	0.0637037	0	0.26087	0.521367	7.11763	1.51906	0.102564	0	119.879	2.50055	0	0	0	114.737	1	146.484	0.552783	0	0.747557	0	0	3.30193	94.517	0	1.06383	0	0.761752	-0.0556147	0.0154558	6.98705	0.0787037	0	0	0	2	0	2.62699	5.65685	0.333333
603838	3.48	0	0.0909091	0.722	1.68062	0.363636	42.0053	0.880576	0.807835	6	0.0573333	0	0.315789	6.5e-05	0	0.941247	0.118519	0	150.719	3.28663	1	0	0	0	1	153.934	0.773702	0	0.866748	1	0	2.3811	88.665	1	0.72699	0	0.359955	-0.50507	0.0648631	8.0294	0.03125	0	0	0	3	0	0.750649	4.58576	2.3811
91883	3.53	0	0.307692	1.667	1.53322	0.538462	59.443	1.19923	0.813121	6	0.0387302	0	0.2	0.963379	7.07289	1.4914	0.0833333	0	152.472	2.87291	0	0	0	77.3547	1	147.354	0.585484	0	0.881053	0	0	7.53311	128.484	0	1.07426	0.0235374	0.910478	-0.349633	0.0882625	7.28928	0.0265152	0	0	0	2	0	1.77369	6.63658	0.5
589093	3.57	1	0.3	1.613	2.81078	0.3	48.4429	1.01683	0.757536	6	0.0251852	0	0.285714	1.00245	6.95466	1.18922	0.040404	0	134.706	2.60138	0	1	1	93.5341	0	146.216	0.592257	1	0.861719	0	0	8.364	138.171	0	0.999706	0.0201361	1.03004	-0.360796	0.162869	7.09294	0.0180556	0	0	0	1	0	1.57578	3.79984	0
592461	3.61	4	0.2	3.004	1.99098	0.6	32.1022	1.33333	0.60141	0	0.04	0	0	1	6.71846	1.33333	0.0555556	0	112.153	2.15564	0	0	0	31.0837	0	144.346	0.53891	0	0.60141	0	0	3.96541	97.4373	0	1.33333	0	1.16667	-0.0366574	2.22e-16	6.96943	0	0	0	0	0	0	3.29277	0	0
150685	3.68	0	0.230769	0.754	3.03359	0.461538	56.3357	0.980221	0.731825	6	0.0662222	0	0.25	1.27527	7.29317	1.60807	0.0915033	0	137.023	3.18872	0	0	0	116.757	0	150.304	0.695474	1	0.786351	1	0	3.30193	163.535	0	0.599531	0.0289213	0.508854	-0.794096	0.0264752	7.67134	0.0284722	0	0	0	2	0	0.813965	6.29469	0.965489
107459	3.72	0	0.25	2.775	2.1599	1	41.8715	1.56196	0.484731	0	0	0	0	0	0	1.58107	0.0512821	0	74.1067	1.83962	0	0	0	0	0	149.985	0.382668	0	0.59293	0	1	0	109.836	1	1.5524	0	0.38759	-0.61436	1.11e-16	7.32255	0	0	0	0	0	0	2.96391	0	0
2370630	3.76	0	0.6	0.947	1.30228	0.8	41.7549	1.4063	0.767266	0	0.0342857	0	0	0.882907	7.75871	1.74883	0.10101	0	128.306	2.65288	0	1	2	116.611	1	147.684	0.571266	0	0.849179	1	0	1.65096	126.863	0	0.948708	0.0244898	0.67879	-0.514125	0.145212	7.63868	0.0277778	0	0	0	0	0	1.6502	1.66882	1
108805	3.79	0	0	-1.524	-0.20122	0.333333	24.8325	0.654703	0.557886	6	0.0555556	0	0.5	0	0	2.1097	0.0555556	0	168.83	2	0	0	0	0	0	166.461	0.557886	0	0.557886	0	0	0	83.6645	0	0.846173	0	0.458506	-0.974246	4.44e-16	9.07373	0	0	1	0	3	0	0.394635	0	1.5
110623	3.83	1	0.6	1.725	1.3755	0.8	22.565	1.49112	0.738205	0	0.04	0	0	7.66e-05	0	1.59998	0.0555556	0	90.8821	2.09192	0	0	1	0	0	146.116	0.522979	0	0.75766	1	3	3.96541	78.2915	0	1.17093	0	0.618741	-0.217294	2.22e-16	7.41296	0	0	0	0	0	0	0.465533	0	0
616864	3.85	0	0.230769	2.062	1.99659	0.461538	48.6606	0.982785	0.850928	6	0.0495238	0	0.26087	0.986595	8.19305	1.14656	0.0915033	0	174.342	3.43141	1	0	0	117.814	0	153.812	0.758564	0	0.896629	1	0	2.44949	135.978	1	0.734668	0.0324898	0.417376	-0.416025	0.151624	8.05427	0.0424383	0	0	0	3	0	0.0295152	6.39106	1.65096
108598	3.9	0	0.5	0.343	-0.2775	0.75	28.526	1.38022	0.632884	0	0.04	0	0	0.000146	7.11763	1.98642	0.0987654	0	152.366	2.20511	0	0	2	114.737	0	149.914	0.539481	0	0.632884	2	1	0	103.288	0	0.732152	0	0.656426	-0.510502	7.22e-16	7.43013	0.0138889	0	0	0	0	0	0.00327184	2	0.5
108861	3.93	0	0	1.78	2.4491	0.142857	38.49	0.697115	0.497679	6	0.111111	0	0.5	0	0	0.836358	0.0555556	0	128.297	1.65002	0	0	0	0	0	138.284	0.460262	0	0.610529	0	0	6.08364	70.0114	0	0.459551	0	1.22398	-0.292658	0.0114498	7.26019	0	0	0	0	1	0	3.44511	3.04182	0
939231	3.98	0	0.0769231	1.795	2.797	0.0769231	55.9019	0.844423	0.692034	12	0.00622222	0	0.571429	1.07518	7.23921	1.0109	0.0555556	0	181.855	2.00276	0	0	2	87.7224	2	140.916	0.455968	0	0.905084	0	0	12.7817	163.1	0	0.773183	0.0195918	1.0917	-0.123801	2.78e-17	7.19794	0.0173611	0	1	0	0	0	0.534069	9.0261	1
552896	4.02	1	0.181818	0.858	1.2663	0.272727	39.2473	0.84483	0.84375	6	0.0456566	0	0.375	8.87e-05	0	0.870942	0.0952381	0	175.497	2.7744	1	0	1	0	1	147.877	0.693599	0	0.96875	2	0	5.08568	126.672	0	0.537975	0	0.54049	-0.158414	0.0247608	9.22336	0.0375	0	0	0	2	0	1.5097	5.67624	1
513815	4.08	0	0.2	2.74	1.99098	0.6	28.8584	1.33333	0.53891	0	0	0	0	0	0	1.33333	0.148148	0	83.3668	2.15564	0	2	2	0	2	144.346	0.53891	0	0.53891	0	0	0	31.0837	0	1.33333	0	0.424354	-0.224493	4.44e-16	6.71846	0	0	0	0	0	0	5.32594	0	1
275514	4.15	0	0	3.224	2.8398	0	49.1528	0.805263	0.440438	10	0.015	0	0.555556	0.478125	6.71846	0.805263	0.0634921	0	154.465	1.39215	0	0	0	31.0837	2	137.88	0.333854	0	0.68025	0	0	11.8936	94.5505	0	0.805263	0	1.02622	-0.0602661	0.0593007	6.97356	0	0	0	0	0	0	3.79392	8.59656	1
95636	4.19	0	0	3.258	1.77066	0.333333	43.8018	1.11111	0.544236	6	0.103333	0	0.285714	0.648148	6.71846	1.11111	0.111111	0	117.812	2.12809	0	0	0	31.0837	3	141.839	0.484502	0	0.647335	0	0	1.65096	75.4653	0	1.11111	0	0.547325	0.0482578	0.0232586	6.9033	0	0	0	0	3	0	7.52185	5.8538	1.65096
3206313	4.24	0	0.6	1.374	1.7579	0.8	51.3499	1.40493	0.558448	0	0.03	0	0	1.16842	8.73364	2.20744	0.111111	0	201.234	2.29685	0	0	0	127.23	0	151.61	0.463617	0	0.558448	3	0	0.5	188.99	0	0.76336	0.00816326	0.515009	-0.799304	7.77e-16	8.55857	0.0277778	0	0	0	0	0	3.34414	2.83482	1.5
59507	4.29	0	0	1.493	2.07362	0.333333	41.5595	0.79239	0.85141	6	0.103333	0	0.375	0.0206459	0	0.936929	0.111111	0	134.362	3.10846	0	0	0	0	1	143.178	0.777115	0	0.925705	0	0	1.65096	94.6742	0	0.564578	0	0.517356	-0.575552	0.0232586	7.82728	0	0	0	0	3	0	2.74035	5.8538	1.65096
1689845	4.34	0	0	1.882	2.78888	0.272727	52.6082	0.461829	0.849915	6	0.0804938	0	0.428571	1.03614	8.27885	0.653094	0.103704	0	268.931	3.23593	0	0	0	86.9662	1	140.146	0.849915	0	0.924957	0	0	1.5	213.753	0	0.514578	0	0.541431	-0.473945	0.115127	8.51216	0.0295139	0	0	0	4	0	2.51159	6.60385	3.53278
99650	4.38	0	0.166667	1.25	1.221	0.333333	37.3912	0.824382	0.71875	6	0.0492929	0	0.375	5.67e-05	0	0.859913	0.0972222	0	167.479	2.5	2	0	0	0	0	155.767	0.625	0	0.84375	2	0	3.53278	177.455	0	0.45834	0	0.418089	-0.209596	9.99e-16	9.86532	0.0590278	0	0	0	2	0	3.3489	5.11154	0.5
100425	4.41	1	0.125	2.937	2.14689	0.125	39.8829	0.9375	0.57016	6	0.0503704	0	0.375	0.703125	6.71846	0.9375	0.0493827	0	132.421	1.53064	0	1	1	31.0837	1	139.958	0.38266	0	0.78125	0	0	7.73232	93.5341	0	0.9375	0	0.942029	-0.130205	0.0775576	6.95466	0.0625	0	0	0	1	0	3.66837	3.96541	0
92693	4.44	0	0.0714286	2.782	3.1076	0.142857	61.0769	0.799691	0.56475	12	0.0230303	0	0.521739	1.12406	7.56855	0.798735	0.0740741	0	172.489	1.95579	0	0	0	120.916	2	140.207	0.432357	0	0.800514	0	0	12.7817	163.972	0	0.826522	0.0266667	0.59234	-0.457064	0.0152557	7.18	0.0277778	0	0	0.0204082	1	0	3.43176	11.7085	1.31037
693549	4.51	0	0.7	3.852	3.326	0.9	38.6879	1.49501	0.579833	0	0.0228571	0	0	0.911765	7.13927	1.54999	0.0444444	0	104.568	1.66554	0	0	0	99.8754	0	145.231	0.336188	0	0.698759	1	7	9.33326	103.473	0	1.30866	0.0163265	0.495938	-0.310502	0.0574932	7.09365	0.0185185	0	0	0.0164609	0	0	3.59406	2.071	0
5292455	4.56	0	0.294118	0.741	1.027	0.470588	55.7101	1.00889	0.752358	6	0.0472222	0	0.230769	1.05312	8.54347	1.25509	0.115942	0	202.372	3.35353	1	0	2	126.225	2	148.924	0.713451	0	0.80763	3	0	1.65096	192.892	0	0.585128	0.0249922	0.527986	-0.53425	0.0650895	8.91165	0.04375	0	0	0.00617284	3	0	1.55725	8.09801	4.5088
140885	4.6	1	0.5	0.956	0.66169	0.666667	26.3543	1.33674	0.850608	0	0.0266667	0	0	0.872043	6.71846	1.65198	0.111111	0	155.351	2.81592	0	1	2	31.0837	0	147.528	0.720758	0	0.81648	1	0	0.333333	117.83	0	0.886528	0	0.56892	-0.725232	0.0590165	7.59514	0	0	0	0	0	0	0.743734	1.41421	0
1912249	4.64	0	0.285714	0.755	2.78238	0.571429	54.3212	1.13582	0.713762	6	0.0408333	0	0.214286	1.56064	8.09146	2.09501	0.037037	0	150.443	2.71702	0	0	0	121.643	0	156.991	0.56518	2	0.804877	0	1	0	180.979	0	0.657738	0.0201633	0.446618	-1.02344	0.0218735	8.14918	0.0405093	1	1	0	3	0	0.16925	1.07457	2.3811
102067	4.7	0	0.235294	2.072	3.74546	0.235294	71.7667	0.84377	0.554739	12	0.0308148	0	0.517241	0.847672	7.26712	1.09054	0.031746	0	154.75	2.3601	0	0	0	175.46	0	148.799	0.485819	2	0.69116	0	0	11.7566	170.301	0	0.864317	0.0167347	0.532932	-0.692037	1.28e-15	7.6433	0.0168651	0	0	0.00403124	2	0	2.08427	9.14951	1.19055
1689834	4.74	0	0	2.422	2.47308	0.272727	62.1788	0.430646	0.849915	6	0.0804938	0	0.428571	0.810073	8.27885	0.523381	0.103704	0	314.631	3.23593	0	0	0	86.9662	1	137.954	0.849915	0	0.924957	0	0	1.5	241.953	0	0.523476	0	0.541037	-0.497358	0.115127	7.94513	0.0295139	0	0	0	4	0	1.54853	6.60385	3.53278
5331919	4.8	0	0	1.593	3.64359	0.166667	57.0122	0.655076	0.918863	9	0.0560417	0	0.6	1.23546	7.86283	0.881095	0.0653595	0	240.36	3.27291	0	0	0	78.1224	0	136.52	0.837726	0	1	0	0	1.65096	250.049	0	0.746772	0	1.19483	-0.66745	0.0297185	7.9761	0.0538889	0	0	0	2	0	6.4171	6.44742	2.80397
66332965	4.83	0	0.25	3.249	4.90459	0.458333	88.8173	0.965489	0.752489	12	0.0406536	0	0.358974	0.809599	7.75009	0.941029	0.0718954	0.0136415	188.165	3.37755	0	0	1	180.604	2	147.477	0.639033	1	0.86892	1	1	7.7391	186.862	0	0.657781	0.0194854	0.378916	-0.587057	0.161542	8.45633	0.0284722	1	0	0.0121315	4	0	3.5472	13.9593	4.75006
260946	4.89	0	0	1.383	3.79319	0	65.3271	0.762036	0.629675	14	0.0634921	0	0.608696	1.08174	7.04017	0.908514	0.0606061	0	192.006	1.95579	0	0	0	120.519	2	139.222	0.432357	0	0.884662	0	0	11.6568	189.159	0	0.705797	0.0130612	0.881277	-0.358881	5.55e-16	7.23988	0.0111111	0	1	0	0	0	3.08529	14.2956	3.30193
298044	4.97	0	0.692308	4.167	3.4408	0.923077	72.6323	1.14169	0.651344	0	0.0213333	2	0	1.06055	7.2325	1.24997	0.0888889	0	199.682	2.18923	0	0	0	108.015	0	143.002	0.433993	0	0.758119	0	0	2.70865	158.168	0	0.578637	0.0136054	1.36098	-0.60482	0.222886	7.75237	0.020202	0	0	0.0123457	0	0	9.18393	0	0
534521	5.05	0	0.142857	2.208	1.37992	0.428571	43.2787	0.836312	0.85244	6	0.0684967	0	0.3	0.0117567	9.47117	0.923939	0.111111	0	170.086	3.48418	2	0	0	82.0136	1	155.536	0.806164	0	0.898715	2	0	0.5	158.469	0	0.569618	0	0.438505	-0.382826	0.0542895	8.89688	0.0448718	0	0	0	4	0	2.9354	5.11154	3.53278
17804352	5.12	0	0.363636	1.468	3.38278	0.454545	76.6771	1.08163	0.856839	9	0.0357407	0	0.230769	0.906108	7.89702	1.68603	0.0689655	0.00721865	175.428	3.61823	0	0	0	164.789	0	151.817	0.684571	2	0.915055	2	2	5.97891	180.299	0	0.789024	0.0169876	0.475243	-0.859722	0.265698	8.03492	0.0295337	0	0	0.0111259	1	0	0.00355216	9.3658	4.17979
7212444	5.19	3	0.466667	4.29	4.17487	0.8	73.6714	1.33355	0.71607	0	0.0246154	0	0	0.819982	7.32712	1.34818	0.0935673	0.00472255	113.278	2.67058	0	1	1	140.446	2	144.92	0.495257	0	0.791219	0	4	7.21301	107.136	0	1.28736	0.0145773	0.694695	-0.459792	0.0850598	7.01444	0.0416667	0	0	0.010582	0	0	13.7004	4.95932	0.25
454897	5.28	1	0.166667	1.521	2.14519	0.416667	41.2441	0.888832	0.787659	6	0.0581818	0	0.352941	1.12836	0	0.817159	0.0915033	0	162.544	2.65426	0	0	1	0	2	148.345	0.649365	0	0.902789	1	0	4.94145	170.783	0	0.505606	0	0.46483	-0.545588	0.0607656	9.35858	0.0520833	0	0	0	2	0	3.67834	6.2612	0.5
56207397	5.34	0	0.142857	1.797	1.44782	0.428571	45.223	0.827308	0.788486	6	0.0558025	0	0.285714	0.0548566	13.3517	0.954045	0.122222	0	175.892	3.36804	2	0	0	216.391	1	158.625	0.766803	0	0.861719	2	0	1	113.455	1	0.593956	0.0408163	0.386113	-0.443658	9.99e-16	8.53533	0.0401235	0	0	0	4	0	1.16575	4.29828	3.96541
634902	5.39	0	0	3.124	4.3002	0.4	49.8206	0.504279	0.610529	6	0.0749206	0	0.5	0	0	0.895635	0.111111	0	322.565	1.9183	0	0	0	0	0	137.591	0.535095	0	0.75	0	0	0.5	251.431	0	0.556125	0	1.04489	-0.272883	0.0319804	10.03	0	0	0	0	4	0	8.28404	5.11154	3.53278
818724	5.49	0	0.5	2.36	1.64039	0.75	31.2718	1.31338	0.704399	0	0.032	0	0	0.859305	7.37815	1.34177	0.0833333	0	108.987	2.30532	0	0	0	93.9056	0	146.213	0.509625	0	0.819737	0	5	4.83241	104.65	0	1.23964	0.0136054	0.693566	-0.538434	0.0897976	7.17455	0.0277778	1	0	0	0	0	0.716562	2.64806	0
117817	5.59	0	0.571429	7.654	6.433	0.714286	106.097	1.28667	0.596371	6	0.0311111	0	0.0909091	1.078	7.52393	1.41962	0.0849673	0.00701969	139.46	2.51449	0	0	2	144.019	2	144.367	0.416003	0	0.676586	2	8	16.3075	139.734	0	1.04463	0.0143577	0.496429	-0.560524	2.22e-15	7.63556	0.0241228	2	0	0.00893691	2	0	0.593824	19.6782	5.00829
1647161	5.68	2	0.777778	5.298	3.55138	0.777778	40.8444	1.4	0.613687	0	0.0133333	0	0	0.9	6.96254	1.4	0.0277778	0	106.577	2.21702	0	2	2	102.249	0	144.346	0.461173	0	0.67312	0	6	11.2406	105.643	0	1.4	0.0102041	0.865923	-0.14393	5e-16	6.97125	0.0111111	0	0	0.0123457	0	0	0.599386	0	0
69770236	5.84	1	0.2	3.338	5.08969	0.35	85.1666	0.996834	0.657384	12	0.0364021	0	0.351351	0.888154	7.78288	1.08328	0.0714286	0.0123748	143.179	2.83611	0	0	1	182.376	2	141.362	0.544417	0	0.781898	1	0	10.4966	150.965	0	0.85446	0.0188299	0.600604	-0.343393	0.00750133	7.32353	0.0318627	0	0	0.0140464	4	0	7.46218	13.3479	1.7402
1241947	5.98	0	0.423077	5.158	6.20638	0.5	104.075	1.14279	0.641597	12	0.0369444	0	0.288462	0.972602	7.61984	1.37254	0.0538721	0.00507013	153.939	2.81726	0	0	0	166.125	0	142.918	0.494218	0	0.753664	1	4	20.5748	164.425	0	0.855289	0.0150204	0.493059	-0.907783	0.186511	7.90986	0.0150463	1	0	0.00450264	2	0	1.0286	11.5092	0.64633
57067	6.06	1	0.4	1.721	0.73949	0.4	30.105	0.93257	0.894886	0	0.04	0	0	2.51126	0	1.18723	0.0555556	0	146.514	2.84535	0	1	1	0	0	146.317	0.822491	0	0.894886	0	0	1.65096	217.102	0	0.556334	0	1.23857	-0.536972	2.22e-16	7.50493	0	0	0	0	0	0	0.576385	0	0
3347226	6.25	0	0	0.672	0.4614	0	113.971	0.589499	0.767737	12	0.0569746	0	0.625	0.958227	8.14004	0.676738	0.0980392	0.00892673	314.112	3.73039	0	0	0	334.631	4	134.72	0.667934	0	0.855434	4	0	10.2386	312.944	0	0.713938	0.0199468	0.594365	-0.231177	0.154664	8.39093	0.0301852	0	2	0.0114757	2	0	0.111823	32.939	24.4938
140669	6.43	0	0.2	4.97	4.106	0.6	68.6937	1.21719	0.588284	6	0.0390643	0	0.162162	0.683851	7.39532	1.22985	0.0966184	0	113.449	2.58522	0	0	0	103.277	1	144.033	0.496256	0	0.705349	0	1	4.25141	133.477	0	1.17994	0.0143673	0	-0.522612	0.0291196	7.11356	0.0503472	0	0	0	2	0	12.7542	6.01988	0.333333
1204213	6.59	0	0.285714	1.666	2.2814	0.5	61.5298	0.943139	0.756541	6	0.052549	0	0.24	1.02126	8.01182	1.2976	0.0987654	0	209.246	3.06347	0	0	0	111.474	1	143.938	0.659681	0	0.814725	1	0	2.24958	159.64	0	0.488076	0.0173761	0.805733	-0.241738	0.00385394	7.77642	0.0384615	0	0	0	3	0	0.401702	8.44337	3.30193
608719	6.72	0	0	4.5	5.2047	0.5	70.2323	0.315958	0.618246	6	0.0755556	0	0.461538	2.30991	0	0.39561	0.148148	0	446.931	1.91434	0	0	0	0	0	135.725	0.517328	0	0.776432	0	0	0	367.905	0	0.732047	0	0.625895	-0.3628	1.67e-16	9.38185	0	0	0	0	6	0	9.63357	0	9.12547
50293	7.46	0	0.15	4.056	6.4788	0.4	93.4157	0.643052	0.622937	12	0.0501587	0	0.464286	0.975242	8.23366	0.91273	0.091954	0	248.44	2.70897	0	0	0	240.923	2	138.28	0.563504	0	0.712086	0	0	8.6919	240.094	0	0.466952	0.0403628	1.06923	-0.499716	5.55e-17	8.03173	0.0202991	1	0	0.00987654	4	0	23.1063	15.6241	3.34163
96489713	8.2	1	0.2	4.847	5.85039	0.48	102.386	1.025	0.627188	6	0.0458333	1	0.285714	0.762529	7.68984	1.18353	0.111111	0.00872927	141.243	3.09312	0	0	2	211.9	2	144.369	0.550896	0	0.721692	1	0	5.49322	154.006	0	0.709636	0.0193586	0.501209	-0.308462	0.122461	7.4954	0.0434783	0	1	0.0212529	2	0	10.3497	10.0764	3.10267
111900	0.71	0	0.75	-0.456	0.0318	1	34.6421	1.58872	0.570086	0	0.016	0	0	0.458003	7.30084	2.03281	0.031746	0	124.2	1.84029	0	0	0	112.633	0	151.04	0.406822	0	0.728334	0	0	3.87918	92.9121	0	1.08564	0.0136054	1.23629	-0.314399	2.22e-16	7.54152	0.0138889	0	0	0	0	0	0.136456	0	0
149315	1.13	0	0.428571	0.265	0.3857	1	30.5849	1.49167	0.780753	0	0.02	0	0	0.109166	6.71846	1.60463	0.166667	0	93.2824	2.23127	0	0	0	31.0837	0	149.928	0.500349	0	0.862296	0	2	0.333333	66.3028	0	1.27754	0	0.909621	-0.509257	1.11e-16	7.17361	0	2	0	0	0	0	1.12933	2.82843	1
75058	1.4	0	0	0.031	0.52988	0	11.623	1.23434	0.693426	0	0	0	0	0	0	1.43072	0	0	0	1.79248	0	0	0	0	0	149.964	0.693426	0	0.360093	0	0	0	0	0	0.887423	0	0.430464	-0.2999	4.44e-16	0	0	0	0	0	0	0	0.00198916	0	0
78831	1.72	0	0.25	0.579	0.6347	1	21.5446	1.61168	0.667088	0	0	0	0	0	0	1.70479	0.111111	0	46.8466	1.8716	0	0	0	0	0	149.787	0.479052	0	0.667088	0	0	0	31.0837	0	1.39465	0	0.910457	-0.501236	0.0608102	6.71846	0	1	0	0	0	0	0.0154256	1	0
100378	1.82	0	0.571429	0.2	0.3205	1	34.868	1.64513	0.644186	0	0.032	0	0	0.138892	6.71846	2.17651	0.0952381	0	116.891	1.91235	0	0	0	31.0837	0	152.436	0.422753	0	0.670665	0	0	2.94168	71.3117	0	1.32329	0	0.928671	-0.349253	0.078733	7.1618	0	0	0	0	0	0	0.0792423	0	0
2809214	1.98	0	0.2	-3.815	-2.285	0.8	33.3638	1.03451	0.693288	0	0	0	0	0	0	1.6936	0.185185	0	108.061	2.75506	0	0	0	0	0	153.247	0.648565	0	0.693288	2	0	0	52.9108	0	1.00596	0	0.606164	-0.775237	7.22e-16	7.89819	0	0	0	0	0	0	0.642883	0	0
621421	2.13	0	0.181818	0.314	1.3506	0.363636	44.7549	0.921381	0.85244	6	0.0469136	0	0.3	0.862308	7.93072	1.17869	0.047619	0	150.709	3.28418	0	0	1	82.8463	0	148.812	0.759889	1	0.944991	1	0	3.53278	155.234	0	0.834809	0.02	0.525187	-0.627136	0.104798	7.90827	0.0381944	0	0	0	2	0	0.053546	5.77497	1.19055
103902	2.27	0	0.181818	0.314	1.3506	0.363636	44.7549	0.921381	0.806164	6	0.0627778	0	0.3	0.872557	7.60657	1.17869	0.0634921	0	148.016	3.28418	0	0	1	91.9733	0	148.812	0.759889	1	0.898715	1	0	3.30193	147.417	0	0.834809	0.0538776	0.526534	-0.634779	0.0706765	7.6548	0.0289352	0	0	0	2	0	0.053546	6.29469	0.965489
100516	2.37	0	0.125	0.593	0.8394	0.25	37.0125	0.939889	0.681804	6	0.0503704	0	0.375	0.316887	6.71846	0.952603	0.0493827	0	112.817	2.42379	0	0	0	31.0837	1	143.622	0.605949	0	0.831955	0	0	7.73232	80.5694	0	0.939216	0	1.0418	-0.419429	0.0775576	7.39451	0.0625	0	0	0	1	0	0.576233	3.96541	0
1445756	2.45	0	0.4	1.552	2.29769	0.9	45.1398	1.53718	0.541072	0	0.0123077	0	0	0.600772	6.98458	1.94398	0.0793651	0	145.077	1.89711	0	0	0	86.8523	0	146.795	0.394626	0	0.541072	1	2	0	113.867	0	0.978826	0	0.505178	-0.832865	1.53e-16	8.04732	0.0555556	2	0	0	0	0	0.0487526	0	0.25
623370	2.57	0	0.5	1.669	1.5574	1	26.4947	1.57588	0.642021	0	0.0266667	0	0	0.665912	6.71846	1.63345	0.111111	0	92.1779	1.77991	0	0	0	31.0837	0	148.155	0.405232	0	0.74512	0	4	1.65096	75.4899	0	1.42062	0	0.825824	-0.520947	0.0590165	7.12668	0	1	0	0	0	0	1.61824	2.3811	0
141979	2.64	0	0.5	0.71	0.5286	0.75	31.6018	1.36468	0.832615	0	0.0228571	0	0	1.09394	7.42867	1.70665	0.0740741	0	147.436	2.39428	0	0	1	74.7309	0	147.321	0.563635	0	0.832615	2	1	0.333333	122.408	0	0.847013	0	0.565419	-0.470824	0.046215	8.13273	0.037037	0	0	0	0	0	0.00180625	2.37841	0.5
126114	2.73	0	0.444444	-2.155	-2.1622	0.888889	28.0234	1.21296	0.631096	0	0	0	0	0	0	1.61955	0.166667	0	97.0031	2.68085	1	0	0	0	0	159.678	0.631096	0	0.631096	1	0	1.5	56.5487	0	0.84866	0	0.838365	-0.403923	0.0210673	8.09482	0	0	0	0	0	0	0.942647	0	0
1080326	2.83	0	0.4	1.459	2.8063	0.533333	63.6052	1.20433	0.688286	6	0.0306173	0	0.1875	0.973581	7.14326	1.47761	0.0701754	0	176.201	2.74254	0	0	0	116.03	1	143.67	0.548507	0	0.748346	1	0	9.24753	147.15	0	0.887674	0.0134014	0.695496	-0.655439	0.0191166	7.92116	0.0162037	0	0	0.0204082	1	0	2.23084	4.14646	0
107299	2.89	1	0	0.577	0.4663	0.666667	15.2532	1.38079	0.833333	0	0	0	0	0	0	1.62712	0.111111	0	78.3723	2.6416	0	0	1	0	0	160.757	0.833333	0	0.833333	0	0	0	31.0837	0	1.00103	0	0	-0.21243	2.22e-16	6.71846	0	0	0	0	0	0	0.0197684	0	0
51235042	2.96	0	0.105263	1.254	0.71517	0.263158	51.0579	1.29566	0.648264	0	0.0552381	0	0.307692	0.653648	7.42544	2.10451	0.090535	0	142.588	2.49558	0	0	0	124.461	0	153.195	0.472165	0	0.75853	2	6	6.08364	141.37	0	0.902102	0.0286395	0.422666	-0.966916	0.0500443	7.75031	0.0246212	1	1	0.0107332	0	0	10.9263	5.90705	2.6727
100469	3.02	0	0.125	0.526	0.8058	0.25	38.67	0.944445	0.678147	6	0.0503704	0	0.352941	0.417607	6.71846	0.949868	0.0493827	0	114.614	2.48633	0	0	0	31.0837	1	148.139	0.608282	0	0.816442	0	0	7.73232	80.4468	1	1.03698	0	1.04657	-0.463398	0.0775576	7.11682	0.0625	0	0	0	1	0	0.22043	3.96541	0
50000	3.1	0	0	0.021	-0.1849	0	6.307	1.48774	0.5	0	0	0	0	0	0	1.99991	0	0	0	1.5	0	1	0	0	0	153.196	0.75	0	0	1	0	0	0	0	0.729435	0	0	-0.120787	0	0	0	0	0	0	0	0	0.781633	0	0
625865	3.14	0	0	1.181	1.31644	0.285714	32.3767	1.12063	0.598832	5	0	0	0.333333	0	0	1.29822	0.0740741	0	105.54	2.33957	0	0	0	0	0	144.376	0.598832	0	0.598832	0	0	1	72.9102	0	0.908873	0	0.587073	-0.385383	7.77e-16	6.91805	0	0	0	0	2	0	0.588136	2.82843	0.5
470826	3.18	0	0	2.595	2.7441	0.25	44.0326	1.31636	0.550798	0	0.0952381	0	0.275862	0	0	1.42569	0.111111	0	102.659	1.76096	0	0	0	0	0	144.361	0.362489	0	0.607583	0	4	3.30193	68.7275	0	1.15103	0	0.707923	-0.424936	0.0275541	6.89809	0	1	0	0	0	0	1.71846	2.82843	0
761659	3.25	1	0.7	2.316	2.045	0.9	41.6621	1.54719	0.622913	0	0.0266667	0	0	1.18966	7.21323	1.93277	0.0666667	0	111.087	2.00494	0	0	0	78.2001	0	148.773	0.408596	0	0.677258	1	4	8.17889	113.461	0	1.23113	0.00816326	0.576466	-0.397111	3.39e-16	7.37049	0.0208333	0	0	0	0	0	2.99255	0	0
34274049	3.3	0	0.473684	1.171	1.499	0.684211	77.3302	1.30086	0.706243	6	0.0433778	0	0.142857	1.19249	7.32953	1.7079	0.0676328	0.00884749	157.583	2.82212	0	0	0	105.066	1	149.085	0.523359	1	0.779055	0	1	5.32817	142.782	0	0.943096	0.0130612	1.46145	-0.258793	0.369409	7.77649	0.025	0	0	0.00971163	4	0	1.02698	7.54479	3.53278
110565	3.39	0	0.6	2.456	2.2442	1	26.4788	1.07366	0.587265	0	0.04	0	0	0	0	1.69555	0.0555556	0	118.458	1.6645	0	0	0	0	0	145.954	0.43718	0	0.587265	0	2	3.96541	125.439	0	0.531065	0	1.32324	-0.174403	2.22e-16	8.33092	0	0	0	0	0	0	0.875722	0	0
124174	3.42	0	0.769231	1.211	1.3828	0.923077	50.2372	1.51929	0.667672	0	0.016	0	0	0.794107	7.49006	1.91543	0.034188	0.00826446	126.844	2.08605	0	0	1	123.098	0	148.382	0.410036	0	0.797544	1	2	6.88903	105.298	0	1.00531	0.0102041	0.753633	-0.380939	0.0444945	7.64537	0.0123457	0	0	0.00823045	0	0	0.732907	1.30234	0
98033	3.46	1	0.142857	0.78	1.5606	0.142857	33.294	0.730867	0.947443	5	0.0625	0	0.454545	0	0	0.74961	0.0555556	0	134.287	2.55034	0	0	2	0	0	136.939	0.737214	0	1	1	0	3.30193	56.5487	0	0.684604	0	0.760232	-0.195462	0.124334	8.09482	0	0	0	0	1	0	0.133956	2.82843	0
506967	3.48	0	0	0.757	0.9278	0.666667	19.1011	0.815913	0.758039	0	0	0	0	0	0	1.35903	0	0	0	2.12809	0	0	1	0	0	145.422	0.758039	0	0.472325	1	0	0	0	0	0.522614	0	0.719889	-0.627703	0	0	0	0	0	0	0	0	0.231361	0	0
111706	3.53	0	0.714286	2.558	1.9491	1	27.7335	1.56539	0.593517	0	0.02	0	0	0.850882	7.25255	1.61354	0.037037	0	94.762	1.65942	0	0	0	72.7705	0	147.658	0.361927	0	0.718104	0	5	7.47342	90.8148	0	1.42934	0.0204082	0.870225	-0.447739	2.22e-16	7.13009	0.0185185	0	0	0	0	0	3.37604	0	0
88722	3.57	0	0.1	1.425	2.09842	0.3	38.4555	0.945278	0.787659	6	0.0377778	0	0.352941	4.88e-05	0	0.945804	0.102564	0	146.626	2.86659	1	0	0	0	1	148.172	0.701312	0	0.902789	1	0	3.96541	91.2123	0	0.653538	0	0.342514	-0.226569	0.0515001	8.27325	0.0625	0	0	0	2	0	4.25638	4.29828	1
123057	3.63	1	0.625	3.156	2.4017	0.875	34.8995	1.49394	0.642454	0	0.0266667	0	0	1.00281	7.16234	1.56249	0.0833333	0	106.951	1.89972	0	0	1	58.3632	0	145.453	0.409083	0	0.780271	1	4	4.61054	94.4596	0	1.27018	0	0.601517	-0.220818	0.113694	7.25871	0.0277778	1	0	0	0	0	0.71048	3.49414	0
2455245	3.69	0	0.333333	1.067	1.21089	0.416667	40.9855	1.26674	0.813807	0	0.035625	0	0.192308	1.09534	7.7911	1.55452	0.0888889	0	115.192	2.81507	0	1	2	131.587	1	146.077	0.598896	0	0.879268	1	3	3.30193	150.758	0	0.8829	0.0204082	0.612306	-0.512866	0.0245367	7.80719	0.0316667	1	0	0	0	0	0.0933303	4.06966	1.31037
791286	3.72	0	0.136364	1.977	2.54609	0.136364	97.824	0.827195	0.401769	18	0.0226263	0	0.542857	1.08426	7.064	0.864121	0.0888889	0	217.49	1.64467	0	0	0	134.947	0	137.194	0.320642	0	0.562354	1	0	26.9589	224.183	0	0.887557	0.00979592	0.95293	-0.241504	6.5e-16	7.49103	0.00694444	0	0	0	3	0	3.65039	15.8595	1.5
66251	3.76	1	0.666667	2.294	1.7656	0.833333	25.4766	1.4923	0.699362	0	0.0266667	0	0	0.732295	8.09482	1.58332	0.0444444	0	96.6051	1.99484	0	0	1	56.5487	0	145.821	0.469603	0	0.742848	1	4	5.67624	90.8821	0	1.21233	0	0.604276	-0.208086	3.33e-16	7.25331	0.0277778	0	0	0	0	0	0.941482	0	0
100005	3.8	0	0.1	1.61	2.1072	0.3	38.8897	0.723138	0.774872	6	0.0637037	0	0.428571	0.132847	0	0.833934	0.102564	0	163.367	2.6645	1	0	0	0	0	148.485	0.699829	0	0.849915	1	0	3.30193	149.54	0	0.457355	0	0.372965	-0.375139	0.0154558	9.16539	0.0787037	0	0	0	2	0	3.94181	5.65685	0.333333
3302101	3.83	0	0.4	3.502	2.5334	0.9	44.1852	1.43916	0.632496	0	0.0218182	0	0	0.549322	9.13495	1.53068	0.0634921	0	90.2705	2.18602	0	0	1	86.6883	0	146.761	0.449985	0	0.687403	1	2	0.5	117.046	0	1.19912	0	0.275542	-0.710532	0.0671859	7.56171	0.0666667	1	0	0	0	0	3.26091	3.03934	0.5
115902	3.85	0	0.388889	1.811	4.13739	0.555556	83.4537	1.06815	0.742294	6	0.0357488	0	0.171429	1.03046	7.3011	1.32793	0.0925926	0	211.059	3.12626	0	0	0	139.521	0	142.541	0.609493	0	0.786856	1	0	4.34812	173.079	0	0.637576	0.0188844	0.69994	-0.697496	0.0613291	8.06357	0.0243056	0	0	0.0139582	2	1	2.54945	5.46569	0.333333
108430	3.91	0	0	1.312	2.0456	0.25	37.2775	0.690297	0.792125	6	0.0740741	0	0.461538	0	0	0.837923	0.0666667	0	134.123	2.46967	0	0	0	0	0	142.908	0.667399	0	1	0	0	3.53278	84.8733	0	0.52886	0	0.584421	-0.551626	3.89e-16	8.00669	0	0	0	0	2	0	1.46168	5.11154	0.5
5464711	3.93	0	0.692308	3.356	2.2709	0.923077	46.1583	1.45735	0.631795	0	0.024	0	0	0.937049	7.38046	1.63744	0.0793651	0.00826446	113.527	2.12136	0	0	1	107.633	0	147.294	0.410326	0	0.766224	1	7	9.33326	117.911	0	1.14104	0.0153061	0.607378	-0.554542	0.132184	7.35386	0.0185185	1	0	0.0123457	0	0	5.39308	2.764	1
706149	3.98	0	0.416667	3.313	2.6624	0.5	37.6071	1.36278	0.629573	0	0.025625	0	0.166667	0.906251	7.37734	1.52358	0.047619	0	113.046	1.88794	0	0	1	110.454	0	145.246	0.384753	0	0.794407	1	8	8.07366	110.9	0	1.0692	0.016062	0.453445	-0.5963	0.191894	7.25414	0.0193651	1	0	0.0186471	0	0	3.18052	5.14818	0.5
527606	4.02	0	0	1.7	1.90156	0.4	45.4073	1.06302	0.59958	6	0.0749206	0	0.272727	0.0533029	6.71846	1.07704	0.111111	0	128.033	2.54856	0	0	0	31.0837	3	143.819	0.5715	0	0.648046	0	0	0.5	102.397	0	1.03737	0	0.512543	-0.543007	0.0319804	7.11053	0	0	0	0	4	0	4.75022	5.11154	3.53278
106423	4.08	0	0	2.866	1.74264	0.25	39.5198	1.0625	0.526906	6	0.151111	0	0.333333	1.9125	6.71846	1.0625	0.0888889	0	99.3594	2.19716	0	0	0	31.0837	2	141.421	0.526906	0	0.580198	0	0	3.30193	73.6719	0	1.0625	0	0.64557	0.0366778	1.11e-16	6.87166	0	0	0	0	2	0	5.27253	5.65685	0.333333
2905693	4.17	0	0.166667	1.824	2.78	0.416667	51.1565	0.772783	0.82001	6	0.0611111	0	0.333333	0.942972	7.56475	1.16232	0.111111	0	219.561	3.15522	0	0	1	92.7681	1	142.131	0.756661	0	0.910005	1	0	1.65096	220.628	0	0.478049	0.02	0.607548	-0.551598	0.0848633	8.67179	0.0260417	0	0	0	3	0	3.8275	6.66899	3.30193
626437	4.2	0	0	1.478	2.5756	0.333333	43.938	0.56822	0.76071	6	0.0555556	0	0.428571	0	0	0.815547	0.0555556	0	173.503	2.69951	0	0	0	0	0	147.937	0.709026	0	0.849915	0	0	1.5	118.601	1	0.491105	0	0.50226	-0.596831	4.44e-16	8.50637	0	0	0	0	3	0	0.891325	6.24025	1.5
56348404	4.25	0	0.777778	3.714	3.2728	1	48.0512	1.26643	0.572755	0	0.0133333	2	0	0.917824	7.0653	1.20828	0.0277778	0	110.648	1.62669	0	0	0	110.1	0	142.845	0.338375	0	0.632187	0	4	7.47342	110.433	0	0.905107	0.0102041	0.715945	0.0129503	1.17e-15	7.03686	0.0111111	0	0	0.0123457	0	0	0.066049	0	0
122349	4.31	0	0.307692	0.295	1.79379	0.538462	49.1164	1.10049	0.694135	6	0.0466667	0	0.24	1.27757	7.935	2.16176	0.0416667	0	178.636	2.72489	0	0	0	115.145	0	158.508	0.586773	2	0.711363	0	0	0.166667	179.494	0	0.628357	0.0172595	0.535804	-1.01427	3.33e-16	8.10407	0.0347222	0	1	0	3	0	0.0122988	1.88988	1.5
1484260	4.34	0	0.1875	1.656	3.00909	0.25	69.9003	0.876495	0.684046	12	0.0411111	0	0.5	0.914296	7.18862	0.950817	0.0444444	0	144.481	2.62669	0	0	0	168.586	1	144.769	0.54639	0	0.881135	0	0	13.0774	157.792	1	0.860262	0.00756957	0.866095	-0.410341	0.0407048	7.48388	0.0164141	0	0	0.00886033	3	0	0.680955	10.4424	0.965489
834128	4.38	0	0.333333	0.875	3.25607	0.6	61.6751	1.1795	0.729474	6	0.0385185	1	0.1875	1.30112	7.55217	1.79163	0.0350877	0	154.671	2.68396	0	0	0	128.651	0	154.45	0.536793	2	0.806128	0	1	0	183.454	0	0.849375	0.0270068	0.510303	-1.01767	0.0365895	7.95595	0.0365741	1	1	0	3	0	0.0416568	1.07457	2.3811
99616	4.42	1	0.181818	0.647	1.2663	0.272727	39.2473	0.84483	0.875	6	0.0558025	0	0.375	7.39e-05	0	0.870942	0.0793651	0	157.841	2.7744	1	0	1	0	1	147.877	0.693599	0	1	2	0	4.94145	163.648	0	0.537975	0	0.53399	-0.231652	0.0133388	8.96558	0.0497685	0	0	0	2	0	1.5097	6.2612	0.5
90437	4.45	0	0.0714286	2.571	3.1076	0.142857	61.0769	0.799691	0.568502	12	0.025641	0	0.521739	1.04484	7.07683	0.798735	0.0740741	0	182.936	1.95579	0	0	0	90.8957	2	140.207	0.432357	0	0.777788	0	0	12.4072	170.185	0	0.826522	0.0236735	0.638744	-0.449118	0.0483221	7.46332	0.0166667	0	0	0	1	0	3.43176	11.3998	2.3811
23135220	4.51	0	0.461538	0.37	0.25679	0.769231	53.0132	1.2193	0.725162	0	0.04	1	0	1.17238	7.60993	1.8281	0.125	0	156.984	2.91139	0	0	2	110.568	0	155.197	0.612294	1	0.789538	2	0	0	182.568	0	0.768745	0.0244898	0.522464	-0.676646	0.131096	8.57748	0.0277778	0	0	0	0	0	0.0996665	0	1.31037
107197	4.56	0	0	-0.231	-0.30851	0.333333	15.041	1.01098	0.916667	0	0	0	0	0	0	1.06756	0.111111	0	64.7294	2.75	0	0	0	0	0	150.212	0.916667	0	0.916667	0	0	1	31.0837	0	1.00663	0	1.22338	-0.553362	1.11e-16	6.71846	0	0	0	0	0	0	0.0999824	0	0
544401	4.61	0	0.75	3.881	3.3198	1	40.6617	1.41533	0.56762	0	0.016	1	0	1.06532	6.91937	1.3744	0.031746	0	110.433	1.53049	0	0	0	85.4173	0	144.242	0.321878	0	0.629934	0	4	6.12046	107.376	0	1.05964	0.0136054	1.12249	-0.102708	2.22e-16	7.04596	0.0138889	0	0	0	0	0	0.189747	0	0
122394	4.65	0	0.142857	1.894	4.03029	0.142857	63.867	0.851906	0.466289	12	0.0302222	0	0.541667	0.987048	7.064	0.988353	0.0261438	0	154.916	1.73336	0	0	0	134.947	0	143.109	0.378052	1	0.640948	0	0	13.9953	184.238	0	0.856428	0.00979592	0.944808	-0.349023	6.11e-16	7.21639	0.00138889	0	0	0	2	0	2.22845	8.07939	0.5
66441234	4.71	0	0.259259	3.212	5.03078	0.37037	99.9615	0.926251	0.785298	15	0.0398519	0	0.390244	0.843416	7.66988	1.31377	0.0660661	0.00812883	208.585	3.44079	0	0	1	182.332	0	144.309	0.642232	0	0.911182	1	1	5.89623	198.893	0	0.569669	0.018099	0.602256	-0.652428	0.10169	8.09266	0.0238294	1	0	0.012705	4	0	4.03166	15.9666	6.31051
95750	4.74	0	0	2.362	3.02142	0.333333	44.6702	0.735565	0.722462	6	0.103333	0	0.4	0.151827	0	0.982648	0.111111	0	147.914	2.68925	0	0	0	0	1	139.889	0.688334	0	0.884735	0	0	1.65096	119.265	0	0.472996	0	0.746016	-0.329805	0.0232586	7.81649	0	0	0	0	3	0	6.6936	5.8538	1.65096
525826	4.8	1	0.0526316	2.166	1.11508	0.0526316	69.1542	0.781405	0.588502	13	0.0427513	0	0.592593	0.974001	7.41169	0.875072	0.0683761	0	206.944	2.22013	0	0	0	185.305	2	138.619	0.466915	0	0.835495	1	0	12.506	205.861	0	0.658434	0.00948195	0.633702	-0.344161	0.0994042	7.7073	0.0298203	0	1	0.00806248	0	0	2.97735	16.5181	5.08568
708769	4.83	1	0.230769	1.258	1.2219	0.461538	50.9221	1.02575	0.774036	6	0.0602778	0	0.26087	0.562085	7.08382	1.31201	0.0915033	0	184.468	3.17489	0	0	1	86.4925	1	146.561	0.701855	0	0.793259	1	0	1.14471	129.967	0	0.758015	0.0136054	0.820459	-0.315318	0.0524769	7.83381	0.033179	0	0	0	4	0	0.296916	7.06555	3.53278
92524	4.9	0	0.0769231	3.918	3.402	0.0769231	59.4714	0.836957	0.401381	12	0.00622222	0	0.545455	1.1	6.95466	0.836957	0.0555556	0	175.201	1.34859	0	0	0	93.5341	2	138.241	0.302413	0	0.597281	0	0	15.6903	167.708	0	0.836957	0.0195918	1.078	-0.0483311	2.78e-17	7.12321	0.0173611	0	0	0	0	0	5.83512	9.49021	1
110407	4.98	0	0.764706	3.77	3.2334	0.882353	59.1324	1.44046	0.598154	0	0.015	0	0	0.950554	7.37294	1.67769	0.0617284	0.00826446	134.908	2.05668	0	0	2	114.425	0	146.418	0.37672	0	0.66068	2	8	12.6959	122.592	0	1.04418	0.0102041	0.488545	-0.612381	5.55e-17	7.5181	0.0128205	0	0	0.00740741	0	0	1.28868	5.08435	0.111111
132649	5.05	0	0	1.917	3.51209	0	59.7459	0.752347	0.566342	13	0.0211111	0	0.619048	1.23506	6.9027	0.846669	0.0634921	0	199.533	1.91613	0	0	0	69.6928	2	138.261	0.436245	0	0.739805	0	0	9.7142	180.632	0	0.671037	0.00814815	0.907954	-0.375757	7.49e-16	7.34869	0.0169048	0	0	0	0	0	1.87115	13.1605	4.24264
110065	5.12	0	0.333333	3.666	3.9648	1	54.588	1.2573	0.297442	0	0.12	2	0	1.75461	6.71846	1.18901	0.0793651	0	85.5282	1.42991	0	0	0	31.0837	0	142.875	0.297442	0	0.297442	0	0	0	217.663	0	0.712968	0	0.668878	-0.580206	7.77e-16	7.25859	0	0	0	0	0	0	10.5521	0	0
67721	5.22	0	0.142857	3.882	3.7268	1	41.878	2	0.270426	0	0	0	0	0	0	2	0.166667	0	0	0.811278	0	0	0	0	0	143.273	0.270426	0	0.103759	0	0	0	0	0	2	0	1.16667	-0.428571	6.11e-16	0	0	0	0	0	0	0	11.4001	0	0
2536314	5.28	0	0.0952381	1.208	2.2039	0.238095	78.6034	0.751064	0.761144	12	0.0412091	0	0.433333	1.07672	7.49261	0.903028	0.111111	0	230.083	3.30496	0	0	1	125.476	4	140.766	0.673535	0	0.913354	1	0	7.31528	203.707	0	0.551041	0.0231807	0.690087	-0.491453	0.0261518	8.07671	0.0319136	0	0	0	3	0	2.75261	15.8463	6.91581
116063	5.34	1	0.454545	1.684	1.61949	0.818182	49.2987	1.24325	0.778911	0	0.03	1	0	1.7058	8.04368	1.52967	0.111111	0	116.447	2.96892	0	0	1	142.577	0	151.901	0.631626	1	0.778911	1	0	0	108.142	0	0.829457	0.0204082	0.420747	-0.748133	0.086602	7.72175	0.047619	0	0	0	0	0	1.6157	0.333333	0
145733	5.39	0	0.142857	-0.79	-0.0508	0.285714	35.9199	0.972983	0.750101	0	0.0667901	0	0.304348	0.209739	6.71846	1.2318	0.0740741	0	149.842	2.87139	0	0	2	31.0837	0	147.073	0.634763	0	0.750101	2	4	1	115.518	0	0.740047	0	0.369805	-0.542902	2e-15	8.77657	0.03125	4	0	0	0	0	2.55968	5.24148	8.71337
84695	5.49	0	0.4	3.102	3.3122	0.6	79.059	1.19119	0.6246	6	0.0393162	0	0.142857	1.06197	7.52312	1.38119	0.0940171	0.0165289	133.987	2.74806	0	0	2	167.642	2	144.378	0.509626	0	0.642262	2	0	4.75758	207.159	0	0.891934	0.0203265	0.510788	-0.595137	1.17e-15	8.34498	0.0224359	2	0	0.0111219	2	0	3.996	11.3563	5.00829
1825214	5.63	0	0.0769231	3.941	4.9622	0.538462	61.1803	0.576394	0.638759	6	0.0691667	0	0.375	0.987157	9.0072	1.19662	0.140351	0	352.205	2.25161	0	0	0	125.161	0	141.057	0.562904	0	0.78891	0	0	0	229.171	0	0.557848	0	1.53794	-0.11057	0.0772449	8.90128	0.0196759	0	0	0	6	0	7.55315	0	9.12547
30030252	5.69	0	0.125	1.867	2.0859	0.25	40.0635	0.847256	0.652502	6	0.0503704	0	0.4	0.047849	0	0.99043	0.0493827	0	129.525	2.22561	0	0	0	0	1	140.363	0.569662	0	0.782352	0	0	7.73232	103.586	0	0.540764	0	1.05883	-0.0915389	0.0775576	7.43504	0.0625	0	0	0	1	0	3.85612	3.96541	0
35367385	5.86	0	0.227273	2.152	4.18019	0.363636	79.8751	0.740701	0.7714	12	0.0368724	0	0.533333	0.654318	8.46602	0.908069	0.0814815	0.0133915	198.742	3.26346	0	0	1	220.289	1	148.877	0.665077	2	0.918482	2	0	4.94173	197.217	0	0.519075	0.0173061	0.602931	-0.637791	0.14249	8.59224	0.0329861	0	0	0.0105348	5	0	2.5648	12.8047	6.37223
133073	6	0	0.117647	2.414	3.2585	0.294118	69.4048	0.640074	0.736751	6	0.0482011	1	0.45	1.11701	8.96661	1.22707	0.0854701	0	270.409	2.98418	0	0	2	268.03	2	141.245	0.690475	0	0.783026	2	0	3.96541	284.355	0	0.544023	0.0236678	0.571145	-0.569003	0.124565	9.50186	0.0370679	0	0	0	2	0	15.5512	6.87157	4.24264
6491027	6.08	0	0.190476	2.824	4.22708	0.333333	77.0001	0.70681	0.812563	12	0.0398354	0	0.482759	0.730716	8.00642	0.921435	0.0842912	0.00617284	200.086	3.43374	1	0	1	217.755	1	148.085	0.706825	1	0.971607	2	0	5.91572	197.954	0	0.53605	0.0122857	0.48488	-0.503452	0.102122	8.46694	0.0347222	0	0	0.0102761	5	0	2.39785	12.9652	5.63006
3689245	6.26	0	0.625	4.194	2.9392	0.875	76.611	1.25851	0.507032	0	0.0296296	0	0	1.3614	7.70983	1.65348	0.0952381	0	225.821	2.11652	0	0	0	114.057	0	146.032	0.406284	0	0.507032	0	0	1.14471	190.944	0	0.529236	0.0090703	1.0044	-0.859364	5e-16	8.31823	0.0277778	0	0	0	0	0	8.87563	0	0
4151502	6.45	0	0.333333	7.01	4.8446	0.933333	60.852	1.25161	0.654841	0	0.0498551	0	0	1.00503	11.6861	1.32706	0.210317	0.00550964	221.994	2.54442	0	0	0	202.748	0	167.384	0.488423	1	0.753516	2	6	0	213.665	0	0.78834	0.0248099	0.980357	-0.12372	0.0540711	11.8813	0.0342593	0	0	0.0142162	0	0	19.8836	0	0
2104645	6.59	0	0.272727	3.826	3.67549	0.363636	91.19	0.89446	0.74355	12	0.0341762	0	0.4	1.09283	7.25487	1.01108	0.0962963	0.00532016	217.869	3.16733	1	0	0	157.284	0	143.627	0.6175	0	0.880185	1	0	11.9292	215.928	0	0.53361	0.0128757	0.480899	-0.514718	0.154201	8.03264	0.0240385	0	0	0.0143433	3	0	8.64184	9.75227	0.793701
2385855	6.74	0	0	6.358	6.223	0.461538	92.3588	0.888462	0.490355	0	0.0784749	0	0.454545	0	0	0.888462	0.190476	0	485.933	1.32218	0	0	0	0	0	135.667	0.296491	0	0.571898	0	2	0	493.477	0	0.888462	0	1.1	0.144173	9.28e-17	11.4423	0.0295139	0	0	0	0	0	34.2225	0	0
120127	7.47	0	0	4.366	3.993	0	67.3498	0.758242	0.461834	14	0.0634921	0	0.583333	1.12653	7.04017	0.758242	0.0606061	0	185	1.48336	0	0	0	120.519	4	136.921	0.323526	0	0.636493	0	0	14.7327	167.605	0	0.758242	0.0130612	0.908052	-0.0805618	5.55e-16	7.11368	0.0111111	0	0	0	0	0	6.21106	16.8274	3.30193
115297	8.47	0	0	0.839	3.71469	0.285714	76.9888	0.667924	0.776048	0	0.0519176	0	0.48	1.22888	12.6976	1.35	0.168168	0	232.034	3.22347	0	0	0	330.234	0	140.472	0.694135	0	0.776048	1	1	0.333333	220.894	0	0.534138	0.0409029	0.355844	-0.419924	0.254799	9.40699	0.0385673	2	0	0	0	1	4.69156	3.61441	3.30193
77714	0.89	0	0	-0.253	-0.3956	0.222222	28.6521	1.09688	0.748013	0	0	0	0.294118	0	0	1.77609	0.126984	0	83.3244	2.82218	0	0	1	0	0	156.219	0.690448	2	0.748013	2	0	0	56.5487	0	0.783391	0	0.445229	-0.873959	0.0506333	8.09482	0	0	0	0	0	0	0.0246804	0	0.5
383631	1.15	0	0.375	1.363	1.1118	0.875	22.7168	1.3575	0.784069	0	0.048	0	0	1.45335	0	1.20727	0.141414	0	190.453	2.63846	0	0	1	0	0	159.061	0.69299	0	0.746547	1	0	0	123.789	0	0.543859	0	0.470341	-0.488179	0.165224	9.66176	0	0	0	0	0	0	1.84878	0.5	0
60297	1.46	0	0.5	0.866	1.0428	1	21.6001	1.74408	0.530577	0	0	0	0	0	0	2.04803	0.0740741	0	113.015	1.42561	0	0	0	0	0	149.393	0.364895	0	0.530577	0	0	0.5	58.968	0	1.30264	0	1.45545	-0.214227	1.11e-16	6.85152	0	0	0	0	0	0	0.303932	0	0
111693	1.75	0	0.428571	0.228	1.59396	0.428571	27.3188	1.16472	0.625	0	0.02	0	0	1.23138	10.2016	1.28722	0.037037	0	125.145	2	0	0	0	243.314	0	145.751	0.5	0	0.5625	0	4	7.47342	133.112	0	0.91234	0.0204082	0.379394	-0.286483	2.22e-16	7.56945	0.0185185	0	0	0	0	0	0.190969	0	0
107879	1.84	0	0.4	1.007	1.3755	0.8	24.1299	1.49112	0.78891	0	0	0	0	0	0	1.59998	0.0888889	0	90.8821	1.92379	0	0	0	0	0	146.116	0.480949	0	0.78891	1	2	1	74.7309	0	1.17093	0	0.518146	-0.379341	0.0761289	7.42867	0	0	0	0	0	0	0.207754	1.41421	0
96297	2.01	0	0.2	0.681	1.2465	0.8	24.7532	1.43289	0.803599	0	0	0	0	0	0	1.53229	0.133333	0	90.3518	2.30689	0	0	0	0	0	153.724	0.590467	0	0.803599	0	1	0	44.2194	0	1.12822	0	0.384809	-0.265826	8.91e-17	7.19942	0	0	0	0	0	0	0.0158508	1	0
108930	2.15	0	0	1.329	1.3114	0.142857	20.5205	1.34055	0.504722	0	0.111111	0	0.315789	0	0	1.38476	0.0555556	0	68.2945	1.63407	0	0	0	0	0	146.507	0.384673	0	0.634376	0	6	6.08364	41.9963	0	1.22959	0	0.742521	-0.481677	0.0114498	7.06579	0	1	0	0	0	0	3.80523	3.04182	0
71410	2.27	0	0.6	1.42	1.1689	1	21.9103	1.59037	0.70337	0	0.04	0	0	0.195939	6.71846	1.66171	0.0555556	0	84.4993	1.79167	0	0	0	31.0837	0	148.827	0.429664	0	0.766719	0	3	3.96541	72.7705	0	1.40945	0	0.894703	-0.471472	2.22e-16	7.25255	0	0	0	0	0	0	1.59113	0	0
120070	2.39	0	0.384615	0.143	0.4776	0.538462	57.1595	1.12861	0.68527	6	0.0193651	0	0.214286	0.874151	7.43264	1.46562	0.0740741	0	159.183	2.83524	0	0	0	75.4364	0	149.035	0.589771	0	0.756661	0	0	12.5379	134.382	0	1.00372	0.0172595	1	-0.399436	0.07603	7.46726	0.0196759	0	0	0	1	0	0.00913936	4.58576	0
693981	2.46	0	0	0.198	0.41572	0.166667	22.9565	1.07085	0.889471	5	0	0	0.416667	0	0	1.7188	0.0634921	0	86.8523	3.02206	0	0	3	0	0	155.956	0.842981	0	0.889471	0	0	1	31.0837	0	0.875366	0	0.748498	-0.502794	0.0531282	6.71846	0	0	0	0	1	0	2.54722	1	0
109751	2.57	1	0.25	0.676	1.01227	0.25	20.895	1.12698	0.879588	0	0	0	0	0	0	1.21506	0.0740741	0	95.2231	2.64644	0	1	1	0	0	145.517	0.796658	0	0.879588	0	1	2.3811	86.9662	0	0.928231	0	0.546154	-0.288042	1.11e-16	8.27885	0	0	0	0	0	0	0.603729	0	0
6921295	2.65	0	0.333333	0.867	0.42677	0.333333	40.3272	1.03061	0.572184	0	0.0266667	0	0	0.488154	7.11763	1.41253	0.0740741	0	143.069	2.43059	0	0	0	114.737	0	146.102	0.572184	0	0.572184	0	0	6.37712	191.932	0	0.920947	0	0.692354	-0.281467	6.94e-16	7.22335	0.0277778	0	0	0	0	0	5.48824	0	0
100641	2.74	0	0	1.163	1.7807	0.125	26.7141	1.23234	0.659155	0	0.0503704	0	0.315789	0.284823	6.71846	1.271	0.0493827	0	89.1428	2.14402	0	0	0	31.0837	0	149.408	0.504722	0	0.727421	0	5	6.08364	67.0093	0	1.04385	0	0.337141	-0.222213	0.0775576	7.58729	0.0625	0	0	0	0	0	1.03287	3.04182	0
106490	2.83	0	0	0.927	1.29682	0.25	38.7876	0.944445	0.730095	6	0.151111	0	0.352941	0.863142	6.71846	0.949868	0.0888889	0	97.7266	2.74894	0	0	0	31.0837	1	148.139	0.67253	0	0.816442	0	0	3.30193	70.4277	1	1.03698	0	0.498984	-0.534915	6.66e-16	6.94336	0	0	0	0	2	0	0.42654	5.65685	0.333333
91236	2.9	0	0.181818	1.273	1.4624	0.363636	40.817	0.987395	0.803422	6	0.0456566	0	0.333333	0.396974	6.71846	1.12141	0.0952381	0	175.391	3.01688	1	0	0	31.0837	0	149.935	0.723484	0	0.910005	1	0	3.96541	132.1	0	0.620496	0	0.45961	-0.201065	0.0247608	8.15239	0.0375	0	0	0	2	0	1.25015	4.29828	1
5683330	2.98	0	0.111111	0.493	1.1476	0.333333	39.9273	1.18009	0.724142	6	0.0382222	0	0.315789	0.679586	6.71846	1.77072	0.0808081	0	122.272	2.65505	0	0	2	31.0837	0	150.352	0.625023	0	0.783055	0	0	3.96541	114.899	0	0.929919	0	0.884755	-0.370598	0.030857	7.08736	0.0625	0	1	0	1	0	0.269569	2.14914	0
111273	3.02	0	0.666667	1.989	1.559	1	24.8219	1.57588	0.64489	0	0.0266667	0	0	0.778782	7.4399	1.63345	0.0444444	0	90.8148	1.72062	0	0	0	50.7873	0	148.155	0.391733	0	0.74512	0	4	5.67624	84.4993	0	1.42062	0	0.87973	-0.458854	3.33e-16	7.17295	0.0277778	0	0	0	0	0	2.40064	0	0
619807	3.1	0	0.166667	-0.162	0.5527	0.333333	40.3949	0.76219	0.813479	6	0.0462222	0	0.333333	0.684119	11.1005	0.868212	0.111111	0	164.138	3.16993	1	0	1	177.605	1	153.991	0.760188	0	0.920063	2	0	3.30193	124.421	1	0.62735	0.0408163	0.422676	-0.682847	3.33e-16	8.25257	0.0722222	0	0	0	2	0	0.618268	7.06555	1.31037
76222	3.14	0	0	2.127	2.4017	0.25	43.7625	1.20918	0.684307	0	0.037037	0	0.259259	0	0	1.25356	0.179894	0	96.5541	2.13434	0	0	0	0	0	142.787	0.448872	0	0.779839	1	3	1.65096	36.1139	0	1.05866	0	0.458081	-0.358555	0.0569306	6.99034	0	1	0	0	0	0	0.939542	3.96541	0.5
100470	3.21	0	0	1.09	1.55828	0	35.9343	0.806816	0.618246	6	0.0503704	0	0.461538	0.252214	0	0.843285	0.0493827	0	135.435	1.91434	0	0	0	0	1	139.756	0.517328	0	0.776432	0	0	7.73232	111.974	0	0.715428	0	0.420736	-0.307342	0.0775576	7.64716	0.0625	0	0	0	1	0	1.54381	3.96541	0
108463	3.25	0	0	0.654	1.0978	0.25	34.1668	0.77589	0.699829	6	0.0740741	0	0.428571	0	0	0.81364	0.0666667	0	106.068	2.23593	0	0	0	0	0	146.451	0.587265	0	0.849915	0	0	3.53278	72.3088	0	0.866129	0	0.604771	-0.566981	3.89e-16	8.03059	0	0	0	0	2	0	0.0768398	5.11154	0.5
22726007	3.33	0	0.1	0.374	1.548	0.3	44.7114	0.63559	0.8125	6	0.0660317	0	0.375	0.714697	6.71846	0.790228	0.0854701	0	182.263	2.875	0	0	1	31.0837	1	146.585	0.71875	0	0.96875	1	0	3.53278	145.502	1	0.47748	0	0.447307	-0.745956	0.0440003	8.0072	0.03125	0	0	0	2	0	1.05206	6.44742	1.65096
619249	3.39	0	0.0909091	0.674	1.32548	0.181818	39.152	0.773958	0.863489	6	0.0558025	0	0.4	0.13709	0	0.804654	0.0793651	0	173.932	2.84022	1	0	0	0	1	148.215	0.726978	0	1	1	0	4.94145	188.252	0	0.512333	0	0.408334	-0.30194	0.0133388	9.037	0.0497685	0	0	0	2	0	2.11935	6.2612	0.5
529191	3.42	0	0	1.482	1.5863	0.111111	40.2163	0.888695	0.738205	6	0.0524444	0	0.375	0.0659861	0	0.923066	0.10101	0	142.963	2.70282	0	0	0	0	2	140.617	0.675705	0	0.894455	0	0	5.08568	85.9506	0	0.798791	0	0.374253	-0.302875	0.0850147	7.3768	0.0625	0	0	0	2	0	2.85238	5.67624	1
88744	3.46	0	0.1	1.399	1.036	0.3	37.7233	0.784051	0.75	6	0.0377778	0	0.375	5.68e-05	0	0.86329	0.102564	0	144.282	2.75	1	0	0	0	0	155.732	0.6875	0	0.84375	1	0	3.96541	95.8101	1	0.673196	0	0.39924	-0.477964	0.0515001	8.43276	0.0625	0	0	0	2	0	0.1764	4.29828	1
96139	3.49	0	0.4	1.581	1.1371	1	32.5851	0.757269	0.907019	0	0	0	0	0	0	1.24366	0.133333	0	105.66	2.45083	0	0	0	0	0	147.617	0.683641	0	0.907019	0	1	0.5	70.0114	0	0.529291	0	0.960206	-0.411367	1.11e-16	7.26019	0	1	0	0	0	0	1.66436	2	0
107051	3.54	1	0.333333	1.39	1.33739	0.666667	20.475	1.05613	0.859793	0	0	0	0	0	0	1.46782	0.111111	0	62.4429	2.41938	0	1	1	0	0	145.653	0.76323	0	0.748682	0	0	1	0	0	0.55306	0	0.998962	-0.293521	2.22e-16	0	0	0	0	0	0	0	2.14154	0	0
2759286	3.57	0	0.142857	0.559	0.7523	0.142857	59.4947	1.12346	0.656701	6	0.0302222	0	0.448276	1.14456	7.11972	1.50644	0.0261438	0	119.663	2.63596	0	0	0	106.073	1	148.464	0.542604	1	0.781697	0	0	14.7579	131.368	0	1.01232	0.00979592	1.31807	-0.195831	1.67e-16	7.16321	0.00138889	0	1	0	1	0	0.737194	4.7451	0
107982	3.64	0	0.4	-0.229	0.0136	1	23.8892	1.61681	0.82016	0	0	0	0	0	0	2.00275	0.0888889	0	75.6174	2.21692	0	0	0	0	0	151.794	0.554229	0	0.82016	0	1	0	87.8806	0	1.15128	0	1.06669	-0.379606	0.0761289	7.56864	0	1	0	0	0	0	0.2496	1	0
771608	3.69	0	0	0.904	1.9643	0.5	35.1446	0.605577	0.617948	6	0.0755556	0	0.428571	0.912269	0	0.901536	0.148148	0	178.455	2.00598	0	0	0	0	0	164.331	0.526869	0	0.76071	0	0	0	120.872	1	0.573654	0	0.978053	-0.212258	1.67e-16	11.1648	0	0	0	0	6	0	0.0596825	0	9.12547
2232088	3.73	0	0.125	0.665	1.66201	0.1875	62.0916	0.966423	0.838454	11	0.0392901	0	0.48	1.33773	7.87519	1.4883	0.115942	0	171.599	3.2676	0	0	2	125.681	1	144.216	0.70364	0	0.907362	2	0	6.77558	172.596	0	0.809234	0.0166994	0.609944	-0.50737	0.0710961	7.80717	0.0289583	0	0	0.015625	2	0	0.485809	5.98999	0.333333
23060142	3.77	0	0.583333	0.962	0.8011	0.833333	49.128	1.29719	0.738984	0	0.0369231	0	0	1.2742	7.84651	1.58447	0.111111	0	180.111	2.60282	0	0	2	106.418	0	146.237	0.5474	0	0.770141	2	2	0.685007	154.201	0	0.92295	0.0174927	0.551081	-0.591049	0.0335389	8.19111	0.0222222	1	0	0.0123457	0	0	0.831562	3.79021	1.65096
570241	3.8	0	0.0909091	1.58	1.68062	0.363636	42.0053	0.880576	0.832615	6	0.0573333	0	0.315789	7.34e-05	0	0.941247	0.118519	0	146.906	3.28663	1	0	0	0	1	153.934	0.773702	0	0.916307	1	0	2.3811	95.01	1	0.72699	0	0.366421	-0.481354	0.0648631	7.89419	0.03125	0	0	0	3	0	0.750649	4.58576	2.3811
97530	3.84	1	0.25	2.223	2.55628	0.416667	52.8865	1.03096	0.877228	6	0.0521212	0	0.25	1.04314	7.32605	1.15137	0.0888889	0	155.279	3.17353	0	1	1	87.1813	1	144.613	0.692161	0	0.902263	0	1	4.55655	135.365	0	0.911481	0.0304082	0.771181	-0.432194	0.14415	7.53801	0.0376984	0	0	0	3	0	1.38016	7.67819	1.65096
1119400	3.85	0	0.6	0.29	0.5027	0.8	35.9868	1.40048	0.658697	0	0.0228571	0	0	0.803354	7.43013	1.85074	0.10101	0	137.444	2.21836	0	0	2	103.288	0	148.396	0.490402	0	0.658697	2	3	2.3811	117.623	0	0.831912	0.0204082	0.577786	-0.614504	2.22e-16	7.85511	0.037037	0	0	0	0	0	0.038416	3.30193	0.25
618859	3.91	0	0.153846	1.642	1.24902	0.384615	41.6732	0.903445	0.758275	6	0.0695238	0	0.315789	8.28e-05	0	0.938111	0.0864198	0	158.53	3.0761	2	0	0	0	1	153.964	0.724142	0	0.817188	2	0	1.5	187.264	0	0.517848	0	0.362622	-0.193546	1.11e-16	9.23566	0.0393519	0	0	0	3	0	5.182	6.24025	1.5
271896	3.93	0	0	1.313	2.4328	0	40.2428	0.80437	0.733639	9	0.0243056	0	0.6	0	0	0.939181	0.0683761	0	152.733	2.09893	0	0	1	0	1	139.986	0.537238	0	0.931745	0	0	6.86172	77.1543	0	0.682841	0	1.01339	-0.304499	0.0544771	7.14744	0	0	0	0	0	0	0.306584	6.66899	1
111717	3.98	1	0.714286	2.863	2.1557	0.857143	28.3882	1.49321	0.645747	0	0.02	0	0	0.825622	7.41296	1.57141	0.037037	0	99.8754	1.90917	0	0	1	78.2915	0	145.611	0.42812	0	0.72729	1	5	7.47342	96.6051	0	1.24448	0.0204082	0.59565	-0.200298	2.22e-16	7.18074	0.0185185	0	0	0	0	0	1.58332	0	0
24544045	4.03	0	0.153846	2.833	4.62389	0.538462	60.601	1.17343	0.58891	6	0.0408333	0	0.1875	0.809723	6.91805	1.17395	0.111111	0	144.506	2.5996	0	0	0	72.9102	2	146.361	0.51992	0	0.631128	0	0	2.3811	117.827	1	1.20542	0	0.539644	-0.559815	6.66e-16	7.22909	0.0590278	2	0	0	3	0	0.924098	6.55185	5.67624
119619	4.09	0	0.133333	2.266	2.9176	0.133333	64.8174	0.826033	0.466289	12	0.0273016	0	0.541667	1.08401	7.064	0.849227	0.0701754	0	183.82	1.73336	0	0	0	134.947	2	138.388	0.378052	0	0.640948	1	0	13.9953	202.921	0	0.744327	0.00979592	0.658499	-0.29563	4.16e-16	7.64348	0.0115741	0	0	0	2	0	4.63024	11.7705	2.3811
104132	4.17	0	0.272727	2.529	2.6114	0.454545	49.8728	1.10924	0.764712	6	0.0488889	0	0.230769	1.19749	7.07797	1.11048	0.0683761	0	120.636	2.83393	0	0	0	91.0157	1	146.826	0.602907	0	0.862902	0	3	8.56995	116.45	1	1.15496	0.0253061	0.537523	-0.505311	0.15276	7.02395	0.0243056	0	0	0	2	0	0.203581	7.17834	0.333333
123660	4.21	0	0.666667	2.624	2.1298	0.888889	35.4649	1.50354	0.713451	0	0.0228571	0	0	0.878173	7.52412	1.7166	0.0740741	0	124.328	1.9791	0	0	1	99.3549	0	146.83	0.421045	0	0.823995	1	4	4.32964	112.406	0	1.12465	0.0102041	0.497369	-0.616814	0.0701447	7.54591	0.0222222	0	0	0	0	0	0.266566	2.30527	0
94815	4.26	0	0.333333	1.712	3.16712	0.533333	60.2931	0.975323	0.884776	6	0.0471795	0	0.214286	0.940961	7.50633	1.22062	0.0818713	0	158.771	3.44882	0	0	1	150.299	1	144.643	0.717404	0	0.920101	1	2	5.1095	152.475	0	0.628481	0.0203175	0.423922	-0.592363	0.202049	7.803	0.0201389	0	0	0.00872386	3	0	1.29095	8.84161	1.78549
106489	4.32	0	0	1.312	2.0456	0.25	37.2775	0.690297	0.750549	6	0.151111	0	0.461538	0.142858	0	0.837923	0.0888889	0	124.489	2.46967	0	0	0	0	0	142.908	0.667399	0	0.8337	0	0	3.30193	94.8843	0	0.52886	0	0.587726	-0.574284	1.11e-16	7.78152	0	0	0	0	2	0	1.46168	5.65685	0.333333
95512	4.35	0	0	0.901	1.9222	0.25	39.2218	0.690649	0.73735	6	0.111111	0	0.428571	0	0	0.838704	0.111111	0	124.991	2.52164	0	0	0	0	0	148.444	0.662308	0	0.887436	0	0	3.96541	66.3355	1	0.549565	0	0.652835	-0.593928	5.55e-17	7.23485	0	0	0	0	2	0	0.331085	4.29828	1
26896184	4.39	0	0.6	3.1	1.9036	1	38.6727	1.49424	0.612685	0	0.0342857	0	0	0.921115	7.3107	1.56588	0.0606061	0	92.9084	1.9649	0	0	0	95.4413	0	148.254	0.396613	0	0.719888	0	5	5.67624	100.369	0	1.32734	0.0163265	0.575178	-0.630388	7.22e-16	7.21366	0.0277778	2	0	0	0	0	1.23632	3.83852	0.166667
1126790	4.42	0	0.363636	2.617	2.8655	0.454545	48.3367	1.17007	0.714725	6	0.0215873	0	0.24	1.15998	7.02686	1.28125	0.037037	0	129.105	2.49391	0	0	0	117.73	0	143.662	0.537035	0	0.831952	0	2	10.0199	134.68	0	1.02302	0.0120816	1.10265	-0.294861	0.176942	7.31656	0.0150463	0	0	0.0204082	1	0	0.0837524	3.94154	0
126738	4.45	0	0.75	3.36	3.5646	0.9375	60.311	1.53915	0.538609	0	0.0266667	0	0	1.33612	7.714	1.90841	0.0740741	0	127.426	1.86497	0	0	0	122.961	0	146.668	0.341605	0	0.588564	1	6	8.99301	144.96	0	0.989117	0.00680272	0.547963	-0.967672	2.22e-16	8.11661	0.0185185	0	0	0.00823045	0	0	2.68304	0	0
52686	4.51	0	0.363636	0.527	1.5145	0.909091	47.5918	0.971903	0.719284	0	0.0342857	0	0	0.0914303	0	2.0775	0.156863	0	184.292	2.90161	0	0	0	0	0	148.865	0.671369	0	0.719284	1	0	0	158.027	0	0.628144	0	0.936823	-0.576638	0.0153406	7.93871	0	1	0	0	0	0	1.53314	0	0
5465656	4.56	0	0.153846	1.405	1.70159	0.384615	48.44	0.80092	0.882174	6	0.052381	0	0.315789	0.649235	9.31651	0.93112	0.111111	0	203.667	3.49716	1	0	0	96.3961	1	146.945	0.823262	0	0.941087	2	0	1.65096	159.384	0	0.480778	0	0.442197	-0.276164	0.0483912	8.19403	0.0648148	0	0	0	3	0	2.35899	7.06555	2.94168
80546	4.61	1	0.266667	4.112	3.3616	0.533333	68.045	1.1832	0.633619	6	0.0414815	0	0.171429	0.849113	7.29942	1.21428	0.0952381	0	120.909	2.60891	0	0	1	142.437	2	142.598	0.508631	0	0.73241	1	1	5.95724	127.142	0	1.07295	0.0278571	0.582544	-0.194352	0.108756	7.10827	0.0429293	1	0	0.010582	2	0	8.95206	9.23172	0.965489
607818	4.66	0	0.444444	2.863	1.9715	0.555556	70.6763	1.15251	0.710536	6	0.0378744	0	0.166667	0.961767	7.93137	1.36518	0.0808081	0	178.834	2.9109	0	0	2	144.283	1	144.383	0.563044	0	0.762168	2	1	8.42936	176.574	0	0.836609	0.00979592	0.567817	-0.466413	0.028269	7.79788	0.0220411	1	0	0.00935824	1	0	3.63856	10.5222	3.30193
141037	4.71	0	0.733333	2.632	2.4532	0.866667	54.55	1.43255	0.641413	0	0.0342857	0	0	1.24384	7.77898	1.70683	0.0694444	0.00413223	130.848	2.13984	0	0	2	122.922	0	146.754	0.407749	0	0.68153	2	6	6.99169	134.308	0	0.99843	0.0102041	0.511956	-0.595143	6.11e-16	7.89426	0.0198413	0	0	0.00925926	0	0	1.29687	5.05461	0.333333
329715	4.74	0	0.153846	2.027	0.9266	0.384615	38.9967	0.734518	0.816442	6	0.052381	0	0.352941	0.147579	13.3517	0.846211	0.111111	0	174.582	3.05748	2	0	0	216.391	0	157.511	0.748013	0	0.913653	2	0	1.65096	144.45	0	0.538972	0.0408163	0.495133	-0.390673	0.0287899	9.55573	0.0515873	0	0	0	3	0	1.60504	5.8538	1.65096
80466	4.8	0	0.166667	3.287	3.0798	0.5	55.3164	1.14136	0.669188	6	0.0422222	0	0.214286	0.941618	8.03904	1.15515	0.130719	0	124.618	2.70705	0	0	0	87.3219	1	143.932	0.563105	0	0.790019	0	1	4.25141	95.4444	0	1.10711	0.0202041	0.467881	-0.53432	0.0428109	6.98246	0.0636574	0	0	0	2	0	3.48121	6.01988	0.333333
105997	4.85	0	0.764706	3.348	3.2334	0.882353	60.3732	1.44046	0.614806	0	0.025	0	0	1.12683	7.55001	1.67769	0.0617284	0.00619835	127.051	2.05668	0	0	2	123.59	0	146.418	0.37672	0	0.693983	2	8	10.4985	130.913	0	1.04418	0.0116618	0.50282	-0.613043	9.44e-16	7.78537	0.0148148	0	0	0.00740741	0	0	2.94054	5.68519	0.2
620882	4.91	0	0.176471	2.169	3.74689	0.235294	65.4038	0.843743	0.609943	12	0.0382222	0	0.52	1.0454	7.37219	0.902604	0.0606061	0.0123457	182.583	2.28151	1	0	0	159.884	0	144.84	0.491296	0	0.821227	1	0	11.3306	205.333	0	0.614053	0.0145455	0.396249	-0.384717	0.00285209	7.84662	0.0192308	0	0	0.0123457	3	0	3.89036	10.1705	0.965489
95829	4.99	0	0	1.478	2.5756	0.333333	43.938	0.56822	0.798231	6	0.103333	0	0.428571	0	0	0.815547	0.111111	0	160.218	2.69951	0	0	0	0	0	147.937	0.709026	0	0.887436	0	0	1.65096	129.332	1	0.491105	0	0.603517	-0.627568	0.0232586	8.08439	0	0	0	0	3	0	0.891325	5.8538	1.65096
112129	5.06	0	0.727273	4.421	3.7161	0.909091	41.5995	1.49541	0.546623	0	0.02	0	0	0.923859	7.11243	1.54545	0.040404	0	105.41	1.62396	0	0	0	101.992	0	145.151	0.319209	0	0.663308	1	8	11.2406	104.568	0	1.32345	0.0136054	0	-0.300638	0.0526902	7.07977	0.015873	0	0	0.0123457	0	0	4.76898	2.1252	0
619158	5.15	0	0.153846	1.431	1.86562	0.384615	41.6732	0.903445	0.783055	6	0.052381	0	0.315789	0.0799626	13.3517	0.938111	0.111111	0	167.486	3.0761	2	0	0	216.391	1	153.964	0.724142	0	0.866748	2	0	1.65096	129.601	0	0.517848	0.0408163	0.368095	-0.276028	0.0287899	8.808	0.0515873	0	0	0	3	0	5.182	5.8538	1.65096
112425	5.22	0	0.818182	4.834	3.5095	1	39.3799	1.54209	0.454833	0	0.01	0	0	0.937142	7.08497	1.57095	0.0222222	0.00826446	102.093	1.48739	0	0	0	97.4627	0	146.523	0.287701	0	0.567894	0	9	15.1596	100.92	0	1.45092	0.00680272	0.857178	-0.411524	0	7.06151	0.00793651	0	0	0.00617284	0	0	8.93651	0	0
106376	5.28	0	0	2.322	3.2116	0.25	46.0242	0.572058	0.535095	6	0.151111	0	0.5	0	0	0.771019	0.0888889	0	183.683	1.9183	0	0	0	0	0	136.609	0.535095	0	0.535095	0	0	3.30193	255.192	0	0.494072	0	1.23228	-0.538115	1.11e-16	7.93296	0	0	0	0	2	0	5.33056	5.65685	0.333333
2402791	5.34	0	0	2.636	3.6952	0.4	46.5816	0.525591	0.947443	6	0.100741	0	0.545455	0	0	1.27264	0.126984	0	354.802	2.55034	0	0	2	0	0	142.881	0.737214	0	1	0	0	0	503.971	0	0.633388	0	1.30205	-0.524061	6.11e-16	12.0756	0	0	1	0	4	0	7.22642	2.82843	3.30193
58138082	5.39	0	0.176471	3.407	4.6381	0.470588	71.653	0.645954	0.812482	6	0.0607005	0	0.391304	0.867026	9.64802	1.12364	0.0694444	0	245.242	3.38162	0	0	0	332.063	1	140.691	0.747557	0	0.858183	0	1	3.53953	222.484	0	0.471425	0.0431746	1.04587	-0.447085	0.0434987	8.29805	0.0304412	0	0	0	3	0	8.51472	7.58543	1.5
3126907	5.49	0	0.5	3.435	3.6004	0.6	73.9672	1.19119	0.675421	6	0.0305314	0	0.142857	1.03321	7.47973	1.38119	0.0833333	0.00236127	152.003	2.74806	0	0	2	159.975	2	144.378	0.509626	0	0.746068	2	4	10.2198	171.634	0	0.891934	0.0121633	0.513693	-0.616805	1.36e-15	7.99084	0.0290404	0	0	0.0107371	2	0	0.0384944	11.9879	2.94168
2437254	5.63	0	0.75	5.405	4.43088	0.833333	42.8509	1.44646	0.444087	0	0.00888889	0	0	0.9218	7.0424	1.48178	0.020202	0.00550964	108.096	1.48739	0	0	0	106.31	0	145.149	0.287701	0	0.550458	0	10	17.1586	107.643	0	1.34391	0.0058309	0.37335	-0.210597	7.22e-16	7.02915	0.00694444	0	0	0.00493827	0	0	6.10683	0	0
7785708	5.69	1	0	4.177	2.92489	0.272727	44.5386	1.2037	0.785088	0	0.0888889	0	0.269231	0	0	1.2037	0.138889	0	99.6169	2.36954	0	0	0	0	1	142.396	0.504111	0	0.785088	0	2	1.65096	62.4536	0	1.2037	0	0.664973	-0.0571965	0.0516743	6.86815	0	2	0	0	0	0	2.29886	5.8538	1.65096
33878501	5.9	0	0.28	3.405	5.11889	0.44	102.397	0.903673	0.749524	12	0.0466066	0	0.341463	1.00778	7.77185	1.29484	0.0980392	0.00823045	215.413	3.29586	0	0	2	174.739	1	143.528	0.61518	0	0.889535	2	1	9.07942	211.885	0	0.545828	0.018217	0.571007	-0.553394	0.0214504	8.03277	0.0263533	1	0	0.0118922	4	0	5.86996	17.0873	7.21148
33820530	6	0	0.363636	4.706	3.9708	0.636364	79.7096	1.2225	0.680255	6	0.0511111	0	0.133333	0.994507	8.17932	1.44965	0.0888889	0	171.491	2.84755	2	0	0	118.644	1	150.67	0.518505	0	0.744998	2	2	4.84461	174.423	0	0.824178	0.0174461	0.291789	-0.142713	0.0817279	7.83343	0.0426357	1	0	0.0164609	4	0	1.75165	10.0628	5.08568
107493	6.08	0	0.625	0.292	1.4052	0.875	60.6292	1.52615	0.507032	0	0.0296296	0	0	1.37984	7.93566	2.2586	0.0952381	0	191.126	2.11652	0	0	0	107.284	0	147.93	0.406284	0	0.507032	2	0	1.14471	170.802	0	0.820015	0.0090703	0	-1.05152	4.72e-16	8.72566	0.0277778	0	0	0	0	0	1.39476	0	0
124221	6.26	0	0.833333	5.336	3.866	1	43.949	1.54149	0.440083	0	0.00888889	0	0	0.945881	7.0092	1.55071	0.020202	0.00550964	101.955	1.53904	0	0	0	98.0763	0	148.25	0.289188	0	0.544246	0	10	17.1586	100.929	1	1.53692	0.0058309	0.935319	-0.436177	7.22e-16	7.00465	0.00694444	0	0	0.00493827	0	0	12.7235	0	0
87683	6.46	0	0.111111	4.452	4.60978	0.777778	50.6964	1.25	0.578558	0	0.04	0	0	0	0	1.25	0.148148	0	482.983	1.37095	0	0	2	0	0	139.611	0.412697	0	0.578558	0	0	0	503.971	0	1.25	0	1.25	-0.24679	6.94e-16	12.0756	0	0	0	0	0	0	13.206	0	3.96541
84628	6.6	0	0.230769	2.738	5.12658	0.230769	101.666	0.837657	0.512073	18	0.0363889	0	0.578947	0.911183	7.61511	0.977652	0.0588235	0.000837	206.521	2.17935	0	0	2	221.614	2	139.992	0.415278	0	0.6891	2	0	17.9863	229.178	0	0.658882	0.0122993	0.531968	-0.583238	1.97e-15	8.50934	0.0221354	0	0	0.00781053	4	0	7.52515	20.535	5.89633
3698837	6.77	0	0.142857	2.404	3.08969	0.428571	46.8236	0.566732	0.78125	6	0.051358	0	0.375	0.0654835	0	0.804057	0.111111	0	251.352	3	2	0	0	0	0	154.879	0.75	0	0.84375	2	0	0.333333	212.549	0	0.497082	0	0.413865	-0.0395699	1.08e-15	10.2414	0.0694444	0	0	0	4	0	6.59154	5.65685	3.30193
77474	7.59	0	0	3.696	4.40468	0.545455	54.007	1	0.737214	0	0	0	0.454545	0	0	1	0.17284	0	503.971	2.1867	0	0	0	0	0	137.281	0.632099	0	0.737214	0	1	0	0	0	1	0	1.32369	-0.068472	0.03448	0	0	0	0	0	0	0	12.2346	0	4.24264
22431625	8.57	1	0.233333	5.363	5.06609	0.3	110.778	1.03127	0.793146	11	0.0377609	0	0.436364	1.20444	7.38771	1.13667	0.0944444	0.00827476	142.677	3.30957	0	0	2	133.298	3	141.793	0.572456	0	0.841922	1	5	16.3962	174.067	0	0.876197	0.0218452	0.576136	-0.386384	0.0992323	7.64646	0.0236029	2	0	0.0125275	3	0	2.33234	20.4284	5.31625
100798	0.9	0	0.111111	-0.038	0.1302	0.444444	32.7231	1.37752	0.723437	0	0.07125	0	0.238095	0.232593	6.71846	1.78109	0.0854701	0	105.02	2.29452	0	0	0	31.0837	0	149.687	0.522394	0	0.766803	0	2	0.5	75.625	0	0.957086	0	0.93015	-0.494619	0.126116	7.12359	0	1	0	0	0	0	0.453064	2	0
110883	1.18	0	0	-0.159	-0.0777	0	17.559	1.46068	0.418414	0	0	0	0.5	0	0	2.45115	0	0	48.0604	1.5	0	0	0	0	0	153.233	0.418414	0	0.418414	0	0	1.5	0	0	0.709861	0	1.54062	-0.500739	7.22e-16	0	0	0	1	0	0	0	0.198738	0	0
141435	1.47	0	0.333333	-1.275	-1.0626	1	16.2111	1.50112	0.842328	0	0	0	0	0	0	1.89062	0.111111	0	48.6107	2.55034	0	0	0	0	0	163.675	0.737214	0	0.842328	0	0	1	31.0837	1	1.30547	0	1.10841	-0.563808	2.22e-16	6.71846	0	0	0	0	0	0	1.40897	0	0
140318	1.77	0	0.222222	-1.309	-1.1497	0.333333	38.6933	1.43666	0.529491	0	0.0302222	0	0.25	0.4139	7.07855	2.10422	0.0444444	0	99.4759	1.94812	0	0	0	43.9797	0	158.03	0.424893	1	0.713649	0	0	6.67872	80.922	1	1.22831	0.04	1.0946	-0.354571	0.132149	7.16864	0.0300926	0	1	0	0	0	1.18266	0	0
78900	1.87	0	0.25	-0.882	-0.7077	1	22.453	1.5167	0.748225	0	0	0	0	0	0	1.7616	0.111111	0	51.7683	2.20624	0	0	0	0	0	163.586	0.564705	0	0.81648	0	1	0	31.0837	2	1.5034	0	0.900361	-0.62889	0.0608102	6.71846	0	1	0	0	0	0	2.21206	1	0
4214793	2.06	0	0	0.613	1.84579	0.25	33.223	0.684733	0.95351	6	0.151111	0	0.5	0.122663	0	1.18963	0.0888889	0	138.499	3.02206	0	0	2	0	0	148.201	0.842981	0	1	0	0	1.65096	107.644	0	0.513815	0	0.549315	-0.657328	2.22e-16	7.99413	0	0	1	0	2	0	1.3528	4.24264	0.333333
138863	2.15	1	0.1	3.729	3.16128	0.3	46.0152	1.25	0.74217	0	0.0637037	0	0.230769	0.580357	7.11763	1.25	0.102564	0	106.99	2.43657	0	1	1	114.737	2	142.996	0.518371	0	0.791265	0	3	3.30193	77.8109	0	1.25	0	0.624568	0.000318	0.0154558	6.88977	0.0787037	1	0	0	0	0	4.58988	7.06555	1.31037
107108	2.28	0	0.333333	0.215	0.3551	1	17.7446	1.65942	0.776432	0	0	0	0	0	0	1.75758	0.111111	0	53.4139	2.03494	0	0	0	0	0	157.032	0.549919	0	0.776432	0	1	1	31.0837	1	1.61013	0	0.957719	-0.579348	2.22e-16	6.71846	0	0	0	0	0	0	0.950625	0	0
20662844	2.4	0	0	0.874	1.19936	0.375	33.4122	1.21095	0.589429	5	0	0	0.294118	0	0	1.62862	0.10101	0	131.509	2.12957	0	0	1	0	0	148.193	0.521	0	0.794714	0	0	0	78.8854	0	0.885416	0	0.479211	-0.634607	0.0155884	6.94656	0	0	0	0	3	0	0.281112	0	1.88988
141913	2.47	0	0	0.344	0.3832	0.25	32.9367	1.43817	0.658389	0	0.0740741	0	0.285714	0	0	1.84656	0.0666667	0	95.572	2.05805	0	0	0	0	0	151.252	0.468557	1	0.658389	0	2	0.5	72.9102	0	1.13149	0	1.22676	-0.346092	6.66e-16	6.91805	0	2	1	0	0	0	0.30195	2.3094	0.5
141786	2.58	0	0.4	0.664	0.5694	0.8	21.7066	1.51229	0.784069	0	0	0	0	0	0	1.9273	0.0888889	0	150.681	2.09307	0	0	1	0	0	149.123	0.549744	0	0.746547	1	0	0	74.7309	0	0.936377	0	0.48955	-0.67285	0.0761289	7.42867	0	0	0	0	0	0	0.0737123	0.5	0
105146	2.67	0	0.6	1.072	1.6974	0.9	45.8224	1.54719	0.702633	0	0.02	0	0	0.616218	7.43159	1.93277	0.0808081	0	118.876	1.99137	0	0	0	110.815	0	148.773	0.405832	0	0.740062	1	2	4.61054	92.2281	0	1.23113	0.0272109	0.534559	-0.208484	0.0668255	7.08345	0.037037	0	0	0	0	0	0.0497736	1.83549	0
18368633	2.74	0	0	1.086	1.61471	0.25	36.7667	0.858235	0.82159	6	0.0740741	0	0.428571	0	0	1.28676	0.0666667	0	150.922	2.78845	0	0	1	0	0	144.717	0.732385	0	0.910795	0	0	2.3811	95.7129	0	0.512877	0	0.776721	-0.664378	2.22e-16	7.69588	0	0	1	0	2	0	1.50823	3.30193	0.5
920661	2.84	0	0.222222	2.388	1.4719	1	18.8317	1.20001	0.592981	0	0	0	0	0	0	1.4399	0.133333	0	135.9	2.12581	0	0	0	0	0	174.76	0.592981	0	0.509648	0	1	0	0	0	0.650283	0	0	-0.517699	2.22e-16	0	0	1	0	0	0	0	2.84091	0	0
932161	2.9	0	0.111111	1.013	1.63289	0.333333	38.5717	1.11652	0.846656	5	0.0416667	0	0.277778	0	0	1.5817	0.111111	0	148.274	2.933	0	0	1	0	0	147.577	0.70337	0	0.873302	1	0	2.3811	82.0048	0	0.839544	0	0.548336	-0.27609	0.0909731	7.4096	0	0	0	0	1	0	0.0291044	2.94168	1
769288	2.98	0	0	0.461	1.60012	0.272727	43.4343	0.916845	0.783055	6	0.0513131	0	0.315789	0.398714	8.27885	1.17592	0.103704	0	164.751	3.32636	0	0	1	86.9662	2	146.785	0.783055	0	0.882174	0	0	0.333333	116.938	0	0.795307	0	0.402546	-0.546735	0.0375279	8.07765	0.0590278	0	1	0	4	0	1.28188	4.52175	3.53278
13909734	3.02	0	0.266667	1.331	1.915	0.533333	60.4366	1.16257	0.682045	6	0.0558454	0	0.206897	1.16392	7.1942	1.48759	0.111111	0	208.096	2.74473	0	0	0	70.8061	1	145.913	0.564994	0	0.729992	1	0	1	152.007	0	0.791997	0.0136054	0.868449	-0.285488	0.000162	8.07597	0.0393519	0	0	0	4	0	0.293656	5.08568	5.67624
2439772	3.1	0	0.181818	0.072	1.29489	0.363636	43.8207	0.934457	0.806164	6	0.0456566	0	0.3	0.597378	6.71846	1.10827	0.0952381	0	177.524	3.18418	0	0	1	31.0837	1	148.919	0.736751	0	0.898715	1	0	3.96541	125.803	1	0.80624	0	0.57317	-0.550563	0.0247608	7.74283	0.0375	0	0	0	2	0	0.00553536	5.55316	2.3811
464493	3.14	0	0	2.127	2.4017	0.25	43.7625	1.20918	0.684307	0	0.037037	0	0.259259	0	0	1.25356	0.179894	0	96.5541	2.13434	0	0	0	0	0	142.787	0.448872	0	0.779839	1	3	1.65096	36.1139	0	1.05866	0	0.458081	-0.358555	0.0569306	6.99034	0	1	0	0	0	0	0.939542	3.96541	0.5
79005	3.21	0	0.25	2.158	2.0289	1	25.7097	0.697318	0.833333	0	0	0	0	0	0	1.86704	0.111111	0	0	1.81128	0	0	0	0	0	146.317	0.603759	0	0.583333	0	0	0	0	0	0.547346	0	1.03107	-0.246865	0.0608102	0	0	1	0	0	0	0	3.82398	1	0
14548460	3.25	0	0.133333	0.776	2.3126	0.133333	61.2479	0.833751	0.726972	12	0.0273016	0	0.565217	1.21408	7.24383	1.01104	0.0701754	0	190.455	2.34179	0	0	2	126.481	2	140.846	0.517687	0	0.915852	1	0	11.3306	200.267	0	0.696147	0.00979592	0.699996	-0.266641	4.16e-16	7.7463	0.0115741	0	1	0	2	0	0.218089	11.1109	2.3811
75912	3.33	0	0.2	0.851	1.2745	1	22.0651	1.56648	0.479934	0	0	0	0	0	0	1.66476	0.0952381	0	49.2716	1.91974	0	0	0	0	0	152.164	0.479934	0	0.479934	0	0	0	31.0837	0	1.1244	0	0.384671	-0.238164	0.108212	6.71846	0	0	0	0	0	0	0.979704	0	0
95545	3.39	0	0	-0.168	0.851	0.25	38.0554	0.797712	0.625	6	0.111111	0	0.375	0	0	0.86669	0.111111	0	103.61	2.25	0	0	0	0	0	155.696	0.5625	0	0.6875	0	0	3.96541	54.5772	2	1.02317	0	0.588785	-0.63997	3.89e-16	6.96675	0	0	0	0	2	0	0.9801	4.29828	1
102692	3.42	0	0.666667	2.406	2.5184	1	43.4655	1.6584	0.519381	0	0.0266667	0	0	0.820078	6.85152	1.98404	0.0740741	0	115.007	1.51861	0	0	0	58.968	0	148.91	0.306529	0	0.519381	0	3	6.37712	112.584	0	1.49598	0	1.25893	-0.0856009	6.94e-16	7.01982	0.0277778	0	0	0	0	0	0.438376	0	0
108952	3.46	0	0	0.946	1.3922	0.142857	32.5613	0.846712	0.618246	6	0.111111	0	0.461538	0	0	0.857487	0.0555556	0	91.026	1.91434	0	0	0	0	0	143.454	0.517328	0	0.776432	0	0	6.08364	53.5142	0	0.874806	0	0.604952	-0.52561	0.0114498	7.24378	0	0	0	0	1	0	0.706104	3.04182	0
631641	3.5	0	0.2	1.247	1.1869	0.8	28.2527	0.46842	0.916667	0	0	0	0	0	0	0.967652	0.148148	0	108.939	2.75	0	0	1	0	0	148.263	0.916667	0	0.791667	1	0	0	0	0	0.628062	0	0.458127	-0.631011	4.44e-16	0	0	1	0	0	0	0	1.9271	0	1
1129357	3.54	0	0.166667	0.311	1.41109	0.25	46.7026	0.907508	0.792408	6	0.0422222	0	0.315789	1.13517	7.71216	1.07694	0.103704	0	175.603	3.15557	0	0	1	117.762	2	142.626	0.742848	0	0.891527	1	0	4.88359	167.23	0	0.658656	0.0304082	0.546243	-0.545577	0.013434	8.01275	0.0543981	0	0	0	2	0	1.11958	8.04133	1.31037
109659	3.57	0	0.5	2.663	2.1814	1	25.0332	1.18332	0.685667	0	0	0	0	0	0	1.52872	0.0740741	0	95.8923	1.62669	0	0	0	0	0	145.501	0.427249	0	0.669631	0	2	2.3811	70.0114	0	0.506149	0	1.09609	-0.18717	1.11e-16	7.26019	0	0	0	0	0	0	0.14115	0	0
2074671	3.64	0	0.333333	-2.521	-1.49	0.833333	17.6913	1.16265	0.73735	0	0	0	0	0	0	1.6428	0.138889	0	72.1272	2.61058	0	0	0	0	0	153.578	0.685667	0	0.73735	1	0	0.5	43.8162	0	1.03054	0	1.04917	-0.5711	4.44e-16	7.40664	0	0	0	0	0	0	0.360961	0	0
60004	3.69	0	0.578947	-2.556	-2.0712	0.789474	62.3456	1.17101	0.591655	0	0.0369231	0	0	0.689508	7.98214	1.99261	0.0462963	0	145.563	2.75272	0	0	4	140.604	0	154.882	0.532448	0	0.591655	4	0	5.52147	140.365	0	0.81973	0.0204082	0.388129	-0.656787	1.17e-15	8.50493	0.0277778	0	0	0.0246914	0	0	2.9474	7.26848	1.03292
123159	3.73	1	0.5	2.018	1.6215	0.833333	28.9101	1.4923	0.708715	0	0.0266667	0	0	3.08e-05	0	1.58332	0.111111	0	90.4426	2.03457	0	0	1	0	0	145.821	0.478956	0	0.807835	1	2	1.65096	81.5018	0	1.21233	0	0.606217	-0.240638	0.0590165	7.25232	0	1	0	0	0	0	0.0147137	2.3811	0
31502575	3.77	0	0.384615	2.474	2.2841	0.461538	41.7887	1.20283	0.687864	0	0.0355556	0	0.206897	0.957974	7.49069	1.67545	0.0444444	0	119.674	2.43684	0	0	0	133.177	0	148.807	0.501616	1	0.776338	1	6	6.93298	128.232	0	0.686757	0.014344	0.396184	-0.766232	0.134278	8.03011	0.0118056	1	0	0.0109179	0	0	0.651088	5.20518	0.5
123864	3.81	0	0.571429	1.591	1.3496	0.857143	28.1502	1.50595	0.774293	0	0.04	0	0	1.13034	7.42867	1.78739	0.0634921	0	115.607	2.07095	0	0	1	74.7309	0	147.615	0.479173	0	0.820569	1	2	2.3811	101.333	0	1.04922	0	0.465617	-0.637496	0.0734835	7.5154	0.037037	0	0	0	0	0	0.353192	1.04004	0
554847	3.84	0	0.1	0.952	1.1594	0.3	35.779	0.78817	0.863489	6	0.0660317	0	0.4	9.63e-05	0	0.831439	0.0854701	0	141.875	2.84022	1	0	0	0	0	151.42	0.726978	0	1	1	0	3.53278	136.26	0	0.63131	0	0.455506	-0.479199	0.0440003	9.35808	0.03125	0	0	0	2	0	1.11007	5.11154	0.5
813785	3.85	0	0.333333	-1.209	-0.6004	0.833333	23.3297	1.52045	0.633983	0	0	0	0	0	0	2.53901	0.138889	0	101.392	2.4138	0	0	0	0	0	152.449	0.633983	0	0.633983	1	0	0	72.9102	0	0.821619	0	0.463287	-1.06586	4.44e-16	6.91805	0	0	0	0	0	0	0.00183184	0	0
79345	3.92	0	0.2	2.576	2.5938	1	30.7638	0.579152	0.5	0	0	0	0	0	0	1.86838	0.148148	0	0	1.5	0	0	0	0	0	145.302	0.5	0	0.333333	0	0	0	0	0	0.679133	0	1.16667	-0.264323	4.44e-16	0	0	2	0	0	0	0	5.75616	0	1
618871	3.93	0	0.153846	0.758	0.8032	0.384615	40.941	0.723131	0.70337	6	0.0695238	0	0.333333	7.64e-05	0	0.888173	0.0864198	0	160.879	2.933	2	0	0	0	0	161.005	0.70337	0	0.70337	2	0	1.5	184.991	1	0.555109	0	0.414849	-0.415672	1.11e-16	9.79475	0.0393519	0	0	0	3	0	0.401069	6.24025	1.5
108429	3.98	0	0	0.901	1.9222	0.25	39.2218	0.690649	0.774872	6	0.0740741	0	0.428571	0	0	0.838704	0.0666667	0	124.039	2.52164	0	0	0	0	0	148.444	0.662308	0	0.962479	0	0	3.53278	87.2416	1	0.549565	0	0.564847	-0.590714	3.89e-16	7.74346	0	0	0	0	2	0	0.331085	5.11154	0.5
96093	4.05	0	0.1	1.005	1.4168	0.1	39.4649	0.920329	0.70693	6	0.0242222	0	0.529412	0.628463	6.71846	1.05094	0.05	0	140.985	2.44192	0	0	0	31.0837	1	141.446	0.597418	0	0.845224	0	1	6.94563	102.842	0	0.781336	0	1.29538	-0.219931	0.0135804	7.36028	0.0225	1	0	0	1	0	1.03002	6.08555	1
109217	4.1	0	0.666667	2.413	2.1298	0.888889	36.0853	1.50354	0.697086	0	0.0228571	0	0	1.2778	7.18788	1.7166	0.0740741	0	116.472	1.9791	0	0	1	94.9867	0	146.83	0.421045	0	0.7749	1	4	3.83852	121.032	0	1.12465	0.0102041	0.511391	-0.619686	0.0701447	7.85388	0.0222222	0	0	0	0	0	0.649797	2.30527	0
83341	4.17	0	0	1.604	2.17392	0.0909091	46.2057	0.861546	0.817188	9	0.0228704	0	0.473684	0.525704	6.71846	1.03205	0.0888889	0	144.721	2.96558	0	0	1	31.0837	2	144.554	0.698125	0	0.916307	0	0	4.7451	91.0636	0	0.861902	0	0.840125	-0.347433	0.0399195	7.01368	0.0625	0	0	0	1	0	0.538462	7.38314	2.3811
70343065	4.21	0	0.142857	2.655	1.44782	0.428571	45.223	0.827308	0.810169	6	0.0422222	0	0.285714	0.224378	9.47117	0.954045	0.111111	0	177.386	3.36804	2	0	0	82.0136	1	158.625	0.766803	0	0.883402	2	0	1	120.896	1	0.593956	0	0.386113	-0.386069	0.0417482	8.88365	0.0648148	0	0	0	4	0	1.16575	4.29828	3.96541
10202923	4.26	0	0.142857	1.797	1.99422	0.428571	45.223	0.827308	0.788486	6	0.0422222	0	0.285714	0.0559917	9.47117	0.954045	0.111111	0	181.603	3.36804	2	0	0	82.0136	1	158.625	0.766803	0	0.861719	2	0	1	118.12	1	0.593956	0	0.382173	-0.416046	0.0417482	8.91506	0.0648148	0	0	0	4	0	1.16575	4.29828	3.96541
2626837	4.32	0	0.266667	2.549	3.20309	0.533333	62.6797	1.1582	0.687256	6	0.0414815	0	0.1875	0.966907	7.87542	1.40625	0.0952381	0	130.932	3.00705	0	0	0	135.538	1	146.965	0.60141	1	0.737256	1	0	3.30193	130.421	0	0.939919	0.0278571	0.374203	-0.873153	0.108756	7.32427	0.0429293	0	0	0.010582	2	0	5.45456	6.29469	0.965489
88302	4.36	0	0.142857	1.832	2.4537	0.5	40.9935	0.794453	0.873302	6	0.0711111	0	0.333333	1.0186	9.47117	0.852104	0.10582	0	190.449	3.37744	1	0	0	82.0136	1	157.418	0.809953	0	0.936651	1	0	1.65096	162.036	0	0.531008	0	0.463592	-0.547907	0.0292461	11.1116	0.0282407	0	0	0	3	0	3.82633	5.8538	1.65096
100447	4.4	0	0.125	1.867	2.0859	0.25	40.0635	0.847256	0.652502	6	0.0503704	0	0.4	0.047849	0	0.99043	0.0493827	0	129.525	2.22561	0	0	0	0	1	140.363	0.569662	0	0.782352	0	0	7.73232	103.586	0	0.540764	0	1.05883	-0.0915389	0.0775576	7.43504	0.0625	0	0	0	1	0	3.85612	3.96541	0
1194656	4.42	0	0	1.611	2.86508	0.2	45.3667	0.601522	0.776432	6	0.0466667	0	0.461538	0.283859	0	0.821791	0.119658	0	253.059	2.66123	0	0	0	0	1	138.663	0.719165	0	0.875275	0	0	2.94168	143.334	0	0.467716	0	0.411397	-0.215143	0.0875308	8.41008	0.0625	0	0	0	3	0	3.92	6.44742	2.3811
103651	4.46	0	0.222222	3.507	2.6391	0.333333	43.4114	1.11111	0.705986	6	0.0302222	0	0.285714	0.891204	6.85152	1.11111	0.0444444	0	124.295	2.35085	0	0	0	58.968	1	141.839	0.535219	0	0.810169	0	2	9.56307	117.73	0	1.11111	0.04	0.973463	-0.022427	0.132149	7.02686	0.0300926	0	0	0	1	0	1.06812	4.44554	0
333415	4.51	0	0.368421	2.864	4.3408	0.631579	80.3776	1.20725	0.700417	6	0.0404938	0	0.15	1.2809	7.39982	1.62448	0.0769231	0	186.597	2.81096	0	0	2	123.078	0	147.041	0.528185	0	0.756787	0	0	0.64633	191.679	0	0.618707	0.0243673	0.78421	-0.821829	0.0483613	8.1203	0.0304952	1	1	0.0139582	3	0	3.62255	3.08087	2.94168
17754904	4.56	1	0.285714	2.158	2.01929	0.5	59.8418	1.12115	0.77098	6	0.0433333	0	0.206897	0.739123	7.61198	1.44964	0.111111	0	166.474	3.13473	0	0	1	113.58	1	147.162	0.645275	0	0.804731	1	0	5.11918	119.776	0	0.926949	0.0230904	0.596258	-0.355278	0.0197865	7.30054	0.0465278	0	0	0	3	0	0.524321	8.58404	1.65096
106467	4.62	0	0	1.97	2.9934	0.25	40.3882	0.646296	0.535095	6	0.151111	0	0.5	0	0	0.899437	0.0888889	0	162.146	1.9183	0	0	0	0	0	138.775	0.535095	0	0.535095	0	0	3.30193	188.713	0	0.458532	0	0	-0.542193	1.11e-16	8.50418	0	0	0	0	2	0	4.58302	5.65685	0.333333
88040	4.66	0	0	1.674	2.10164	0.4	45.8415	0.870034	0.708715	6	0.0749206	0	0.315789	0.00664557	0	1.0096	0.111111	0	143.939	3.01057	0	0	0	0	2	143.362	0.708715	0	0.733495	0	0	0.5	115.535	0	0.601413	0	0.467694	-0.576678	0.0319804	7.93852	0	0	0	0	4	0	4.41756	5.11154	3.53278
84833	4.71	2	0.0625	2.209	2.95008	0.25	67.1479	1.03128	0.7563	6	0.0383333	0	0.3	0.507114	7.37241	1.3006	0.12037	0	170.383	2.98527	0	0	1	77.7391	1	143.958	0.608382	0	0.835166	1	0	5.41659	131.414	0	0.868934	0.0138889	0.568964	-0.219	0.139368	7.24256	0.0289583	0	0	0	2	0	2.28796	7.56522	1.88988
89985	4.75	1	0.111111	1.218	2.1525	0.222222	40.7458	0.752875	0.774872	6	0.0524444	0	0.428571	6.91e-05	0	0.919712	0.10101	0	164.492	2.40667	0	0	1	0	1	139.467	0.63211	0	0.924957	1	0	5.08568	101.627	0	0.486897	0	0.738829	-0.222802	0.0850147	8.04156	0.0625	0	0	0	2	0	1.91573	5.67624	1
148538	4.8	1	0.181818	1.018	1.71409	0.363636	44.2786	0.938306	0.882174	6	0.0493333	0	0.315789	0.968947	7.63603	1.1267	0.111111	0	167.452	3.2211	0	0	1	48.0604	1	145.157	0.758275	0	0.941087	1	0	3.14735	116.732	0	0.755893	0	0.800847	-0.371994	8.88e-16	7.98531	0.0451389	0	0	0	3	0	0.00214369	6.23321	2.3811
102772	4.86	0	0.111111	0.547	1.91199	0.111111	74.7638	0.868401	0.777127	9	0.0248889	1	0.571429	1.22027	7.47819	1.25348	0.037037	0	187.047	3.23593	0	0	0	201.946	0	143.79	0.67312	0	0.83656	0	0	7.43703	191.205	0	0.672576	0.0146977	1.41044	-0.287433	0.09573	7.64941	0.0189957	0	1	0.00487371	1	0	4.62078	7.31525	1.88988
5267276	4.91	0	0.142857	1.797	1.44782	0.428571	45.223	0.827308	0.810169	6	0.051358	0	0.285714	0.280345	9.47117	0.954045	0.111111	0	168.914	3.36804	2	0	0	82.0136	1	158.625	0.766803	0	0.861719	2	0	0.333333	127.296	1	0.593956	0	0.378233	-0.414665	1.33e-15	8.83396	0.0694444	0	0	0	4	0	1.16575	5.65685	3.30193
109648	4.99	0	0.5	2.774	2.1663	1	29.5342	0.820381	0.632099	0	0	0	0	0	0	1.32728	0.0740741	0	157.69	1.68582	0	0	0	0	0	143.838	0.48731	0	0.54119	0	1	2.3811	0	0	0.523283	0	1.28718	-0.128409	1.11e-16	0	0	0	0	0	0	0	2.28856	0	0
300765	5.06	0	0.416667	2.266	2.6712	0.916667	58.2459	0.880853	0.751155	0	0.0733333	0	0	0.773199	8.78602	2.10507	0.135802	0	206.551	2.80161	0	0	0	132.73	0	146.737	0.648231	0	0.719284	1	0	0	248.029	0	0.57119	0	0.637702	-0.880445	0.00445944	9.03256	0.025641	1	0	0	0	0	8.26735	0	0
2499958	5.15	1	0.7	3.021	2.22209	0.8	38.6211	1.40085	0.729285	0	0.0228571	0	0	0.8891	7.48972	1.58456	0.0666667	0	117.724	2.50079	0	1	2	112.966	0	146.06	0.525941	0	0.822756	1	4	6.10059	117.959	0	1.0756	0.0163265	0.492875	-0.662892	0.0880345	7.35744	0.0185185	0	0	0.00823045	0	0	0.335704	2.00415	0
653372	5.25	1	0.0769231	1.01	2.1946	0.461538	36.6686	0.83891	0.655469	6	0.0691667	0	0.428571	0.853253	0	0.841505	0.140351	0	221.162	2.14883	0	0	1	0	1	155.354	0.56439	0	0.798231	1	0	0	176.134	0	0.543743	0	1.08076	-0.047766	0.0772449	12.2337	0.0196759	0	0	0	6	0	0.318547	2.62074	9.12547
5989275	5.28	1	0.1	3.729	3.16128	0.3	46.0152	1.25	0.74217	0	0.0637037	0	0.230769	0.580357	7.11763	1.25	0.102564	0	106.99	2.43657	0	1	1	114.737	2	142.996	0.518371	0	0.791265	0	3	3.30193	77.8109	0	1.25	0	0.624568	0.000318	0.0154558	6.88977	0.0787037	1	0	0	0	0	4.58988	7.06555	1.31037
29091052	5.35	0	0.272727	3.876	3.4901	0.636364	68.3622	1.0465	0.76037	6	0.0559012	0	0.171429	0.618048	8.42223	1.13265	0.10101	0	206.873	3.47288	2	0	0	104.995	1	159.514	0.677069	0	0.786856	2	0	0.944941	170.989	1	0.591232	0.0092828	0.346688	-0.450684	0.0285689	8.63353	0.0544251	0	0	0	5	0	3.26742	5.79836	6.08364
57055386	5.41	0	0.12	5.328	4.9646	0.32	94.7118	1.07671	0.751804	6	0.0494057	0	0.28	0.857317	7.22809	1.21403	0.131054	0.00661157	169.105	2.90268	0	0	1	128.729	3	142.366	0.514308	0	0.861727	1	5	9.12534	141.543	0	0.746973	0.0272937	0.486442	-0.427458	0.15048	7.42325	0.0366753	2	0	0.0186903	3	0	5.98292	16.7051	4.77054
1746232	5.52	1	0.166667	4.709	3.44439	0.416667	57.7896	1.125	0.621905	6	0.0462222	0	0.214286	0.621711	7.19226	1.125	0.104575	0	120.842	2.50216	0	1	1	169.227	2	141.839	0.520487	0	0.693296	0	0	4.88359	104.558	0	1.125	0.0306122	0.567544	-0.236326	0.0882674	6.98434	0.0833333	0	0	0	2	0	10.7315	6.59754	0.333333
101553	5.64	0	0.133333	2.705	4.74219	0.2	69.7203	0.748827	0.53356	12	0.0448485	0	0.565217	1.13515	7.18698	0.922583	0.0467836	0	190.035	1.95579	0	0	0	165.738	0	139.14	0.432357	0	0.742845	0	0	11.3306	221.732	0	0.4622	0.0177778	0.902985	-0.440859	1.39e-16	7.46157	0.00631313	0	0	0.0123457	3	0	4.89206	10.1705	0.965489
2176627	5.73	0	0	3.213	4.3486	0.454545	51.2978	0.752053	0.875048	6	0.0795062	0	0.545455	0	0	1.29784	0.138889	0	468.227	1.97175	0	0	2	0	0	142.236	0.569963	0	1	0	0	0	503.971	0	0.858032	0	1.34683	-0.330192	1.05e-16	12.0756	0	0	1	0	5	0	9.34464	0	6.08364
95318	5.9	0	0.1875	2.008	2.02029	0.375	74.1984	0.897405	0.692761	9	0.0540171	1	0.310345	1.26675	7.26196	1.13086	0.057971	0	127.465	3.15853	0	0	0	180.836	0	144.03	0.650172	1	0.749547	0	0	3.96541	232.8	0	0.733867	0.0385488	0.738183	-0.562197	0.134887	7.66848	0.0185185	0	0	0.015625	1	0	8.16416	5.24148	1.88988
608935	6.01	0	0	3.701	4.9536	0.454545	54.5368	0.463425	0.497679	6	0.0795062	0	0.5	0	0	0.901747	0.138889	0	390.91	1.65002	0	0	0	0	0	136.999	0.460262	0	0.610529	0	0	0	377.701	0	0.681699	0	1.12586	-0.125296	1.05e-16	11.0528	0	0	0	0	5	0	10.5424	3.04182	6.08364
1757182	6.14	1	0.35	5.439	5.33259	0.6	92.4252	0.886053	0.778783	6	0.0457778	0	0.176471	1.17895	7.67914	1.31913	0.0987654	0	257.073	3.36014	0	0	1	170.08	1	142.553	0.660474	0	0.817835	0	0	3.43157	236.221	0	0.478688	0.0195578	1.03151	-0.705456	0.0676878	8.61304	0.0282738	0	0	0.011489	3	0	14.1865	8.94236	3.30193
18292972	6.28	0	0.1875	1.648	1.63282	0.4375	44.8909	0.868519	0.750435	6	0.0540171	0	0.285714	0.0547573	13.3517	0.951466	0.10628	0	205.328	3.06973	3	0	0	216.391	1	158.653	0.698885	0	0.823668	3	0	1	148.366	0	0.447162	0.0204082	0.414167	-0.0153663	0.032877	9.62577	0.0416667	0	0	0	4	0	6.19861	4.29828	3.96541
28553120	6.47	0	0.6	8.792	7.2132	0.733333	111.588	1.30201	0.579124	6	0.0311111	0	0.0833333	0.980826	7.43367	1.42565	0.0802469	0.00539976	130.313	2.43881	0	0	2	146.721	2	144.365	0.395273	0	0.689265	2	10	19.1331	142.839	0	1.07158	0.0167587	0.488921	-0.553562	5.55e-16	7.56232	0.0211988	2	0	0.00872386	2	0	0.325128	19.0534	5.00829
732263	6.63	0	0.157895	5.84	5.65529	0.684211	86.2814	1.27929	0.390572	6	0.0529032	0	0.122449	1.41019	7.19053	1.29034	0.118056	0	124.371	2.13673	0	0	0	105.36	3	144.11	0.380559	0	0.407855	0	0	0.5	147.099	0	1.24354	0	0.39454	-0.574871	0.0528303	7.40014	0.0796131	0	0	0	4	0	24.2271	5.11154	3.53278
37680652	6.88	0	0.0625	3.328	5.3622	0.25	73.62	0.636905	0.585444	12	0.0530864	0	0.545455	1.1363	7.63582	0.82474	0.0909091	0	256.413	2.14976	0	0	0	136.097	2	137.315	0.482071	0	0.801139	0	0	6.92631	265.107	0	0.456896	0.0200454	1.07848	-0.418541	0.0118318	8.06818	0.0225694	0	0	0	3	0	12.4024	13.9212	5.08568
72435	7.61	0	0.227273	3.382	5.1892	0.454545	97.2703	0.845683	0.633217	12	0.0463889	0	0.361111	0.87363	8.10317	1.16571	0.0860215	0.0137401	225.463	2.93641	0	0	0	198.345	2	141.897	0.56798	0	0.719184	0	0	8.6919	192.588	0	0.507632	0.0363265	1.21358	-0.351813	1.06e-15	7.70849	0.0233135	1	0	0.00329218	4	0	9.43903	15.6241	3.34163
70124775	9.35	0	0.285714	3.717	6.78767	0.4	131.054	0.954542	0.711019	18	0.0336383	0	0.410714	0.840498	7.57112	0.962978	0.0614657	0.00764472	188.401	3.26833	0	0	1	184.465	2	143.467	0.562791	0	0.85279	1	1	17.0666	193.972	0	0.684446	0.0247619	0.529018	-0.520184	0.00890402	8.05714	0.0214002	4	0	0.0112457	5	0	10.9515	27.5295	10.4582
67641	0.91	0	0	0.185	0.5953	0.666667	16.1948	1.48745	0.472903	0	0	0	0	0	0	1.66663	0	0	31.0837	1.57095	0	0	0	0	0	147.296	0.472903	0	0.372903	1	0	0	0	0	1.0381	0	0.510776	-0.403722	0	0	0	0	0	0	0	0	0.059536	0	0
111966	1.2	0	0.75	-0.36	0.2958	1	35.0995	1.67665	0.504913	0	0.016	0	0	1.17764	7.16107	2.25951	0.031746	0	107.616	1.56452	0	0	0	88.5763	0	150.789	0.345861	0	0.543359	0	0	2.94168	88.2434	0	1.03491	0.0136054	1.86859	-0.167092	2.22e-16	7.70264	0.0138889	0	0	0	0	0	0.0446477	0	0
107120	1.56	0	0	0.284	0.91998	0.333333	16.6465	1.30942	0.76323	0	0	0	0	0	0	1.44461	0.111111	0	86.9662	1.87996	0	0	0	0	0	147.857	0.593063	0	0.652119	0	1	1	0	0	1.02585	0	0.399201	-0.339128	2.22e-16	0	0	0	0	0	0	0	0.0145926	0	0
110736	1.78	0	0.6	-0.462	-0.4118	1	25.2795	1.60277	0.787659	0	0.04	0	0	0.196035	6.71846	2.07234	0.0555556	0	94.574	2.29162	0	0	0	31.0837	0	155.949	0.560646	1	0.816442	0	0	1.65096	74.8549	0	1.31513	0	1.00208	-0.44882	2.22e-16	7.27926	0	0	0	0	0	0	0.254823	0	0
554121	1.89	0	0.4	0.494	0.5694	0.8	22.4363	1.51229	0.784069	0	0	0	0	0	0	1.9273	0.133333	0	115.688	2.09307	0	0	1	0	0	149.123	0.549744	0	0.784069	1	1	0	72.9102	0	0.936377	0	0	-0.644301	1.11e-16	6.91805	0	0	0	0	0	0	0.00946729	1	0
627305	2.07	0	0.5	0.624	0.6076	1	20.5162	1.18109	0.860529	0	0	0	0	0	0	1.72656	0.0740741	0	87.1519	2.29248	0	0	0	0	0	150.625	0.639471	0	0.860529	0	1	2.3811	62.4429	0	0.627766	0	0.958965	-0.444245	1.11e-16	7.48138	0	0	0	0	0	0	0.000369	0	0
100709	2.16	0	0	-0.4	0.95328	0	32.637	0.824378	0.889471	6	0.0503704	0	0.5	0.216548	0	1.11353	0.0493827	0	156.277	2.52206	0	0	1	0	0	144.786	0.70351	0	1	0	0	5.08568	128.153	0	0.633931	0	0.486404	-0.337284	0.0775576	7.8329	0.0625	0	1	0	1	0	0.101188	3.04182	0
108214	2.28	0	0.333333	1.124	0.9579	0.833333	26.9114	1.50826	0.679585	0	0	0	0	0	0	1.84361	0.0634921	0	123.401	2.01574	0	0	1	0	0	148.227	0.493152	0	0.679585	1	1	0	93.4368	0	0.998993	0	0.424198	-0.704411	1.11e-16	7.73305	0	1	0	0	0	0	0.000841	0	0.5
629403	2.41	0	0.555556	1.366	2.37416	0.555556	33.142	1.23924	0.571898	0	0.0133333	0	0	0.921451	7.56945	1.33472	0.0277778	0	119.454	1.86763	0	0	0	133.112	0	145.35	0.418805	0	0.61267	0	6	11.2406	121.524	0	1.02077	0.0102041	0.351906	-0.271111	5e-16	7.25186	0.0111111	0	0	0.0123457	0	0	1.02617	0	0
6485558	2.47	0	0	0.344	0.3832	0.25	32.9367	1.43817	0.658389	0	0.0740741	0	0.285714	0	0	1.84656	0.0666667	0	95.572	2.05805	0	0	0	0	0	151.252	0.468557	1	0.658389	0	2	0.5	72.9102	0	1.13149	0	0	-0.346092	5.63e-17	6.91805	0	2	1	0	0	0	0.30195	2.3094	0.5
127004	2.59	0	0.25	0.726	0.606	1	22.189	1.18109	0.79649	0	0	0	0	0	0	1.72656	0.111111	0	56.171	2.29248	0	0	0	0	0	150.625	0.639471	0	0.646798	0	1	0	0	0	0.627766	0	0.830564	-0.483664	0.0608102	0	0	1	0	0	0	0	0.0879122	1	0
50066	2.68	0	0.111111	1.121	0.7004	0.166667	62.5323	0.905586	0.764913	6	0.0373946	0	0.413793	0.891606	7.75084	1.23515	0.111111	0	193.444	3.28613	0	0	2	95.8719	1	147.864	0.676439	2	0.833124	3	1	6.94563	152.612	0	0.720792	0.028	0.513143	-0.64559	0.0784523	7.94044	0.0285494	0	1	0.0204082	1	0	0.073008	7.5182	2.6727
1482151	2.74	0	0.142857	1.06	1.10619	0.714286	32.6321	1.28729	0.646809	0	0	0	0	0	0	1.31882	0.177778	0	96.4684	2.42322	0	0	0	0	0	146.507	0.56068	0	0.742422	0	0	0	49.1709	0	1.21159	0	0.615585	-0.652782	0.0192254	6.80477	0	1	0	0	0	0	1.06523	0.5	0
1122549	2.86	0	0.111111	-0.246	1.2842	0.222222	36.9366	0.977657	0.894455	6	0.0382222	0	0.375	0.0900705	0	1.25897	0.0808081	0	156.783	3.07782	0	0	2	0	1	144.58	0.769455	0	0.925705	1	0	3.30193	94.0529	0	0.739978	0	0.637445	-0.290542	0.030857	7.50364	0.0625	0	1	0	1	0	0.534215	4.29828	1
110861	2.9	0	0	-0.041	1.0816	0	27.3863	0.93952	0.875048	6	0	0	0.545455	0	0	1.25284	0	0	74.472	1.97175	0	0	2	0	0	145.464	0.569963	0	1	0	0	6.08364	31.0837	0	0.788009	0	1.2375	-0.155551	7.22e-16	6.71846	0	0	1	0	0	0	0.079186	0	0
1072975	2.99	0	0	0.378	1.83149	0.25	37.9853	0.623433	0.91685	6	0.151111	0	0.461538	0.872094	0	1.06602	0.0888889	0	137.15	3.02699	0	0	2	0	0	152.756	0.818007	0	0.958425	0	0	1.65096	99.8242	1	0.472338	0	0.565437	-0.669536	3.33e-16	7.26363	0	0	1	0	2	0	0.376382	4.24264	0.333333
100016	3.04	0	0.1	0.541	1.036	0.3	37.7233	0.784051	0.6875	6	0.0637037	0	0.375	0.253392	9.47117	0.86329	0.102564	0	129.759	2.75	1	0	0	82.0136	0	155.732	0.6875	0	0.78125	1	0	3.30193	106.187	1	0.673196	0	0.384981	-0.518077	0.0154558	8.18001	0.0787037	0	0	0	2	0	0.1764	5.65685	0.333333
127662	3.11	0	0.0909091	1.24	1.26579	0.272727	48.1	0.904976	0.749352	6	0.0276543	0	0.285714	0.866443	6.81826	0.90923	0.118519	0	156.866	3.06021	0	0	0	51.997	1	142.123	0.69672	0	0.853535	0	0	6.94563	119.645	0	0.916581	0.04	0.692498	-0.572392	0.0188543	7.2157	0.0430556	0	0	0	1	0	2.77889	3.53278	0
314409	3.15	0	0.142857	1.408	1.79527	0.428571	47.9203	1.01711	0.826575	0	0.0587135	0	0.222222	0.856087	7.18871	1.66898	0.122222	0	167.909	3.01342	0	0	1	110.831	0	150.144	0.633753	0	0.87331	2	2	0	137.621	0	0.497942	0.0202041	0.464863	-0.842778	0.102621	8.18096	0.0319444	1	1	0	0	0	0.923713	1.76976	4.94145
110656	3.21	0	0	-0.88	-0.94601	0.4	23.117	1.02063	0.628076	0	0.04	0	0	4.81e-05	6.71846	1.12657	0.0555556	0	161.735	2.25163	0	0	0	31.0837	0	151.812	0.628076	0	0.628076	0	0	3.96541	81.6594	0	1.0111	0	1.20905	-0.558292	2.22e-16	8.39505	0	0	0	0	0	0	0.094249	0	0
106945	3.26	0	0.333333	2.094	1.7913	1	22.1216	1.12103	0.717376	0	0	0	0	0	0	1.53719	0.111111	0	70.0114	1.67293	0	0	0	0	0	145.847	0.483586	0	0.551448	0	1	1	0	0	0.500695	0	1.04428	-0.224306	2.22e-16	0	0	0	0	0	0	0	0.440498	0	0
99558	3.35	0	0.0909091	0.722	2.22702	0.363636	42.0053	0.880576	0.832615	6	0.0816667	0	0.315789	0.387539	9.47117	0.941247	0.118519	0	135.492	3.28663	1	0	0	82.0136	1	153.934	0.773702	0	0.916307	1	0	1.65096	95.0083	1	0.72699	0	0.353488	-0.50411	0.0570985	7.74414	0.0472222	0	0	0	3	0	0.750649	5.8538	1.65096
464459	3.39	0	0	2.734	2.1935	0.333333	44.2816	1.2601	0.653652	0	0.037037	0	0.241379	0	0	1.28216	0.179894	0	93.2222	2.06499	0	0	0	0	0	144.545	0.425072	0	0.740709	0	4	1.65096	37.8021	0	1.19671	0	0.681997	-0.479766	0.0569306	6.95539	0	2	0	0	0	0	0.889626	3.96541	0.5
80524	3.42	0	0.0833333	1.443	1.6313	0.5	50.8577	1.36491	0.576328	0	0.0681481	0	0.176471	0.710413	7.60459	1.39815	0.116959	0	89.8818	2.15177	0	0	0	103.091	0	151.236	0.422956	0	0.622577	0	4	3.30193	76.5453	2	1.38336	0	0.515726	-0.613376	0.000769	6.98194	0.104167	1	0	0	0	0	0.00121104	2.82843	0
621089	3.46	0	0.235294	0.936	3.3222	0.235294	78.061	0.90038	0.533112	12	0.0308148	0	0.5	0.857781	7.26875	0.945035	0.031746	0	159.017	2.29227	0	0	0	176.661	2	138.491	0.467154	0	0.663672	1	0	17.7703	171.455	0	0.832233	0.0167347	0.656207	0.00566437	1.28e-15	7.57656	0.0168651	0	0	0.00403124	2	1	3.67719	8.58831	0.25
111159	3.5	0	0.625	0.474	0.586	0.875	32.7501	1.52141	0.707069	0	0.032	0	0	0.305063	7.78815	1.98641	0.0555556	0	143.68	2.11734	0	0	1	150.681	0	149.229	0.482056	0	0.810169	1	0	1.65096	94.6508	0	0.941262	0.0272109	0.647727	-0.467826	0.0682267	7.57401	0.0277778	0	0	0	0	0	0.0197684	0.965489	0
103833	3.55	0	0.2	1.155	1.4087	0.4	48.7393	1.18453	0.635971	6	0.0444444	0	0.26087	0.90615	6.87813	1.51906	0.037037	0	105.191	2.38359	0	0	0	64.5449	1	146.484	0.526928	0	0.728334	0	0	7.73232	142.36	0	1.06383	0.04	1.06928	-0.00680636	0.0795974	7.21988	0.0236111	0	0	0	1	0	2.06554	3.96541	0
42454068	3.6	1	0.166667	0.566	1.34249	0.333333	40.8528	0.77143	0.931571	6	0.0594872	0	0.352941	0.0396123	9.47117	0.84479	0.0972222	0	176.014	3.33718	1	0	1	82.0136	1	150.084	0.816442	0	1	2	0	2.62074	136.142	0	0.598238	0	0.587708	-0.367159	0.0201005	9.37377	0.0426587	0	0	0	3	0	0.443023	7.48569	1.65096
71432	3.65	0	0	2.082	1.6866	0	30.9558	0.916667	0.278943	6	0	0	0.5	0	0	0.916667	0	0	72.9102	1	0	0	0	0	0	139.958	0.278943	0	0.278943	0	0	9.12547	31.0837	0	0.916667	0	1.22222	1.14e-16	7.22e-16	6.71846	0	0	0	0	0	0	1.96953	0	0
123728	3.69	1	0.5	1.156	0.9854	0.75	19.6534	1.48956	0.776432	0	0	0	0	0	0	1.62497	0.0740741	0	78.2915	2.18879	0	0	1	0	0	146.559	0.591494	0	0.818007	1	2	2.3811	56.5487	0	1.11564	0	0.644134	-0.230035	1.11e-16	8.09482	0	0	0	0	0	0	0.155472	0	0
88733	3.73	0	0.1	1.61	2.1072	0.3	38.8897	0.723138	0.774872	6	0.0377778	0	0.428571	0.000121	0	0.833934	0.102564	0	188.189	2.6645	1	0	0	0	0	148.485	0.699829	0	0.924957	1	0	3.96541	130.747	0	0.457355	0	0.378196	-0.14249	0.0515001	9.10633	0.0625	0	0	0	2	0	3.94181	4.29828	1
98168	3.77	0	0.0909091	1.204	1.9465	0.454545	39.7201	0.826726	0.787659	6	0.0666667	0	0.352941	1.16605	0	0.849849	0.0972222	0	140.337	2.74894	0	0	0	0	1	155.738	0.67253	0	0.902789	0	0	3.53278	134.477	1	0.596165	0	0.369041	-0.674746	0.0151942	9.2448	0.03125	0	0	0	2	0	1.23032	5.11154	0.5
607001	3.81	1	0.1875	1.408	3.74208	0.1875	69.3609	0.889438	0.519447	12	0.0212346	0	0.5	0.966794	7.19285	1.1733	0.0666667	0	193.382	1.88225	0	0	0	125.147	0	142.6	0.40044	0	0.67671	1	0	16.6515	186.77	0	0.747082	0.0158367	0.693707	-0.371354	1.17e-15	7.62329	0.0121528	0	0	0	2	0	1.46289	9.06132	0.5
3179906	3.84	0	0.214286	-1.27	0.6816	0.357143	100.168	0.807661	0.766876	12	0.0545299	0	0.318182	1.21988	8.13553	1.05489	0.0777778	0.00687005	220.578	3.73216	0	0	0	167.697	4	148.489	0.683617	2	0.783527	2	0	5.95512	204.074	0	0.80578	0.0204082	0.733478	-0.427257	0.263696	8.09697	0.0333924	0	0	0.011489	8	0	5.00864	20.3764	20.4354
106898	3.86	0	0.2	0.612	0.624	0.4	20.057	0.999926	0.879588	0	0	0	0.3	0	0	1.69477	0.166667	0	62.4429	2.16096	0	0	0	0	0	147.191	0.650515	0	0.879588	0	1	0.5	0	0	0.487831	0	1.28603	-0.192762	0.117817	0	0	1	0	0	0	0	0.316969	2	0
118616	3.92	0	0.25	2.206	1.5689	0.416667	47.6234	0.995889	0.829219	6	0.0318519	0	0.272727	1.18135	7.27327	1.16816	0.103704	0	175.282	3.20445	0	0	1	93.046	1	145.046	0.718578	0	0.910762	1	0	4.11402	155.434	0	0.800807	0.015102	0.581451	-0.571851	0.154167	8.21024	0.0297619	0	0	0	2	0	0.82138	6.55185	2.3811
96173	3.94	1	0.4	1.449	1.2314	0.8	24.4583	1.49112	0.72641	0	0	0	0	0	0	1.59998	0.133333	0	76.5112	2.09192	0	0	1	0	0	146.116	0.522979	0	0.82016	1	1	0.5	41.2697	0	1.17093	0	0.622977	-0.253041	1.11e-16	7.269	0	1	0	0	0	0	0.0180365	2	0
111875	3.98	0	0.75	3.127	2.3392	1	30.6451	1.55744	0.54998	0	0.016	0	0	0.888369	7.17295	1.59876	0.031746	0	97.4627	1.60686	0	0	0	84.4993	0	147.276	0.337939	0	0.67667	0	6	9.33326	94.762	0	1.43633	0.0136054	0.864157	-0.437659	2.22e-16	7.1033	0.0138889	0	0	0	0	0	4.51733	0	0
95578	4.05	0	0	1.312	2.0456	0.25	37.2775	0.690297	0.750549	6	0.111111	0	0.461538	0	0	0.837923	0.111111	0	130.369	2.46967	0	0	0	0	0	142.908	0.667399	0	0.91685	0	0	3.96541	69.1938	0	0.52886	0	0	-0.533082	5.55e-17	7.62523	0	0	0	0	2	0	1.46168	4.29828	1
97881	4.11	0	0.555556	2.064	1.83199	0.777778	37.155	1.38999	0.804526	0	0.04	0	0	1.07706	7.26262	1.5951	0.111111	0	110.615	2.62581	0	1	2	102.991	1	146.283	0.572701	0	0.840877	1	2	2.3811	140.86	0	1.04005	0.0204082	0.506943	-0.695625	0.143353	7.59972	0.0333333	0	0	0	0	0	0.30217	1.78549	1
555168	4.18	1	0.181818	0.647	1.2663	0.272727	39.2473	0.84483	0.8125	6	0.0527778	0	0.375	0.987107	11.4114	0.870942	0.0952381	0	152.47	2.7744	1	0	1	149.202	1	147.877	0.693599	0	0.90625	2	0	4.88359	130.69	0	0.537975	0.0272109	0.534918	-0.250273	0.0313481	8.64606	0.0746528	0	0	0	2	0	1.5097	6.59754	0.333333
937202	4.21	0	0.181818	1.425	2.15329	0.363636	49.9755	0.733952	0.798523	6	0.0477778	0	0.352941	0.619054	10.03	0.984342	0.111111	0	196.744	3.02864	0	0	0	251.431	1	139.91	0.740958	0	0.88487	1	0	4.25141	161.976	0	0.474066	0.0269388	0.630876	-0.276895	0.0336407	7.91308	0.0527778	0	0	0	2	0	3.44177	8.42164	1.31037
541731	4.26	0	0	1.97	2.9934	0.25	40.3882	0.646296	0.610529	6	0.0740741	0	0.5	0	0	0.899437	0.0666667	0	185.874	1.9183	0	0	0	0	0	138.775	0.535095	0	0.75	0	0	3.53278	93.802	0	0.458532	0	1.12052	-0.467182	3.89e-16	8.24429	0	0	0	0	2	0	4.58302	5.11154	0.5
91203	4.32	0	0	3.224	2.8398	0	49.1528	0.805263	0.440438	10	0.0474074	0	0.555556	0.765	6.71846	0.805263	0.0634921	0	156.948	1.39215	0	0	0	31.0837	2	137.88	0.333854	0	0.600313	0	0	11.6786	112.388	0	0.805263	0	1.02622	-0.0604179	2.78e-17	7.01092	0	0	0	0	0	0	3.79392	8.59656	1
108872	4.36	0	0	3.922	2.5866	0.142857	26.1737	1.42857	0.515073	0	0.111111	0	0.285714	0	0	1.42857	0.0555556	0	70.8827	1.30124	0	0	0	0	0	144.346	0.296254	0	0.598655	0	5	6.08364	46.575	0	1.42857	0	0.979299	-0.04915	0.0114498	6.79238	0	1	0	0	0	0	0.0481364	3.04182	0
709988	4.4	0	0.230769	1.802	3.3419	0.461538	57.6053	0.81009	0.81383	6	0.0557576	0	0.272727	1.1153	7.61494	1.22558	0.0915033	0	183.067	3.31764	0	0	1	139.538	0	145.894	0.74396	1	0.910762	1	1	2.14426	185.072	0	0.510901	0.0318367	0.534421	-0.624311	0.122172	7.83637	0.0316358	0	0	0	3	0	1.31171	7.57937	2.40685
7700176	4.42	1	0.380952	1.661	2.21719	0.571429	83.0298	1.18779	0.75909	6	0.0288889	0	0.15	1.01034	7.4975	1.58384	0.0873016	0.0056395	172.261	3.2438	0	0	1	132.669	1	144.884	0.609515	0	0.822553	2	1	6.01051	159.887	0	0.777327	0.0163673	0.548273	-0.840811	0.0116239	8.05143	0.0310847	1	0	0.0134543	1	0	2.48788	7.70204	2.40685
19406510	4.46	0	0.142857	0.939	1.44782	0.428571	45.223	0.827308	0.766803	6	0.0612866	0	0.285714	0.200346	6.71846	0.954045	0.1	0	174.184	3.36804	2	0	0	31.0837	1	158.625	0.766803	0	0.818353	2	0	0.5	134.137	1	0.593956	0	0.373636	-0.414526	5.55e-16	9.08332	0.0363248	0	0	0	4	0	1.16575	5.11154	3.53278
141935	4.51	0	0.2	3.794	2.8114	0.4	49.2166	1.15	0.640948	6	0.0546032	0	0.25	1.07532	6.81826	1.15	0.0555556	0	140.597	2.28416	0	0	0	51.997	2	142.152	0.498185	0	0.713649	0	2	6.6035	110.582	0	1.15	0	0.883184	-0.0450241	2.22e-16	7.00442	0.0451389	0	0	0	2	0	2.64388	7.41258	0.5
831823	4.58	0	0.133333	1.871	3.68529	0.2	63.7916	0.827856	0.538401	12	0.0448485	0	0.541667	1.11082	7.26697	0.921284	0.0467836	0	168.953	2.0094	0	0	0	147.215	0	141.794	0.438258	0	0.761315	0	0	11.3306	200.376	0	0.774928	0.0177778	0.628877	-0.500218	1.39e-16	7.45381	0.00631313	0	0	0.0123457	3	0	1.43042	10.1705	0.965489
135193	4.62	0	0	2.088	2.5454	0.0833333	50.7583	0.761313	0.648047	10	0.0694444	0	0.526316	0.877757	7.34884	0.760179	0.0694444	0	159.469	2.07409	0	0	0	58.0003	2	140.256	0.488259	0	0.832615	0	0	8.78097	126.401	0	0.799098	0.04	0.554976	-0.475407	0.0241558	7.35117	0.0208333	0	0	0	1	0	1.91739	10.6179	1.65096
2051607	4.67	0	0.0714286	3.229	4.0554	0.142857	64.1876	0.757279	0.509324	12	0.025641	0	0.545455	1.12426	7.0893	0.832191	0.0740741	0	205.949	1.77495	0	0	0	99.0681	2	137.933	0.398021	0	0.731269	0	0	12.4072	196.436	0	0.542481	0.0236735	1.09708	-0.214344	0.0483221	7.46779	0.0166667	0	0	0	1	0	7.75233	11.3998	2.3811
634673	4.73	0	0	2.055	3.229	0.4	48.6542	0.466055	0.798231	6	0.0874074	0	0.428571	0.137361	0	0.792648	0.142857	0	201.225	2.69951	0	0	0	0	0	147.429	0.709026	0	0.924957	0	0	1	126.94	1	0.498457	0	0.585372	-0.48331	7.49e-16	8.31113	0	0	0	0	4	0	1.72344	4.29828	3.96541
107142	4.75	0	0	0.268	0.74878	0.333333	16.3762	0.809086	0.871049	0	0	0	0	0	0	1.36144	0.111111	0	0	2.25163	0	0	0	0	0	148.543	0.871049	0	0.537716	0	0	1	0	0	0.501235	0	0.50469	-0.162628	2.22e-16	0	0	0	0	0	0	0	0.33316	0	0
62737	4.8	1	0.4	1.207	1.62659	0.8	42.2758	1.11786	0.713427	0	0.06	0	0	0.687113	9.0072	2.2726	0.119658	0	172.34	2.97494	0	0	2	125.161	0	148.35	0.713427	0	0.676724	1	0	0	201.58	0	0.61037	0	0.693688	-0.955433	0.1254	8.6779	0.0277778	0	0	0	0	0	1.0675	1	0
616739	4.86	0	0.142857	2.208	1.57122	0.428571	43.2787	0.836312	0.85244	6	0.051358	0	0.3	0.312214	9.47117	0.923939	0.111111	0	174.834	3.48418	2	0	0	82.0136	1	155.536	0.806164	0	0.898715	2	0	0.333333	132.529	0	0.569618	0	0.431604	-0.379417	1.33e-15	9.10025	0.0694444	0	0	0	4	0	2.9354	5.65685	3.30193
55630	4.92	0	0.571429	0.976	-1.4431	0.785714	28.5429	1.25955	0.696146	0	0.048	0	0	0.166774	12.7914	1.41518	0.0653595	0	153.651	2.69047	3	0	0	220.746	0	171.609	0.622516	0	0.728018	3	1	0.5	163.113	0	0.458075	0.0313972	0.316841	-0.659846	3.65e-16	10.5457	0.0243056	1	0	0	0	0	4.20373	2	0
636306	5	0	0	2.055	3.229	0.4	48.6542	0.466055	0.798231	6	0.100741	0	0.428571	0.137361	0	0.792648	0.126984	0	201.225	2.69951	0	0	0	0	0	147.429	0.709026	0	0.887436	0	0	0.333333	158.577	1	0.498457	0	0.566905	-0.55291	3.89e-16	8.39776	0	0	0	0	4	0	1.72344	5.65685	3.30193
109773	5.07	0	0	-0.657	0.42366	0	16.9464	0.920102	0.69468	0	0	0	0	0	0	1.12606	0.0740741	0	243.314	1.95021	0	0	0	0	0	147.858	0.69468	0	0.551822	0	1	2.3811	0	0	0.613766	0	0.646455	-0.087997	1.11e-16	0	0	0	0	0	0	0	0.0108576	0	0
1740198	5.16	0	0.0833333	5.656	4.9049	0.291667	90.7671	1.11096	0.70313	6	0.0531111	0	0.28	0.76253	7.18553	1.13866	0.128655	0	153.926	2.79778	0	0	1	125.671	3	142.609	0.495722	0	0.826291	1	5	9.12534	126.368	0	1.02506	0.0298604	0.304081	-0.614785	0.181353	7.24259	0.0375958	2	0	0.021472	3	0	2.95152	16.7051	4.77054
118558	5.26	0	0.176471	2.679	3.11219	0.235294	67.9164	0.816945	0.616289	12	0.0360784	0	0.538462	0.961048	7.58666	0.927114	0.0707071	0	181.841	2.42895	0	0	1	192.941	1	141.666	0.51675	0	0.810824	1	0	10.1548	197.334	0	0.718	0.00948195	0.569978	-0.557331	0.0828581	8.22671	0.0272817	0	0	0.0105316	3	0	2.2807	11.45	3.14735
634662	5.29	0	0	3.124	4.3002	0.4	49.8206	0.504279	0.535095	6	0.0874074	0	0.5	0	0	0.895635	0.142857	0	298.837	1.9183	0	0	0	0	0	137.591	0.535095	0	0.628076	0	0	1	251.431	0	0.556125	0	1.21795	-0.211254	7.49e-16	10.03	0	0	0	0	4	0	8.28404	4.29828	3.96541
58902	5.35	0	0	3.043	4.0058	0.454545	51.4261	0.377356	0.792125	6	0.0795062	0	0.461538	0.178593	0	0.783216	0.138889	0	299.66	2.46967	0	0	0	0	0	141.269	0.667399	0	1	0	0	0	205.058	0	0.586393	0	0.64512	-0.397635	1.05e-16	9.4373	0	0	0	0	5	0	5.35969	3.04182	6.08364
1563662	5.42	0	0.176471	1.484	2.61909	0.352941	63.0223	1.06673	0.811046	6	0.0533333	0	0.290323	1.27941	7.56816	1.38528	0.08	0	148.258	3.29086	0	0	0	116.753	1	146.979	0.664256	1	0.842006	1	1	3.14735	190.761	0	0.80852	0.0340713	0.435576	-0.746558	0.201562	7.95153	0.0294281	0	0	0	3	0	1.19618	6.85406	3.14735
88857	5.54	0	0.235294	3.745	2.81069	0.529412	55.1222	1.01089	0.818927	6	0.0529778	0	0.206897	0.873743	8.64529	1.07562	0.111111	0	170.735	3.39145	2	0	0	96.4689	1	152.063	0.69812	0	0.889909	2	1	0.965489	151.234	0	0.677552	0.0119568	0	-0.37964	0.0445336	8.11043	0.0536616	1	0	0	4	0	0.937024	7.58543	5.45069
23184669	5.65	0	0.47619	3.572	4.68449	0.666667	88.4505	1.19981	0.757593	6	0.0416162	0	0.12766	1.18171	7.48401	1.55095	0.0854701	0.00411523	178.213	2.90977	0	0	1	116.427	2	145.816	0.523849	0	0.830446	1	4	10.9432	165.771	0	0.774206	0.0156044	0.690309	-0.374974	0.375865	7.60759	0.0252525	0	0	0.00890233	3	0	0.180795	13.1394	3.30193
593088	5.74	0	0.769231	5.559	4.4963	0.923077	47.4227	1.49605	0.491632	0	0.016	0	0	0.940063	7.07977	1.53845	0.034188	0.00826446	106.62	1.55341	0	0	0	104.568	0	145.027	0.291888	0	0.599876	1	10	15.1596	106.078	0	1.34708	0.0102041	0.499931	-0.282913	0.0444945	7.06062	0.0123457	0	0	0.00823045	0	0	7.6165	2.20813	0
7307553	5.91	0	0.818182	4.767	3.4759	1	41.0374	1.54523	0.463216	0	0.01	0	0	0.940294	7.0125	1.55603	0.0222222	0.00826446	100.929	1.57239	0	0	0	96.0077	0	148.575	0.301834	0	0.572387	0	9	15.1596	99.6675	1	1.53986	0.00680272	0.929797	-0.447146	0	7.00666	0.00793651	0	0	0.00617284	0	0	10.7518	0	0
299843	6.02	0	0.25	4.028	4.71429	0.5625	74.8251	0.810009	0.74314	6	0.0669136	0	0.25	0.999775	7.99507	1.3507	0.115942	0	236.937	3.20915	0	0	0	167.385	0	142.538	0.699929	0	0.804526	0	0	0.333333	260.266	0	0.47328	0.0280691	1.2483	-0.672992	0.048686	8.46715	0.0281863	0	0	0	4	0	9.41078	5.65685	3.30193
55406536	6.15	0	0.545455	2.729	1.98819	0.636364	51.5172	0.948456	0.847737	0	0.0266667	0	0	1.04485	7.74315	1.37228	0.0606061	0	140.648	2.91606	0	0	0	158.925	0	148.739	0.636004	1	0.884088	1	2	4.72177	151.108	0	0.502381	0.0058309	0	-0.883826	5.55e-17	7.75664	0.0208333	0	0	0.00823045	0	0	0.182329	2.08008	0
882337	6.3	0	0.2	2.392	3.91909	0.2	76.154	0.730311	0.448114	12	0.0302222	2	0.583333	1.12473	7.17718	0.702013	0.037037	0	199.892	1.65002	0	0	0	185.924	0	135.736	0.359877	0	0.586422	0	0	12.7379	241.42	0	0.511764	0.000163	1.29962	-0.137783	6.11e-16	7.41232	0.0180556	0	0	0.00806248	2	0	9.57531	7.16293	0.333333
2869343	6.48	0	0.846154	5.905	4.2561	1	46.8606	1.53832	0.41974	0	0.008	0	0	0.950429	7.00666	1.54628	0.0185185	0.00413223	102.804	1.50916	0	0	0	99.6675	0	147.971	0.27812	0	0.519049	0	11	19.1782	101.955	1	1.53438	0.00510204	0	-0.425817	2.22e-16	7.00302	0.00617284	0	0	0.00411523	0	0	14.861	0	0
623256	6.65	0	0.2	1.652	2.4852	0.4	49.1712	0.808005	0.600313	6	0.0637037	0	0.333333	1.75306	8.33092	1.04571	0.0740741	0	148.397	2.50326	0	0	0	125.439	2	140.632	0.600313	0	0.653604	0	0	6.5801	124.664	0	0.494731	0.0204082	0.950595	-0.129169	5e-16	7.53853	0.0601852	0	0	0	2	0	6.37058	7.55953	0.333333
12789036	6.9	0	0	4.355	5.60899	0.4	78.1776	0.533092	0.818246	0	0.0604815	0	0.416667	0.110399	0	1.0266	0.168168	0	268.409	2.87581	0	0	0	0	0	138.785	0.627228	0	0.884088	0	4	0	271.968	0	0.502673	0	0.873751	-0.0783227	0.154052	9.33416	0.0479861	4	0	0	0	0	17.9997	3.14735	7.24289
309002	7.65	2	0	4.156	5.12258	0.285714	78.0286	0.574677	0.803619	0	0.0547569	0	0.461538	0.468901	9.0072	0.910244	0.148148	0	245.834	3.25776	0	0	0	125.161	0	138.035	0.693075	0	0.803619	0	2	1.88988	228.876	0	0.442069	0.04	0.998185	-0.064203	0.0851398	8.45569	0.0460417	4	0	0	0	0	9.3685	7.77072	7.38314
[truncated: 8 more columns]
